# Supplementary material for: Exploratory analysis of L1 retrotransposons expression in autism
Source: Springer Nature journal article supplement (doi:10.1186/s13229-023-00554-5), 2023-06-28
Supplement: MOESM4 [file 25547840]

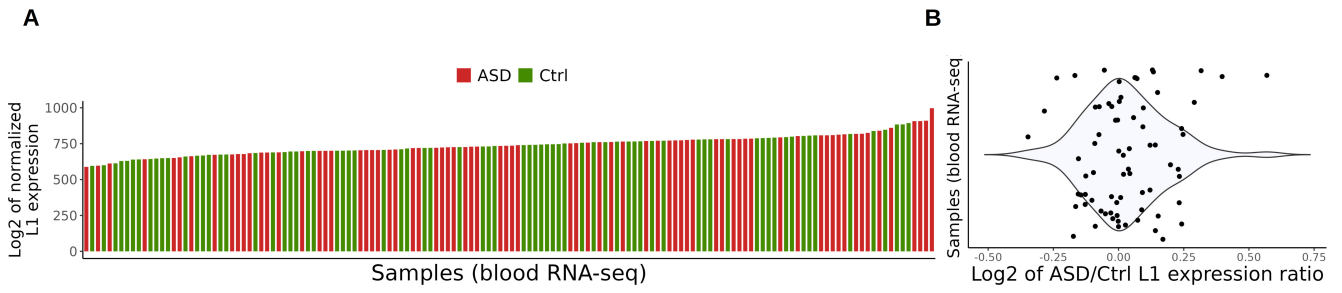

**Fig. S1** Results from the Blood cohort. **A** Normalized expression of L1 elements. **B** Expression ratio of L1 elements between ASD and control siblings.

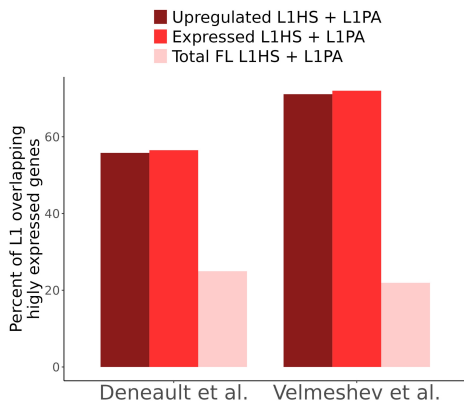

**Fig. S2** Overlap between different groupings of L1 and expressed genes.

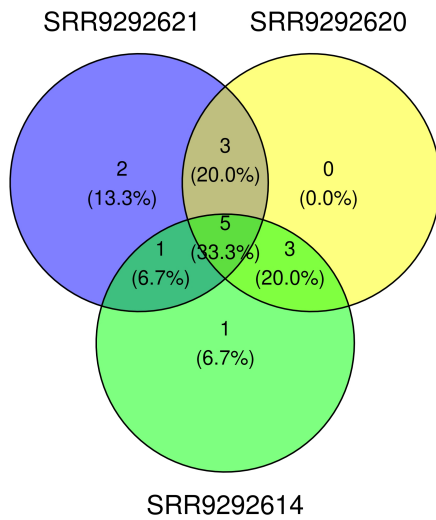

**Fig. S3** Overlaps between negatively correlated genes from the 3 ACC significant samples of the Velmeshev dataset.

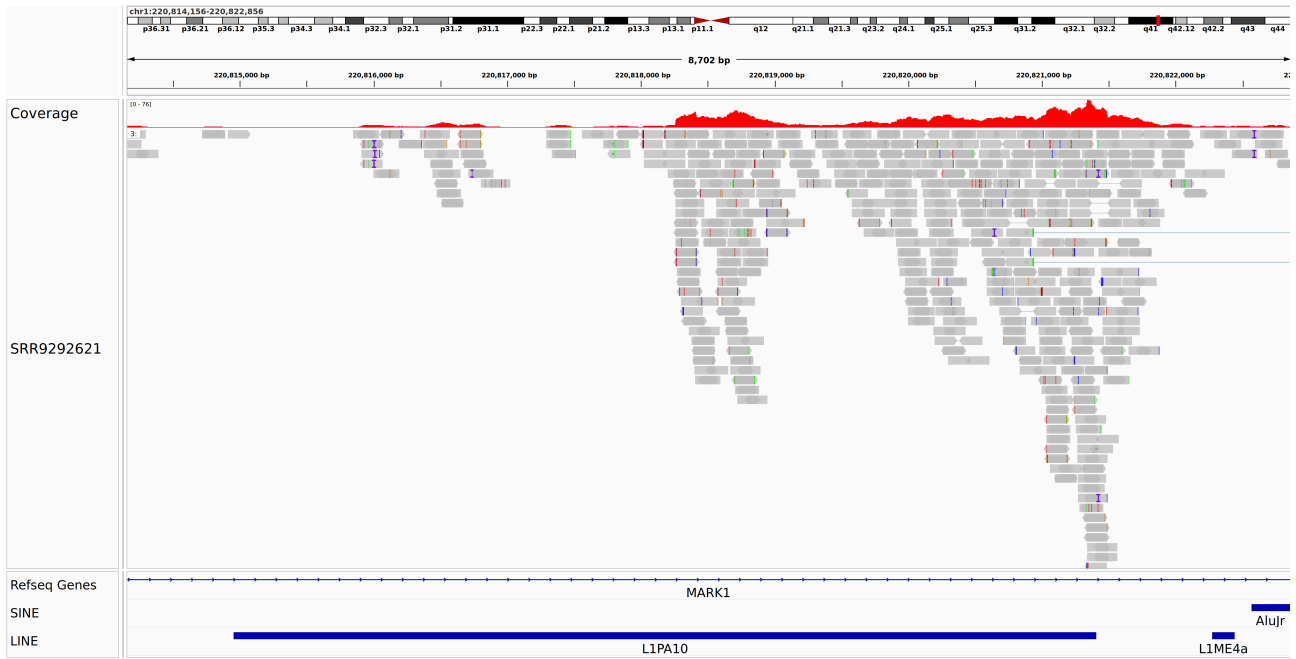

**Fig. S4** Reads mapping on L1 intronic to the MARK1 gene in the SRR9292621 sample.

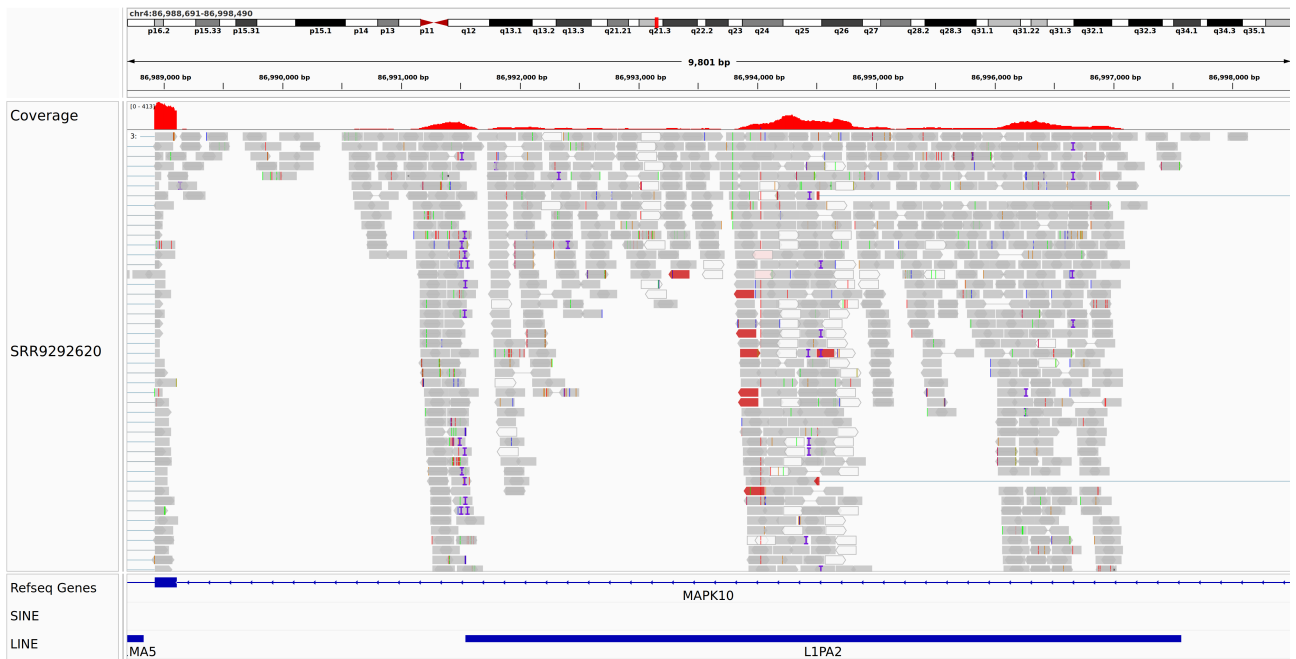

**Fig. S5** Reads mapping on L1 intronic to the MAPK10 gene in the SRR9292620 sample.

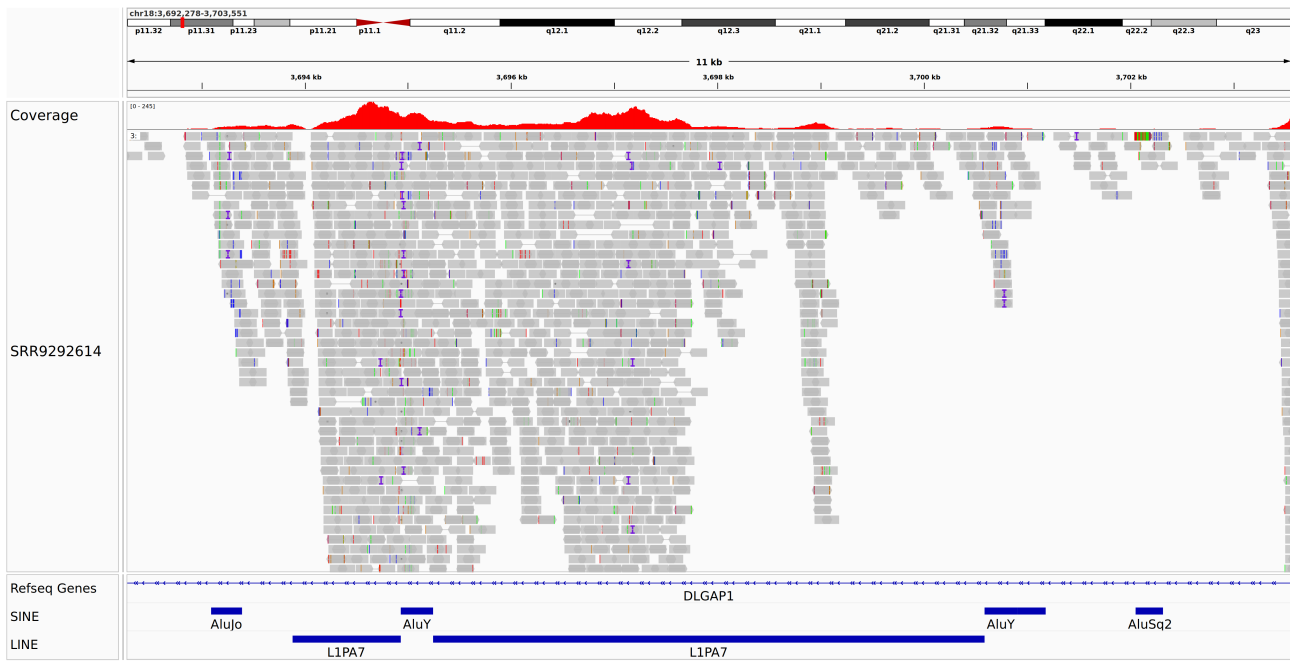

**Fig. S6** Reads mapping on L1 intronic to the DLGAP1 gene in the SRR9292614 sample.
