# Supplementary material for: Exploratory analysis of L1 retrotransposons expression in autism﻿
Source: Mol Autism. 2023 Jun 28;14:22. doi: 10.1186/s13229-023-00554-5 (PMC10303858; doi:10.1186/s13229-023-00554-5)
Supplement: Supplementary file 5 — Additional file 5: Table S11. IRFinder results on single samples. Table S12. Expressed L1/gene pairs overlaps. Table S13. Upregulated L1/gene pairs. Table S14. Upregulated L1/exp gene pairs. Table S15. Velmeshev ACC FL L1/host gene correlation. Table S16. Velmeshev PFC FL L1/host gene correlation. Table S17. Deneault iPSC FL L1/host gene correlation. Table S18. Deneault Neurons FL L1/host gene correlation. [file 13229_2023_554_MOESM5_ESM.xls]

## Sheet: Table S11. IRFinder_single_sample
Sample	number_of_retained_introns	number_of_upregulated_L1s	number_of_upregulatedL1s_IR_overlaps	Group	Tissue
SRR9292593	1302	1	0	Ctrl	ACC
SRR9292594	902	1	0	Ctrl	ACC
SRR9292595	1919	10	0	ASD	PFC
SRR9292596	2164	14	0	ASD	ACC
SRR9292597	1150	0	0	ASD	ACC
SRR9292598	1669	21	0	Ctrl	PFC
SRR9292599	2301	8	0	Ctrl	ACC
SRR9292600	1847	0	0	Ctrl	ACC
SRR9292601	1414	0	0	ASD	PFC
SRR9292602	1502	6	0	ASD	ACC
SRR9292603	1863	1	0	Ctrl	PFC
SRR9292604	1341	2	0	ASD	PFC
SRR9292605	1525	3	0	Ctrl	PFC
SRR9292606	1136	7	0	ASD	PFC
SRR9292607	1816	3	0	ASD	ACC
SRR9292608	1050	0	0	ASD	PFC
SRR9292609	1285	1	0	ASD	PFC
SRR9292610	1470	0	0	ASD	ACC
SRR9292611	362	0	0	Ctrl	ACC
SRR9292612	1042	0	0	Ctrl	PFC
SRR9292613	1741	5	0	ASD	PFC
SRR9292614	1446	52	0	ASD	ACC
SRR9292615	911	1	0	Ctrl	PFC
SRR9292616	1789	0	0	Ctrl	PFC
SRR9292617	2112	6	0	Ctrl	ACC
SRR9292618	1564	2	0	ASD	PFC
SRR9292619	1559	1	0	ASD	PFC
SRR9292620	1460	62	0	ASD	ACC
SRR9292621	1617	56	0	ASD	ACC
SRR9292622	1950	18	0	Ctrl	ACC
SRR9292623	1575	14	0	ASD	PFC
SRR9292624	1169	0	0	Ctrl	ACC
SRR9292625	834	0	0	ASD	ACC
SRR9292626	800	1	0	ASD	PFC
SRR9292627	1449	7	0	Ctrl	PFC
SRR9292628	1593	0	0	ASD	PFC
SRR9292629	1649	6	0	ASD	PFC
SRR9292630	1491	0	0	Ctrl	PFC
SRR9292631	1836	2	0	Ctrl	ACC
SRR9292632	1570	0	0	Ctrl	PFC
SRR9292633	1166	3	0	Ctrl	PFC

## Sheet: Table S12. Exp L1 - gene pairs overlaps
L1_chr	L1_start	L1_end	L1_ID	L1_strand	L1_genomic_localization	Gene_chr	Gene_start	Gene_end	Gene_strand	Gene_name	Dataset
chr1	43580198	43586187	L1PA2:L1:LINE	-	Exonic	chr1	43585818	43585943	+	FAM183A	Deneault et al.
chr1	92853959	92860042	L1PA7:L1:LINE	+	Intronic	chr1	92853732	92867613	+	RPAP2	Deneault et al.
chr1	100665158	100671644	L1PA7:L1:LINE	+	Intronic	chr1	100661978	100671785	-	DBT	Deneault et al.
chr1	117517360	117523487	L1PA5:L1:LINE	+	Intronic	chr1	117516945	117527301	+	PTGFRN	Deneault et al.
chr1	121143307	121149329	L1PA3:L1:LINE	+	Intronic	chr1	121138614	121205362	+	LINC02798	Deneault et al.
chr1	121316087	121322219	L1PA3:L1:LINE	+	Intronic	chr1	121313686	121317500	+	EMBP1	Deneault et al.
chr1	121316087	121322219	L1PA3:L1:LINE	+	Intronic	chr1	121315744	121322322	-	LINC01691	Deneault et al.
chr1	143125606	143131754	L1PA2:L1:LINE	-	Intronic	chr1	143119119	143168647	-	RP11-782C8.2	Deneault et al.
chr1	143125606	143131754	L1PA2:L1:LINE	-	Intronic	chr1	143119119	143168647	+	RP11-782C8.1	Deneault et al.
chr1	149923964	149930070	L1PA5:L1:LINE	-	Intronic	chr1	149922124	149931602	-	OTUD7B	Deneault et al.
chr1	171519607	171525696	L1PA6:L1:LINE	-	Intronic	chr1	171519379	171526378	+	PRRC2C	Deneault et al.
chr1	172560414	172566554	L1PA5:L1:LINE	-	Intronic	chr1	172560211	172569203	+	SUCO	Deneault et al.
chr1	180835947	180841979	L1HS:L1:LINE	-	Intronic	chr1	180833010	180842938	+	XPR1	Deneault et al.
chr1	220814954	220821404	L1PA10:L1:LINE	+	Intronic	chr1	220809368	220823961	+	MARK1	Deneault et al.
chr10	33201104	33207283	L1PA5:L1:LINE	+	Exonic	chr10	33200813	33201052	-	ITGB1	Deneault et al.
chr10	86039723	86045762	L1PA2:L1:LINE	+	Exonic	chr10	86039735	86039821	+	LINC00858	Deneault et al.
chr10	96865055	96871181	L1PA6:L1:LINE	-	Intronic	chr10	96868893	96928182	-	AL157834.1	Deneault et al.
chr10	102166087	102172241	L1PA4:L1:LINE	+	Intronic	chr10	102148116	102213800	+	OLMALINC	Deneault et al.
chr10	118692681	118699122	L1PA7:L1:LINE	-	Intronic	chr10	118689513	118699976	-	SHTN1	Deneault et al.
chr11	2655404	2661585	L1PA5:L1:LINE	-	Exonic	chr11	2629557	2721228	-	KCNQ1OT1	Deneault et al.
chr11	3514186	3520281	L1PA4:L1:LINE	-	Intronic	chr11	3450988	3521851	-	AC127526.3	Deneault et al.
chr11	3514186	3520281	L1PA4:L1:LINE	-	Intronic	chr11	3490549	3552558	+	AC127526.1	Deneault et al.
chr11	3514186	3520281	L1PA4:L1:LINE	-	Intronic	chr11	3502750	3602441	-	AC127526.2	Deneault et al.
chr11	11906779	11912696	L1PA10:L1:LINE	+	Intronic	chr11	11906127	11913514	+	USP47	Deneault et al.
chr11	14616306	14622422	L1PA6:L1:LINE	-	Intronic	chr11	14541991	14665181	-	PSMA1	Deneault et al.
chr11	43367651	43373668	L1PA2:L1:LINE	-	Intronic	chr11	43366080	43380434	-	AC087276.2	Deneault et al.
chr11	58638766	58644895	L1PA4:L1:LINE	-	Intronic	chr11	58611997	58652423	-	GLYATL2	Deneault et al.
chr11	77037749	77042841	L1PA4:L1:LINE	+	Intronic	chr11	77036421	77043774	-	PAK1	Deneault et al.
chr11	82977176	82983297	L1PA6:L1:LINE	+	Intronic	chr11	82977021	82984689	-	CCDC90B	Deneault et al.
chr11	96138784	96144829	L1PA2:L1:LINE	-	Intronic	chr11	96126727	96176445	+	JRKL	Deneault et al.
chr11	102239897	102245923	L1PA2:L1:LINE	-	Intronic	chr11	102239279	102248226	+	BIRC2	Deneault et al.
chr11	108227658	108233694	L1PA2:L1:LINE	+	Intronic	chr11	108225601	108235808	+	ATM	Deneault et al.
chr11	108227658	108233694	L1PA2:L1:LINE	+	Intronic	chr11	108225601	108235808	-	C11orf65	Deneault et al.
chr11	113094669	113100816	L1PA5:L1:LINE	+	Intronic	chr11	113092047	113101917	+	NCAM1	Deneault et al.
chr12	4618061	4624067	L1PA2:L1:LINE	+	Intronic	chr12	4614546	4626226	-	C12orf4	Deneault et al.
chr12	4781112	4787459	L1PA7:L1:LINE	+	Intronic	chr12	4778983	4791370	+	AC005833.1	Deneault et al.
chr12	4781112	4787459	L1PA7:L1:LINE	+	Intronic	chr12	4778983	4791370	+	NDUFA9	Deneault et al.
chr12	29475994	29481840	L1PA4:L1:LINE	+	Intronic	chr12	29474857	29485532	+	FAR2	Deneault et al.
chr12	46583731	46589869	L1PA6:L1:LINE	-	Intronic	chr12	46582854	46591502	-	SLC38A1	Deneault et al.
chr12	48068016	48073191	L1PA6:L1:LINE	+	Exonic	chr12	48073275	48073377	-	RPAP3	Deneault et al.
chr12	79433401	79439425	L1PA2:L1:LINE	-	Exonic	chr12	79439432	79439606	+	SYT1	Deneault et al.
chr12	96709720	96715749	L1PA2:L1:LINE	+	Intronic	chr12	96707232	96717725	-	CDK17	Deneault et al.
chr12	105401334	105407760	L1PA7:L1:LINE	-	Intronic	chr12	105388505	105413561	+	C12orf45	Deneault et al.
chr13	41438707	41444734	L1PA3:L1:LINE	-	Intronic	chr13	41386596	41486024	-	TPTE2P5	Deneault et al.
chr13	49039691	49045702	L1HS:L1:LINE	+	Intronic	chr13	49039504	49047495	+	RB1	Deneault et al.
chr13	53289490	53295879	L1PA7:L1:LINE	-	Intronic	chr13	53287004	53298131	-	CNMD	Deneault et al.
chr13	77773162	77779196	L1PA3:L1:LINE	+	Intronic	chr13	77768379	77779390	-	MYCBP2	Deneault et al.
chr13	111321942	111328064	L1PA5:L1:LINE	+	Intronic	chr13	111319820	111329320	-	CARS2	Deneault et al.
chr14	20748206	20754353	L1PA4:L1:LINE	+	Intronic	chr14	20724717	20757300	-	TTC5	Deneault et al.
chr14	41418121	41424139	L1PA3:L1:LINE	-	Exonic	chr14	41423915	41424157	+	LINC02315	Deneault et al.
chr14	55414793	55420840	L1PA5:L1:LINE	+	Intronic	chr14	55411188	55422278	-	WDHD1	Deneault et al.
chr14	71545567	71552023	L1PA7:L1:LINE	-	Intronic	chr14	71543136	71555046	+	PCNX1	Deneault et al.
chr14	88922077	88928190	L1PA4:L1:LINE	-	Intronic	chr14	88904804	88932121	+	SPATA7	Deneault et al.
chr15	25500760	25506894	L1PA5:L1:LINE	+	Intronic	chr15	25497480	25509673	+	SNHG14	Deneault et al.
chr15	25500760	25506894	L1PA5:L1:LINE	+	Intronic	chr15	25500726	25502174	+	AC124303.1	Deneault et al.
chr15	28399917	28406027	L1PA5:L1:LINE	-	Intronic	chr15	28397976	28408239	-	HERC2	Deneault et al.
chr15	56426816	56432826	L1PA2:L1:LINE	-	Intronic	chr15	56395868	56434975	-	RFX7	Deneault et al.
chr15	63909208	63914241	L1PA4:L1:LINE	-	Intronic	chr15	63908881	63915013	-	HERC1	Deneault et al.
chr15	81960854	81966845	L1PA2:L1:LINE	-	Intronic	chr15	81846344	81989121	+	AC023034.1	Deneault et al.
chr15	81960854	81966845	L1PA2:L1:LINE	-	Intronic	chr15	81925767	82305920	-	AC104041.1	Deneault et al.
chr15	81960854	81966845	L1PA2:L1:LINE	-	Intronic	chr15	81719789	82047558	+	AC060809.1	Deneault et al.
chr15	82090271	82096304	L1PA2:L1:LINE	+	Intronic	chr15	81925767	82305920	-	AC104041.1	Deneault et al.
chr15	82163008	82169040	L1PA2:L1:LINE	+	Intronic	chr15	81925767	82305920	-	AC104041.1	Deneault et al.
chr15	82287507	82293537	L1PA2:L1:LINE	+	Intronic	chr15	81925767	82305920	-	AC104041.1	Deneault et al.
chr15	90177549	90183532	L1PA3:L1:LINE	+	Intronic	chr15	90177114	90185433	-	KIF7	Deneault et al.
chr15	97975923	97982079	L1PA3:L1:LINE	+	Intronic	chr15	97897019	98066672	-	LINC02254	Deneault et al.
chr15	102166653	102172678	L1PA2:L1:LINE	+	Intronic	chr15	102161647	102182048	-	TM2D3	Deneault et al.
chr16	18832575	18838378	L1HS:L1:LINE	-	Intronic	chr16	18830976	18839352	-	SMG1	Deneault et al.
chr16	50377250	50383321	L1PA5:L1:LINE	+	Intronic	chr16	50373997	50383933	-	BRD7	Deneault et al.
chr16	82172856	82178863	L1PA2:L1:LINE	+	Intronic	chr16	82132139	82173236	-	AC092142.1	Deneault et al.
chr17	58958801	58964835	L1PA2:L1:LINE	-	Intronic	chr17	58952099	58967055	+	BCAS3	Deneault et al.
chr18	53382715	53388760	L1PA2:L1:LINE	-	Intronic	chr18	53303188	53443957	+	AC022031.2	Deneault et al.
chr18	60573525	60579547	L1HS:L1:LINE	+	Intronic	chr18	60572517	60582145	+	PHLPP1	Deneault et al.
chr18	75127932	75133958	L1PA3:L1:LINE	-	Intronic	chr18	75133575	75273000	+	AC124254.2	Deneault et al.
chr19	12017069	12022645	L1PA5:L1:LINE	+	Intronic	chr19	12015702	12024223	+	ZNF69	Deneault et al.
chr19	12115626	12121630	L1PA3:L1:LINE	-	Intronic	chr19	12112637	12125531	+	ZNF433-AS1	Deneault et al.
chr19	12115626	12121630	L1PA3:L1:LINE	-	Intronic	chr19	12112637	12125531	+	AC008770.4	Deneault et al.
chr19	20990530	20996633	L1PA3:L1:LINE	+	Intronic	chr19	20977403	20992801	+	ZNF66	Deneault et al.
chr19	28186346	28192495	L1PA4:L1:LINE	-	Intronic	chr19	28171980	28221180	-	LINC00662	Deneault et al.
chr19	40543822	40549961	L1PA4:L1:LINE	-	Intronic	chr19	40542533	40553281	-	ZNF780B	Deneault et al.
chr19	44473800	44478910	L1PA11:L1:LINE	+	Intronic	chr19	44472014	44488321	+	ZNF155	Deneault et al.
chr2	24318027	24324128	L1PA6:L1:LINE	+	Intronic	chr2	24308085	24338243	+	FAM228B	Deneault et al.
chr2	71638604	71644631	L1HS:L1:LINE	-	Intronic	chr2	71635377	71645731	+	ZNF638	Deneault et al.
chr2	95758488	95764597	L1PA6:L1:LINE	+	Intronic	chr2	95756267	95766218	-	MRPS5	Deneault et al.
chr2	118681259	118686848	L1PA4:L1:LINE	+	Intronic	chr2	118677972	118688612	+	HTR5BP	Deneault et al.
chr2	118681259	118686848	L1PA4:L1:LINE	+	Intronic	chr2	118677972	118688612	-	CCDC93	Deneault et al.
chr2	170105133	170111166	L1HS:L1:LINE	+	Intronic	chr2	170104025	170112615	-	LRP2	Deneault et al.
chr2	186284161	186290189	L1PA2:L1:LINE	-	Intronic	chr2	186289790	186370335	+	AC009315.1	Deneault et al.
chr2	197770311	197776343	L1HS:L1:LINE	+	Intronic	chr2	197767466	197777605	-	PGAP1	Deneault et al.
chr20	8575748	8581774	L1PA2:L1:LINE	-	Intronic	chr20	8352097	8608940	+	PLCB1	Deneault et al.
chr20	33659086	33665195	L1PA5:L1:LINE	-	Intronic	chr20	33657215	33665848	-	TRPC4AP	Deneault et al.
chr20	44100759	44107254	L1PA13:L1:LINE	-	Intronic	chr20	44099172	44108581	+	WFDC2	Deneault et al.
chr20	52072101	52078105	L1PA3:L1:LINE	-	Intronic	chr20	52069597	52103682	-	AL354993.2	Deneault et al.
chr20	52072101	52078105	L1PA3:L1:LINE	-	Intronic	chr20	52017772	52103682	-	AL109930.1	Deneault et al.
chr20	52072101	52078105	L1PA3:L1:LINE	-	Intronic	chr20	52017772	52103682	+	TSHZ2	Deneault et al.
chr20	52120390	52126413	L1PA2:L1:LINE	+	Exonic	chr20	52120647	52120860	-	RP4-669H2.1	Deneault et al.
chr21	35297926	35303910	L1PA2:L1:LINE	-	Exonic	chr21	35303515	35304046	+	LINC00649	Deneault et al.
chr3	15433014	15439121	L1PA4:L1:LINE	-	Intronic	chr3	15422782	15451376	-	METTL6	Deneault et al.
chr3	27857474	27863474	L1PA7:L1:LINE	-	Intronic	chr3	27839043	27872378	+	LINC01980	Deneault et al.
chr3	43607314	43613339	L1PA2:L1:LINE	+	Exonic	chr3	43607144	43607219	-	ANO10	Deneault et al.
chr3	51681874	51687951	L1PA6:L1:LINE	+	Intronic	chr3	51680497	51689986	+	RAD54L2	Deneault et al.
chr3	58827880	58833905	L1PA2:L1:LINE	+	Intronic	chr3	58817615	58849283	-	C3orf67	Deneault et al.
chr3	58827880	58833905	L1PA2:L1:LINE	+	Intronic	chr3	58817615	58849283	+	C3orf67-AS1	Deneault et al.
chr3	108374358	108380495	L1PA4:L1:LINE	+	Intronic	chr3	108373157	108380723	+	DZIP3	Deneault et al.
chr3	134971056	134977072	L1PA2:L1:LINE	-	Intronic	chr3	134968333	134977853	+	EPHB1	Deneault et al.
chr3	134971056	134977072	L1PA2:L1:LINE	-	Intronic	chr3	134968333	134977853	-	AC092969.1	Deneault et al.
chr4	159638	165778	L1PA4:L1:LINE	-	Intronic	chr4	156490	196092	+	ZNF718	Deneault et al.
chr4	20740248	20746401	L1PA5:L1:LINE	+	Intronic	chr4	20736358	20751284	+	PACRGL	Deneault et al.
chr4	20740248	20746401	L1PA5:L1:LINE	+	Intronic	chr4	20736358	20751284	-	KCNIP4	Deneault et al.
chr4	21771611	21778019	L1PA8A:L1:LINE	-	Intronic	chr4	21699318	21844963	-	KCNIP4	Deneault et al.
chr4	42043774	42050256	L1PA7:L1:LINE	+	Intronic	chr4	42041070	42051393	+	SLC30A9	Deneault et al.
chr4	62609439	62615587	L1PA3:L1:LINE	+	Intronic	chr4	62599272	62679526	+	ADGRL3	Deneault et al.
chr4	62620336	62626523	L1PA4:L1:LINE	-	Intronic	chr4	62599272	62679526	+	ADGRL3	Deneault et al.
chr4	62805645	62811680	L1HS:L1:LINE	-	Intronic	chr4	62801763	62812631	+	ADGRL3	Deneault et al.
chr4	87645970	87652087	L1PA6:L1:LINE	-	Intronic	chr4	87643587	87653552	+	PTPN13	Deneault et al.
chr4	91596877	91602908	L1HS:L1:LINE	-	Intronic	chr4	91549383	91645064	+	CCSER1	Deneault et al.
chr4	104171422	104177447	L1PA2:L1:LINE	-	Intronic	chr4	104176979	104375824	+	LINC02428	Deneault et al.
chr4	128638142	128644524	L1PA10:L1:LINE	-	Intronic	chr4	128637934	128647892	+	INTU	Deneault et al.
chr4	151192064	151198580	L1PA7:L1:LINE	+	Intronic	chr4	151186964	151199004	-	LRBA	Deneault et al.
chr4	167664640	167670800	L1PA5:L1:LINE	+	Intronic	chr4	167663210	167675658	-	SPOCK3	Deneault et al.
chr5	74002130	74008268	L1PA3:L1:LINE	+	Intronic	chr5	74001145	74009330	+	HEXB	Deneault et al.
chr5	77414039	77420179	L1PA4:L1:LINE	+	Intronic	chr5	77412058	77423853	-	AP3B1	Deneault et al.
chr5	77748008	77754033	L1PA2:L1:LINE	-	Intronic	chr5	77745857	77755067	+	SCAMP1	Deneault et al.
chr5	139831619	139837446	L1PA5:L1:LINE	+	Intronic	chr5	139828890	139838209	+	ANKHD1-EIF4EBP3	Deneault et al.
chr5	139831619	139837446	L1PA5:L1:LINE	+	Intronic	chr5	139828890	139838209	+	ANKHD1	Deneault et al.
chr5	150122399	150128512	L1PA3:L1:LINE	+	Intronic	chr5	150121719	150133040	-	DCTN4	Deneault et al.
chr6	8770704	8776745	L1PA2:L1:LINE	-	Intronic	chr6	8712526	9294366	+	HULC	Deneault et al.
chr6	18228620	18234510	L1PA5:L1:LINE	+	Intronic	chr6	18226473	18236682	-	DEK	Deneault et al.
chr6	76609458	76615462	L1PA3:L1:LINE	-	Intronic	chr6	76608128	76617321	+	MYO6	Deneault et al.
chr6	79681232	79687246	L1PA3:L1:LINE	+	Intronic	chr6	79680605	79688308	-	PHIP	Deneault et al.
chr6	91271827	91277941	L1PA5:L1:LINE	+	Intronic	chr6	91271386	91278276	-	MAP3K7	Deneault et al.
chr6	98242519	98248408	L1PA4:L1:LINE	+	Intronic	chr6	98156726	98472406	+	AL589740.1	Deneault et al.
chr6	116959859	116965997	L1PA3:L1:LINE	+	Intronic	chr6	116957042	116966876	-	ZUP1	Deneault et al.
chr6	144172713	144178208	L1PA7:L1:LINE	-	Exonic	chr6	144175205	144177090	+	AX746989	Deneault et al.
chr7	12536837	12542864	L1PA3:L1:LINE	+	Intronic	chr7	12509247	12581848	+	AC013470.2	Deneault et al.
chr7	17846287	17852748	L1PA7:L1:LINE	+	Intronic	chr7	17843203	17854456	-	SNX13	Deneault et al.
chr7	39047127	39053152	L1PA2:L1:LINE	-	Exonic	chr7	39053012	39053161	-	POU6F2-AS2	Deneault et al.
chr7	86669072	86675084	L1PA2:L1:LINE	+	Intronic	chr7	86594340	86688640	-	KIAA1324L	Deneault et al.
chr7	91813070	91819192	L1PA3:L1:LINE	-	Intronic	chr7	91809228	91828282	-	AC000120.3	Deneault et al.
chr7	92971276	92977292	L1PA3:L1:LINE	+	Intronic	chr7	92970887	92978022	+	VPS50	Deneault et al.
chr7	131000000	131006360	L1PA8:L1:LINE	+	Intronic	chr7	130995982	131008123	-	MKLN1-AS	Deneault et al.
chr7	131000000	131006360	L1PA8:L1:LINE	+	Intronic	chr7	130995982	131008123	+	MKLN1	Deneault et al.
chr7	138215994	138222113	L1PA5:L1:LINE	-	Intronic	chr7	138213975	138223401	+	TRIM24	Deneault et al.
chr8	11672377	11678511	L1PA6:L1:LINE	-	Intronic	chr8	11667359	11679258	+	FDFT1	Deneault et al.
chr8	43038791	43044885	L1PA5:L1:LINE	-	Intronic	chr8	43037403	43046616	+	HGSNAT	Deneault et al.
chr8	63885234	63891726	L1PA7:L1:LINE	-	Exonic	chr8	63890419	63897460	+	UG0898H09	Deneault et al.
chr8	70755535	70761658	L1PA5:L1:LINE	+	Intronic	chr8	70747299	70767206	+	AC079089.1	Deneault et al.
chr8	73968584	73974141	L1PA6:L1:LINE	+	Intronic	chr8	73964413	73975296	+	AC022893.1	Deneault et al.
chr8	91057493	91063412	L1PA5:L1:LINE	+	Intronic	chr8	91057223	91063904	+	DECR1	Deneault et al.
chr8	103329168	103335319	L1PA3:L1:LINE	+	Intronic	chr8	103327081	103335538	-	UBR5	Deneault et al.
chr9	8324107	8330317	L1PA7:L1:LINE	-	Intronic	chr9	8319966	8331581	-	PTPRD	Deneault et al.
chr9	42690271	42696344	L1PA3:L1:LINE	-	Intronic	chr9	42689878	42700960	+	CBWD7	Deneault et al.
chr9	70199709	70205784	L1PA3:L1:LINE	+	Intronic	chr9	70195743	70216621	-	CBWD4P	Deneault et al.
chr9	70450620	70456693	L1PA3:L1:LINE	+	Intronic	chr9	70446004	70457086	-	CBWD5	Deneault et al.
chr9	72049710	72055847	L1PA4:L1:LINE	-	Exonic	chr9	72055911	72056031	-	APBA1	Deneault et al.
chr9	89656797	89662815	L1PA3:L1:LINE	+	Exonic	chr9	89656785	89657041	-	LINC02893	Deneault et al.
chr9	94976690	94982694	L1PA2:L1:LINE	+	Intronic	chr9	94973171	94984801	-	IARS	Deneault et al.
chr9	96875817	96881847	L1HS:L1:LINE	-	Intronic	chr9	96878305	96907975	-	AL360020.1	Deneault et al.
chr9	115750430	115756749	L1PA10:L1:LINE	-	Intronic	chr9	115720002	115759399	-	ZNF883	Deneault et al.
chrX	11725368	11731399	L1HS:L1:LINE	+	Intronic	chrX	11686521	11775837	-	AC004554.2	Deneault et al.
chrX	67744363	67750771	L1PA7:L1:LINE	-	Intronic	chrX	67742759	67751722	+	YIPF6	Deneault et al.
chrX	73253778	73259910	L1PA5:L1:LINE	-	Intronic	chrX	73251675	73290243	+	JPX	Deneault et al.
chrX	73253778	73259910	L1PA5:L1:LINE	-	Intronic	chrX	73251675	73421436	-	FTX	Deneault et al.
chrX	73260445	73266814	L1PA7:L1:LINE	-	Intronic	chrX	73251675	73290243	+	JPX	Deneault et al.
chrX	73260445	73266814	L1PA7:L1:LINE	-	Intronic	chrX	73251675	73421436	-	FTX	Deneault et al.
chrX	73291824	73297937	L1PA8:L1:LINE	-	Intronic	chrX	73251675	73421436	-	FTX	Deneault et al.
chrX	128374838	128380974	L1PA4:L1:LINE	+	Intronic	chrX	127186382	128460684	-	AL008633.1	Deneault et al.
chrX	130712654	130718709	L1PA2:L1:LINE	+	Intronic	chrX	130678974	130712873	-	IGSF1	Deneault et al.
chrX	130712654	130718709	L1PA2:L1:LINE	+	Intronic	chrX	130712655	130745686	+	AL365256.1	Deneault et al.
chrX	154711018	154716239	L1PA13:L1:LINE	-	Exonic	chrX	154716243	154716707	+	RP11-218L14.4	Deneault et al.
chrY	14959405	14965588	L1PA6:L1:LINE	-	Intronic	chrY	14959252	14968264	+	USP9Y	Deneault et al.
chr1	68553278	68559388	L1PA6:L1:LINE	-	Intronic	chr1	68537556	68564141	+	GNG12-AS1	Velmeshev et al.
chr1	92853959	92860042	L1PA7:L1:LINE	+	Intronic	chr1	92853732	92867613	+	RPAP2	Velmeshev et al.
chr1	116594534	116600673	L1PA3:L1:LINE	+	Intronic	chr1	116580009	116605382	+	SLC22A15	Velmeshev et al.
chr1	121143307	121149329	L1PA3:L1:LINE	+	Intronic	chr1	121138614	121205362	+	LINC02798	Velmeshev et al.
chr1	149923964	149930070	L1PA5:L1:LINE	-	Intronic	chr1	149922124	149931602	-	OTUD7B	Velmeshev et al.
chr1	211127241	211133387	L1PA6:L1:LINE	-	Intronic	chr1	211093411	211192124	-	KCNH1	Velmeshev et al.
chr1	211127241	211133387	L1PA6:L1:LINE	-	Intronic	chr1	211093411	211192124	-	AL590132.1	Velmeshev et al.
chr1	220814954	220821404	L1PA10:L1:LINE	+	Intronic	chr1	220809368	220823961	+	MARK1	Velmeshev et al.
chr1	237238564	237244593	L1HS:L1:LINE	+	Intronic	chr1	237205869	237284106	+	RYR2	Velmeshev et al.
chr1	237983521	237989950	L1PA7:L1:LINE	+	Intronic	chr1	237982492	237991680	+	RYR2	Velmeshev et al.
chr10	49580263	49585413	L1PA7:L1:LINE	+	Intronic	chr10	49514682	49609654	+	MAPK8	Velmeshev et al.
chr10	93263020	93269044	L1PA2:L1:LINE	+	Intronic	chr10	93261091	93272020	+	HECTD2	Velmeshev et al.
chr10	96865055	96871181	L1PA6:L1:LINE	-	Intronic	chr10	96868893	96928182	-	AL157834.1	Velmeshev et al.
chr10	102166087	102172241	L1PA4:L1:LINE	+	Intronic	chr10	102148116	102213800	+	OLMALINC	Velmeshev et al.
chr10	118692681	118699122	L1PA7:L1:LINE	-	Intronic	chr10	118689513	118699976	-	SHTN1	Velmeshev et al.
chr11	14799221	14805319	L1PA5:L1:LINE	+	Intronic	chr11	14793533	14807982	+	PDE3B	Velmeshev et al.
chr11	40866705	40873141	L1PA7:L1:LINE	-	Intronic	chr11	40669828	41144456	-	LRRC4C	Velmeshev et al.
chr11	83223566	83229707	L1PA4:L1:LINE	-	Intronic	chr11	83195271	83243750	-	DLG2	Velmeshev et al.
chr11	113094669	113100816	L1PA5:L1:LINE	+	Intronic	chr11	113092047	113101917	+	NCAM1	Velmeshev et al.
chr11	132190054	132196077	L1PA4:L1:LINE	+	Intronic	chr11	132184597	132200046	+	NTM	Velmeshev et al.
chr11	132626675	132633167	L1PA7:L1:LINE	-	Intronic	chr11	132527214	132812820	-	OPCML	Velmeshev et al.
chr12	4781112	4787459	L1PA7:L1:LINE	+	Intronic	chr12	4778983	4791370	+	AC005833.1	Velmeshev et al.
chr12	4781112	4787459	L1PA7:L1:LINE	+	Intronic	chr12	4778983	4791370	+	NDUFA9	Velmeshev et al.
chr12	8453664	8459778	L1PA4:L1:LINE	-	Intronic	chr12	8395743	8494644	+	AC092745.5	Velmeshev et al.
chr12	8453664	8459778	L1PA4:L1:LINE	-	Intronic	chr12	8407123	8461451	-	ENPP7P5	Velmeshev et al.
chr12	8453664	8459778	L1PA4:L1:LINE	-	Intronic	chr12	8448582	8509559	-	LINC00937	Velmeshev et al.
chr12	46583731	46589869	L1PA6:L1:LINE	-	Intronic	chr12	46582854	46591502	-	SLC38A1	Velmeshev et al.
chr12	62501773	62508228	L1PA7:L1:LINE	-	Intronic	chr12	62261207	62585039	-	TAFA2	Velmeshev et al.
chr12	78047744	78053902	L1PA3:L1:LINE	+	Intronic	chr12	77718421	78225068	+	NAV3	Velmeshev et al.
chr13	36582366	36588374	L1PA2:L1:LINE	-	Intronic	chr13	36521594	36639746	-	DCLK1	Velmeshev et al.
chr13	49039691	49045702	L1HS:L1:LINE	+	Intronic	chr13	49039504	49047495	+	RB1	Velmeshev et al.
chr14	32929548	32935960	L1PA8:L1:LINE	+	Intronic	chr14	32903023	32954301	+	AKAP6	Velmeshev et al.
chr14	67169341	67174507	L1PA8A:L1:LINE	+	Intronic	chr14	67147903	67243181	+	GPHN	Velmeshev et al.
chr15	20616749	20622251	L1PA4:L1:LINE	-	Intronic	chr15	20588709	20636345	-	HERC2P3	Velmeshev et al.
chr15	25500760	25506894	L1PA5:L1:LINE	+	Intronic	chr15	25497480	25509673	+	SNHG14	Velmeshev et al.
chr15	25500760	25506894	L1PA5:L1:LINE	+	Intronic	chr15	25500726	25502174	+	AC124303.1	Velmeshev et al.
chr15	28399917	28406027	L1PA5:L1:LINE	-	Intronic	chr15	28397976	28408239	-	HERC2	Velmeshev et al.
chr15	31919293	31925475	L1PA4:L1:LINE	-	Intronic	chr15	31862400	31947298	-	OTUD7A	Velmeshev et al.
chr15	63909208	63914241	L1PA4:L1:LINE	-	Intronic	chr15	63908881	63915013	-	HERC1	Velmeshev et al.
chr17	49973441	49978975	L1PA15:L1:LINE	-	Intronic	chr17	49825178	50008349	-	CA10	Velmeshev et al.
chr17	59187590	59193599	L1PA2:L1:LINE	+	Intronic	chr17	59161925	59445687	+	BCAS3	Velmeshev et al.
chr18	3695243	3700586	L1PA7:L1:LINE	-	Intronic	chr18	3608323	3729134	-	DLGAP1	Velmeshev et al.
chr18	60573525	60579547	L1HS:L1:LINE	+	Intronic	chr18	60572517	60582145	+	PHLPP1	Velmeshev et al.
chr19	30043256	30048324	L1PA7:L1:LINE	+	Intronic	chr19	30021197	30054752	+	VSTM2B	Velmeshev et al.
chr19	40543822	40549961	L1PA4:L1:LINE	-	Intronic	chr19	40542533	40553281	-	ZNF780B	Velmeshev et al.
chr19	44473800	44478910	L1PA11:L1:LINE	+	Intronic	chr19	44472014	44488321	+	ZNF155	Velmeshev et al.
chr2	24318027	24324128	L1PA6:L1:LINE	+	Intronic	chr2	24308085	24338243	+	FAM228B	Velmeshev et al.
chr2	40459740	40465767	L1PA2:L1:LINE	-	Intronic	chr2	40405633	40478823	+	SLC8A1-AS1	Velmeshev et al.
chr2	40459740	40465767	L1PA2:L1:LINE	-	Intronic	chr2	40405633	40478823	-	SLC8A1	Velmeshev et al.
chr2	142199998	142206420	L1PA7:L1:LINE	-	Intronic	chr2	142012210	142237964	-	LRP1B	Velmeshev et al.
chr2	149138172	149143692	L1PA4:L1:LINE	+	Intronic	chr2	149099905	149215771	+	MBD5	Velmeshev et al.
chr2	197386208	197392224	L1PA2:L1:LINE	-	Intronic	chr2	197298182	197457187	-	HECW2	Velmeshev et al.
chr2	198882661	198889133	L1PA7:L1:LINE	+	Intronic	chr2	198670063	198948481	+	PLCL1	Velmeshev et al.
chr2	210352719	210359164	L1PA7:L1:LINE	+	Intronic	chr2	210288782	210444402	+	MAP2	Velmeshev et al.
chr3	15433014	15439121	L1PA4:L1:LINE	-	Intronic	chr3	15422782	15451376	-	METTL6	Velmeshev et al.
chr3	21596708	21603100	L1PA7:L1:LINE	-	Intronic	chr3	21552515	21606065	-	ZNF385D	Velmeshev et al.
chr3	21596708	21603100	L1PA7:L1:LINE	-	Intronic	chr3	21584281	21606065	+	ZNF385D-AS1	Velmeshev et al.
chr3	51236479	51242602	L1PA3:L1:LINE	+	Intronic	chr3	51198133	51246204	+	DOCK3	Velmeshev et al.
chr3	85202221	85208004	L1PA3:L1:LINE	+	Intronic	chr3	85008819	85434859	+	CADM2	Velmeshev et al.
chr3	85339080	85345090	L1PA2:L1:LINE	+	Intronic	chr3	85008819	85434859	+	CADM2	Velmeshev et al.
chr3	108374358	108380495	L1PA4:L1:LINE	+	Intronic	chr3	108373157	108380723	+	DZIP3	Velmeshev et al.
chr3	115922232	115928273	L1PA2:L1:LINE	-	Intronic	chr3	115816277	116163723	-	LSAMP	Velmeshev et al.
chr3	118720317	118726337	L1PA2:L1:LINE	-	Intronic	chr3	118667088	118753377	-	IGSF11	Velmeshev et al.
chr3	120886334	120892170	L1PA7:L1:LINE	+	Intronic	chr3	120876474	120924769	+	STXBP5L	Velmeshev et al.
chr3	125568653	125574805	L1PA4:L1:LINE	+	Intronic	chr3	125567066	125628215	+	ENPP7P4	Velmeshev et al.
chr3	125568653	125574805	L1PA4:L1:LINE	+	Intronic	chr3	125509395	125571779	+	AC092902.4	Velmeshev et al.
chr3	125568653	125574805	L1PA4:L1:LINE	+	Intronic	chr3	125546081	125635227	-	LINC02614	Velmeshev et al.
chr3	150959560	150965560	L1PA2:L1:LINE	+	Intronic	chr3	150937430	150996074	+	MED12L	Velmeshev et al.
chr3	150959560	150965560	L1PA2:L1:LINE	+	Intronic	chr3	150937430	150996074	-	P2RY14	Velmeshev et al.
chr3	159140855	159146997	L1PA3:L1:LINE	+	Intronic	chr3	159000523	159482231	+	IQCJ-SCHIP1	Velmeshev et al.
chr3	159208911	159215050	L1PA4:L1:LINE	+	Intronic	chr3	159000523	159482231	+	IQCJ-SCHIP1	Velmeshev et al.
chr4	21771611	21778019	L1PA8A:L1:LINE	-	Intronic	chr4	21699318	21844963	-	KCNIP4	Velmeshev et al.
chr4	86991543	86997572	L1PA2:L1:LINE	-	Intronic	chr4	86989108	87019676	-	MAPK10	Velmeshev et al.
chr4	87108935	87115354	L1PA7:L1:LINE	-	Intronic	chr4	87080620	87115488	-	MAPK10	Velmeshev et al.
chr4	87108935	87115354	L1PA7:L1:LINE	-	Intronic	chr4	87080620	87115488	+	AC104827.1	Velmeshev et al.
chr4	88404240	88410700	L1PA7:L1:LINE	-	Intronic	chr4	88403712	88411424	-	SPARCL1	Velmeshev et al.
chr4	144672901	144679319	L1PA7:L1:LINE	+	Intronic	chr4	144621828	144792018	+	AC107223.1	Velmeshev et al.
chr5	88089473	88095205	L1PA7:L1:LINE	-	Intronic	chr5	88057145	88100414	-	MEF2C	Velmeshev et al.
chr5	90090501	90096897	L1PA7:L1:LINE	+	Intronic	chr5	90087163	90098555	+	ADGRV1	Velmeshev et al.
chr5	129343000	129348122	L1PA15:L1:LINE	+	Intronic	chr5	129244053	129519921	+	CHSY3	Velmeshev et al.
chr5	136753492	136759608	L1PA4:L1:LINE	-	Intronic	chr5	136602744	136834061	-	SPOCK1	Velmeshev et al.
chr5	138341143	138347175	L1PA2:L1:LINE	-	Intronic	chr5	138287573	138356859	-	SIL1	Velmeshev et al.
chr5	139895099	139900527	L1PA3:L1:LINE	+	Intronic	chr5	139893064	139903650	+	ANKHD1-EIF4EBP3	Velmeshev et al.
chr5	139895099	139900527	L1PA3:L1:LINE	+	Intronic	chr5	139893064	139903650	+	ANKHD1	Velmeshev et al.
chr7	69662314	69668343	L1HS:L1:LINE	+	Intronic	chr7	69599557	69900737	+	AUTS2	Velmeshev et al.
chr7	78859110	78865127	L1PA2:L1:LINE	-	Intronic	chr7	78641593	79082272	-	MAGI2	Velmeshev et al.
chr7	92971276	92977292	L1PA3:L1:LINE	+	Intronic	chr7	92970887	92978022	+	VPS50	Velmeshev et al.
chr8	4426645	4432101	L1PA7:L1:LINE	-	Intronic	chr8	4277587	4494863	-	CSMD1	Velmeshev et al.
chr8	73968584	73974141	L1PA6:L1:LINE	+	Intronic	chr8	73964413	73975296	+	AC022893.1	Velmeshev et al.
chr8	89586322	89592459	L1PA4:L1:LINE	+	Intronic	chr8	89339717	89899802	+	AC090578.1	Velmeshev et al.
chr8	91057493	91063412	L1PA5:L1:LINE	+	Intronic	chr8	91057223	91063904	+	DECR1	Velmeshev et al.
chr8	107572952	107579352	L1PA7:L1:LINE	+	Intronic	chr8	107531367	107691437	+	OXR1	Velmeshev et al.
chr8	107572952	107579352	L1PA7:L1:LINE	+	Intronic	chr8	107532702	107669776	-	AC090579.1	Velmeshev et al.
chr9	8324107	8330317	L1PA7:L1:LINE	-	Intronic	chr9	8319966	8331581	-	PTPRD	Velmeshev et al.
chr9	19536198	19542228	L1PA2:L1:LINE	-	Intronic	chr9	19528136	19550134	-	SLC24A2	Velmeshev et al.
chr9	19762111	19767759	L1PA7:L1:LINE	-	Intronic	chr9	19622297	19785934	-	SLC24A2	Velmeshev et al.
chr9	72049710	72055847	L1PA4:L1:LINE	-	Intronic	chr9	72047592	72055911	-	APBA1	Velmeshev et al.
chr9	115750430	115756749	L1PA10:L1:LINE	-	Intronic	chr9	115720002	115759399	-	ZNF883	Velmeshev et al.
chrX	11940621	11946326	L1PA13:L1:LINE	+	Intronic	chrX	11840542	12072942	+	FRMPD4	Velmeshev et al.
chrX	73253778	73259910	L1PA5:L1:LINE	-	Intronic	chrX	73251675	73290243	+	JPX	Velmeshev et al.
chrX	73253778	73259910	L1PA5:L1:LINE	-	Intronic	chrX	73251675	73421436	-	FTX	Velmeshev et al.
chrX	73260445	73266814	L1PA7:L1:LINE	-	Intronic	chrX	73251675	73290243	+	JPX	Velmeshev et al.
chrX	73260445	73266814	L1PA7:L1:LINE	-	Intronic	chrX	73251675	73421436	-	FTX	Velmeshev et al.
chrX	73291824	73297937	L1PA8:L1:LINE	-	Intronic	chrX	73251675	73421436	-	FTX	Velmeshev et al.
chrX	91274767	91281191	L1PA13:L1:LINE	+	Intronic	chrX	91134272	91354535	+	PCDH11X	Velmeshev et al.
chrX	154711018	154716239	L1PA13:L1:LINE	-	Intronic	chrX	154704262	154716243	+	TMLHE-AS1	Velmeshev et al.
chrX	154711018	154716239	L1PA13:L1:LINE	-	Intronic	chrX	154704262	154716243	+	BX571846.1	Velmeshev et al.

## Sheet: Table S13. Upregulated L1 - gene pairs
L1_chr	L1_start	L1_end	L1_ID	L1_strand	L1_genomic_localization	Gene_chr	Gene_start	Gene_end	Gene_name	Gene_strand	Gene_info	Sample	Dataset	Tissue/KO_gene
chr1	149923964	149930070	L1PA5:L1:LINE	-	Intronic	chr1	149931602	149931715	OTUD7B	-	Non-DE	SRR6368548	Deneault et al. - iPSC	AFF2
chr10	33201104	33207283	L1PA5:L1:LINE	+	Exonic	chr10	33200813	33201052	ITGB1	-	Up-regulated	SRR6368548	Deneault et al. - iPSC	AFF2
chr10	33201104	33207283	L1PA5:L1:LINE	+	Exonic	chr10	33200813	33201052	ITGB1	-	Up-regulated	SRR6368549	Deneault et al. - iPSC	AFF2
chr11	2655404	2661585	L1PA5:L1:LINE	-	Exonic	chr11	2629557	2721228	KCNQ1OT1	-	Non-DE	SRR6368549	Deneault et al. - iPSC	AFF2
chr11	77037749	77042841	L1PA4:L1:LINE	+	Intronic	chr11	77043774	77043912	PAK1	-	Non-DE	SRR6368549	Deneault et al. - iPSC	AFF2
chr11	77037749	77042841	L1PA4:L1:LINE	+	Intronic	chr11	77043774	77043912	PAK1	-	Non-DE	SRR6368548	Deneault et al. - iPSC	AFF2
chr11	95169380	95175410	L1HS:L1:LINE	+	Intergenic	chr11	95257193	95257298	5S_rRNA	-	Non-DE	SRR6368549	Deneault et al. - iPSC	AFF2
chr11	95169380	95175410	L1HS:L1:LINE	+	Intergenic	chr11	95257193	95257298	5S_rRNA	-	Non-DE	SRR6368548	Deneault et al. - iPSC	AFF2
chr11	102239897	102245923	L1PA2:L1:LINE	-	Intronic	chr11	102239036	102239279	BIRC2	+	Non-DE	SRR6368549	Deneault et al. - iPSC	AFF2
chr12	5225592	5231594	L1PA2:L1:LINE	-	Intergenic	chr12	5153084	5155954	KCNA5	+	Non-DE	SRR6368548	Deneault et al. - iPSC	AFF2
chr12	5225592	5231594	L1PA2:L1:LINE	-	Intergenic	chr12	5153084	5155954	KCNA5	+	Non-DE	SRR6368549	Deneault et al. - iPSC	AFF2
chr15	25500760	25506894	L1PA5:L1:LINE	+	Intronic	chr15	25509673	25509726	SNORD115-45	+	Non-DE	SRR6368548	Deneault et al. - iPSC	AFF2
chr15	56426816	56432826	L1PA2:L1:LINE	-	Intronic	chr15	56434975	56435098	RFX7	-	Non-DE	SRR6368549	Deneault et al. - iPSC	AFF2
chr15	63909208	63914241	L1PA4:L1:LINE	-	Intronic	chr15	63908628	63908881	HERC1	-	Non-DE	SRR6368548	Deneault et al. - iPSC	AFF2
chr15	63909208	63914241	L1PA4:L1:LINE	-	Intronic	chr15	63908628	63908881	HERC1	-	Non-DE	SRR6368549	Deneault et al. - iPSC	AFF2
chr15	81960854	81966845	L1PA2:L1:LINE	-	Intronic	chr15	81666329	81666418	TMC3	-	Non-DE	SRR6368549	Deneault et al. - iPSC	AFF2
chr15	81960854	81966845	L1PA2:L1:LINE	-	Intronic	chr15	81666329	81666418	TMC3	-	Non-DE	SRR6368548	Deneault et al. - iPSC	AFF2
chr15	97975923	97982079	L1PA3:L1:LINE	+	Intronic	chr15	97896726	97897019	RN7SL677P	+	Non-DE	SRR6368548	Deneault et al. - iPSC	AFF2
chr16	18832575	18838378	L1HS:L1:LINE	-	Intronic	chr16	18839352	18839490	SMG1	-	Non-DE	SRR6368548	Deneault et al. - iPSC	AFF2
chr18	53382715	53388760	L1PA2:L1:LINE	-	Intronic	chr18	53443957	53447261	LINC01415	-	Non-DE	SRR6368548	Deneault et al. - iPSC	AFF2
chr18	53382715	53388760	L1PA2:L1:LINE	-	Intronic	chr18	53443957	53447261	LINC01415	-	Non-DE	SRR6368549	Deneault et al. - iPSC	AFF2
chr20	44100759	44107254	L1PA13:L1:LINE	-	Intronic	chr20	44108581	44108734	WFDC2	+	Non-DE	SRR6368548	Deneault et al. - iPSC	AFF2
chr20	44100759	44107254	L1PA13:L1:LINE	-	Intronic	chr20	44108581	44108734	WFDC2	+	Non-DE	SRR6368549	Deneault et al. - iPSC	AFF2
chr3	51681874	51687951	L1PA6:L1:LINE	+	Intronic	chr3	51680300	51680497	RAD54L2	+	Non-DE	SRR6368548	Deneault et al. - iPSC	AFF2
chr3	134971056	134977072	L1PA2:L1:LINE	-	Intronic	chr3	134977853	134979307	EPHB1	+	Non-DE	SRR6368549	Deneault et al. - iPSC	AFF2
chr3	134971056	134977072	L1PA2:L1:LINE	-	Intronic	chr3	134977853	134979307	EPHB1	+	Non-DE	SRR6368548	Deneault et al. - iPSC	AFF2
chr4	91596877	91602908	L1HS:L1:LINE	-	Intronic	chr4	91645064	91645142	CCSER1	+	Non-DE	SRR6368549	Deneault et al. - iPSC	AFF2
chr4	167664640	167670800	L1PA5:L1:LINE	+	Intronic	chr4	167663147	167663210	SPOCK3	-	Up-regulated	SRR6368548	Deneault et al. - iPSC	AFF2
chr4	167664640	167670800	L1PA5:L1:LINE	+	Intronic	chr4	167663147	167663210	SPOCK3	-	Up-regulated	SRR6368549	Deneault et al. - iPSC	AFF2
chr5	74002130	74008268	L1PA3:L1:LINE	+	Intronic	chr5	74001043	74001145	HEXB	+	Non-DE	SRR6368548	Deneault et al. - iPSC	AFF2
chr6	144172713	144178208	L1PA7:L1:LINE	-	Exonic	chr6	144175205	144177090	AX746989	+	Non-DE	SRR6368548	Deneault et al. - iPSC	AFF2
chr6	144172713	144178208	L1PA7:L1:LINE	-	Exonic	chr6	144175205	144177090	AX746989	+	Non-DE	SRR6368549	Deneault et al. - iPSC	AFF2
chrUn_gl000214	39518	45655	L1PA3:L1:LINE	-	Intergenic	chrUn_gl000214	32576	32635	BC012753	+	Non-DE	SRR6368549	Deneault et al. - iPSC	AFF2
chrUn_gl000214	39518	45655	L1PA3:L1:LINE	-	Intergenic	chrUn_gl000214	32576	32635	BC012753	+	Non-DE	SRR6368548	Deneault et al. - iPSC	AFF2
chr1	117517360	117523487	L1PA5:L1:LINE	+	Intronic	chr1	117516837	117516945	PTGFRN	+	Non-DE	SRR6368533	Deneault et al. - iPSC	ANOS1
chr1	117517360	117523487	L1PA5:L1:LINE	+	Intronic	chr1	117516837	117516945	PTGFRN	+	Non-DE	SRR6368532	Deneault et al. - iPSC	ANOS1
chr1	149923964	149930070	L1PA5:L1:LINE	-	Intronic	chr1	149931602	149931715	OTUD7B	-	Non-DE	SRR6368537	Deneault et al. - iPSC	ANOS1
chr10	33201104	33207283	L1PA5:L1:LINE	+	Exonic	chr10	33200813	33201052	ITGB1	-	Non-DE	SRR6368532	Deneault et al. - iPSC	ANOS1
chr10	86039723	86045762	L1PA2:L1:LINE	+	Exonic	chr10	86039735	86039821	LINC00858	+	Non-DE	SRR6368533	Deneault et al. - iPSC	ANOS1
chr10	86039723	86045762	L1PA2:L1:LINE	+	Exonic	chr10	86039735	86039821	LINC00858	+	Non-DE	SRR6368536	Deneault et al. - iPSC	ANOS1
chr10	118692681	118699122	L1PA7:L1:LINE	-	Intronic	chr10	118699976	118700123	SHTN1	-	Non-DE	SRR6368533	Deneault et al. - iPSC	ANOS1
chr11	77037749	77042841	L1PA4:L1:LINE	+	Intronic	chr11	77043774	77043912	PAK1	-	Up-regulated	SRR6368532	Deneault et al. - iPSC	ANOS1
chr11	77037749	77042841	L1PA4:L1:LINE	+	Intronic	chr11	77043774	77043912	PAK1	-	Up-regulated	SRR6368537	Deneault et al. - iPSC	ANOS1
chr11	77037749	77042841	L1PA4:L1:LINE	+	Intronic	chr11	77043774	77043912	PAK1	-	Up-regulated	SRR6368536	Deneault et al. - iPSC	ANOS1
chr11	77037749	77042841	L1PA4:L1:LINE	+	Intronic	chr11	77043774	77043912	PAK1	-	Up-regulated	SRR6368533	Deneault et al. - iPSC	ANOS1
chr11	102239897	102245923	L1PA2:L1:LINE	-	Intronic	chr11	102239036	102239279	BIRC2	+	Non-DE	SRR6368533	Deneault et al. - iPSC	ANOS1
chr11	108227658	108233694	L1PA2:L1:LINE	+	Intronic	chr11	108225537	108225601	ATM	+	Non-DE	SRR6368537	Deneault et al. - iPSC	ANOS1
chr12	29475994	29481840	L1PA4:L1:LINE	+	Intronic	chr12	29474727	29474857	FAR2	+	Non-DE	SRR6368532	Deneault et al. - iPSC	ANOS1
chr12	48068016	48073191	L1PA6:L1:LINE	+	Exonic	chr12	48073275	48073377	RPAP3	-	Non-DE	SRR6368536	Deneault et al. - iPSC	ANOS1
chr12	48068016	48073191	L1PA6:L1:LINE	+	Exonic	chr12	48073275	48073377	RPAP3	-	Non-DE	SRR6368537	Deneault et al. - iPSC	ANOS1
chr13	77773162	77779196	L1PA3:L1:LINE	+	Intronic	chr13	77779390	77779518	MYCBP2	-	Non-DE	SRR6368537	Deneault et al. - iPSC	ANOS1
chr13	77773162	77779196	L1PA3:L1:LINE	+	Intronic	chr13	77779390	77779518	MYCBP2	-	Non-DE	SRR6368532	Deneault et al. - iPSC	ANOS1
chr13	111321942	111328064	L1PA5:L1:LINE	+	Intronic	chr13	111329320	111329450	CARS2	-	Up-regulated	SRR6368532	Deneault et al. - iPSC	ANOS1
chr13	111321942	111328064	L1PA5:L1:LINE	+	Intronic	chr13	111329320	111329450	CARS2	-	Up-regulated	SRR6368537	Deneault et al. - iPSC	ANOS1
chr13	111321942	111328064	L1PA5:L1:LINE	+	Intronic	chr13	111329320	111329450	CARS2	-	Up-regulated	SRR6368536	Deneault et al. - iPSC	ANOS1
chr14	71545567	71552023	L1PA7:L1:LINE	-	Intronic	chr14	71542905	71543136	PCNX1	+	Non-DE	SRR6368537	Deneault et al. - iPSC	ANOS1
chr15	63909208	63914241	L1PA4:L1:LINE	-	Intronic	chr15	63908628	63908881	HERC1	-	Non-DE	SRR6368537	Deneault et al. - iPSC	ANOS1
chr15	82287507	82293537	L1PA2:L1:LINE	+	Intronic	chr15	82334118	82336954	MEX3B	-	Non-DE	SRR6368537	Deneault et al. - iPSC	ANOS1
chr18	75127932	75133958	L1PA3:L1:LINE	-	Intronic	chr18	74980540	74982096	GALR1	+	Non-DE	SRR6368536	Deneault et al. - iPSC	ANOS1
chr18	75127932	75133958	L1PA3:L1:LINE	-	Intronic	chr18	74980540	74982096	GALR1	+	Non-DE	SRR6368537	Deneault et al. - iPSC	ANOS1
chr2	73948522	73954676	L1PA3:L1:LINE	+	Intergenic	chr2	73956956	73957156	TPRKB	-	Non-DE	SRR6368536	Deneault et al. - iPSC	ANOS1
chr2	73948522	73954676	L1PA3:L1:LINE	+	Intergenic	chr2	73956956	73957156	TPRKB	-	Non-DE	SRR6368537	Deneault et al. - iPSC	ANOS1
chr2	95758488	95764597	L1PA6:L1:LINE	+	Intronic	chr2	95766218	95766281	MRPS5	-	Up-regulated	SRR6368537	Deneault et al. - iPSC	ANOS1
chr2	118681259	118686848	L1PA4:L1:LINE	+	Intronic	chr2	118688612	118688726	CCDC93	-	Non-DE	SRR6368536	Deneault et al. - iPSC	ANOS1
chr20	44100759	44107254	L1PA13:L1:LINE	-	Intronic	chr20	44108581	44108734	WFDC2	+	Non-DE	SRR6368532	Deneault et al. - iPSC	ANOS1
chr3	43607314	43613339	L1PA2:L1:LINE	+	Exonic	chr3	43607144	43607219	ANO10	-	Non-DE	SRR6368532	Deneault et al. - iPSC	ANOS1
chr3	108374358	108380495	L1PA4:L1:LINE	+	Intronic	chr3	108380723	108380819	DZIP3	+	Non-DE	SRR6368532	Deneault et al. - iPSC	ANOS1
chr3	108374358	108380495	L1PA4:L1:LINE	+	Intronic	chr3	108380723	108380819	DZIP3	+	Non-DE	SRR6368537	Deneault et al. - iPSC	ANOS1
chr4	159638	165778	L1PA4:L1:LINE	-	Intronic	chr4	154701	156490	ZNF718	+	Non-DE	SRR6368532	Deneault et al. - iPSC	ANOS1
chr4	159638	165778	L1PA4:L1:LINE	-	Intronic	chr4	154701	156490	ZNF718	+	Non-DE	SRR6368536	Deneault et al. - iPSC	ANOS1
chr4	159638	165778	L1PA4:L1:LINE	-	Intronic	chr4	154701	156490	ZNF718	+	Non-DE	SRR6368536	Deneault et al. - iPSC	ANOS1
chr4	159638	165778	L1PA4:L1:LINE	-	Intronic	chr4	154701	156490	ZNF718	+	Non-DE	SRR6368532	Deneault et al. - iPSC	ANOS1
chr4	159638	165778	L1PA4:L1:LINE	-	Intronic	chr4	154701	156490	ZNF718	+	Non-DE	SRR6368537	Deneault et al. - iPSC	ANOS1
chr4	159638	165778	L1PA4:L1:LINE	-	Intronic	chr4	154701	156490	ZNF718	+	Non-DE	SRR6368537	Deneault et al. - iPSC	ANOS1
chr4	159638	165778	L1PA4:L1:LINE	-	Intronic	chr4	154701	156490	ZNF718	+	Non-DE	SRR6368533	Deneault et al. - iPSC	ANOS1
chr4	159638	165778	L1PA4:L1:LINE	-	Intronic	chr4	154701	156490	ZNF718	+	Non-DE	SRR6368533	Deneault et al. - iPSC	ANOS1
chr4	62620336	62626523	L1PA4:L1:LINE	-	Intronic	chr4	62598471	62599272	ADGRL3	+	Non-DE	SRR6368537	Deneault et al. - iPSC	ANOS1
chr4	62620336	62626523	L1PA4:L1:LINE	-	Intronic	chr4	62598471	62599272	ADGRL3	+	Non-DE	SRR6368536	Deneault et al. - iPSC	ANOS1
chr5	139831619	139837446	L1PA5:L1:LINE	+	Intronic	chr5	139838209	139838447	ANKHD1-EIF4EBP3	+	Non-DE	SRR6368536	Deneault et al. - iPSC	ANOS1
chr5	139831619	139837446	L1PA5:L1:LINE	+	Intronic	chr5	139838209	139838447	ANKHD1-EIF4EBP3	+	Non-DE	SRR6368537	Deneault et al. - iPSC	ANOS1
chr6	79681232	79687246	L1PA3:L1:LINE	+	Intronic	chr6	79680497	79680605	PHIP	-	Non-DE	SRR6368537	Deneault et al. - iPSC	ANOS1
chr6	91271827	91277941	L1PA5:L1:LINE	+	Intronic	chr6	91278276	91278342	MAP3K7	-	Non-DE	SRR6368532	Deneault et al. - iPSC	ANOS1
chr6	91271827	91277941	L1PA5:L1:LINE	+	Intronic	chr6	91278276	91278342	MAP3K7	-	Non-DE	SRR6368536	Deneault et al. - iPSC	ANOS1
chr6	91271827	91277941	L1PA5:L1:LINE	+	Intronic	chr6	91278276	91278342	MAP3K7	-	Non-DE	SRR6368537	Deneault et al. - iPSC	ANOS1
chr6	116959859	116965997	L1PA3:L1:LINE	+	Intronic	chr6	116966876	116967097	ZUP1	-	Non-DE	SRR6368537	Deneault et al. - iPSC	ANOS1
chr6	116959859	116965997	L1PA3:L1:LINE	+	Intronic	chr6	116966876	116967097	ZUP1	-	Non-DE	SRR6368533	Deneault et al. - iPSC	ANOS1
chr6	116959859	116965997	L1PA3:L1:LINE	+	Intronic	chr6	116966876	116967097	ZUP1	-	Non-DE	SRR6368532	Deneault et al. - iPSC	ANOS1
chr6	144172713	144178208	L1PA7:L1:LINE	-	Exonic	chr6	144175205	144177090	AX746989	+	Non-DE	SRR6368537	Deneault et al. - iPSC	ANOS1
chr7	86669072	86675084	L1PA2:L1:LINE	+	Intronic	chr7	86688640	86689014	ELAPOR2	-	Non-DE	SRR6368537	Deneault et al. - iPSC	ANOS1
chr7	91813070	91819192	L1PA3:L1:LINE	-	Intronic	chr7	91808164	91809228	CYP51A1-AS1	+	Non-DE	SRR6368536	Deneault et al. - iPSC	ANOS1
chr7	91813070	91819192	L1PA3:L1:LINE	-	Intronic	chr7	91808164	91809228	CYP51A1-AS1	+	Non-DE	SRR6368537	Deneault et al. - iPSC	ANOS1
chr7	138215994	138222113	L1PA5:L1:LINE	-	Intronic	chr7	138223401	138223548	TRIM24	+	Non-DE	SRR6368536	Deneault et al. - iPSC	ANOS1
chr8	11672377	11678511	L1PA6:L1:LINE	-	Intronic	chr8	11679258	11679387	FDFT1	+	Non-DE	SRR6368532	Deneault et al. - iPSC	ANOS1
chr8	11672377	11678511	L1PA6:L1:LINE	-	Intronic	chr8	11679258	11679387	FDFT1	+	Up-regulated	SRR6368536	Deneault et al. - iPSC	ANOS1
chr8	11672377	11678511	L1PA6:L1:LINE	-	Intronic	chr8	11679258	11679387	FDFT1	+	Up-regulated	SRR6368537	Deneault et al. - iPSC	ANOS1
chr8	73968584	73974141	L1PA6:L1:LINE	+	Intronic	chr8	73976777	73979693	SBSPON	-	Non-DE	SRR6368536	Deneault et al. - iPSC	ANOS1
chr8	73968584	73974141	L1PA6:L1:LINE	+	Intronic	chr8	73976777	73979693	SBSPON	-	Non-DE	SRR6368537	Deneault et al. - iPSC	ANOS1
chr8	73968584	73974141	L1PA6:L1:LINE	+	Intronic	chr8	73976777	73979693	SBSPON	-	Up-regulated	SRR6368533	Deneault et al. - iPSC	ANOS1
chr9	8324107	8330317	L1PA7:L1:LINE	-	Intronic	chr9	8331581	8331736	PTPRD	-	Non-DE	SRR6368536	Deneault et al. - iPSC	ANOS1
chr9	94976690	94982694	L1PA2:L1:LINE	+	Intronic	chr9	94984801	94984954	IARS1	-	Non-DE	SRR6368537	Deneault et al. - iPSC	ANOS1
chr9	94976690	94982694	L1PA2:L1:LINE	+	Intronic	chr9	94984801	94984954	IARS1	-	Non-DE	SRR6368536	Deneault et al. - iPSC	ANOS1
chr9	94976690	94982694	L1PA2:L1:LINE	+	Intronic	chr9	94984801	94984954	IARS1	-	Non-DE	SRR6368532	Deneault et al. - iPSC	ANOS1
chrX	128374838	128380974	L1PA4:L1:LINE	+	Intronic	chrX	128580477	128581278	SMARCA1	-	Non-DE	SRR6368532	Deneault et al. - iPSC	ANOS1
chrX	130712654	130718709	L1PA2:L1:LINE	+	Intronic	chrX	130678047	130678974	OR13H1	+	Non-DE	SRR6368537	Deneault et al. - iPSC	ANOS1
chrX	130712654	130718709	L1PA2:L1:LINE	+	Intronic	chrX	130678047	130678974	OR13H1	+	Non-DE	SRR6368536	Deneault et al. - iPSC	ANOS1
chrY	14959405	14965588	L1PA6:L1:LINE	-	Intronic	chrY	14959163	14959252	USP9Y	+	Non-DE	SRR6368537	Deneault et al. - iPSC	ANOS1
chr1	100665158	100671644	L1PA7:L1:LINE	+	Intronic	chr1	100671785	100671857	DBT	-	Non-DE	SRR6368556	Deneault et al. - iPSC	ASTN2
chr1	143125606	143131754	L1PA2:L1:LINE	-	Intronic	chr1	143119060	143119119	RP11-782C8.1	+	Non-DE	SRR6368555	Deneault et al. - iPSC	ASTN2
chr10	33201104	33207283	L1PA5:L1:LINE	+	Exonic	chr10	33200813	33201052	ITGB1	-	Up-regulated	SRR6368556	Deneault et al. - iPSC	ASTN2
chr10	33201104	33207283	L1PA5:L1:LINE	+	Exonic	chr10	33200813	33201052	ITGB1	-	Up-regulated	SRR6368554	Deneault et al. - iPSC	ASTN2
chr10	33201104	33207283	L1PA5:L1:LINE	+	Exonic	chr10	33200813	33201052	ITGB1	-	Up-regulated	SRR6368555	Deneault et al. - iPSC	ASTN2
chr10	33201104	33207283	L1PA5:L1:LINE	+	Exonic	chr10	33200813	33201052	ITGB1	-	Up-regulated	SRR6368557	Deneault et al. - iPSC	ASTN2
chr11	77037749	77042841	L1PA4:L1:LINE	+	Intronic	chr11	77043774	77043912	PAK1	-	Non-DE	SRR6368556	Deneault et al. - iPSC	ASTN2
chr11	77037749	77042841	L1PA4:L1:LINE	+	Intronic	chr11	77043774	77043912	PAK1	-	Up-regulated	SRR6368555	Deneault et al. - iPSC	ASTN2
chr11	102239897	102245923	L1PA2:L1:LINE	-	Intronic	chr11	102239036	102239279	BIRC2	+	Non-DE	SRR6368556	Deneault et al. - iPSC	ASTN2
chr11	102239897	102245923	L1PA2:L1:LINE	-	Intronic	chr11	102239036	102239279	BIRC2	+	Non-DE	SRR6368557	Deneault et al. - iPSC	ASTN2
chr14	55414793	55420840	L1PA5:L1:LINE	+	Intronic	chr14	55422278	55422412	WDHD1	-	Non-DE	SRR6368555	Deneault et al. - iPSC	ASTN2
chr3	108374358	108380495	L1PA4:L1:LINE	+	Intronic	chr3	108380723	108380819	DZIP3	+	Non-DE	SRR6368557	Deneault et al. - iPSC	ASTN2
chr5	74002130	74008268	L1PA3:L1:LINE	+	Intronic	chr5	74001043	74001145	HEXB	+	Up-regulated	SRR6368555	Deneault et al. - iPSC	ASTN2
chr6	116959859	116965997	L1PA3:L1:LINE	+	Intronic	chr6	116966876	116967097	ZUP1	-	Non-DE	SRR6368557	Deneault et al. - iPSC	ASTN2
chr6	116959859	116965997	L1PA3:L1:LINE	+	Intronic	chr6	116966876	116967097	ZUP1	-	Non-DE	SRR6368554	Deneault et al. - iPSC	ASTN2
chrX	128486184	128491941	L1PA5:L1:LINE	+	Intergenic	chrX	128580477	128581278	SMARCA1	-	Non-DE	SRR6368554	Deneault et al. - iPSC	ASTN2
chr1	43580198	43586187	L1PA2:L1:LINE	-	Exonic	chr1	43585818	43585943	FAM183A	+	Non-DE	SRR6368561	Deneault et al. - iPSC	ATRX
chr1	43580198	43586187	L1PA2:L1:LINE	-	Exonic	chr1	43585818	43585943	FAM183A	+	Non-DE	SRR6368560	Deneault et al. - iPSC	ATRX
chr1	43580198	43586187	L1PA2:L1:LINE	-	Exonic	chr1	43585818	43585943	FAM183A	+	Non-DE	SRR6368559	Deneault et al. - iPSC	ATRX
chr1	43580198	43586187	L1PA2:L1:LINE	-	Exonic	chr1	43585818	43585943	FAM183A	+	Non-DE	SRR6368558	Deneault et al. - iPSC	ATRX
chr1	121143307	121149329	L1PA3:L1:LINE	+	Intronic	chr1	121129494	121129827	SRGAP2D	+	Non-DE	SRR6368559	Deneault et al. - iPSC	ATRX
chr1	121143307	121149329	L1PA3:L1:LINE	+	Intronic	chr1	121129494	121129827	SRGAP2D	+	Non-DE	SRR6368558	Deneault et al. - iPSC	ATRX
chr1	121143307	121149329	L1PA3:L1:LINE	+	Intronic	chr1	121129494	121129827	SRGAP2D	+	Non-DE	SRR6368561	Deneault et al. - iPSC	ATRX
chr1	121143307	121149329	L1PA3:L1:LINE	+	Intronic	chr1	121129494	121129827	SRGAP2D	+	Non-DE	SRR6368560	Deneault et al. - iPSC	ATRX
chr1	121316087	121322219	L1PA3:L1:LINE	+	Intronic	chr1	121310573	121313686	EMBP1	+	Non-DE	SRR6368558	Deneault et al. - iPSC	ATRX
chr1	143125606	143131754	L1PA2:L1:LINE	-	Intronic	chr1	143119060	143119119	RP11-782C8.1	+	Non-DE	SRR6368558	Deneault et al. - iPSC	ATRX
chr1	180835947	180841979	L1HS:L1:LINE	-	Intronic	chr1	180842938	180843078	XPR1	+	Non-DE	SRR6368558	Deneault et al. - iPSC	ATRX
chr1	180835947	180841979	L1HS:L1:LINE	-	Intronic	chr1	180842938	180843078	XPR1	+	Non-DE	SRR6368559	Deneault et al. - iPSC	ATRX
chr1	180835947	180841979	L1HS:L1:LINE	-	Intronic	chr1	180842938	180843078	XPR1	+	Non-DE	SRR6368560	Deneault et al. - iPSC	ATRX
chr1	180835947	180841979	L1HS:L1:LINE	-	Intronic	chr1	180842938	180843078	XPR1	+	Non-DE	SRR6368561	Deneault et al. - iPSC	ATRX
chr10	33201104	33207283	L1PA5:L1:LINE	+	Exonic	chr10	33200813	33201052	ITGB1	-	Up-regulated	SRR6368558	Deneault et al. - iPSC	ATRX
chr10	33201104	33207283	L1PA5:L1:LINE	+	Exonic	chr10	33200813	33201052	ITGB1	-	Non-DE	SRR6368559	Deneault et al. - iPSC	ATRX
chr10	33201104	33207283	L1PA5:L1:LINE	+	Exonic	chr10	33200813	33201052	ITGB1	-	Non-DE	SRR6368560	Deneault et al. - iPSC	ATRX
chr10	55253766	55259783	L1PA3:L1:LINE	-	Intergenic	chr10	55580859	55583118	PCDH15	-	Non-DE	SRR6368561	Deneault et al. - iPSC	ATRX
chr10	55253766	55259783	L1PA3:L1:LINE	-	Intergenic	chr10	55580859	55583118	PCDH15	-	Non-DE	SRR6368560	Deneault et al. - iPSC	ATRX
chr10	55253766	55259783	L1PA3:L1:LINE	-	Intergenic	chr10	55580859	55583118	PCDH15	-	Non-DE	SRR6368559	Deneault et al. - iPSC	ATRX
chr10	55253766	55259783	L1PA3:L1:LINE	-	Intergenic	chr10	55580859	55583118	PCDH15	-	Non-DE	SRR6368558	Deneault et al. - iPSC	ATRX
chr10	86039723	86045762	L1PA2:L1:LINE	+	Exonic	chr10	86039735	86039821	LINC00858	+	Non-DE	SRR6368561	Deneault et al. - iPSC	ATRX
chr10	86039723	86045762	L1PA2:L1:LINE	+	Exonic	chr10	86039735	86039821	LINC00858	+	Non-DE	SRR6368558	Deneault et al. - iPSC	ATRX
chr10	86039723	86045762	L1PA2:L1:LINE	+	Exonic	chr10	86039735	86039821	LINC00858	+	Non-DE	SRR6368559	Deneault et al. - iPSC	ATRX
chr10	86039723	86045762	L1PA2:L1:LINE	+	Exonic	chr10	86039735	86039821	LINC00858	+	Non-DE	SRR6368560	Deneault et al. - iPSC	ATRX
chr10	96865055	96871181	L1PA6:L1:LINE	-	Intronic	chr10	96828991	96829254	CYP2C8	-	Non-DE	SRR6368561	Deneault et al. - iPSC	ATRX
chr10	96865055	96871181	L1PA6:L1:LINE	-	Intronic	chr10	96828991	96829254	CYP2C8	-	Non-DE	SRR6368558	Deneault et al. - iPSC	ATRX
chr10	101400324	101406444	L1PA5:L1:LINE	-	Intergenic	chr10	101419262	101419345	ENTPD7	+	Non-DE	SRR6368561	Deneault et al. - iPSC	ATRX
chr10	101400324	101406444	L1PA5:L1:LINE	-	Intergenic	chr10	101419262	101419345	ENTPD7	+	Non-DE	SRR6368558	Deneault et al. - iPSC	ATRX
chr11	3514186	3520281	L1PA4:L1:LINE	-	Intronic	chr11	3429915	3430378	LOC650368	+	Non-DE	SRR6368558	Deneault et al. - iPSC	ATRX
chr11	7679379	7685402	L1PA2:L1:LINE	-	Intergenic	chr11	7686325	7686777	CYB5R2	-	Non-DE	SRR6368560	Deneault et al. - iPSC	ATRX
chr11	7679379	7685402	L1PA2:L1:LINE	-	Intergenic	chr11	7686325	7686777	CYB5R2	-	Non-DE	SRR6368559	Deneault et al. - iPSC	ATRX
chr11	7679379	7685402	L1PA2:L1:LINE	-	Intergenic	chr11	7686325	7686777	CYB5R2	-	Non-DE	SRR6368558	Deneault et al. - iPSC	ATRX
chr11	7679379	7685402	L1PA2:L1:LINE	-	Intergenic	chr11	7686325	7686777	CYB5R2	-	Non-DE	SRR6368561	Deneault et al. - iPSC	ATRX
chr11	14616306	14622422	L1PA6:L1:LINE	-	Intronic	chr11	14665268	14666599	PDE3B	+	Up-regulated	SRR6368558	Deneault et al. - iPSC	ATRX
chr11	43367651	43373668	L1PA2:L1:LINE	-	Intronic	chr11	43363977	43366080	API5	+	Non-DE	SRR6368560	Deneault et al. - iPSC	ATRX
chr11	43367651	43373668	L1PA2:L1:LINE	-	Intronic	chr11	43363977	43366080	API5	+	Non-DE	SRR6368561	Deneault et al. - iPSC	ATRX
chr11	43367651	43373668	L1PA2:L1:LINE	-	Intronic	chr11	43363977	43366080	API5	+	Non-DE	SRR6368559	Deneault et al. - iPSC	ATRX
chr11	43367651	43373668	L1PA2:L1:LINE	-	Intronic	chr11	43363977	43366080	API5	+	Non-DE	SRR6368558	Deneault et al. - iPSC	ATRX
chr11	77037749	77042841	L1PA4:L1:LINE	+	Intronic	chr11	77043774	77043912	PAK1	-	Non-DE	SRR6368560	Deneault et al. - iPSC	ATRX
chr11	95169380	95175410	L1HS:L1:LINE	+	Intergenic	chr11	95257193	95257298	5S_rRNA	-	Non-DE	SRR6368559	Deneault et al. - iPSC	ATRX
chr11	95169380	95175410	L1HS:L1:LINE	+	Intergenic	chr11	95257193	95257298	5S_rRNA	-	Non-DE	SRR6368561	Deneault et al. - iPSC	ATRX
chr11	95169380	95175410	L1HS:L1:LINE	+	Intergenic	chr11	95257193	95257298	5S_rRNA	-	Non-DE	SRR6368560	Deneault et al. - iPSC	ATRX
chr11	95169380	95175410	L1HS:L1:LINE	+	Intergenic	chr11	95257193	95257298	5S_rRNA	-	Non-DE	SRR6368558	Deneault et al. - iPSC	ATRX
chr11	96138784	96144829	L1PA2:L1:LINE	-	Intronic	chr11	96123646	96126727	JRKL	+	Non-DE	SRR6368559	Deneault et al. - iPSC	ATRX
chr11	96138784	96144829	L1PA2:L1:LINE	-	Intronic	chr11	96123646	96126727	JRKL	+	Non-DE	SRR6368558	Deneault et al. - iPSC	ATRX
chr11	96138784	96144829	L1PA2:L1:LINE	-	Intronic	chr11	96123646	96126727	JRKL	+	Non-DE	SRR6368560	Deneault et al. - iPSC	ATRX
chr11	102239897	102245923	L1PA2:L1:LINE	-	Intronic	chr11	102239036	102239279	BIRC2	+	Non-DE	SRR6368558	Deneault et al. - iPSC	ATRX
chr11	102239897	102245923	L1PA2:L1:LINE	-	Intronic	chr11	102239036	102239279	BIRC2	+	Non-DE	SRR6368561	Deneault et al. - iPSC	ATRX
chr11	102239897	102245923	L1PA2:L1:LINE	-	Intronic	chr11	102239036	102239279	BIRC2	+	Non-DE	SRR6368559	Deneault et al. - iPSC	ATRX
chr11	102239897	102245923	L1PA2:L1:LINE	-	Intronic	chr11	102239036	102239279	BIRC2	+	Non-DE	SRR6368560	Deneault et al. - iPSC	ATRX
chr12	4618061	4624067	L1PA2:L1:LINE	+	Intronic	chr12	4626226	4626355	C12orf4	-	Non-DE	SRR6368561	Deneault et al. - iPSC	ATRX
chr12	4618061	4624067	L1PA2:L1:LINE	+	Intronic	chr12	4626226	4626355	C12orf4	-	Non-DE	SRR6368560	Deneault et al. - iPSC	ATRX
chr12	4618061	4624067	L1PA2:L1:LINE	+	Intronic	chr12	4626226	4626355	C12orf4	-	Non-DE	SRR6368558	Deneault et al. - iPSC	ATRX
chr12	4618061	4624067	L1PA2:L1:LINE	+	Intronic	chr12	4626226	4626355	C12orf4	-	Non-DE	SRR6368559	Deneault et al. - iPSC	ATRX
chr12	5225592	5231594	L1PA2:L1:LINE	-	Intergenic	chr12	5153084	5155954	KCNA5	+	Non-DE	SRR6368560	Deneault et al. - iPSC	ATRX
chr12	5225592	5231594	L1PA2:L1:LINE	-	Intergenic	chr12	5153084	5155954	KCNA5	+	Non-DE	SRR6368558	Deneault et al. - iPSC	ATRX
chr12	5225592	5231594	L1PA2:L1:LINE	-	Intergenic	chr12	5153084	5155954	KCNA5	+	Non-DE	SRR6368559	Deneault et al. - iPSC	ATRX
chr12	5225592	5231594	L1PA2:L1:LINE	-	Intergenic	chr12	5153084	5155954	KCNA5	+	Non-DE	SRR6368561	Deneault et al. - iPSC	ATRX
chr12	79433401	79439425	L1PA2:L1:LINE	-	Exonic	chr12	79439432	79439606	SYT1	+	Non-DE	SRR6368559	Deneault et al. - iPSC	ATRX
chr12	79433401	79439425	L1PA2:L1:LINE	-	Exonic	chr12	79439432	79439606	SYT1	+	Non-DE	SRR6368558	Deneault et al. - iPSC	ATRX
chr12	79433401	79439425	L1PA2:L1:LINE	-	Exonic	chr12	79439432	79439606	SYT1	+	Non-DE	SRR6368560	Deneault et al. - iPSC	ATRX
chr12	79433401	79439425	L1PA2:L1:LINE	-	Exonic	chr12	79439432	79439606	SYT1	+	Non-DE	SRR6368561	Deneault et al. - iPSC	ATRX
chr12	96709720	96715749	L1PA2:L1:LINE	+	Intronic	chr12	96717725	96717890	CDK17	-	Non-DE	SRR6368558	Deneault et al. - iPSC	ATRX
chr12	96709720	96715749	L1PA2:L1:LINE	+	Intronic	chr12	96717725	96717890	CDK17	-	Non-DE	SRR6368559	Deneault et al. - iPSC	ATRX
chr12	96709720	96715749	L1PA2:L1:LINE	+	Intronic	chr12	96717725	96717890	CDK17	-	Non-DE	SRR6368560	Deneault et al. - iPSC	ATRX
chr13	49039691	49045702	L1HS:L1:LINE	+	Intronic	chr13	49039340	49039504	RB1	+	Non-DE	SRR6368561	Deneault et al. - iPSC	ATRX
chr13	49039691	49045702	L1HS:L1:LINE	+	Intronic	chr13	49039340	49039504	RB1	+	Non-DE	SRR6368560	Deneault et al. - iPSC	ATRX
chr13	49039691	49045702	L1HS:L1:LINE	+	Intronic	chr13	49039340	49039504	RB1	+	Non-DE	SRR6368559	Deneault et al. - iPSC	ATRX
chr13	49039691	49045702	L1HS:L1:LINE	+	Intronic	chr13	49039340	49039504	RB1	+	Non-DE	SRR6368558	Deneault et al. - iPSC	ATRX
chr15	56426816	56432826	L1PA2:L1:LINE	-	Intronic	chr15	56434975	56435098	RFX7	-	Non-DE	SRR6368558	Deneault et al. - iPSC	ATRX
chr15	81960854	81966845	L1PA2:L1:LINE	-	Intronic	chr15	81666329	81666418	TMC3	-	Non-DE	SRR6368561	Deneault et al. - iPSC	ATRX
chr15	81960854	81966845	L1PA2:L1:LINE	-	Intronic	chr15	81666329	81666418	TMC3	-	Non-DE	SRR6368560	Deneault et al. - iPSC	ATRX
chr15	81960854	81966845	L1PA2:L1:LINE	-	Intronic	chr15	81666329	81666418	TMC3	-	Non-DE	SRR6368558	Deneault et al. - iPSC	ATRX
chr15	81960854	81966845	L1PA2:L1:LINE	-	Intronic	chr15	81666329	81666418	TMC3	-	Non-DE	SRR6368559	Deneault et al. - iPSC	ATRX
chr15	82090271	82096304	L1PA2:L1:LINE	+	Intronic	chr15	82334118	82336954	MEX3B	-	Up-regulated	SRR6368558	Deneault et al. - iPSC	ATRX
chr15	82090271	82096304	L1PA2:L1:LINE	+	Intronic	chr15	82334118	82336954	MEX3B	-	Up-regulated	SRR6368560	Deneault et al. - iPSC	ATRX
chr15	82090271	82096304	L1PA2:L1:LINE	+	Intronic	chr15	82334118	82336954	MEX3B	-	Up-regulated	SRR6368559	Deneault et al. - iPSC	ATRX
chr15	82090271	82096304	L1PA2:L1:LINE	+	Intronic	chr15	82334118	82336954	MEX3B	-	Up-regulated	SRR6368561	Deneault et al. - iPSC	ATRX
chr15	82163008	82169040	L1PA2:L1:LINE	+	Intronic	chr15	82334118	82336954	MEX3B	-	Up-regulated	SRR6368561	Deneault et al. - iPSC	ATRX
chr15	82163008	82169040	L1PA2:L1:LINE	+	Intronic	chr15	82334118	82336954	MEX3B	-	Up-regulated	SRR6368560	Deneault et al. - iPSC	ATRX
chr15	82163008	82169040	L1PA2:L1:LINE	+	Intronic	chr15	82334118	82336954	MEX3B	-	Up-regulated	SRR6368559	Deneault et al. - iPSC	ATRX
chr15	82163008	82169040	L1PA2:L1:LINE	+	Intronic	chr15	82334118	82336954	MEX3B	-	Up-regulated	SRR6368558	Deneault et al. - iPSC	ATRX
chr15	82287507	82293537	L1PA2:L1:LINE	+	Intronic	chr15	82334118	82336954	MEX3B	-	Up-regulated	SRR6368560	Deneault et al. - iPSC	ATRX
chr15	82287507	82293537	L1PA2:L1:LINE	+	Intronic	chr15	82334118	82336954	MEX3B	-	Up-regulated	SRR6368559	Deneault et al. - iPSC	ATRX
chr15	82287507	82293537	L1PA2:L1:LINE	+	Intronic	chr15	82334118	82336954	MEX3B	-	Up-regulated	SRR6368558	Deneault et al. - iPSC	ATRX
chr15	82287507	82293537	L1PA2:L1:LINE	+	Intronic	chr15	82334118	82336954	MEX3B	-	Up-regulated	SRR6368561	Deneault et al. - iPSC	ATRX
chr15	90177549	90183532	L1PA3:L1:LINE	+	Intronic	chr15	90176916	90177114	KIF7	-	Non-DE	SRR6368558	Deneault et al. - iPSC	ATRX
chr15	90177549	90183532	L1PA3:L1:LINE	+	Intronic	chr15	90176916	90177114	KIF7	-	Non-DE	SRR6368561	Deneault et al. - iPSC	ATRX
chr15	97975923	97982079	L1PA3:L1:LINE	+	Intronic	chr15	97896726	97897019	RN7SL677P	+	Non-DE	SRR6368560	Deneault et al. - iPSC	ATRX
chr15	97975923	97982079	L1PA3:L1:LINE	+	Intronic	chr15	97896726	97897019	RN7SL677P	+	Non-DE	SRR6368561	Deneault et al. - iPSC	ATRX
chr15	97975923	97982079	L1PA3:L1:LINE	+	Intronic	chr15	97896726	97897019	RN7SL677P	+	Non-DE	SRR6368559	Deneault et al. - iPSC	ATRX
chr15	97975923	97982079	L1PA3:L1:LINE	+	Intronic	chr15	97896726	97897019	RN7SL677P	+	Non-DE	SRR6368558	Deneault et al. - iPSC	ATRX
chr15	102166653	102172678	L1PA2:L1:LINE	+	Intronic	chr15	102182048	102182847	TM2D3	-	Non-DE	SRR6368558	Deneault et al. - iPSC	ATRX
chr15	102166653	102172678	L1PA2:L1:LINE	+	Intronic	chr15	102182048	102182847	TM2D3	-	Non-DE	SRR6368559	Deneault et al. - iPSC	ATRX
chr16	18832575	18838378	L1HS:L1:LINE	-	Intronic	chr16	18839352	18839490	SMG1	-	Non-DE	SRR6368558	Deneault et al. - iPSC	ATRX
chr16	82172856	82178863	L1PA2:L1:LINE	+	Intronic	chr16	82181766	82182468	MPHOSPH6	-	Non-DE	SRR6368558	Deneault et al. - iPSC	ATRX
chr16	82172856	82178863	L1PA2:L1:LINE	+	Intronic	chr16	82181766	82182468	MPHOSPH6	-	Non-DE	SRR6368559	Deneault et al. - iPSC	ATRX
chr16	82172856	82178863	L1PA2:L1:LINE	+	Intronic	chr16	82181766	82182468	MPHOSPH6	-	Non-DE	SRR6368560	Deneault et al. - iPSC	ATRX
chr16	82172856	82178863	L1PA2:L1:LINE	+	Intronic	chr16	82181766	82182468	MPHOSPH6	-	Non-DE	SRR6368561	Deneault et al. - iPSC	ATRX
chr17	58958801	58964835	L1PA2:L1:LINE	-	Intronic	chr17	58967055	58967132	BCAS3	+	Non-DE	SRR6368558	Deneault et al. - iPSC	ATRX
chr17	58958801	58964835	L1PA2:L1:LINE	-	Intronic	chr17	58967055	58967132	BCAS3	+	Non-DE	SRR6368559	Deneault et al. - iPSC	ATRX
chr17	58958801	58964835	L1PA2:L1:LINE	-	Intronic	chr17	58967055	58967132	BCAS3	+	Non-DE	SRR6368560	Deneault et al. - iPSC	ATRX
chr17	58958801	58964835	L1PA2:L1:LINE	-	Intronic	chr17	58967055	58967132	BCAS3	+	Non-DE	SRR6368561	Deneault et al. - iPSC	ATRX
chr18	53382715	53388760	L1PA2:L1:LINE	-	Intronic	chr18	53443957	53447261	LINC01415	-	Non-DE	SRR6368558	Deneault et al. - iPSC	ATRX
chr18	53382715	53388760	L1PA2:L1:LINE	-	Intronic	chr18	53443957	53447261	LINC01415	-	Non-DE	SRR6368559	Deneault et al. - iPSC	ATRX
chr18	53382715	53388760	L1PA2:L1:LINE	-	Intronic	chr18	53443957	53447261	LINC01415	-	Non-DE	SRR6368560	Deneault et al. - iPSC	ATRX
chr18	53382715	53388760	L1PA2:L1:LINE	-	Intronic	chr18	53443957	53447261	LINC01415	-	Non-DE	SRR6368561	Deneault et al. - iPSC	ATRX
chr18	60573525	60579547	L1HS:L1:LINE	+	Intronic	chr18	60572456	60572517	PHLPP1	+	Non-DE	SRR6368560	Deneault et al. - iPSC	ATRX
chr18	60573525	60579547	L1HS:L1:LINE	+	Intronic	chr18	60572456	60572517	PHLPP1	+	Non-DE	SRR6368559	Deneault et al. - iPSC	ATRX
chr18	60573525	60579547	L1HS:L1:LINE	+	Intronic	chr18	60572456	60572517	PHLPP1	+	Non-DE	SRR6368558	Deneault et al. - iPSC	ATRX
chr18	75127932	75133958	L1PA3:L1:LINE	-	Intronic	chr18	74980540	74982096	GALR1	+	Non-DE	SRR6368559	Deneault et al. - iPSC	ATRX
chr18	75127932	75133958	L1PA3:L1:LINE	-	Intronic	chr18	74980540	74982096	GALR1	+	Non-DE	SRR6368558	Deneault et al. - iPSC	ATRX
chr18	75127932	75133958	L1PA3:L1:LINE	-	Intronic	chr18	74980540	74982096	GALR1	+	Non-DE	SRR6368560	Deneault et al. - iPSC	ATRX
chr18	75127932	75133958	L1PA3:L1:LINE	-	Intronic	chr18	74980540	74982096	GALR1	+	Non-DE	SRR6368561	Deneault et al. - iPSC	ATRX
chr18	75289711	75295821	L1PA6:L1:LINE	+	Intergenic	chr18	74980540	74982096	GALR1	+	Non-DE	SRR6368558	Deneault et al. - iPSC	ATRX
chr18	75289711	75295821	L1PA6:L1:LINE	+	Intergenic	chr18	74980540	74982096	GALR1	+	Non-DE	SRR6368559	Deneault et al. - iPSC	ATRX
chr18	75289711	75295821	L1PA6:L1:LINE	+	Intergenic	chr18	74980540	74982096	GALR1	+	Non-DE	SRR6368560	Deneault et al. - iPSC	ATRX
chr18	75289711	75295821	L1PA6:L1:LINE	+	Intergenic	chr18	74980540	74982096	GALR1	+	Non-DE	SRR6368561	Deneault et al. - iPSC	ATRX
chr19	12115626	12121630	L1PA3:L1:LINE	-	Intronic	chr19	12112588	12112637	ZNF433-AS1	+	Non-DE	SRR6368558	Deneault et al. - iPSC	ATRX
chr19	20990530	20996633	L1PA3:L1:LINE	+	Intronic	chr19	20976588	20977403	ZNF66	+	Non-DE	SRR6368559	Deneault et al. - iPSC	ATRX
chr19	20990530	20996633	L1PA3:L1:LINE	+	Intronic	chr19	20976588	20977403	ZNF66	+	Up-regulated	SRR6368558	Deneault et al. - iPSC	ATRX
chr2	71638604	71644631	L1HS:L1:LINE	-	Intronic	chr2	71645731	71645769	ZNF638	+	Non-DE	SRR6368559	Deneault et al. - iPSC	ATRX
chr2	71638604	71644631	L1HS:L1:LINE	-	Intronic	chr2	71645731	71645769	ZNF638	+	Non-DE	SRR6368560	Deneault et al. - iPSC	ATRX
chr2	71638604	71644631	L1HS:L1:LINE	-	Intronic	chr2	71645731	71645769	ZNF638	+	Non-DE	SRR6368558	Deneault et al. - iPSC	ATRX
chr2	73948522	73954676	L1PA3:L1:LINE	+	Intergenic	chr2	73956956	73957156	TPRKB	-	Non-DE	SRR6368558	Deneault et al. - iPSC	ATRX
chr2	73948522	73954676	L1PA3:L1:LINE	+	Intergenic	chr2	73956956	73957156	TPRKB	-	Non-DE	SRR6368559	Deneault et al. - iPSC	ATRX
chr2	73948522	73954676	L1PA3:L1:LINE	+	Intergenic	chr2	73956956	73957156	TPRKB	-	Non-DE	SRR6368560	Deneault et al. - iPSC	ATRX
chr2	118380829	118386852	L1PA3:L1:LINE	+	Intergenic	chr2	118572254	118572438	DDX18	+	Non-DE	SRR6368558	Deneault et al. - iPSC	ATRX
chr2	118380829	118386852	L1PA3:L1:LINE	+	Intergenic	chr2	118572254	118572438	DDX18	+	Non-DE	SRR6368561	Deneault et al. - iPSC	ATRX
chr2	118380829	118386852	L1PA3:L1:LINE	+	Intergenic	chr2	118572254	118572438	DDX18	+	Non-DE	SRR6368559	Deneault et al. - iPSC	ATRX
chr2	118380829	118386852	L1PA3:L1:LINE	+	Intergenic	chr2	118572254	118572438	DDX18	+	Non-DE	SRR6368560	Deneault et al. - iPSC	ATRX
chr2	170105133	170111166	L1HS:L1:LINE	+	Intronic	chr2	170103887	170104025	LRP2	-	Non-DE	SRR6368559	Deneault et al. - iPSC	ATRX
chr2	170105133	170111166	L1HS:L1:LINE	+	Intronic	chr2	170103887	170104025	LRP2	-	Non-DE	SRR6368560	Deneault et al. - iPSC	ATRX
chr2	170105133	170111166	L1HS:L1:LINE	+	Intronic	chr2	170103887	170104025	LRP2	-	Non-DE	SRR6368561	Deneault et al. - iPSC	ATRX
chr2	170105133	170111166	L1HS:L1:LINE	+	Intronic	chr2	170103887	170104025	LRP2	-	Non-DE	SRR6368558	Deneault et al. - iPSC	ATRX
chr2	186284161	186290189	L1PA2:L1:LINE	-	Intronic	chr2	186411871	186411894	DD413621	-	Non-DE	SRR6368560	Deneault et al. - iPSC	ATRX
chr2	186284161	186290189	L1PA2:L1:LINE	-	Intronic	chr2	186411871	186411894	DD413621	-	Non-DE	SRR6368559	Deneault et al. - iPSC	ATRX
chr2	186284161	186290189	L1PA2:L1:LINE	-	Intronic	chr2	186411871	186411894	DD413621	-	Non-DE	SRR6368558	Deneault et al. - iPSC	ATRX
chr20	8575748	8581774	L1PA2:L1:LINE	-	Intronic	chr20	8608940	8609078	PLCB1	+	Non-DE	SRR6368561	Deneault et al. - iPSC	ATRX
chr20	8575748	8581774	L1PA2:L1:LINE	-	Intronic	chr20	8608940	8609078	PLCB1	+	Non-DE	SRR6368560	Deneault et al. - iPSC	ATRX
chr20	8575748	8581774	L1PA2:L1:LINE	-	Intronic	chr20	8608940	8609078	PLCB1	+	Non-DE	SRR6368559	Deneault et al. - iPSC	ATRX
chr20	8575748	8581774	L1PA2:L1:LINE	-	Intronic	chr20	8608940	8609078	PLCB1	+	Non-DE	SRR6368558	Deneault et al. - iPSC	ATRX
chr20	52120390	52126413	L1PA2:L1:LINE	+	Exonic	chr20	52120647	52120860	RP4-669H2.1	-	Non-DE	SRR6368558	Deneault et al. - iPSC	ATRX
chr20	52120390	52126413	L1PA2:L1:LINE	+	Exonic	chr20	52120647	52120860	RP4-669H2.1	-	Non-DE	SRR6368559	Deneault et al. - iPSC	ATRX
chr20	52120390	52126413	L1PA2:L1:LINE	+	Exonic	chr20	52120647	52120860	RP4-669H2.1	-	Non-DE	SRR6368560	Deneault et al. - iPSC	ATRX
chr20	52120390	52126413	L1PA2:L1:LINE	+	Exonic	chr20	52120647	52120860	RP4-669H2.1	-	Non-DE	SRR6368561	Deneault et al. - iPSC	ATRX
chr21	35297926	35303910	L1PA2:L1:LINE	-	Exonic	chr21	35303515	35304046	LINC00649	+	Non-DE	SRR6368558	Deneault et al. - iPSC	ATRX
chr21	35297926	35303910	L1PA2:L1:LINE	-	Exonic	chr21	35303515	35304046	LINC00649	+	Non-DE	SRR6368559	Deneault et al. - iPSC	ATRX
chr21	35297926	35303910	L1PA2:L1:LINE	-	Exonic	chr21	35303515	35304046	LINC00649	+	Non-DE	SRR6368560	Deneault et al. - iPSC	ATRX
chr21	35297926	35303910	L1PA2:L1:LINE	-	Exonic	chr21	35303515	35304046	LINC00649	+	Non-DE	SRR6368561	Deneault et al. - iPSC	ATRX
chr3	27857474	27863474	L1PA7:L1:LINE	-	Intronic	chr3	27872378	27875073	LINC01981	-	Non-DE	SRR6368559	Deneault et al. - iPSC	ATRX
chr3	27857474	27863474	L1PA7:L1:LINE	-	Intronic	chr3	27872378	27875073	LINC01981	-	Non-DE	SRR6368560	Deneault et al. - iPSC	ATRX
chr3	27857474	27863474	L1PA7:L1:LINE	-	Intronic	chr3	27872378	27875073	LINC01981	-	Non-DE	SRR6368561	Deneault et al. - iPSC	ATRX
chr3	27857474	27863474	L1PA7:L1:LINE	-	Intronic	chr3	27872378	27875073	LINC01981	-	Non-DE	SRR6368558	Deneault et al. - iPSC	ATRX
chr3	58827880	58833905	L1PA2:L1:LINE	+	Intronic	chr3	58817411	58817615	CFAP20DC	-	Non-DE	SRR6368559	Deneault et al. - iPSC	ATRX
chr3	58827880	58833905	L1PA2:L1:LINE	+	Intronic	chr3	58817411	58817615	CFAP20DC	-	Non-DE	SRR6368560	Deneault et al. - iPSC	ATRX
chr3	58827880	58833905	L1PA2:L1:LINE	+	Intronic	chr3	58817411	58817615	CFAP20DC	-	Non-DE	SRR6368558	Deneault et al. - iPSC	ATRX
chr3	58827880	58833905	L1PA2:L1:LINE	+	Intronic	chr3	58817411	58817615	CFAP20DC	-	Non-DE	SRR6368561	Deneault et al. - iPSC	ATRX
chr3	134971056	134977072	L1PA2:L1:LINE	-	Intronic	chr3	134977853	134979307	EPHB1	+	Non-DE	SRR6368558	Deneault et al. - iPSC	ATRX
chr3	134971056	134977072	L1PA2:L1:LINE	-	Intronic	chr3	134977853	134979307	EPHB1	+	Non-DE	SRR6368561	Deneault et al. - iPSC	ATRX
chr3	134971056	134977072	L1PA2:L1:LINE	-	Intronic	chr3	134977853	134979307	EPHB1	+	Non-DE	SRR6368560	Deneault et al. - iPSC	ATRX
chr3	134971056	134977072	L1PA2:L1:LINE	-	Intronic	chr3	134977853	134979307	EPHB1	+	Non-DE	SRR6368559	Deneault et al. - iPSC	ATRX
chr3	154951845	154958485	L1PA15:L1:LINE	-	Intergenic	chr3	154958733	154959414	LINC01487	+	Non-DE	SRR6368561	Deneault et al. - iPSC	ATRX
chr3	154951845	154958485	L1PA15:L1:LINE	-	Intergenic	chr3	154958733	154959414	LINC01487	+	Non-DE	SRR6368560	Deneault et al. - iPSC	ATRX
chr3	154951845	154958485	L1PA15:L1:LINE	-	Intergenic	chr3	154958733	154959414	LINC01487	+	Non-DE	SRR6368559	Deneault et al. - iPSC	ATRX
chr3	154951845	154958485	L1PA15:L1:LINE	-	Intergenic	chr3	154958733	154959414	LINC01487	+	Non-DE	SRR6368558	Deneault et al. - iPSC	ATRX
chr4	159638	165778	L1PA4:L1:LINE	-	Intronic	chr4	154701	156490	ZNF718	+	Non-DE	SRR6368558	Deneault et al. - iPSC	ATRX
chr4	159638	165778	L1PA4:L1:LINE	-	Intronic	chr4	154701	156490	ZNF718	+	Non-DE	SRR6368558	Deneault et al. - iPSC	ATRX
chr4	159638	165778	L1PA4:L1:LINE	-	Intronic	chr4	154701	156490	ZNF718	+	Non-DE	SRR6368559	Deneault et al. - iPSC	ATRX
chr4	159638	165778	L1PA4:L1:LINE	-	Intronic	chr4	154701	156490	ZNF718	+	Non-DE	SRR6368559	Deneault et al. - iPSC	ATRX
chr4	159638	165778	L1PA4:L1:LINE	-	Intronic	chr4	154701	156490	ZNF718	+	Non-DE	SRR6368561	Deneault et al. - iPSC	ATRX
chr4	159638	165778	L1PA4:L1:LINE	-	Intronic	chr4	154701	156490	ZNF718	+	Non-DE	SRR6368561	Deneault et al. - iPSC	ATRX
chr4	159638	165778	L1PA4:L1:LINE	-	Intronic	chr4	154701	156490	ZNF718	+	Non-DE	SRR6368560	Deneault et al. - iPSC	ATRX
chr4	159638	165778	L1PA4:L1:LINE	-	Intronic	chr4	154701	156490	ZNF718	+	Non-DE	SRR6368560	Deneault et al. - iPSC	ATRX
chr4	20740248	20746401	L1PA5:L1:LINE	+	Intronic	chr4	20736250	20736358	KCNIP4	-	Non-DE	SRR6368558	Deneault et al. - iPSC	ATRX
chr4	57197420	57203548	L1PA3:L1:LINE	-	Intergenic	chr4	57193809	57196890	CRACD	+	Non-DE	SRR6368558	Deneault et al. - iPSC	ATRX
chr4	62609439	62615587	L1PA3:L1:LINE	+	Intronic	chr4	62598471	62599272	ADGRL3	+	Non-DE	SRR6368559	Deneault et al. - iPSC	ATRX
chr4	62609439	62615587	L1PA3:L1:LINE	+	Intronic	chr4	62598471	62599272	ADGRL3	+	Non-DE	SRR6368560	Deneault et al. - iPSC	ATRX
chr4	62609439	62615587	L1PA3:L1:LINE	+	Intronic	chr4	62598471	62599272	ADGRL3	+	Non-DE	SRR6368558	Deneault et al. - iPSC	ATRX
chr4	62609439	62615587	L1PA3:L1:LINE	+	Intronic	chr4	62598471	62599272	ADGRL3	+	Non-DE	SRR6368561	Deneault et al. - iPSC	ATRX
chr4	62620336	62626523	L1PA4:L1:LINE	-	Intronic	chr4	62598471	62599272	ADGRL3	+	Non-DE	SRR6368559	Deneault et al. - iPSC	ATRX
chr4	62620336	62626523	L1PA4:L1:LINE	-	Intronic	chr4	62598471	62599272	ADGRL3	+	Non-DE	SRR6368558	Deneault et al. - iPSC	ATRX
chr4	62620336	62626523	L1PA4:L1:LINE	-	Intronic	chr4	62598471	62599272	ADGRL3	+	Non-DE	SRR6368561	Deneault et al. - iPSC	ATRX
chr4	62620336	62626523	L1PA4:L1:LINE	-	Intronic	chr4	62598471	62599272	ADGRL3	+	Non-DE	SRR6368560	Deneault et al. - iPSC	ATRX
chr4	62805645	62811680	L1HS:L1:LINE	-	Intronic	chr4	62812631	62812840	ADGRL3	+	Non-DE	SRR6368558	Deneault et al. - iPSC	ATRX
chr4	62805645	62811680	L1HS:L1:LINE	-	Intronic	chr4	62812631	62812840	ADGRL3	+	Non-DE	SRR6368560	Deneault et al. - iPSC	ATRX
chr4	62805645	62811680	L1HS:L1:LINE	-	Intronic	chr4	62812631	62812840	ADGRL3	+	Non-DE	SRR6368559	Deneault et al. - iPSC	ATRX
chr4	62805645	62811680	L1HS:L1:LINE	-	Intronic	chr4	62812631	62812840	ADGRL3	+	Non-DE	SRR6368561	Deneault et al. - iPSC	ATRX
chr4	69285971	69292051	L1PA6:L1:LINE	+	Intergenic	chr4	69313166	69313241	TMPRSS11E	+	Non-DE	SRR6368559	Deneault et al. - iPSC	ATRX
chr4	69285971	69292051	L1PA6:L1:LINE	+	Intergenic	chr4	69313166	69313241	TMPRSS11E	+	Non-DE	SRR6368560	Deneault et al. - iPSC	ATRX
chr4	69285971	69292051	L1PA6:L1:LINE	+	Intergenic	chr4	69313166	69313241	TMPRSS11E	+	Non-DE	SRR6368561	Deneault et al. - iPSC	ATRX
chr4	69285971	69292051	L1PA6:L1:LINE	+	Intergenic	chr4	69313166	69313241	TMPRSS11E	+	Non-DE	SRR6368558	Deneault et al. - iPSC	ATRX
chr4	71919553	71925574	L1PA3:L1:LINE	-	Intergenic	chr4	71895068	71896629	DCK	+	Non-DE	SRR6368561	Deneault et al. - iPSC	ATRX
chr4	71919553	71925574	L1PA3:L1:LINE	-	Intergenic	chr4	71895068	71896629	DCK	+	Non-DE	SRR6368560	Deneault et al. - iPSC	ATRX
chr4	71919553	71925574	L1PA3:L1:LINE	-	Intergenic	chr4	71895068	71896629	DCK	+	Non-DE	SRR6368559	Deneault et al. - iPSC	ATRX
chr4	71919553	71925574	L1PA3:L1:LINE	-	Intergenic	chr4	71895068	71896629	DCK	+	Non-DE	SRR6368558	Deneault et al. - iPSC	ATRX
chr4	91596877	91602908	L1HS:L1:LINE	-	Intronic	chr4	91645064	91645142	CCSER1	+	Non-DE	SRR6368559	Deneault et al. - iPSC	ATRX
chr4	91596877	91602908	L1HS:L1:LINE	-	Intronic	chr4	91645064	91645142	CCSER1	+	Non-DE	SRR6368561	Deneault et al. - iPSC	ATRX
chr4	91596877	91602908	L1HS:L1:LINE	-	Intronic	chr4	91645064	91645142	CCSER1	+	Non-DE	SRR6368558	Deneault et al. - iPSC	ATRX
chr4	91596877	91602908	L1HS:L1:LINE	-	Intronic	chr4	91645064	91645142	CCSER1	+	Non-DE	SRR6368560	Deneault et al. - iPSC	ATRX
chr4	104171422	104177447	L1PA2:L1:LINE	-	Intronic	chr4	104119420	104119566	CENPE	-	Non-DE	SRR6368559	Deneault et al. - iPSC	ATRX
chr4	104171422	104177447	L1PA2:L1:LINE	-	Intronic	chr4	104119420	104119566	CENPE	-	Non-DE	SRR6368561	Deneault et al. - iPSC	ATRX
chr4	104171422	104177447	L1PA2:L1:LINE	-	Intronic	chr4	104119420	104119566	CENPE	-	Non-DE	SRR6368558	Deneault et al. - iPSC	ATRX
chr4	104171422	104177447	L1PA2:L1:LINE	-	Intronic	chr4	104119420	104119566	CENPE	-	Non-DE	SRR6368560	Deneault et al. - iPSC	ATRX
chr4	167664640	167670800	L1PA5:L1:LINE	+	Intronic	chr4	167663147	167663210	SPOCK3	-	Up-regulated	SRR6368558	Deneault et al. - iPSC	ATRX
chr4	167664640	167670800	L1PA5:L1:LINE	+	Intronic	chr4	167663147	167663210	SPOCK3	-	Up-regulated	SRR6368559	Deneault et al. - iPSC	ATRX
chr4	167664640	167670800	L1PA5:L1:LINE	+	Intronic	chr4	167663147	167663210	SPOCK3	-	Up-regulated	SRR6368561	Deneault et al. - iPSC	ATRX
chr4	167664640	167670800	L1PA5:L1:LINE	+	Intronic	chr4	167663147	167663210	SPOCK3	-	Up-regulated	SRR6368560	Deneault et al. - iPSC	ATRX
chr5	82753618	82759636	L1PA2:L1:LINE	-	Intergenic	chr5	82767492	82767842	VCAN	+	Non-DE	SRR6368560	Deneault et al. - iPSC	ATRX
chr5	82753618	82759636	L1PA2:L1:LINE	-	Intergenic	chr5	82767492	82767842	VCAN	+	Non-DE	SRR6368561	Deneault et al. - iPSC	ATRX
chr5	82753618	82759636	L1PA2:L1:LINE	-	Intergenic	chr5	82767492	82767842	VCAN	+	Non-DE	SRR6368559	Deneault et al. - iPSC	ATRX
chr5	82753618	82759636	L1PA2:L1:LINE	-	Intergenic	chr5	82767492	82767842	VCAN	+	Non-DE	SRR6368558	Deneault et al. - iPSC	ATRX
chr6	8770704	8776745	L1PA2:L1:LINE	-	Intronic	chr6	8710841	8712526	LOC100506207	+	Non-DE	SRR6368558	Deneault et al. - iPSC	ATRX
chr6	8770704	8776745	L1PA2:L1:LINE	-	Intronic	chr6	8710841	8712526	LOC100506207	+	Non-DE	SRR6368561	Deneault et al. - iPSC	ATRX
chr6	8770704	8776745	L1PA2:L1:LINE	-	Intronic	chr6	8710841	8712526	LOC100506207	+	Non-DE	SRR6368560	Deneault et al. - iPSC	ATRX
chr6	8770704	8776745	L1PA2:L1:LINE	-	Intronic	chr6	8710841	8712526	LOC100506207	+	Non-DE	SRR6368559	Deneault et al. - iPSC	ATRX
chr6	91271827	91277941	L1PA5:L1:LINE	+	Intronic	chr6	91278276	91278342	MAP3K7	-	Up-regulated	SRR6368559	Deneault et al. - iPSC	ATRX
chr6	91271827	91277941	L1PA5:L1:LINE	+	Intronic	chr6	91278276	91278342	MAP3K7	-	Up-regulated	SRR6368558	Deneault et al. - iPSC	ATRX
chr6	98242519	98248408	L1PA4:L1:LINE	+	Intronic	chr6	98155562	98156726	RP11-436D23.1	+	Non-DE	SRR6368560	Deneault et al. - iPSC	ATRX
chr6	98242519	98248408	L1PA4:L1:LINE	+	Intronic	chr6	98155562	98156726	RP11-436D23.1	+	Non-DE	SRR6368559	Deneault et al. - iPSC	ATRX
chr6	98242519	98248408	L1PA4:L1:LINE	+	Intronic	chr6	98155562	98156726	RP11-436D23.1	+	Non-DE	SRR6368561	Deneault et al. - iPSC	ATRX
chr6	98242519	98248408	L1PA4:L1:LINE	+	Intronic	chr6	98155562	98156726	RP11-436D23.1	+	Non-DE	SRR6368558	Deneault et al. - iPSC	ATRX
chr6	116959859	116965997	L1PA3:L1:LINE	+	Intronic	chr6	116966876	116967097	ZUP1	-	Non-DE	SRR6368561	Deneault et al. - iPSC	ATRX
chr7	12536837	12542864	L1PA3:L1:LINE	+	Intronic	chr7	12596186	12596356	BC075797	+	Non-DE	SRR6368558	Deneault et al. - iPSC	ATRX
chr7	12536837	12542864	L1PA3:L1:LINE	+	Intronic	chr7	12596186	12596356	BC075797	+	Non-DE	SRR6368561	Deneault et al. - iPSC	ATRX
chr7	12536837	12542864	L1PA3:L1:LINE	+	Intronic	chr7	12596186	12596356	BC075797	+	Non-DE	SRR6368560	Deneault et al. - iPSC	ATRX
chr7	12536837	12542864	L1PA3:L1:LINE	+	Intronic	chr7	12596186	12596356	BC075797	+	Non-DE	SRR6368559	Deneault et al. - iPSC	ATRX
chr7	39047127	39053152	L1PA2:L1:LINE	-	Exonic	chr7	39053012	39053161	POU6F2-AS2	-	Non-DE	SRR6368561	Deneault et al. - iPSC	ATRX
chr7	39047127	39053152	L1PA2:L1:LINE	-	Exonic	chr7	39053012	39053161	POU6F2-AS2	-	Non-DE	SRR6368560	Deneault et al. - iPSC	ATRX
chr7	39047127	39053152	L1PA2:L1:LINE	-	Exonic	chr7	39053012	39053161	POU6F2-AS2	-	Non-DE	SRR6368559	Deneault et al. - iPSC	ATRX
chr7	39047127	39053152	L1PA2:L1:LINE	-	Exonic	chr7	39053012	39053161	POU6F2-AS2	-	Non-DE	SRR6368558	Deneault et al. - iPSC	ATRX
chr7	91813070	91819192	L1PA3:L1:LINE	-	Intronic	chr7	91808164	91809228	CYP51A1-AS1	+	Non-DE	SRR6368558	Deneault et al. - iPSC	ATRX
chr7	91813070	91819192	L1PA3:L1:LINE	-	Intronic	chr7	91808164	91809228	CYP51A1-AS1	+	Non-DE	SRR6368560	Deneault et al. - iPSC	ATRX
chr8	73968584	73974141	L1PA6:L1:LINE	+	Intronic	chr8	73976777	73979693	SBSPON	-	Up-regulated	SRR6368558	Deneault et al. - iPSC	ATRX
chr8	73968584	73974141	L1PA6:L1:LINE	+	Intronic	chr8	73976777	73979693	SBSPON	-	Non-DE	SRR6368560	Deneault et al. - iPSC	ATRX
chr9	42690271	42696344	L1PA3:L1:LINE	-	Intronic	chr9	42689821	42689878	CBWD7	+	Non-DE	SRR6368558	Deneault et al. - iPSC	ATRX
chr9	42690271	42696344	L1PA3:L1:LINE	-	Intronic	chr9	42689821	42689878	CBWD7	+	Non-DE	SRR6368559	Deneault et al. - iPSC	ATRX
chr9	42690271	42696344	L1PA3:L1:LINE	-	Intronic	chr9	42689821	42689878	CBWD7	+	Non-DE	SRR6368560	Deneault et al. - iPSC	ATRX
chr9	42690271	42696344	L1PA3:L1:LINE	-	Intronic	chr9	42689821	42689878	CBWD7	+	Non-DE	SRR6368561	Deneault et al. - iPSC	ATRX
chr9	70199709	70205784	L1PA3:L1:LINE	+	Intronic	chr9	70195030	70195743	CBWD5	-	Non-DE	SRR6368561	Deneault et al. - iPSC	ATRX
chr9	70199709	70205784	L1PA3:L1:LINE	+	Intronic	chr9	70195030	70195743	CBWD5	-	Non-DE	SRR6368558	Deneault et al. - iPSC	ATRX
chr9	70199709	70205784	L1PA3:L1:LINE	+	Intronic	chr9	70195030	70195743	CBWD5	-	Non-DE	SRR6368559	Deneault et al. - iPSC	ATRX
chr9	89656797	89662815	L1PA3:L1:LINE	+	Exonic	chr9	89656785	89657041	LINC02893	-	Non-DE	SRR6368559	Deneault et al. - iPSC	ATRX
chr9	89656797	89662815	L1PA3:L1:LINE	+	Exonic	chr9	89656785	89657041	LINC02893	-	Non-DE	SRR6368558	Deneault et al. - iPSC	ATRX
chr9	89656797	89662815	L1PA3:L1:LINE	+	Exonic	chr9	89656785	89657041	LINC02893	-	Non-DE	SRR6368561	Deneault et al. - iPSC	ATRX
chr9	89656797	89662815	L1PA3:L1:LINE	+	Exonic	chr9	89656785	89657041	LINC02893	-	Non-DE	SRR6368560	Deneault et al. - iPSC	ATRX
chr9	96875817	96881847	L1HS:L1:LINE	-	Intronic	chr9	96870109	96872138	PTPDC1	+	Non-DE	SRR6368558	Deneault et al. - iPSC	ATRX
chr9	96875817	96881847	L1HS:L1:LINE	-	Intronic	chr9	96870109	96872138	PTPDC1	+	Non-DE	SRR6368559	Deneault et al. - iPSC	ATRX
chr9	96875817	96881847	L1HS:L1:LINE	-	Intronic	chr9	96870109	96872138	PTPDC1	+	Non-DE	SRR6368561	Deneault et al. - iPSC	ATRX
chr9	96875817	96881847	L1HS:L1:LINE	-	Intronic	chr9	96870109	96872138	PTPDC1	+	Non-DE	SRR6368560	Deneault et al. - iPSC	ATRX
chrUn_gl000211	11314	17387	L1PA3:L1:LINE	+	Intergenic	chrUn_gl000211	21804	23742	CR933660	-	Non-DE	SRR6368558	Deneault et al. - iPSC	ATRX
chrUn_gl000214	39518	45655	L1PA3:L1:LINE	-	Intergenic	chrUn_gl000214	32576	32635	BC012753	+	Non-DE	SRR6368561	Deneault et al. - iPSC	ATRX
chrUn_gl000214	39518	45655	L1PA3:L1:LINE	-	Intergenic	chrUn_gl000214	32576	32635	BC012753	+	Non-DE	SRR6368560	Deneault et al. - iPSC	ATRX
chrUn_gl000214	39518	45655	L1PA3:L1:LINE	-	Intergenic	chrUn_gl000214	32576	32635	BC012753	+	Non-DE	SRR6368559	Deneault et al. - iPSC	ATRX
chrUn_gl000214	39518	45655	L1PA3:L1:LINE	-	Intergenic	chrUn_gl000214	32576	32635	BC012753	+	Non-DE	SRR6368558	Deneault et al. - iPSC	ATRX
chrX	11725368	11731399	L1HS:L1:LINE	+	Intronic	chrX	11682360	11683821	ARHGAP6	-	Non-DE	SRR6368561	Deneault et al. - iPSC	ATRX
chrX	11725368	11731399	L1HS:L1:LINE	+	Intronic	chrX	11682360	11683821	ARHGAP6	-	Non-DE	SRR6368558	Deneault et al. - iPSC	ATRX
chrX	11725368	11731399	L1HS:L1:LINE	+	Intronic	chrX	11682360	11683821	ARHGAP6	-	Non-DE	SRR6368559	Deneault et al. - iPSC	ATRX
chrX	11725368	11731399	L1HS:L1:LINE	+	Intronic	chrX	11682360	11683821	ARHGAP6	-	Non-DE	SRR6368560	Deneault et al. - iPSC	ATRX
chrX	18123638	18129028	L1PA2:L1:LINE	+	Intergenic	chrX	18181050	18183343	BEND2	-	Non-DE	SRR6368559	Deneault et al. - iPSC	ATRX
chrX	18123638	18129028	L1PA2:L1:LINE	+	Intergenic	chrX	18181050	18183343	BEND2	-	Non-DE	SRR6368558	Deneault et al. - iPSC	ATRX
chrX	18123638	18129028	L1PA2:L1:LINE	+	Intergenic	chrX	18181050	18183343	BEND2	-	Non-DE	SRR6368561	Deneault et al. - iPSC	ATRX
chrX	18123638	18129028	L1PA2:L1:LINE	+	Intergenic	chrX	18181050	18183343	BEND2	-	Non-DE	SRR6368560	Deneault et al. - iPSC	ATRX
chrX	130712654	130718709	L1PA2:L1:LINE	+	Intronic	chrX	130678047	130678974	OR13H1	+	Non-DE	SRR6368559	Deneault et al. - iPSC	ATRX
chrX	130712654	130718709	L1PA2:L1:LINE	+	Intronic	chrX	130678047	130678974	OR13H1	+	Non-DE	SRR6368560	Deneault et al. - iPSC	ATRX
chrX	130712654	130718709	L1PA2:L1:LINE	+	Intronic	chrX	130678047	130678974	OR13H1	+	Non-DE	SRR6368558	Deneault et al. - iPSC	ATRX
chrX	130712654	130718709	L1PA2:L1:LINE	+	Intronic	chrX	130678047	130678974	OR13H1	+	Non-DE	SRR6368561	Deneault et al. - iPSC	ATRX
chrX	154583984	154589205	L1PA13:L1:LINE	+	Intergenic	chrX	154581173	154581271	RP13-228J13.1	-	Non-DE	SRR6368558	Deneault et al. - iPSC	ATRX
chrY	14959405	14965588	L1PA6:L1:LINE	-	Intronic	chrY	14959163	14959252	USP9Y	+	Non-DE	SRR6368558	Deneault et al. - iPSC	ATRX
chr10	33201104	33207283	L1PA5:L1:LINE	+	Exonic	chr10	33200813	33201052	ITGB1	-	Up-regulated	SRR6368567	Deneault et al. - iPSC	CACNA1C
chr10	33201104	33207283	L1PA5:L1:LINE	+	Exonic	chr10	33200813	33201052	ITGB1	-	Up-regulated	SRR6368566	Deneault et al. - iPSC	CACNA1C
chr10	55253766	55259783	L1PA3:L1:LINE	-	Intergenic	chr10	55580859	55583118	PCDH15	-	Non-DE	SRR6368566	Deneault et al. - iPSC	CACNA1C
chr10	55253766	55259783	L1PA3:L1:LINE	-	Intergenic	chr10	55580859	55583118	PCDH15	-	Non-DE	SRR6368567	Deneault et al. - iPSC	CACNA1C
chr13	77773162	77779196	L1PA3:L1:LINE	+	Intronic	chr13	77779390	77779518	MYCBP2	-	Up-regulated	SRR6368567	Deneault et al. - iPSC	CACNA1C
chr14	55414793	55420840	L1PA5:L1:LINE	+	Intronic	chr14	55422278	55422412	WDHD1	-	Non-DE	SRR6368567	Deneault et al. - iPSC	CACNA1C
chr14	55414793	55420840	L1PA5:L1:LINE	+	Intronic	chr14	55422278	55422412	WDHD1	-	Non-DE	SRR6368566	Deneault et al. - iPSC	CACNA1C
chr19	28186346	28192495	L1PA4:L1:LINE	-	Intronic	chr19	28221180	28223355	LINC00662	-	Non-DE	SRR6368567	Deneault et al. - iPSC	CACNA1C
chr19	28186346	28192495	L1PA4:L1:LINE	-	Intronic	chr19	28221180	28223355	LINC00662	-	Non-DE	SRR6368566	Deneault et al. - iPSC	CACNA1C
chr20	33659086	33665195	L1PA5:L1:LINE	-	Intronic	chr20	33665848	33665977	TRPC4AP	-	Non-DE	SRR6368566	Deneault et al. - iPSC	CACNA1C
chr3	134971056	134977072	L1PA2:L1:LINE	-	Intronic	chr3	134977853	134979307	EPHB1	+	Non-DE	SRR6368567	Deneault et al. - iPSC	CACNA1C
chr3	134971056	134977072	L1PA2:L1:LINE	-	Intronic	chr3	134977853	134979307	EPHB1	+	Non-DE	SRR6368566	Deneault et al. - iPSC	CACNA1C
chr4	159638	165778	L1PA4:L1:LINE	-	Intronic	chr4	154701	156490	ZNF718	+	Non-DE	SRR6368567	Deneault et al. - iPSC	CACNA1C
chr4	159638	165778	L1PA4:L1:LINE	-	Intronic	chr4	154701	156490	ZNF718	+	Non-DE	SRR6368567	Deneault et al. - iPSC	CACNA1C
chr4	159638	165778	L1PA4:L1:LINE	-	Intronic	chr4	154701	156490	ZNF718	+	Non-DE	SRR6368566	Deneault et al. - iPSC	CACNA1C
chr4	159638	165778	L1PA4:L1:LINE	-	Intronic	chr4	154701	156490	ZNF718	+	Non-DE	SRR6368566	Deneault et al. - iPSC	CACNA1C
chr5	77414039	77420179	L1PA4:L1:LINE	+	Intronic	chr5	77411949	77412058	AP3B1	-	Up-regulated	SRR6368566	Deneault et al. - iPSC	CACNA1C
chr8	63885234	63891726	L1PA7:L1:LINE	-	Exonic	chr8	63890419	63897460	UG0898H09	+	Non-DE	SRR6368567	Deneault et al. - iPSC	CACNA1C
chr9	8324107	8330317	L1PA7:L1:LINE	-	Intronic	chr9	8331581	8331736	PTPRD	-	Non-DE	SRR6368567	Deneault et al. - iPSC	CACNA1C
chrX	73253778	73259910	L1PA5:L1:LINE	-	Intronic	chrX	73251430	73251675	FTX	-	Non-DE	SRR6368567	Deneault et al. - iPSC	CACNA1C
chrY	14959405	14965588	L1PA6:L1:LINE	-	Intronic	chrY	14959163	14959252	USP9Y	+	Non-DE	SRR6368566	Deneault et al. - iPSC	CACNA1C
chrY	14959405	14965588	L1PA6:L1:LINE	-	Intronic	chrY	14959163	14959252	USP9Y	+	Non-DE	SRR6368567	Deneault et al. - iPSC	CACNA1C
chr1	121316087	121322219	L1PA3:L1:LINE	+	Intronic	chr1	121310573	121313686	EMBP1	+	Non-DE	SRR6368547	Deneault et al. - iPSC	CHD8
chr1	121316087	121322219	L1PA3:L1:LINE	+	Intronic	chr1	121310573	121313686	EMBP1	+	Non-DE	SRR6368545	Deneault et al. - iPSC	CHD8
chr1	171519607	171525696	L1PA6:L1:LINE	-	Intronic	chr1	171519224	171519379	PRRC2C	+	Non-DE	SRR6368544	Deneault et al. - iPSC	CHD8
chr10	33201104	33207283	L1PA5:L1:LINE	+	Exonic	chr10	33200813	33201052	ITGB1	-	Up-regulated	SRR6368546	Deneault et al. - iPSC	CHD8
chr10	33201104	33207283	L1PA5:L1:LINE	+	Exonic	chr10	33200813	33201052	ITGB1	-	Non-DE	SRR6368547	Deneault et al. - iPSC	CHD8
chr10	86039723	86045762	L1PA2:L1:LINE	+	Exonic	chr10	86039735	86039821	LINC00858	+	Non-DE	SRR6368545	Deneault et al. - iPSC	CHD8
chr10	86039723	86045762	L1PA2:L1:LINE	+	Exonic	chr10	86039735	86039821	LINC00858	+	Non-DE	SRR6368544	Deneault et al. - iPSC	CHD8
chr10	101400324	101406444	L1PA5:L1:LINE	-	Intergenic	chr10	101419262	101419345	ENTPD7	+	Non-DE	SRR6368544	Deneault et al. - iPSC	CHD8
chr11	11906779	11912696	L1PA10:L1:LINE	+	Intronic	chr11	11906013	11906127	USP47	+	Non-DE	SRR6368545	Deneault et al. - iPSC	CHD8
chr11	43367651	43373668	L1PA2:L1:LINE	-	Intronic	chr11	43363977	43366080	API5	+	Non-DE	SRR6368544	Deneault et al. - iPSC	CHD8
chr11	77037749	77042841	L1PA4:L1:LINE	+	Intronic	chr11	77043774	77043912	PAK1	-	Non-DE	SRR6368547	Deneault et al. - iPSC	CHD8
chr11	77037749	77042841	L1PA4:L1:LINE	+	Intronic	chr11	77043774	77043912	PAK1	-	Non-DE	SRR6368546	Deneault et al. - iPSC	CHD8
chr11	77037749	77042841	L1PA4:L1:LINE	+	Intronic	chr11	77043774	77043912	PAK1	-	Non-DE	SRR6368545	Deneault et al. - iPSC	CHD8
chr11	77037749	77042841	L1PA4:L1:LINE	+	Intronic	chr11	77043774	77043912	PAK1	-	Non-DE	SRR6368544	Deneault et al. - iPSC	CHD8
chr11	95169380	95175410	L1HS:L1:LINE	+	Intergenic	chr11	95257193	95257298	5S_rRNA	-	Non-DE	SRR6368544	Deneault et al. - iPSC	CHD8
chr11	102239897	102245923	L1PA2:L1:LINE	-	Intronic	chr11	102239036	102239279	BIRC2	+	Non-DE	SRR6368546	Deneault et al. - iPSC	CHD8
chr11	102239897	102245923	L1PA2:L1:LINE	-	Intronic	chr11	102239036	102239279	BIRC2	+	Non-DE	SRR6368547	Deneault et al. - iPSC	CHD8
chr15	25500760	25506894	L1PA5:L1:LINE	+	Intronic	chr15	25509673	25509726	SNORD115-45	+	Non-DE	SRR6368547	Deneault et al. - iPSC	CHD8
chr15	28399917	28406027	L1PA5:L1:LINE	-	Intronic	chr15	28397822	28397976	HERC2	-	Non-DE	SRR6368544	Deneault et al. - iPSC	CHD8
chr15	63909208	63914241	L1PA4:L1:LINE	-	Intronic	chr15	63908628	63908881	HERC1	-	Non-DE	SRR6368544	Deneault et al. - iPSC	CHD8
chr15	63909208	63914241	L1PA4:L1:LINE	-	Intronic	chr15	63908628	63908881	HERC1	-	Non-DE	SRR6368545	Deneault et al. - iPSC	CHD8
chr15	63909208	63914241	L1PA4:L1:LINE	-	Intronic	chr15	63908628	63908881	HERC1	-	Non-DE	SRR6368546	Deneault et al. - iPSC	CHD8
chr15	63909208	63914241	L1PA4:L1:LINE	-	Intronic	chr15	63908628	63908881	HERC1	-	Non-DE	SRR6368547	Deneault et al. - iPSC	CHD8
chr15	81960854	81966845	L1PA2:L1:LINE	-	Intronic	chr15	81666329	81666418	TMC3	-	Non-DE	SRR6368545	Deneault et al. - iPSC	CHD8
chr15	97975923	97982079	L1PA3:L1:LINE	+	Intronic	chr15	97896726	97897019	RN7SL677P	+	Non-DE	SRR6368545	Deneault et al. - iPSC	CHD8
chr16	18832575	18838378	L1HS:L1:LINE	-	Intronic	chr16	18839352	18839490	SMG1	-	Non-DE	SRR6368544	Deneault et al. - iPSC	CHD8
chr16	18832575	18838378	L1HS:L1:LINE	-	Intronic	chr16	18839352	18839490	SMG1	-	Non-DE	SRR6368545	Deneault et al. - iPSC	CHD8
chr18	53382715	53388760	L1PA2:L1:LINE	-	Intronic	chr18	53443957	53447261	LINC01415	-	Non-DE	SRR6368544	Deneault et al. - iPSC	CHD8
chr18	53382715	53388760	L1PA2:L1:LINE	-	Intronic	chr18	53443957	53447261	LINC01415	-	Non-DE	SRR6368547	Deneault et al. - iPSC	CHD8
chr18	75289711	75295821	L1PA6:L1:LINE	+	Intergenic	chr18	74980540	74982096	GALR1	+	Non-DE	SRR6368544	Deneault et al. - iPSC	CHD8
chr2	118380829	118386852	L1PA3:L1:LINE	+	Intergenic	chr2	118572254	118572438	DDX18	+	Non-DE	SRR6368546	Deneault et al. - iPSC	CHD8
chr2	118380829	118386852	L1PA3:L1:LINE	+	Intergenic	chr2	118572254	118572438	DDX18	+	Non-DE	SRR6368544	Deneault et al. - iPSC	CHD8
chr20	33659086	33665195	L1PA5:L1:LINE	-	Intronic	chr20	33665848	33665977	TRPC4AP	-	Non-DE	SRR6368545	Deneault et al. - iPSC	CHD8
chr20	52120390	52126413	L1PA2:L1:LINE	+	Exonic	chr20	52120647	52120860	RP4-669H2.1	-	Non-DE	SRR6368544	Deneault et al. - iPSC	CHD8
chr3	51681874	51687951	L1PA6:L1:LINE	+	Intronic	chr3	51680300	51680497	RAD54L2	+	Non-DE	SRR6368545	Deneault et al. - iPSC	CHD8
chr4	21771611	21778019	L1PA8A:L1:LINE	-	Intronic	chr4	21844963	21854811	KCNIP4-IT1	-	Non-DE	SRR6368544	Deneault et al. - iPSC	CHD8
chr4	71919553	71925574	L1PA3:L1:LINE	-	Intergenic	chr4	71895068	71896629	DCK	+	Non-DE	SRR6368544	Deneault et al. - iPSC	CHD8
chr4	91596877	91602908	L1HS:L1:LINE	-	Intronic	chr4	91645064	91645142	CCSER1	+	Non-DE	SRR6368544	Deneault et al. - iPSC	CHD8
chr4	104171422	104177447	L1PA2:L1:LINE	-	Intronic	chr4	104119420	104119566	CENPE	-	Non-DE	SRR6368547	Deneault et al. - iPSC	CHD8
chr4	104171422	104177447	L1PA2:L1:LINE	-	Intronic	chr4	104119420	104119566	CENPE	-	Non-DE	SRR6368546	Deneault et al. - iPSC	CHD8
chr4	104171422	104177447	L1PA2:L1:LINE	-	Intronic	chr4	104119420	104119566	CENPE	-	Non-DE	SRR6368544	Deneault et al. - iPSC	CHD8
chr4	104171422	104177447	L1PA2:L1:LINE	-	Intronic	chr4	104119420	104119566	CENPE	-	Non-DE	SRR6368545	Deneault et al. - iPSC	CHD8
chr4	151192064	151198580	L1PA7:L1:LINE	+	Intronic	chr4	151199004	151199156	LRBA	-	Non-DE	SRR6368545	Deneault et al. - iPSC	CHD8
chr5	74002130	74008268	L1PA3:L1:LINE	+	Intronic	chr5	74001043	74001145	HEXB	+	Up-regulated	SRR6368546	Deneault et al. - iPSC	CHD8
chr5	74002130	74008268	L1PA3:L1:LINE	+	Intronic	chr5	74001043	74001145	HEXB	+	Up-regulated	SRR6368547	Deneault et al. - iPSC	CHD8
chr6	8770704	8776745	L1PA2:L1:LINE	-	Intronic	chr6	8710841	8712526	LOC100506207	+	Non-DE	SRR6368544	Deneault et al. - iPSC	CHD8
chr6	91271827	91277941	L1PA5:L1:LINE	+	Intronic	chr6	91278276	91278342	MAP3K7	-	Non-DE	SRR6368546	Deneault et al. - iPSC	CHD8
chr6	116959859	116965997	L1PA3:L1:LINE	+	Intronic	chr6	116966876	116967097	ZUP1	-	Non-DE	SRR6368544	Deneault et al. - iPSC	CHD8
chr6	144172713	144178208	L1PA7:L1:LINE	-	Exonic	chr6	144175205	144177090	AX746989	+	Non-DE	SRR6368544	Deneault et al. - iPSC	CHD8
chr6	144172713	144178208	L1PA7:L1:LINE	-	Exonic	chr6	144175205	144177090	AX746989	+	Non-DE	SRR6368545	Deneault et al. - iPSC	CHD8
chr6	144172713	144178208	L1PA7:L1:LINE	-	Exonic	chr6	144175205	144177090	AX746989	+	Non-DE	SRR6368546	Deneault et al. - iPSC	CHD8
chr6	144172713	144178208	L1PA7:L1:LINE	-	Exonic	chr6	144175205	144177090	AX746989	+	Non-DE	SRR6368547	Deneault et al. - iPSC	CHD8
chr7	12536837	12542864	L1PA3:L1:LINE	+	Intronic	chr7	12596186	12596356	BC075797	+	Non-DE	SRR6368544	Deneault et al. - iPSC	CHD8
chr7	39047127	39053152	L1PA2:L1:LINE	-	Exonic	chr7	39053012	39053161	POU6F2-AS2	-	Non-DE	SRR6368546	Deneault et al. - iPSC	CHD8
chr7	39047127	39053152	L1PA2:L1:LINE	-	Exonic	chr7	39053012	39053161	POU6F2-AS2	-	Non-DE	SRR6368544	Deneault et al. - iPSC	CHD8
chr7	86669072	86675084	L1PA2:L1:LINE	+	Intronic	chr7	86688640	86689014	ELAPOR2	-	Non-DE	SRR6368547	Deneault et al. - iPSC	CHD8
chr7	91813070	91819192	L1PA3:L1:LINE	-	Intronic	chr7	91808164	91809228	CYP51A1-AS1	+	Non-DE	SRR6368544	Deneault et al. - iPSC	CHD8
chr9	94976690	94982694	L1PA2:L1:LINE	+	Intronic	chr9	94984801	94984954	IARS1	-	Non-DE	SRR6368546	Deneault et al. - iPSC	CHD8
chr9	94976690	94982694	L1PA2:L1:LINE	+	Intronic	chr9	94984801	94984954	IARS1	-	Non-DE	SRR6368545	Deneault et al. - iPSC	CHD8
chr9	94976690	94982694	L1PA2:L1:LINE	+	Intronic	chr9	94984801	94984954	IARS1	-	Non-DE	SRR6368544	Deneault et al. - iPSC	CHD8
chr1	143125606	143131754	L1PA2:L1:LINE	-	Intronic	chr1	143119060	143119119	RP11-782C8.1	+	Non-DE	SRR6368535	Deneault et al. - iPSC	DLGAP2
chr1	149923964	149930070	L1PA5:L1:LINE	-	Intronic	chr1	149931602	149931715	OTUD7B	-	Non-DE	SRR6368535	Deneault et al. - iPSC	DLGAP2
chr10	33201104	33207283	L1PA5:L1:LINE	+	Exonic	chr10	33200813	33201052	ITGB1	-	Up-regulated	SRR6368530	Deneault et al. - iPSC	DLGAP2
chr10	33201104	33207283	L1PA5:L1:LINE	+	Exonic	chr10	33200813	33201052	ITGB1	-	Non-DE	SRR6368534	Deneault et al. - iPSC	DLGAP2
chr10	33201104	33207283	L1PA5:L1:LINE	+	Exonic	chr10	33200813	33201052	ITGB1	-	Up-regulated	SRR6368531	Deneault et al. - iPSC	DLGAP2
chr10	33201104	33207283	L1PA5:L1:LINE	+	Exonic	chr10	33200813	33201052	ITGB1	-	Non-DE	SRR6368535	Deneault et al. - iPSC	DLGAP2
chr10	55253766	55259783	L1PA3:L1:LINE	-	Intergenic	chr10	55580859	55583118	PCDH15	-	Non-DE	SRR6368530	Deneault et al. - iPSC	DLGAP2
chr10	55253766	55259783	L1PA3:L1:LINE	-	Intergenic	chr10	55580859	55583118	PCDH15	-	Non-DE	SRR6368531	Deneault et al. - iPSC	DLGAP2
chr10	86039723	86045762	L1PA2:L1:LINE	+	Exonic	chr10	86039735	86039821	LINC00858	+	Non-DE	SRR6368534	Deneault et al. - iPSC	DLGAP2
chr11	2655404	2661585	L1PA5:L1:LINE	-	Exonic	chr11	2629557	2721228	KCNQ1OT1	-	Non-DE	SRR6368531	Deneault et al. - iPSC	DLGAP2
chr11	11906779	11912696	L1PA10:L1:LINE	+	Intronic	chr11	11906013	11906127	USP47	+	Non-DE	SRR6368534	Deneault et al. - iPSC	DLGAP2
chr11	77037749	77042841	L1PA4:L1:LINE	+	Intronic	chr11	77043774	77043912	PAK1	-	Up-regulated	SRR6368535	Deneault et al. - iPSC	DLGAP2
chr11	77037749	77042841	L1PA4:L1:LINE	+	Intronic	chr11	77043774	77043912	PAK1	-	Up-regulated	SRR6368531	Deneault et al. - iPSC	DLGAP2
chr11	77037749	77042841	L1PA4:L1:LINE	+	Intronic	chr11	77043774	77043912	PAK1	-	Up-regulated	SRR6368530	Deneault et al. - iPSC	DLGAP2
chr11	77037749	77042841	L1PA4:L1:LINE	+	Intronic	chr11	77043774	77043912	PAK1	-	Up-regulated	SRR6368534	Deneault et al. - iPSC	DLGAP2
chr11	102239897	102245923	L1PA2:L1:LINE	-	Intronic	chr11	102239036	102239279	BIRC2	+	Non-DE	SRR6368534	Deneault et al. - iPSC	DLGAP2
chr11	108227658	108233694	L1PA2:L1:LINE	+	Intronic	chr11	108225537	108225601	ATM	+	Non-DE	SRR6368534	Deneault et al. - iPSC	DLGAP2
chr12	48068016	48073191	L1PA6:L1:LINE	+	Exonic	chr12	48073275	48073377	RPAP3	-	Non-DE	SRR6368534	Deneault et al. - iPSC	DLGAP2
chr15	63909208	63914241	L1PA4:L1:LINE	-	Intronic	chr15	63908628	63908881	HERC1	-	Non-DE	SRR6368535	Deneault et al. - iPSC	DLGAP2
chr15	81960854	81966845	L1PA2:L1:LINE	-	Intronic	chr15	81666329	81666418	TMC3	-	Non-DE	SRR6368530	Deneault et al. - iPSC	DLGAP2
chr15	81960854	81966845	L1PA2:L1:LINE	-	Intronic	chr15	81666329	81666418	TMC3	-	Non-DE	SRR6368531	Deneault et al. - iPSC	DLGAP2
chr15	82287507	82293537	L1PA2:L1:LINE	+	Intronic	chr15	82334118	82336954	MEX3B	-	Up-regulated	SRR6368534	Deneault et al. - iPSC	DLGAP2
chr15	97975923	97982079	L1PA3:L1:LINE	+	Intronic	chr15	97896726	97897019	RN7SL677P	+	Non-DE	SRR6368530	Deneault et al. - iPSC	DLGAP2
chr15	97975923	97982079	L1PA3:L1:LINE	+	Intronic	chr15	97896726	97897019	RN7SL677P	+	Non-DE	SRR6368531	Deneault et al. - iPSC	DLGAP2
chr18	75289711	75295821	L1PA6:L1:LINE	+	Intergenic	chr18	74980540	74982096	GALR1	+	Non-DE	SRR6368531	Deneault et al. - iPSC	DLGAP2
chr18	75289711	75295821	L1PA6:L1:LINE	+	Intergenic	chr18	74980540	74982096	GALR1	+	Non-DE	SRR6368534	Deneault et al. - iPSC	DLGAP2
chr18	75289711	75295821	L1PA6:L1:LINE	+	Intergenic	chr18	74980540	74982096	GALR1	+	Non-DE	SRR6368530	Deneault et al. - iPSC	DLGAP2
chr19	12017069	12022645	L1PA5:L1:LINE	+	Intronic	chr19	12015463	12015702	ZNF69	+	Non-DE	SRR6368534	Deneault et al. - iPSC	DLGAP2
chr2	95758488	95764597	L1PA6:L1:LINE	+	Intronic	chr2	95766218	95766281	MRPS5	-	Non-DE	SRR6368535	Deneault et al. - iPSC	DLGAP2
chr2	95758488	95764597	L1PA6:L1:LINE	+	Intronic	chr2	95766218	95766281	MRPS5	-	Up-regulated	SRR6368534	Deneault et al. - iPSC	DLGAP2
chr20	33659086	33665195	L1PA5:L1:LINE	-	Intronic	chr20	33665848	33665977	TRPC4AP	-	Non-DE	SRR6368534	Deneault et al. - iPSC	DLGAP2
chr20	33659086	33665195	L1PA5:L1:LINE	-	Intronic	chr20	33665848	33665977	TRPC4AP	-	Non-DE	SRR6368535	Deneault et al. - iPSC	DLGAP2
chr20	44100759	44107254	L1PA13:L1:LINE	-	Intronic	chr20	44108581	44108734	WFDC2	+	Up-regulated	SRR6368535	Deneault et al. - iPSC	DLGAP2
chr3	15433014	15439121	L1PA4:L1:LINE	-	Intronic	chr3	15451376	15452944	METTL6	-	Non-DE	SRR6368531	Deneault et al. - iPSC	DLGAP2
chr4	159638	165778	L1PA4:L1:LINE	-	Intronic	chr4	154701	156490	ZNF718	+	Non-DE	SRR6368530	Deneault et al. - iPSC	DLGAP2
chr4	159638	165778	L1PA4:L1:LINE	-	Intronic	chr4	154701	156490	ZNF718	+	Non-DE	SRR6368535	Deneault et al. - iPSC	DLGAP2
chr4	159638	165778	L1PA4:L1:LINE	-	Intronic	chr4	154701	156490	ZNF718	+	Non-DE	SRR6368535	Deneault et al. - iPSC	DLGAP2
chr4	159638	165778	L1PA4:L1:LINE	-	Intronic	chr4	154701	156490	ZNF718	+	Non-DE	SRR6368534	Deneault et al. - iPSC	DLGAP2
chr4	159638	165778	L1PA4:L1:LINE	-	Intronic	chr4	154701	156490	ZNF718	+	Non-DE	SRR6368534	Deneault et al. - iPSC	DLGAP2
chr4	159638	165778	L1PA4:L1:LINE	-	Intronic	chr4	154701	156490	ZNF718	+	Non-DE	SRR6368531	Deneault et al. - iPSC	DLGAP2
chr4	159638	165778	L1PA4:L1:LINE	-	Intronic	chr4	154701	156490	ZNF718	+	Non-DE	SRR6368531	Deneault et al. - iPSC	DLGAP2
chr4	159638	165778	L1PA4:L1:LINE	-	Intronic	chr4	154701	156490	ZNF718	+	Non-DE	SRR6368530	Deneault et al. - iPSC	DLGAP2
chr4	62620336	62626523	L1PA4:L1:LINE	-	Intronic	chr4	62598471	62599272	ADGRL3	+	Non-DE	SRR6368534	Deneault et al. - iPSC	DLGAP2
chr4	151192064	151198580	L1PA7:L1:LINE	+	Intronic	chr4	151199004	151199156	LRBA	-	Non-DE	SRR6368535	Deneault et al. - iPSC	DLGAP2
chr5	139831619	139837446	L1PA5:L1:LINE	+	Intronic	chr5	139838209	139838447	ANKHD1-EIF4EBP3	+	Non-DE	SRR6368535	Deneault et al. - iPSC	DLGAP2
chr6	79681232	79687246	L1PA3:L1:LINE	+	Intronic	chr6	79680497	79680605	PHIP	-	Non-DE	SRR6368534	Deneault et al. - iPSC	DLGAP2
chr6	91271827	91277941	L1PA5:L1:LINE	+	Intronic	chr6	91278276	91278342	MAP3K7	-	Non-DE	SRR6368535	Deneault et al. - iPSC	DLGAP2
chr6	91271827	91277941	L1PA5:L1:LINE	+	Intronic	chr6	91278276	91278342	MAP3K7	-	Non-DE	SRR6368534	Deneault et al. - iPSC	DLGAP2
chr6	91271827	91277941	L1PA5:L1:LINE	+	Intronic	chr6	91278276	91278342	MAP3K7	-	Non-DE	SRR6368531	Deneault et al. - iPSC	DLGAP2
chr6	116959859	116965997	L1PA3:L1:LINE	+	Intronic	chr6	116966876	116967097	ZUP1	-	Non-DE	SRR6368530	Deneault et al. - iPSC	DLGAP2
chr7	86669072	86675084	L1PA2:L1:LINE	+	Intronic	chr7	86688640	86689014	ELAPOR2	-	Non-DE	SRR6368535	Deneault et al. - iPSC	DLGAP2
chr7	91813070	91819192	L1PA3:L1:LINE	-	Intronic	chr7	91808164	91809228	CYP51A1-AS1	+	Non-DE	SRR6368534	Deneault et al. - iPSC	DLGAP2
chr7	91813070	91819192	L1PA3:L1:LINE	-	Intronic	chr7	91808164	91809228	CYP51A1-AS1	+	Non-DE	SRR6368531	Deneault et al. - iPSC	DLGAP2
chr8	11672377	11678511	L1PA6:L1:LINE	-	Intronic	chr8	11679258	11679387	FDFT1	+	Non-DE	SRR6368535	Deneault et al. - iPSC	DLGAP2
chr8	73968584	73974141	L1PA6:L1:LINE	+	Intronic	chr8	73976777	73979693	SBSPON	-	Up-regulated	SRR6368531	Deneault et al. - iPSC	DLGAP2
chr8	73968584	73974141	L1PA6:L1:LINE	+	Intronic	chr8	73976777	73979693	SBSPON	-	Non-DE	SRR6368535	Deneault et al. - iPSC	DLGAP2
chr8	73968584	73974141	L1PA6:L1:LINE	+	Intronic	chr8	73976777	73979693	SBSPON	-	Non-DE	SRR6368534	Deneault et al. - iPSC	DLGAP2
chr8	73968584	73974141	L1PA6:L1:LINE	+	Intronic	chr8	73976777	73979693	SBSPON	-	Up-regulated	SRR6368530	Deneault et al. - iPSC	DLGAP2
chr9	8324107	8330317	L1PA7:L1:LINE	-	Intronic	chr9	8331581	8331736	PTPRD	-	Non-DE	SRR6368535	Deneault et al. - iPSC	DLGAP2
chr9	8324107	8330317	L1PA7:L1:LINE	-	Intronic	chr9	8331581	8331736	PTPRD	-	Up-regulated	SRR6368534	Deneault et al. - iPSC	DLGAP2
chr9	72049710	72055847	L1PA4:L1:LINE	-	Intronic	chr9	72055911	72056031	APBA1	-	Non-DE	SRR6368535	Deneault et al. - iPSC	DLGAP2
chr9	94976690	94982694	L1PA2:L1:LINE	+	Intronic	chr9	94984801	94984954	IARS1	-	Non-DE	SRR6368531	Deneault et al. - iPSC	DLGAP2
chr9	94976690	94982694	L1PA2:L1:LINE	+	Intronic	chr9	94984801	94984954	IARS1	-	Non-DE	SRR6368535	Deneault et al. - iPSC	DLGAP2
chr9	94976690	94982694	L1PA2:L1:LINE	+	Intronic	chr9	94984801	94984954	IARS1	-	Non-DE	SRR6368534	Deneault et al. - iPSC	DLGAP2
chr9	94976690	94982694	L1PA2:L1:LINE	+	Intronic	chr9	94984801	94984954	IARS1	-	Non-DE	SRR6368530	Deneault et al. - iPSC	DLGAP2
chr9	96875817	96881847	L1HS:L1:LINE	-	Intronic	chr9	96870109	96872138	PTPDC1	+	Non-DE	SRR6368535	Deneault et al. - iPSC	DLGAP2
chr9	115750430	115756749	L1PA10:L1:LINE	-	Intronic	chr9	115759399	115761418	ZNF883	-	Non-DE	SRR6368534	Deneault et al. - iPSC	DLGAP2
chrUn_gl000214	39518	45655	L1PA3:L1:LINE	-	Intergenic	chrUn_gl000214	32576	32635	BC012753	+	Non-DE	SRR6368530	Deneault et al. - iPSC	DLGAP2
chrUn_gl000214	39518	45655	L1PA3:L1:LINE	-	Intergenic	chrUn_gl000214	32576	32635	BC012753	+	Non-DE	SRR6368534	Deneault et al. - iPSC	DLGAP2
chrUn_gl000214	39518	45655	L1PA3:L1:LINE	-	Intergenic	chrUn_gl000214	32576	32635	BC012753	+	Non-DE	SRR6368531	Deneault et al. - iPSC	DLGAP2
chrY	14959405	14965588	L1PA6:L1:LINE	-	Intronic	chrY	14959163	14959252	USP9Y	+	Non-DE	SRR6368531	Deneault et al. - iPSC	DLGAP2
chrY	14959405	14965588	L1PA6:L1:LINE	-	Intronic	chrY	14959163	14959252	USP9Y	+	Non-DE	SRR6368534	Deneault et al. - iPSC	DLGAP2
chr1	121316087	121322219	L1PA3:L1:LINE	+	Intronic	chr1	121310573	121313686	EMBP1	+	Non-DE	SRR6368543	Deneault et al. - iPSC	KCNQ2
chr10	33201104	33207283	L1PA5:L1:LINE	+	Exonic	chr10	33200813	33201052	ITGB1	-	Up-regulated	SRR6368540	Deneault et al. - iPSC	KCNQ2
chr10	33201104	33207283	L1PA5:L1:LINE	+	Exonic	chr10	33200813	33201052	ITGB1	-	Non-DE	SRR6368541	Deneault et al. - iPSC	KCNQ2
chr10	33201104	33207283	L1PA5:L1:LINE	+	Exonic	chr10	33200813	33201052	ITGB1	-	Non-DE	SRR6368542	Deneault et al. - iPSC	KCNQ2
chr10	33201104	33207283	L1PA5:L1:LINE	+	Exonic	chr10	33200813	33201052	ITGB1	-	Non-DE	SRR6368543	Deneault et al. - iPSC	KCNQ2
chr11	14616306	14622422	L1PA6:L1:LINE	-	Intronic	chr11	14665268	14666599	PDE3B	+	Non-DE	SRR6368543	Deneault et al. - iPSC	KCNQ2
chr11	77037749	77042841	L1PA4:L1:LINE	+	Intronic	chr11	77043774	77043912	PAK1	-	Non-DE	SRR6368543	Deneault et al. - iPSC	KCNQ2
chr11	77037749	77042841	L1PA4:L1:LINE	+	Intronic	chr11	77043774	77043912	PAK1	-	Non-DE	SRR6368542	Deneault et al. - iPSC	KCNQ2
chr11	77037749	77042841	L1PA4:L1:LINE	+	Intronic	chr11	77043774	77043912	PAK1	-	Non-DE	SRR6368541	Deneault et al. - iPSC	KCNQ2
chr11	77037749	77042841	L1PA4:L1:LINE	+	Intronic	chr11	77043774	77043912	PAK1	-	Non-DE	SRR6368540	Deneault et al. - iPSC	KCNQ2
chr15	63909208	63914241	L1PA4:L1:LINE	-	Intronic	chr15	63908628	63908881	HERC1	-	Non-DE	SRR6368540	Deneault et al. - iPSC	KCNQ2
chr15	63909208	63914241	L1PA4:L1:LINE	-	Intronic	chr15	63908628	63908881	HERC1	-	Non-DE	SRR6368541	Deneault et al. - iPSC	KCNQ2
chr15	63909208	63914241	L1PA4:L1:LINE	-	Intronic	chr15	63908628	63908881	HERC1	-	Non-DE	SRR6368542	Deneault et al. - iPSC	KCNQ2
chr15	81960854	81966845	L1PA2:L1:LINE	-	Intronic	chr15	81666329	81666418	TMC3	-	Non-DE	SRR6368540	Deneault et al. - iPSC	KCNQ2
chr15	81960854	81966845	L1PA2:L1:LINE	-	Intronic	chr15	81666329	81666418	TMC3	-	Non-DE	SRR6368543	Deneault et al. - iPSC	KCNQ2
chr15	97975923	97982079	L1PA3:L1:LINE	+	Intronic	chr15	97896726	97897019	RN7SL677P	+	Non-DE	SRR6368543	Deneault et al. - iPSC	KCNQ2
chr20	44100759	44107254	L1PA13:L1:LINE	-	Intronic	chr20	44108581	44108734	WFDC2	+	Up-regulated	SRR6368543	Deneault et al. - iPSC	KCNQ2
chr3	51681874	51687951	L1PA6:L1:LINE	+	Intronic	chr3	51680300	51680497	RAD54L2	+	Non-DE	SRR6368543	Deneault et al. - iPSC	KCNQ2
chr3	51681874	51687951	L1PA6:L1:LINE	+	Intronic	chr3	51680300	51680497	RAD54L2	+	Non-DE	SRR6368540	Deneault et al. - iPSC	KCNQ2
chr3	134971056	134977072	L1PA2:L1:LINE	-	Intronic	chr3	134977853	134979307	EPHB1	+	Up-regulated	SRR6368543	Deneault et al. - iPSC	KCNQ2
chr4	21771611	21778019	L1PA8A:L1:LINE	-	Intronic	chr4	21844963	21854811	KCNIP4-IT1	-	Non-DE	SRR6368541	Deneault et al. - iPSC	KCNQ2
chr4	151192064	151198580	L1PA7:L1:LINE	+	Intronic	chr4	151199004	151199156	LRBA	-	Non-DE	SRR6368541	Deneault et al. - iPSC	KCNQ2
chr4	151192064	151198580	L1PA7:L1:LINE	+	Intronic	chr4	151199004	151199156	LRBA	-	Non-DE	SRR6368540	Deneault et al. - iPSC	KCNQ2
chr4	151192064	151198580	L1PA7:L1:LINE	+	Intronic	chr4	151199004	151199156	LRBA	-	Non-DE	SRR6368542	Deneault et al. - iPSC	KCNQ2
chr4	151192064	151198580	L1PA7:L1:LINE	+	Intronic	chr4	151199004	151199156	LRBA	-	Non-DE	SRR6368543	Deneault et al. - iPSC	KCNQ2
chr6	91271827	91277941	L1PA5:L1:LINE	+	Intronic	chr6	91278276	91278342	MAP3K7	-	Non-DE	SRR6368543	Deneault et al. - iPSC	KCNQ2
chr6	116959859	116965997	L1PA3:L1:LINE	+	Intronic	chr6	116966876	116967097	ZUP1	-	Non-DE	SRR6368540	Deneault et al. - iPSC	KCNQ2
chr7	91813070	91819192	L1PA3:L1:LINE	-	Intronic	chr7	91808164	91809228	CYP51A1-AS1	+	Non-DE	SRR6368542	Deneault et al. - iPSC	KCNQ2
chr9	8324107	8330317	L1PA7:L1:LINE	-	Intronic	chr9	8331581	8331736	PTPRD	-	Non-DE	SRR6368542	Deneault et al. - iPSC	KCNQ2
chr9	8324107	8330317	L1PA7:L1:LINE	-	Intronic	chr9	8331581	8331736	PTPRD	-	Down-regulated	SRR6368543	Deneault et al. - iPSC	KCNQ2
chr9	94976690	94982694	L1PA2:L1:LINE	+	Intronic	chr9	94984801	94984954	IARS1	-	Non-DE	SRR6368540	Deneault et al. - iPSC	KCNQ2
chr9	94976690	94982694	L1PA2:L1:LINE	+	Intronic	chr9	94984801	94984954	IARS1	-	Non-DE	SRR6368542	Deneault et al. - iPSC	KCNQ2
chr9	94976690	94982694	L1PA2:L1:LINE	+	Intronic	chr9	94984801	94984954	IARS1	-	Non-DE	SRR6368543	Deneault et al. - iPSC	KCNQ2
chr9	94976690	94982694	L1PA2:L1:LINE	+	Intronic	chr9	94984801	94984954	IARS1	-	Non-DE	SRR6368541	Deneault et al. - iPSC	KCNQ2
chr1	121316087	121322219	L1PA3:L1:LINE	+	Intronic	chr1	121310573	121313686	EMBP1	+	Non-DE	SRR6368551	Deneault et al. - iPSC	SCN2A
chr1	121316087	121322219	L1PA3:L1:LINE	+	Intronic	chr1	121310573	121313686	EMBP1	+	Non-DE	SRR6368552	Deneault et al. - iPSC	SCN2A
chr1	121316087	121322219	L1PA3:L1:LINE	+	Intronic	chr1	121310573	121313686	EMBP1	+	Non-DE	SRR6368550	Deneault et al. - iPSC	SCN2A
chr1	121316087	121322219	L1PA3:L1:LINE	+	Intronic	chr1	121310573	121313686	EMBP1	+	Non-DE	SRR6368553	Deneault et al. - iPSC	SCN2A
chr10	33201104	33207283	L1PA5:L1:LINE	+	Exonic	chr10	33200813	33201052	ITGB1	-	Non-DE	SRR6368553	Deneault et al. - iPSC	SCN2A
chr10	118692681	118699122	L1PA7:L1:LINE	-	Intronic	chr10	118699976	118700123	SHTN1	-	Non-DE	SRR6368550	Deneault et al. - iPSC	SCN2A
chr11	2655404	2661585	L1PA5:L1:LINE	-	Exonic	chr11	2629557	2721228	KCNQ1OT1	-	Non-DE	SRR6368550	Deneault et al. - iPSC	SCN2A
chr11	14616306	14622422	L1PA6:L1:LINE	-	Intronic	chr11	14665268	14666599	PDE3B	+	Non-DE	SRR6368552	Deneault et al. - iPSC	SCN2A
chr11	14616306	14622422	L1PA6:L1:LINE	-	Intronic	chr11	14665268	14666599	PDE3B	+	Non-DE	SRR6368550	Deneault et al. - iPSC	SCN2A
chr11	77037749	77042841	L1PA4:L1:LINE	+	Intronic	chr11	77043774	77043912	PAK1	-	Non-DE	SRR6368553	Deneault et al. - iPSC	SCN2A
chr11	77037749	77042841	L1PA4:L1:LINE	+	Intronic	chr11	77043774	77043912	PAK1	-	Non-DE	SRR6368552	Deneault et al. - iPSC	SCN2A
chr11	77037749	77042841	L1PA4:L1:LINE	+	Intronic	chr11	77043774	77043912	PAK1	-	Non-DE	SRR6368551	Deneault et al. - iPSC	SCN2A
chr11	77037749	77042841	L1PA4:L1:LINE	+	Intronic	chr11	77043774	77043912	PAK1	-	Non-DE	SRR6368550	Deneault et al. - iPSC	SCN2A
chr14	41418121	41424139	L1PA3:L1:LINE	-	Exonic	chr14	41423915	41424157	LINC02315	+	Non-DE	SRR6368550	Deneault et al. - iPSC	SCN2A
chr14	41418121	41424139	L1PA3:L1:LINE	-	Exonic	chr14	41423915	41424157	LINC02315	+	Non-DE	SRR6368551	Deneault et al. - iPSC	SCN2A
chr14	41418121	41424139	L1PA3:L1:LINE	-	Exonic	chr14	41423915	41424157	LINC02315	+	Non-DE	SRR6368552	Deneault et al. - iPSC	SCN2A
chr14	41418121	41424139	L1PA3:L1:LINE	-	Exonic	chr14	41423915	41424157	LINC02315	+	Non-DE	SRR6368553	Deneault et al. - iPSC	SCN2A
chr14	55414793	55420840	L1PA5:L1:LINE	+	Intronic	chr14	55422278	55422412	WDHD1	-	Non-DE	SRR6368551	Deneault et al. - iPSC	SCN2A
chr14	55414793	55420840	L1PA5:L1:LINE	+	Intronic	chr14	55422278	55422412	WDHD1	-	Non-DE	SRR6368553	Deneault et al. - iPSC	SCN2A
chr15	25500760	25506894	L1PA5:L1:LINE	+	Intronic	chr15	25509673	25509726	SNORD115-45	+	Non-DE	SRR6368551	Deneault et al. - iPSC	SCN2A
chr15	25500760	25506894	L1PA5:L1:LINE	+	Intronic	chr15	25509673	25509726	SNORD115-45	+	Non-DE	SRR6368550	Deneault et al. - iPSC	SCN2A
chr15	25500760	25506894	L1PA5:L1:LINE	+	Intronic	chr15	25509673	25509726	SNORD115-45	+	Non-DE	SRR6368552	Deneault et al. - iPSC	SCN2A
chr15	25500760	25506894	L1PA5:L1:LINE	+	Intronic	chr15	25509673	25509726	SNORD115-45	+	Non-DE	SRR6368553	Deneault et al. - iPSC	SCN2A
chr15	81960854	81966845	L1PA2:L1:LINE	-	Intronic	chr15	81666329	81666418	TMC3	-	Non-DE	SRR6368551	Deneault et al. - iPSC	SCN2A
chr15	81960854	81966845	L1PA2:L1:LINE	-	Intronic	chr15	81666329	81666418	TMC3	-	Non-DE	SRR6368550	Deneault et al. - iPSC	SCN2A
chr15	81960854	81966845	L1PA2:L1:LINE	-	Intronic	chr15	81666329	81666418	TMC3	-	Non-DE	SRR6368552	Deneault et al. - iPSC	SCN2A
chr15	81960854	81966845	L1PA2:L1:LINE	-	Intronic	chr15	81666329	81666418	TMC3	-	Non-DE	SRR6368553	Deneault et al. - iPSC	SCN2A
chr15	97975923	97982079	L1PA3:L1:LINE	+	Intronic	chr15	97896726	97897019	RN7SL677P	+	Non-DE	SRR6368553	Deneault et al. - iPSC	SCN2A
chr15	97975923	97982079	L1PA3:L1:LINE	+	Intronic	chr15	97896726	97897019	RN7SL677P	+	Non-DE	SRR6368552	Deneault et al. - iPSC	SCN2A
chr15	97975923	97982079	L1PA3:L1:LINE	+	Intronic	chr15	97896726	97897019	RN7SL677P	+	Non-DE	SRR6368551	Deneault et al. - iPSC	SCN2A
chr15	97975923	97982079	L1PA3:L1:LINE	+	Intronic	chr15	97896726	97897019	RN7SL677P	+	Non-DE	SRR6368550	Deneault et al. - iPSC	SCN2A
chr16	50377250	50383321	L1PA5:L1:LINE	+	Intronic	chr16	50383933	50384078	BRD7	-	Non-DE	SRR6368553	Deneault et al. - iPSC	SCN2A
chr19	28186346	28192495	L1PA4:L1:LINE	-	Intronic	chr19	28221180	28223355	LINC00662	-	Non-DE	SRR6368550	Deneault et al. - iPSC	SCN2A
chr19	28186346	28192495	L1PA4:L1:LINE	-	Intronic	chr19	28221180	28223355	LINC00662	-	Non-DE	SRR6368553	Deneault et al. - iPSC	SCN2A
chr19	28186346	28192495	L1PA4:L1:LINE	-	Intronic	chr19	28221180	28223355	LINC00662	-	Non-DE	SRR6368552	Deneault et al. - iPSC	SCN2A
chr19	28186346	28192495	L1PA4:L1:LINE	-	Intronic	chr19	28221180	28223355	LINC00662	-	Non-DE	SRR6368551	Deneault et al. - iPSC	SCN2A
chr2	95758488	95764597	L1PA6:L1:LINE	+	Intronic	chr2	95766218	95766281	MRPS5	-	Non-DE	SRR6368552	Deneault et al. - iPSC	SCN2A
chr2	95758488	95764597	L1PA6:L1:LINE	+	Intronic	chr2	95766218	95766281	MRPS5	-	Up-regulated	SRR6368553	Deneault et al. - iPSC	SCN2A
chr20	33659086	33665195	L1PA5:L1:LINE	-	Intronic	chr20	33665848	33665977	TRPC4AP	-	Non-DE	SRR6368553	Deneault et al. - iPSC	SCN2A
chr20	52072101	52078105	L1PA3:L1:LINE	-	Intronic	chr20	52103682	52111869	TSHZ2	+	Non-DE	SRR6368551	Deneault et al. - iPSC	SCN2A
chr20	52072101	52078105	L1PA3:L1:LINE	-	Intronic	chr20	52103682	52111869	TSHZ2	+	Non-DE	SRR6368550	Deneault et al. - iPSC	SCN2A
chr20	52072101	52078105	L1PA3:L1:LINE	-	Intronic	chr20	52103682	52111869	TSHZ2	+	Non-DE	SRR6368552	Deneault et al. - iPSC	SCN2A
chr3	27857474	27863474	L1PA7:L1:LINE	-	Intronic	chr3	27872378	27875073	LINC01981	-	Non-DE	SRR6368551	Deneault et al. - iPSC	SCN2A
chr3	27857474	27863474	L1PA7:L1:LINE	-	Intronic	chr3	27872378	27875073	LINC01981	-	Non-DE	SRR6368553	Deneault et al. - iPSC	SCN2A
chr3	51681874	51687951	L1PA6:L1:LINE	+	Intronic	chr3	51680300	51680497	RAD54L2	+	Non-DE	SRR6368551	Deneault et al. - iPSC	SCN2A
chr3	51681874	51687951	L1PA6:L1:LINE	+	Intronic	chr3	51680300	51680497	RAD54L2	+	Non-DE	SRR6368550	Deneault et al. - iPSC	SCN2A
chr3	51681874	51687951	L1PA6:L1:LINE	+	Intronic	chr3	51680300	51680497	RAD54L2	+	Non-DE	SRR6368552	Deneault et al. - iPSC	SCN2A
chr3	108374358	108380495	L1PA4:L1:LINE	+	Intronic	chr3	108380723	108380819	DZIP3	+	Non-DE	SRR6368551	Deneault et al. - iPSC	SCN2A
chr3	134971056	134977072	L1PA2:L1:LINE	-	Intronic	chr3	134977853	134979307	EPHB1	+	Up-regulated	SRR6368553	Deneault et al. - iPSC	SCN2A
chr3	134971056	134977072	L1PA2:L1:LINE	-	Intronic	chr3	134977853	134979307	EPHB1	+	Up-regulated	SRR6368552	Deneault et al. - iPSC	SCN2A
chr3	134971056	134977072	L1PA2:L1:LINE	-	Intronic	chr3	134977853	134979307	EPHB1	+	Up-regulated	SRR6368551	Deneault et al. - iPSC	SCN2A
chr3	134971056	134977072	L1PA2:L1:LINE	-	Intronic	chr3	134977853	134979307	EPHB1	+	Up-regulated	SRR6368550	Deneault et al. - iPSC	SCN2A
chr5	74002130	74008268	L1PA3:L1:LINE	+	Intronic	chr5	74001043	74001145	HEXB	+	Up-regulated	SRR6368550	Deneault et al. - iPSC	SCN2A
chr5	74002130	74008268	L1PA3:L1:LINE	+	Intronic	chr5	74001043	74001145	HEXB	+	Up-regulated	SRR6368551	Deneault et al. - iPSC	SCN2A
chr5	74002130	74008268	L1PA3:L1:LINE	+	Intronic	chr5	74001043	74001145	HEXB	+	Non-DE	SRR6368552	Deneault et al. - iPSC	SCN2A
chr5	74002130	74008268	L1PA3:L1:LINE	+	Intronic	chr5	74001043	74001145	HEXB	+	Up-regulated	SRR6368553	Deneault et al. - iPSC	SCN2A
chr6	76609458	76615462	L1PA3:L1:LINE	-	Intronic	chr6	76608089	76608128	MYO6	+	Non-DE	SRR6368551	Deneault et al. - iPSC	SCN2A
chr6	76609458	76615462	L1PA3:L1:LINE	-	Intronic	chr6	76608089	76608128	MYO6	+	Non-DE	SRR6368550	Deneault et al. - iPSC	SCN2A
chr6	76609458	76615462	L1PA3:L1:LINE	-	Intronic	chr6	76608089	76608128	MYO6	+	Non-DE	SRR6368552	Deneault et al. - iPSC	SCN2A
chr6	91271827	91277941	L1PA5:L1:LINE	+	Intronic	chr6	91278276	91278342	MAP3K7	-	Non-DE	SRR6368553	Deneault et al. - iPSC	SCN2A
chr6	116959859	116965997	L1PA3:L1:LINE	+	Intronic	chr6	116966876	116967097	ZUP1	-	Non-DE	SRR6368551	Deneault et al. - iPSC	SCN2A
chr6	144172713	144178208	L1PA7:L1:LINE	-	Exonic	chr6	144175205	144177090	AX746989	+	Non-DE	SRR6368550	Deneault et al. - iPSC	SCN2A
chr6	144172713	144178208	L1PA7:L1:LINE	-	Exonic	chr6	144175205	144177090	AX746989	+	Non-DE	SRR6368551	Deneault et al. - iPSC	SCN2A
chr6	144172713	144178208	L1PA7:L1:LINE	-	Exonic	chr6	144175205	144177090	AX746989	+	Non-DE	SRR6368552	Deneault et al. - iPSC	SCN2A
chr7	86669072	86675084	L1PA2:L1:LINE	+	Intronic	chr7	86688640	86689014	ELAPOR2	-	Non-DE	SRR6368551	Deneault et al. - iPSC	SCN2A
chr7	86669072	86675084	L1PA2:L1:LINE	+	Intronic	chr7	86688640	86689014	ELAPOR2	-	Non-DE	SRR6368553	Deneault et al. - iPSC	SCN2A
chr9	94976690	94982694	L1PA2:L1:LINE	+	Intronic	chr9	94984801	94984954	IARS1	-	Non-DE	SRR6368553	Deneault et al. - iPSC	SCN2A
chr9	94976690	94982694	L1PA2:L1:LINE	+	Intronic	chr9	94984801	94984954	IARS1	-	Non-DE	SRR6368551	Deneault et al. - iPSC	SCN2A
chr9	94976690	94982694	L1PA2:L1:LINE	+	Intronic	chr9	94984801	94984954	IARS1	-	Non-DE	SRR6368550	Deneault et al. - iPSC	SCN2A
chrX	73253778	73259910	L1PA5:L1:LINE	-	Intronic	chrX	73251430	73251675	FTX	-	Non-DE	SRR6368550	Deneault et al. - iPSC	SCN2A
chrX	73253778	73259910	L1PA5:L1:LINE	-	Intronic	chrX	73251430	73251675	FTX	-	Non-DE	SRR6368552	Deneault et al. - iPSC	SCN2A
chrX	125319201	125325235	L1PA2:L1:LINE	-	Intergenic	chrX	125297481	125300080	DCAF12L2	-	Non-DE	SRR6368552	Deneault et al. - iPSC	SCN2A
chrX	125319201	125325235	L1PA2:L1:LINE	-	Intergenic	chrX	125297481	125300080	DCAF12L2	-	Non-DE	SRR6368551	Deneault et al. - iPSC	SCN2A
chrX	125319201	125325235	L1PA2:L1:LINE	-	Intergenic	chrX	125297481	125300080	DCAF12L2	-	Non-DE	SRR6368550	Deneault et al. - iPSC	SCN2A
chr10	33201104	33207283	L1PA5:L1:LINE	+	Exonic	chr10	33200813	33201052	ITGB1	-	Up-regulated	SRR6368538	Deneault et al. - iPSC	TENM1
chr10	33201104	33207283	L1PA5:L1:LINE	+	Exonic	chr10	33200813	33201052	ITGB1	-	Up-regulated	SRR6368539	Deneault et al. - iPSC	TENM1
chr10	55253766	55259783	L1PA3:L1:LINE	-	Intergenic	chr10	55580859	55583118	PCDH15	-	Non-DE	SRR6368539	Deneault et al. - iPSC	TENM1
chr10	55253766	55259783	L1PA3:L1:LINE	-	Intergenic	chr10	55580859	55583118	PCDH15	-	Non-DE	SRR6368538	Deneault et al. - iPSC	TENM1
chr11	77037749	77042841	L1PA4:L1:LINE	+	Intronic	chr11	77043774	77043912	PAK1	-	Up-regulated	SRR6368539	Deneault et al. - iPSC	TENM1
chr11	77037749	77042841	L1PA4:L1:LINE	+	Intronic	chr11	77043774	77043912	PAK1	-	Up-regulated	SRR6368538	Deneault et al. - iPSC	TENM1
chr11	95169380	95175410	L1HS:L1:LINE	+	Intergenic	chr11	95257193	95257298	5S_rRNA	-	Non-DE	SRR6368539	Deneault et al. - iPSC	TENM1
chr13	49039691	49045702	L1HS:L1:LINE	+	Intronic	chr13	49039340	49039504	RB1	+	Non-DE	SRR6368538	Deneault et al. - iPSC	TENM1
chr15	56426816	56432826	L1PA2:L1:LINE	-	Intronic	chr15	56434975	56435098	RFX7	-	Non-DE	SRR6368539	Deneault et al. - iPSC	TENM1
chr15	63909208	63914241	L1PA4:L1:LINE	-	Intronic	chr15	63908628	63908881	HERC1	-	Non-DE	SRR6368538	Deneault et al. - iPSC	TENM1
chr15	81960854	81966845	L1PA2:L1:LINE	-	Intronic	chr15	81666329	81666418	TMC3	-	Non-DE	SRR6368538	Deneault et al. - iPSC	TENM1
chr18	53382715	53388760	L1PA2:L1:LINE	-	Intronic	chr18	53443957	53447261	LINC01415	-	Non-DE	SRR6368538	Deneault et al. - iPSC	TENM1
chr4	159638	165778	L1PA4:L1:LINE	-	Intronic	chr4	154701	156490	ZNF718	+	Non-DE	SRR6368538	Deneault et al. - iPSC	TENM1
chr4	159638	165778	L1PA4:L1:LINE	-	Intronic	chr4	154701	156490	ZNF718	+	Non-DE	SRR6368538	Deneault et al. - iPSC	TENM1
chr4	159638	165778	L1PA4:L1:LINE	-	Intronic	chr4	154701	156490	ZNF718	+	Non-DE	SRR6368539	Deneault et al. - iPSC	TENM1
chr4	159638	165778	L1PA4:L1:LINE	-	Intronic	chr4	154701	156490	ZNF718	+	Non-DE	SRR6368539	Deneault et al. - iPSC	TENM1
chr4	62620336	62626523	L1PA4:L1:LINE	-	Intronic	chr4	62598471	62599272	ADGRL3	+	Non-DE	SRR6368539	Deneault et al. - iPSC	TENM1
chr4	62620336	62626523	L1PA4:L1:LINE	-	Intronic	chr4	62598471	62599272	ADGRL3	+	Non-DE	SRR6368538	Deneault et al. - iPSC	TENM1
chr4	69285971	69292051	L1PA6:L1:LINE	+	Intergenic	chr4	69313166	69313241	TMPRSS11E	+	Non-DE	SRR6368538	Deneault et al. - iPSC	TENM1
chr4	69285971	69292051	L1PA6:L1:LINE	+	Intergenic	chr4	69313166	69313241	TMPRSS11E	+	Non-DE	SRR6368539	Deneault et al. - iPSC	TENM1
chr4	167664640	167670800	L1PA5:L1:LINE	+	Intronic	chr4	167663147	167663210	SPOCK3	-	Up-regulated	SRR6368538	Deneault et al. - iPSC	TENM1
chr4	167664640	167670800	L1PA5:L1:LINE	+	Intronic	chr4	167663147	167663210	SPOCK3	-	Up-regulated	SRR6368539	Deneault et al. - iPSC	TENM1
chr6	91271827	91277941	L1PA5:L1:LINE	+	Intronic	chr6	91278276	91278342	MAP3K7	-	Up-regulated	SRR6368539	Deneault et al. - iPSC	TENM1
chr6	91271827	91277941	L1PA5:L1:LINE	+	Intronic	chr6	91278276	91278342	MAP3K7	-	Up-regulated	SRR6368538	Deneault et al. - iPSC	TENM1
chr6	98242519	98248408	L1PA4:L1:LINE	+	Intronic	chr6	98155562	98156726	RP11-436D23.1	+	Non-DE	SRR6368539	Deneault et al. - iPSC	TENM1
chr6	98242519	98248408	L1PA4:L1:LINE	+	Intronic	chr6	98155562	98156726	RP11-436D23.1	+	Non-DE	SRR6368538	Deneault et al. - iPSC	TENM1
chr6	116959859	116965997	L1PA3:L1:LINE	+	Intronic	chr6	116966876	116967097	ZUP1	-	Non-DE	SRR6368539	Deneault et al. - iPSC	TENM1
chr6	116959859	116965997	L1PA3:L1:LINE	+	Intronic	chr6	116966876	116967097	ZUP1	-	Non-DE	SRR6368538	Deneault et al. - iPSC	TENM1
chr7	91813070	91819192	L1PA3:L1:LINE	-	Intronic	chr7	91808164	91809228	CYP51A1-AS1	+	Non-DE	SRR6368538	Deneault et al. - iPSC	TENM1
chr8	73968584	73974141	L1PA6:L1:LINE	+	Intronic	chr8	73976777	73979693	SBSPON	-	Up-regulated	SRR6368538	Deneault et al. - iPSC	TENM1
chr8	73968584	73974141	L1PA6:L1:LINE	+	Intronic	chr8	73976777	73979693	SBSPON	-	Up-regulated	SRR6368539	Deneault et al. - iPSC	TENM1
chr9	94976690	94982694	L1PA2:L1:LINE	+	Intronic	chr9	94984801	94984954	IARS1	-	Non-DE	SRR6368539	Deneault et al. - iPSC	TENM1
chr9	94976690	94982694	L1PA2:L1:LINE	+	Intronic	chr9	94984801	94984954	IARS1	-	Non-DE	SRR6368538	Deneault et al. - iPSC	TENM1
chrUn_gl000214	39518	45655	L1PA3:L1:LINE	-	Intergenic	chrUn_gl000214	32576	32635	BC012753	+	Non-DE	SRR6368539	Deneault et al. - iPSC	TENM1
chrX	11725368	11731399	L1HS:L1:LINE	+	Intronic	chrX	11682360	11683821	ARHGAP6	-	Non-DE	SRR6368539	Deneault et al. - iPSC	TENM1
chr1	92853959	92860042	L1PA7:L1:LINE	+	Intronic	chr1	92852567	92853732	RPAP2	+	Up-regulated	SRR6368582	Deneault et al. - Neuron	AFF2
chr1	119563254	119569271	L1PA3:L1:LINE	+	Intergenic	chr1	119573838	119575982	WARS2	-	Non-DE	SRR6368578	Deneault et al. - Neuron	AFF2
chr1	143125606	143131754	L1PA2:L1:LINE	-	Intronic	chr1	143119060	143119119	RP11-782C8.1	+	Non-DE	SRR6368591	Deneault et al. - Neuron	AFF2
chr1	143125606	143131754	L1PA2:L1:LINE	-	Intronic	chr1	143119060	143119119	RP11-782C8.1	+	Non-DE	SRR6368582	Deneault et al. - Neuron	AFF2
chr1	220814954	220821404	L1PA10:L1:LINE	+	Intronic	chr1	220823961	220824062	MARK1	+	Non-DE	SRR6368582	Deneault et al. - Neuron	AFF2
chr10	86039723	86045762	L1PA2:L1:LINE	+	Exonic	chr10	86039735	86039821	LINC00858	+	Non-DE	SRR6368590	Deneault et al. - Neuron	AFF2
chr10	96865055	96871181	L1PA6:L1:LINE	-	Intronic	chr10	96828991	96829254	CYP2C8	-	Non-DE	SRR6368578	Deneault et al. - Neuron	AFF2
chr10	101400324	101406444	L1PA5:L1:LINE	-	Intergenic	chr10	101419262	101419345	ENTPD7	+	Up-regulated	SRR6368578	Deneault et al. - Neuron	AFF2
chr11	2655404	2661585	L1PA5:L1:LINE	-	Exonic	chr11	2629557	2721228	KCNQ1OT1	-	Non-DE	SRR6368578	Deneault et al. - Neuron	AFF2
chr11	14616306	14622422	L1PA6:L1:LINE	-	Intronic	chr11	14665268	14666599	PDE3B	+	Non-DE	SRR6368582	Deneault et al. - Neuron	AFF2
chr11	14616306	14622422	L1PA6:L1:LINE	-	Intronic	chr11	14665268	14666599	PDE3B	+	Non-DE	SRR6368578	Deneault et al. - Neuron	AFF2
chr11	43367651	43373668	L1PA2:L1:LINE	-	Intronic	chr11	43363977	43366080	API5	+	Non-DE	SRR6368590	Deneault et al. - Neuron	AFF2
chr11	95169380	95175410	L1HS:L1:LINE	+	Intergenic	chr11	95257193	95257298	5S_rRNA	-	Non-DE	SRR6368578	Deneault et al. - Neuron	AFF2
chr11	95169380	95175410	L1HS:L1:LINE	+	Intergenic	chr11	95257193	95257298	5S_rRNA	-	Non-DE	SRR6368591	Deneault et al. - Neuron	AFF2
chr11	95169380	95175410	L1HS:L1:LINE	+	Intergenic	chr11	95257193	95257298	5S_rRNA	-	Non-DE	SRR6368592	Deneault et al. - Neuron	AFF2
chr11	96138784	96144829	L1PA2:L1:LINE	-	Intronic	chr11	96123646	96126727	JRKL	+	Up-regulated	SRR6368582	Deneault et al. - Neuron	AFF2
chr11	96138784	96144829	L1PA2:L1:LINE	-	Intronic	chr11	96123646	96126727	JRKL	+	Up-regulated	SRR6368590	Deneault et al. - Neuron	AFF2
chr11	113094669	113100816	L1PA5:L1:LINE	+	Intronic	chr11	113101917	113101995	NCAM1	+	Non-DE	SRR6368578	Deneault et al. - Neuron	AFF2
chr12	4618061	4624067	L1PA2:L1:LINE	+	Intronic	chr12	4626226	4626355	C12orf4	-	Non-DE	SRR6368578	Deneault et al. - Neuron	AFF2
chr12	4618061	4624067	L1PA2:L1:LINE	+	Intronic	chr12	4626226	4626355	C12orf4	-	Non-DE	SRR6368591	Deneault et al. - Neuron	AFF2
chr12	4618061	4624067	L1PA2:L1:LINE	+	Intronic	chr12	4626226	4626355	C12orf4	-	Up-regulated	SRR6368582	Deneault et al. - Neuron	AFF2
chr12	4618061	4624067	L1PA2:L1:LINE	+	Intronic	chr12	4626226	4626355	C12orf4	-	Non-DE	SRR6368590	Deneault et al. - Neuron	AFF2
chr12	4781112	4787459	L1PA7:L1:LINE	+	Intronic	chr12	4778906	4778983	NDUFA9	+	Non-DE	SRR6368582	Deneault et al. - Neuron	AFF2
chr12	5225592	5231594	L1PA2:L1:LINE	-	Intergenic	chr12	5153084	5155954	KCNA5	+	Non-DE	SRR6368590	Deneault et al. - Neuron	AFF2
chr12	5225592	5231594	L1PA2:L1:LINE	-	Intergenic	chr12	5153084	5155954	KCNA5	+	Non-DE	SRR6368582	Deneault et al. - Neuron	AFF2
chr12	5225592	5231594	L1PA2:L1:LINE	-	Intergenic	chr12	5153084	5155954	KCNA5	+	Non-DE	SRR6368591	Deneault et al. - Neuron	AFF2
chr12	5225592	5231594	L1PA2:L1:LINE	-	Intergenic	chr12	5153084	5155954	KCNA5	+	Non-DE	SRR6368578	Deneault et al. - Neuron	AFF2
chr12	48068016	48073191	L1PA6:L1:LINE	+	Exonic	chr12	48073275	48073377	RPAP3	-	Up-regulated	SRR6368582	Deneault et al. - Neuron	AFF2
chr12	79433401	79439425	L1PA2:L1:LINE	-	Exonic	chr12	79439432	79439606	SYT1	+	Non-DE	SRR6368582	Deneault et al. - Neuron	AFF2
chr12	79433401	79439425	L1PA2:L1:LINE	-	Exonic	chr12	79439432	79439606	SYT1	+	Non-DE	SRR6368590	Deneault et al. - Neuron	AFF2
chr12	79433401	79439425	L1PA2:L1:LINE	-	Exonic	chr12	79439432	79439606	SYT1	+	Non-DE	SRR6368591	Deneault et al. - Neuron	AFF2
chr12	79433401	79439425	L1PA2:L1:LINE	-	Exonic	chr12	79439432	79439606	SYT1	+	Non-DE	SRR6368592	Deneault et al. - Neuron	AFF2
chr12	79433401	79439425	L1PA2:L1:LINE	-	Exonic	chr12	79439432	79439606	SYT1	+	Non-DE	SRR6368578	Deneault et al. - Neuron	AFF2
chr13	41438707	41444734	L1PA3:L1:LINE	-	Intronic	chr13	41486024	41486859	SUGT1P3	-	Non-DE	SRR6368582	Deneault et al. - Neuron	AFF2
chr14	20748206	20754353	L1PA4:L1:LINE	+	Intronic	chr14	20757300	20757905	TTC5	-	Up-regulated	SRR6368582	Deneault et al. - Neuron	AFF2
chr14	55414793	55420840	L1PA5:L1:LINE	+	Intronic	chr14	55422278	55422412	WDHD1	-	Non-DE	SRR6368582	Deneault et al. - Neuron	AFF2
chr14	88922077	88928190	L1PA4:L1:LINE	-	Intronic	chr14	88932121	88934609	PTPN21	-	Non-DE	SRR6368582	Deneault et al. - Neuron	AFF2
chr15	28399917	28406027	L1PA5:L1:LINE	-	Intronic	chr15	28397822	28397976	HERC2	-	Up-regulated	SRR6368578	Deneault et al. - Neuron	AFF2
chr15	63909208	63914241	L1PA4:L1:LINE	-	Intronic	chr15	63908628	63908881	HERC1	-	Non-DE	SRR6368578	Deneault et al. - Neuron	AFF2
chr15	81960854	81966845	L1PA2:L1:LINE	-	Intronic	chr15	81666329	81666418	TMC3	-	Non-DE	SRR6368590	Deneault et al. - Neuron	AFF2
chr15	82090271	82096304	L1PA2:L1:LINE	+	Intronic	chr15	82334118	82336954	MEX3B	-	Non-DE	SRR6368578	Deneault et al. - Neuron	AFF2
chr15	82090271	82096304	L1PA2:L1:LINE	+	Intronic	chr15	82334118	82336954	MEX3B	-	Non-DE	SRR6368590	Deneault et al. - Neuron	AFF2
chr15	82090271	82096304	L1PA2:L1:LINE	+	Intronic	chr15	82334118	82336954	MEX3B	-	Non-DE	SRR6368591	Deneault et al. - Neuron	AFF2
chr15	82090271	82096304	L1PA2:L1:LINE	+	Intronic	chr15	82334118	82336954	MEX3B	-	Non-DE	SRR6368582	Deneault et al. - Neuron	AFF2
chr15	82090271	82096304	L1PA2:L1:LINE	+	Intronic	chr15	82334118	82336954	MEX3B	-	Non-DE	SRR6368592	Deneault et al. - Neuron	AFF2
chr15	82287507	82293537	L1PA2:L1:LINE	+	Intronic	chr15	82334118	82336954	MEX3B	-	Non-DE	SRR6368590	Deneault et al. - Neuron	AFF2
chr15	97975923	97982079	L1PA3:L1:LINE	+	Intronic	chr15	97896726	97897019	RN7SL677P	+	Non-DE	SRR6368590	Deneault et al. - Neuron	AFF2
chr15	97975923	97982079	L1PA3:L1:LINE	+	Intronic	chr15	97896726	97897019	RN7SL677P	+	Non-DE	SRR6368591	Deneault et al. - Neuron	AFF2
chr15	97975923	97982079	L1PA3:L1:LINE	+	Intronic	chr15	97896726	97897019	RN7SL677P	+	Non-DE	SRR6368592	Deneault et al. - Neuron	AFF2
chr16	18832575	18838378	L1HS:L1:LINE	-	Intronic	chr16	18839352	18839490	SMG1	-	Non-DE	SRR6368590	Deneault et al. - Neuron	AFF2
chr16	18832575	18838378	L1HS:L1:LINE	-	Intronic	chr16	18839352	18839490	SMG1	-	Up-regulated	SRR6368582	Deneault et al. - Neuron	AFF2
chr16	18832575	18838378	L1HS:L1:LINE	-	Intronic	chr16	18839352	18839490	SMG1	-	Non-DE	SRR6368578	Deneault et al. - Neuron	AFF2
chr16	82172856	82178863	L1PA2:L1:LINE	+	Intronic	chr16	82181766	82182468	MPHOSPH6	-	Up-regulated	SRR6368582	Deneault et al. - Neuron	AFF2
chr16	82172856	82178863	L1PA2:L1:LINE	+	Intronic	chr16	82181766	82182468	MPHOSPH6	-	Non-DE	SRR6368578	Deneault et al. - Neuron	AFF2
chr17	58958801	58964835	L1PA2:L1:LINE	-	Intronic	chr17	58967055	58967132	BCAS3	+	Non-DE	SRR6368582	Deneault et al. - Neuron	AFF2
chr18	53382715	53388760	L1PA2:L1:LINE	-	Intronic	chr18	53443957	53447261	LINC01415	-	Non-DE	SRR6368578	Deneault et al. - Neuron	AFF2
chr18	53382715	53388760	L1PA2:L1:LINE	-	Intronic	chr18	53443957	53447261	LINC01415	-	Non-DE	SRR6368582	Deneault et al. - Neuron	AFF2
chr18	53382715	53388760	L1PA2:L1:LINE	-	Intronic	chr18	53443957	53447261	LINC01415	-	Non-DE	SRR6368592	Deneault et al. - Neuron	AFF2
chr18	53382715	53388760	L1PA2:L1:LINE	-	Intronic	chr18	53443957	53447261	LINC01415	-	Non-DE	SRR6368591	Deneault et al. - Neuron	AFF2
chr18	53382715	53388760	L1PA2:L1:LINE	-	Intronic	chr18	53443957	53447261	LINC01415	-	Non-DE	SRR6368590	Deneault et al. - Neuron	AFF2
chr18	75127932	75133958	L1PA3:L1:LINE	-	Intronic	chr18	74980540	74982096	GALR1	+	Non-DE	SRR6368590	Deneault et al. - Neuron	AFF2
chr18	75127932	75133958	L1PA3:L1:LINE	-	Intronic	chr18	74980540	74982096	GALR1	+	Non-DE	SRR6368582	Deneault et al. - Neuron	AFF2
chr18	75289711	75295821	L1PA6:L1:LINE	+	Intergenic	chr18	74980540	74982096	GALR1	+	Non-DE	SRR6368578	Deneault et al. - Neuron	AFF2
chr18	75289711	75295821	L1PA6:L1:LINE	+	Intergenic	chr18	74980540	74982096	GALR1	+	Non-DE	SRR6368582	Deneault et al. - Neuron	AFF2
chr18	75289711	75295821	L1PA6:L1:LINE	+	Intergenic	chr18	74980540	74982096	GALR1	+	Non-DE	SRR6368590	Deneault et al. - Neuron	AFF2
chr2	24318027	24324128	L1PA6:L1:LINE	+	Intronic	chr2	24307058	24308085	TP53I3	-	Non-DE	SRR6368582	Deneault et al. - Neuron	AFF2
chr2	118380829	118386852	L1PA3:L1:LINE	+	Intergenic	chr2	118572254	118572438	DDX18	+	Non-DE	SRR6368590	Deneault et al. - Neuron	AFF2
chr2	118681259	118686848	L1PA4:L1:LINE	+	Intronic	chr2	118688612	118688726	CCDC93	-	Non-DE	SRR6368591	Deneault et al. - Neuron	AFF2
chr2	186284161	186290189	L1PA2:L1:LINE	-	Intronic	chr2	186411871	186411894	DD413621	-	Non-DE	SRR6368590	Deneault et al. - Neuron	AFF2
chr20	8575748	8581774	L1PA2:L1:LINE	-	Intronic	chr20	8608940	8609078	PLCB1	+	Non-DE	SRR6368590	Deneault et al. - Neuron	AFF2
chr20	8575748	8581774	L1PA2:L1:LINE	-	Intronic	chr20	8608940	8609078	PLCB1	+	Non-DE	SRR6368582	Deneault et al. - Neuron	AFF2
chr20	52072101	52078105	L1PA3:L1:LINE	-	Intronic	chr20	52103682	52111869	TSHZ2	+	Non-DE	SRR6368590	Deneault et al. - Neuron	AFF2
chr20	52120390	52126413	L1PA2:L1:LINE	+	Exonic	chr20	52120647	52120860	RP4-669H2.1	-	Non-DE	SRR6368590	Deneault et al. - Neuron	AFF2
chr22	22631182	22637196	L1PA3:L1:LINE	-	Intergenic	chr22	22652522	22652576	CH17-264L24.2	+	Non-DE	SRR6368582	Deneault et al. - Neuron	AFF2
chr3	15433014	15439121	L1PA4:L1:LINE	-	Intronic	chr3	15451376	15452944	METTL6	-	Non-DE	SRR6368578	Deneault et al. - Neuron	AFF2
chr3	27857474	27863474	L1PA7:L1:LINE	-	Intronic	chr3	27872378	27875073	LINC01981	-	Non-DE	SRR6368578	Deneault et al. - Neuron	AFF2
chr3	27857474	27863474	L1PA7:L1:LINE	-	Intronic	chr3	27872378	27875073	LINC01981	-	Non-DE	SRR6368582	Deneault et al. - Neuron	AFF2
chr3	27857474	27863474	L1PA7:L1:LINE	-	Intronic	chr3	27872378	27875073	LINC01981	-	Non-DE	SRR6368592	Deneault et al. - Neuron	AFF2
chr3	27857474	27863474	L1PA7:L1:LINE	-	Intronic	chr3	27872378	27875073	LINC01981	-	Non-DE	SRR6368590	Deneault et al. - Neuron	AFF2
chr3	43607314	43613339	L1PA2:L1:LINE	+	Exonic	chr3	43607144	43607219	ANO10	-	Non-DE	SRR6368590	Deneault et al. - Neuron	AFF2
chr3	58827880	58833905	L1PA2:L1:LINE	+	Intronic	chr3	58817411	58817615	CFAP20DC	-	Non-DE	SRR6368590	Deneault et al. - Neuron	AFF2
chr3	58827880	58833905	L1PA2:L1:LINE	+	Intronic	chr3	58817411	58817615	CFAP20DC	-	Non-DE	SRR6368591	Deneault et al. - Neuron	AFF2
chr3	58827880	58833905	L1PA2:L1:LINE	+	Intronic	chr3	58817411	58817615	CFAP20DC	-	Non-DE	SRR6368582	Deneault et al. - Neuron	AFF2
chr3	134971056	134977072	L1PA2:L1:LINE	-	Intronic	chr3	134977853	134979307	EPHB1	+	Non-DE	SRR6368578	Deneault et al. - Neuron	AFF2
chr3	134971056	134977072	L1PA2:L1:LINE	-	Intronic	chr3	134977853	134979307	EPHB1	+	Non-DE	SRR6368590	Deneault et al. - Neuron	AFF2
chr3	154951845	154958485	L1PA15:L1:LINE	-	Intergenic	chr3	154958733	154959414	LINC01487	+	Non-DE	SRR6368578	Deneault et al. - Neuron	AFF2
chr3	154951845	154958485	L1PA15:L1:LINE	-	Intergenic	chr3	154958733	154959414	LINC01487	+	Non-DE	SRR6368591	Deneault et al. - Neuron	AFF2
chr3	154951845	154958485	L1PA15:L1:LINE	-	Intergenic	chr3	154958733	154959414	LINC01487	+	Non-DE	SRR6368592	Deneault et al. - Neuron	AFF2
chr4	159638	165778	L1PA4:L1:LINE	-	Intronic	chr4	154701	156490	ZNF718	+	Non-DE	SRR6368582	Deneault et al. - Neuron	AFF2
chr4	159638	165778	L1PA4:L1:LINE	-	Intronic	chr4	154701	156490	ZNF718	+	Non-DE	SRR6368582	Deneault et al. - Neuron	AFF2
chr4	20740248	20746401	L1PA5:L1:LINE	+	Intronic	chr4	20736250	20736358	KCNIP4	-	Non-DE	SRR6368578	Deneault et al. - Neuron	AFF2
chr4	20740248	20746401	L1PA5:L1:LINE	+	Intronic	chr4	20736250	20736358	KCNIP4	-	Non-DE	SRR6368582	Deneault et al. - Neuron	AFF2
chr4	20740248	20746401	L1PA5:L1:LINE	+	Intronic	chr4	20736250	20736358	KCNIP4	-	Non-DE	SRR6368590	Deneault et al. - Neuron	AFF2
chr4	42043774	42050256	L1PA7:L1:LINE	+	Intronic	chr4	42051393	42051496	SLC30A9	+	Non-DE	SRR6368578	Deneault et al. - Neuron	AFF2
chr4	62620336	62626523	L1PA4:L1:LINE	-	Intronic	chr4	62598471	62599272	ADGRL3	+	Non-DE	SRR6368582	Deneault et al. - Neuron	AFF2
chr4	71919553	71925574	L1PA3:L1:LINE	-	Intergenic	chr4	71895068	71896629	DCK	+	Non-DE	SRR6368592	Deneault et al. - Neuron	AFF2
chr4	71919553	71925574	L1PA3:L1:LINE	-	Intergenic	chr4	71895068	71896629	DCK	+	Non-DE	SRR6368591	Deneault et al. - Neuron	AFF2
chr4	71919553	71925574	L1PA3:L1:LINE	-	Intergenic	chr4	71895068	71896629	DCK	+	Non-DE	SRR6368590	Deneault et al. - Neuron	AFF2
chr4	71919553	71925574	L1PA3:L1:LINE	-	Intergenic	chr4	71895068	71896629	DCK	+	Non-DE	SRR6368582	Deneault et al. - Neuron	AFF2
chr4	71919553	71925574	L1PA3:L1:LINE	-	Intergenic	chr4	71895068	71896629	DCK	+	Non-DE	SRR6368578	Deneault et al. - Neuron	AFF2
chr4	91596877	91602908	L1HS:L1:LINE	-	Intronic	chr4	91645064	91645142	CCSER1	+	Non-DE	SRR6368592	Deneault et al. - Neuron	AFF2
chr4	91596877	91602908	L1HS:L1:LINE	-	Intronic	chr4	91645064	91645142	CCSER1	+	Non-DE	SRR6368578	Deneault et al. - Neuron	AFF2
chr4	91596877	91602908	L1HS:L1:LINE	-	Intronic	chr4	91645064	91645142	CCSER1	+	Non-DE	SRR6368582	Deneault et al. - Neuron	AFF2
chr4	91596877	91602908	L1HS:L1:LINE	-	Intronic	chr4	91645064	91645142	CCSER1	+	Non-DE	SRR6368590	Deneault et al. - Neuron	AFF2
chr4	91596877	91602908	L1HS:L1:LINE	-	Intronic	chr4	91645064	91645142	CCSER1	+	Non-DE	SRR6368591	Deneault et al. - Neuron	AFF2
chr4	104171422	104177447	L1PA2:L1:LINE	-	Intronic	chr4	104119420	104119566	CENPE	-	Non-DE	SRR6368582	Deneault et al. - Neuron	AFF2
chr4	104171422	104177447	L1PA2:L1:LINE	-	Intronic	chr4	104119420	104119566	CENPE	-	Non-DE	SRR6368590	Deneault et al. - Neuron	AFF2
chr4	167664640	167670800	L1PA5:L1:LINE	+	Intronic	chr4	167663147	167663210	SPOCK3	-	Non-DE	SRR6368578	Deneault et al. - Neuron	AFF2
chr5	74002130	74008268	L1PA3:L1:LINE	+	Intronic	chr5	74001043	74001145	HEXB	+	Non-DE	SRR6368591	Deneault et al. - Neuron	AFF2
chr5	74002130	74008268	L1PA3:L1:LINE	+	Intronic	chr5	74001043	74001145	HEXB	+	Non-DE	SRR6368592	Deneault et al. - Neuron	AFF2
chr5	82753618	82759636	L1PA2:L1:LINE	-	Intergenic	chr5	82767492	82767842	VCAN	+	Non-DE	SRR6368590	Deneault et al. - Neuron	AFF2
chr5	82753618	82759636	L1PA2:L1:LINE	-	Intergenic	chr5	82767492	82767842	VCAN	+	Non-DE	SRR6368582	Deneault et al. - Neuron	AFF2
chr6	8770704	8776745	L1PA2:L1:LINE	-	Intronic	chr6	8710841	8712526	LOC100506207	+	Non-DE	SRR6368582	Deneault et al. - Neuron	AFF2
chr6	8770704	8776745	L1PA2:L1:LINE	-	Intronic	chr6	8710841	8712526	LOC100506207	+	Non-DE	SRR6368590	Deneault et al. - Neuron	AFF2
chr6	76609458	76615462	L1PA3:L1:LINE	-	Intronic	chr6	76608089	76608128	MYO6	+	Non-DE	SRR6368582	Deneault et al. - Neuron	AFF2
chr6	80287373	80293483	L1PA6:L1:LINE	+	Intergenic	chr6	80248450	80248479	DQ582269	+	Non-DE	SRR6368578	Deneault et al. - Neuron	AFF2
chr6	80287373	80293483	L1PA6:L1:LINE	+	Intergenic	chr6	80248450	80248479	DQ582269	+	Non-DE	SRR6368590	Deneault et al. - Neuron	AFF2
chr6	98242519	98248408	L1PA4:L1:LINE	+	Intronic	chr6	98155562	98156726	RP11-436D23.1	+	Non-DE	SRR6368582	Deneault et al. - Neuron	AFF2
chr7	12536837	12542864	L1PA3:L1:LINE	+	Intronic	chr7	12596186	12596356	BC075797	+	Non-DE	SRR6368582	Deneault et al. - Neuron	AFF2
chr7	12536837	12542864	L1PA3:L1:LINE	+	Intronic	chr7	12596186	12596356	BC075797	+	Non-DE	SRR6368590	Deneault et al. - Neuron	AFF2
chr7	39047127	39053152	L1PA2:L1:LINE	-	Exonic	chr7	39053012	39053161	POU6F2-AS2	-	Non-DE	SRR6368582	Deneault et al. - Neuron	AFF2
chr7	39047127	39053152	L1PA2:L1:LINE	-	Exonic	chr7	39053012	39053161	POU6F2-AS2	-	Non-DE	SRR6368590	Deneault et al. - Neuron	AFF2
chr7	91813070	91819192	L1PA3:L1:LINE	-	Intronic	chr7	91808164	91809228	CYP51A1-AS1	+	Non-DE	SRR6368578	Deneault et al. - Neuron	AFF2
chr7	91813070	91819192	L1PA3:L1:LINE	-	Intronic	chr7	91808164	91809228	CYP51A1-AS1	+	Non-DE	SRR6368582	Deneault et al. - Neuron	AFF2
chr8	43038791	43044885	L1PA5:L1:LINE	-	Intronic	chr8	43037287	43037403	HGSNAT	+	Non-DE	SRR6368578	Deneault et al. - Neuron	AFF2
chr8	70755535	70761658	L1PA5:L1:LINE	+	Intronic	chr8	70747088	70747299	SLCO5A1	-	Non-DE	SRR6368582	Deneault et al. - Neuron	AFF2
chr9	96875817	96881847	L1HS:L1:LINE	-	Intronic	chr9	96870109	96872138	PTPDC1	+	Up-regulated	SRR6368582	Deneault et al. - Neuron	AFF2
chrUn_gl000214	39518	45655	L1PA3:L1:LINE	-	Intergenic	chrUn_gl000214	32576	32635	BC012753	+	Non-DE	SRR6368591	Deneault et al. - Neuron	AFF2
chrX	11725368	11731399	L1HS:L1:LINE	+	Intronic	chrX	11682360	11683821	ARHGAP6	-	Up-regulated	SRR6368592	Deneault et al. - Neuron	AFF2
chrX	11725368	11731399	L1HS:L1:LINE	+	Intronic	chrX	11682360	11683821	ARHGAP6	-	Up-regulated	SRR6368591	Deneault et al. - Neuron	AFF2
chrX	11725368	11731399	L1HS:L1:LINE	+	Intronic	chrX	11682360	11683821	ARHGAP6	-	Down-regulated	SRR6368590	Deneault et al. - Neuron	AFF2
chrX	11725368	11731399	L1HS:L1:LINE	+	Intronic	chrX	11682360	11683821	ARHGAP6	-	Up-regulated	SRR6368582	Deneault et al. - Neuron	AFF2
chrX	11725368	11731399	L1HS:L1:LINE	+	Intronic	chrX	11682360	11683821	ARHGAP6	-	Down-regulated	SRR6368578	Deneault et al. - Neuron	AFF2
chrX	18123638	18129028	L1PA2:L1:LINE	+	Intergenic	chrX	18181050	18183343	BEND2	-	Non-DE	SRR6368590	Deneault et al. - Neuron	AFF2
chrX	73253778	73259910	L1PA5:L1:LINE	-	Intronic	chrX	73251430	73251675	FTX	-	Non-DE	SRR6368578	Deneault et al. - Neuron	AFF2
chrX	73291824	73297937	L1PA8:L1:LINE	-	Intronic	chrX	73251430	73251675	FTX	-	Non-DE	SRR6368590	Deneault et al. - Neuron	AFF2
chrX	73291824	73297937	L1PA8:L1:LINE	-	Intronic	chrX	73251430	73251675	FTX	-	Non-DE	SRR6368582	Deneault et al. - Neuron	AFF2
chrX	73291824	73297937	L1PA8:L1:LINE	-	Intronic	chrX	73251430	73251675	FTX	-	Non-DE	SRR6368578	Deneault et al. - Neuron	AFF2
chrX	128374838	128380974	L1PA4:L1:LINE	+	Intronic	chrX	128580477	128581278	SMARCA1	-	Down-regulated	SRR6368578	Deneault et al. - Neuron	AFF2
chrX	130712654	130718709	L1PA2:L1:LINE	+	Intronic	chrX	130678047	130678974	OR13H1	+	Non-DE	SRR6368578	Deneault et al. - Neuron	AFF2
chrX	130712654	130718709	L1PA2:L1:LINE	+	Intronic	chrX	130678047	130678974	OR13H1	+	Non-DE	SRR6368590	Deneault et al. - Neuron	AFF2
chrX	154583984	154589205	L1PA13:L1:LINE	+	Intergenic	chrX	154581173	154581271	RP13-228J13.1	-	Non-DE	SRR6368582	Deneault et al. - Neuron	AFF2
chr1	92853959	92860042	L1PA7:L1:LINE	+	Intronic	chr1	92852567	92853732	RPAP2	+	Up-regulated	SRR6368581	Deneault et al. - Neuron	ANOS1
chr10	101400324	101406444	L1PA5:L1:LINE	-	Intergenic	chr10	101419262	101419345	ENTPD7	+	Up-regulated	SRR6368581	Deneault et al. - Neuron	ANOS1
chr11	7679379	7685402	L1PA2:L1:LINE	-	Intergenic	chr11	7686325	7686777	CYB5R2	-	Up-regulated	SRR6368603	Deneault et al. - Neuron	ANOS1
chr11	58638766	58644895	L1PA4:L1:LINE	-	Intronic	chr11	58652423	58652497	AB231721	+	Non-DE	SRR6368603	Deneault et al. - Neuron	ANOS1
chr11	95169380	95175410	L1HS:L1:LINE	+	Intergenic	chr11	95257193	95257298	5S_rRNA	-	Non-DE	SRR6368603	Deneault et al. - Neuron	ANOS1
chr12	105401334	105407760	L1PA7:L1:LINE	-	Intronic	chr12	105413561	105418257	ALDH1L2	-	Non-DE	SRR6368581	Deneault et al. - Neuron	ANOS1
chr13	53289490	53295879	L1PA7:L1:LINE	-	Intronic	chr13	53298131	53298245	CNMD	-	Non-DE	SRR6368581	Deneault et al. - Neuron	ANOS1
chr15	28399917	28406027	L1PA5:L1:LINE	-	Intronic	chr15	28397822	28397976	HERC2	-	Up-regulated	SRR6368581	Deneault et al. - Neuron	ANOS1
chr15	82090271	82096304	L1PA2:L1:LINE	+	Intronic	chr15	82334118	82336954	MEX3B	-	Non-DE	SRR6368581	Deneault et al. - Neuron	ANOS1
chr15	82090271	82096304	L1PA2:L1:LINE	+	Intronic	chr15	82334118	82336954	MEX3B	-	Non-DE	SRR6368603	Deneault et al. - Neuron	ANOS1
chr15	82090271	82096304	L1PA2:L1:LINE	+	Intronic	chr15	82334118	82336954	MEX3B	-	Non-DE	SRR6368605	Deneault et al. - Neuron	ANOS1
chr15	82090271	82096304	L1PA2:L1:LINE	+	Intronic	chr15	82334118	82336954	MEX3B	-	Non-DE	SRR6368604	Deneault et al. - Neuron	ANOS1
chr16	18832575	18838378	L1HS:L1:LINE	-	Intronic	chr16	18839352	18839490	SMG1	-	Up-regulated	SRR6368581	Deneault et al. - Neuron	ANOS1
chr16	18832575	18838378	L1HS:L1:LINE	-	Intronic	chr16	18839352	18839490	SMG1	-	Non-DE	SRR6368603	Deneault et al. - Neuron	ANOS1
chr16	18832575	18838378	L1HS:L1:LINE	-	Intronic	chr16	18839352	18839490	SMG1	-	Non-DE	SRR6368604	Deneault et al. - Neuron	ANOS1
chr18	53382715	53388760	L1PA2:L1:LINE	-	Intronic	chr18	53443957	53447261	LINC01415	-	Non-DE	SRR6368604	Deneault et al. - Neuron	ANOS1
chr2	118681259	118686848	L1PA4:L1:LINE	+	Intronic	chr2	118688612	118688726	CCDC93	-	Non-DE	SRR6368604	Deneault et al. - Neuron	ANOS1
chr3	27857474	27863474	L1PA7:L1:LINE	-	Intronic	chr3	27872378	27875073	LINC01981	-	Non-DE	SRR6368603	Deneault et al. - Neuron	ANOS1
chr3	43607314	43613339	L1PA2:L1:LINE	+	Exonic	chr3	43607144	43607219	ANO10	-	Non-DE	SRR6368603	Deneault et al. - Neuron	ANOS1
chr3	51681874	51687951	L1PA6:L1:LINE	+	Intronic	chr3	51680300	51680497	RAD54L2	+	Non-DE	SRR6368603	Deneault et al. - Neuron	ANOS1
chr3	58827880	58833905	L1PA2:L1:LINE	+	Intronic	chr3	58817411	58817615	CFAP20DC	-	Non-DE	SRR6368604	Deneault et al. - Neuron	ANOS1
chr3	58827880	58833905	L1PA2:L1:LINE	+	Intronic	chr3	58817411	58817615	CFAP20DC	-	Non-DE	SRR6368603	Deneault et al. - Neuron	ANOS1
chr3	154951845	154958485	L1PA15:L1:LINE	-	Intergenic	chr3	154958733	154959414	LINC01487	+	Non-DE	SRR6368604	Deneault et al. - Neuron	ANOS1
chr3	154951845	154958485	L1PA15:L1:LINE	-	Intergenic	chr3	154958733	154959414	LINC01487	+	Non-DE	SRR6368605	Deneault et al. - Neuron	ANOS1
chr4	20740248	20746401	L1PA5:L1:LINE	+	Intronic	chr4	20736250	20736358	KCNIP4	-	Non-DE	SRR6368581	Deneault et al. - Neuron	ANOS1
chr4	20740248	20746401	L1PA5:L1:LINE	+	Intronic	chr4	20736250	20736358	KCNIP4	-	Non-DE	SRR6368603	Deneault et al. - Neuron	ANOS1
chr4	42043774	42050256	L1PA7:L1:LINE	+	Intronic	chr4	42051393	42051496	SLC30A9	+	Non-DE	SRR6368581	Deneault et al. - Neuron	ANOS1
chr4	62609439	62615587	L1PA3:L1:LINE	+	Intronic	chr4	62598471	62599272	ADGRL3	+	Non-DE	SRR6368603	Deneault et al. - Neuron	ANOS1
chr4	62620336	62626523	L1PA4:L1:LINE	-	Intronic	chr4	62598471	62599272	ADGRL3	+	Non-DE	SRR6368581	Deneault et al. - Neuron	ANOS1
chr4	91596877	91602908	L1HS:L1:LINE	-	Intronic	chr4	91645064	91645142	CCSER1	+	Non-DE	SRR6368604	Deneault et al. - Neuron	ANOS1
chr4	91596877	91602908	L1HS:L1:LINE	-	Intronic	chr4	91645064	91645142	CCSER1	+	Non-DE	SRR6368603	Deneault et al. - Neuron	ANOS1
chr5	74002130	74008268	L1PA3:L1:LINE	+	Intronic	chr5	74001043	74001145	HEXB	+	Up-regulated	SRR6368603	Deneault et al. - Neuron	ANOS1
chr8	43038791	43044885	L1PA5:L1:LINE	-	Intronic	chr8	43037287	43037403	HGSNAT	+	Non-DE	SRR6368581	Deneault et al. - Neuron	ANOS1
chr8	63885234	63891726	L1PA7:L1:LINE	-	Exonic	chr8	63890419	63897460	UG0898H09	+	Non-DE	SRR6368581	Deneault et al. - Neuron	ANOS1
chrX	11725368	11731399	L1HS:L1:LINE	+	Intronic	chrX	11682360	11683821	ARHGAP6	-	Up-regulated	SRR6368603	Deneault et al. - Neuron	ANOS1
chrX	73291824	73297937	L1PA8:L1:LINE	-	Intronic	chrX	73251430	73251675	FTX	-	Non-DE	SRR6368603	Deneault et al. - Neuron	ANOS1
chr1	92853959	92860042	L1PA7:L1:LINE	+	Intronic	chr1	92852567	92853732	RPAP2	+	Up-regulated	SRR6368589	Deneault et al. - Neuron	ASTN2
chr1	143125606	143131754	L1PA2:L1:LINE	-	Intronic	chr1	143119060	143119119	RP11-782C8.1	+	Non-DE	SRR6368593	Deneault et al. - Neuron	ASTN2
chr1	143125606	143131754	L1PA2:L1:LINE	-	Intronic	chr1	143119060	143119119	RP11-782C8.1	+	Non-DE	SRR6368589	Deneault et al. - Neuron	ASTN2
chr1	171519607	171525696	L1PA6:L1:LINE	-	Intronic	chr1	171519224	171519379	PRRC2C	+	Non-DE	SRR6368573	Deneault et al. - Neuron	ASTN2
chr1	220814954	220821404	L1PA10:L1:LINE	+	Intronic	chr1	220823961	220824062	MARK1	+	Non-DE	SRR6368589	Deneault et al. - Neuron	ASTN2
chr10	55253766	55259783	L1PA3:L1:LINE	-	Intergenic	chr10	55580859	55583118	PCDH15	-	Non-DE	SRR6368573	Deneault et al. - Neuron	ASTN2
chr10	96865055	96871181	L1PA6:L1:LINE	-	Intronic	chr10	96828991	96829254	CYP2C8	-	Non-DE	SRR6368573	Deneault et al. - Neuron	ASTN2
chr10	101400324	101406444	L1PA5:L1:LINE	-	Intergenic	chr10	101419262	101419345	ENTPD7	+	Non-DE	SRR6368573	Deneault et al. - Neuron	ASTN2
chr11	2655404	2661585	L1PA5:L1:LINE	-	Exonic	chr11	2629557	2721228	KCNQ1OT1	-	Non-DE	SRR6368589	Deneault et al. - Neuron	ASTN2
chr11	7679379	7685402	L1PA2:L1:LINE	-	Intergenic	chr11	7686325	7686777	CYB5R2	-	Up-regulated	SRR6368589	Deneault et al. - Neuron	ASTN2
chr11	14616306	14622422	L1PA6:L1:LINE	-	Intronic	chr11	14665268	14666599	PDE3B	+	Up-regulated	SRR6368573	Deneault et al. - Neuron	ASTN2
chr11	14616306	14622422	L1PA6:L1:LINE	-	Intronic	chr11	14665268	14666599	PDE3B	+	Non-DE	SRR6368589	Deneault et al. - Neuron	ASTN2
chr11	58638766	58644895	L1PA4:L1:LINE	-	Intronic	chr11	58652423	58652497	AB231721	+	Non-DE	SRR6368589	Deneault et al. - Neuron	ASTN2
chr11	58638766	58644895	L1PA4:L1:LINE	-	Intronic	chr11	58652423	58652497	AB231721	+	Non-DE	SRR6368573	Deneault et al. - Neuron	ASTN2
chr12	4618061	4624067	L1PA2:L1:LINE	+	Intronic	chr12	4626226	4626355	C12orf4	-	Non-DE	SRR6368593	Deneault et al. - Neuron	ASTN2
chr12	4618061	4624067	L1PA2:L1:LINE	+	Intronic	chr12	4626226	4626355	C12orf4	-	Non-DE	SRR6368589	Deneault et al. - Neuron	ASTN2
chr12	5225592	5231594	L1PA2:L1:LINE	-	Intergenic	chr12	5153084	5155954	KCNA5	+	Non-DE	SRR6368593	Deneault et al. - Neuron	ASTN2
chr12	79433401	79439425	L1PA2:L1:LINE	-	Exonic	chr12	79439432	79439606	SYT1	+	Non-DE	SRR6368589	Deneault et al. - Neuron	ASTN2
chr12	79433401	79439425	L1PA2:L1:LINE	-	Exonic	chr12	79439432	79439606	SYT1	+	Non-DE	SRR6368593	Deneault et al. - Neuron	ASTN2
chr13	41438707	41444734	L1PA3:L1:LINE	-	Intronic	chr13	41486024	41486859	SUGT1P3	-	Non-DE	SRR6368589	Deneault et al. - Neuron	ASTN2
chr14	55414793	55420840	L1PA5:L1:LINE	+	Intronic	chr14	55422278	55422412	WDHD1	-	Up-regulated	SRR6368593	Deneault et al. - Neuron	ASTN2
chr15	28399917	28406027	L1PA5:L1:LINE	-	Intronic	chr15	28397822	28397976	HERC2	-	Up-regulated	SRR6368573	Deneault et al. - Neuron	ASTN2
chr15	63909208	63914241	L1PA4:L1:LINE	-	Intronic	chr15	63908628	63908881	HERC1	-	Non-DE	SRR6368573	Deneault et al. - Neuron	ASTN2
chr15	82090271	82096304	L1PA2:L1:LINE	+	Intronic	chr15	82334118	82336954	MEX3B	-	Non-DE	SRR6368589	Deneault et al. - Neuron	ASTN2
chr15	82090271	82096304	L1PA2:L1:LINE	+	Intronic	chr15	82334118	82336954	MEX3B	-	Non-DE	SRR6368573	Deneault et al. - Neuron	ASTN2
chr15	82287507	82293537	L1PA2:L1:LINE	+	Intronic	chr15	82334118	82336954	MEX3B	-	Non-DE	SRR6368589	Deneault et al. - Neuron	ASTN2
chr15	82287507	82293537	L1PA2:L1:LINE	+	Intronic	chr15	82334118	82336954	MEX3B	-	Non-DE	SRR6368573	Deneault et al. - Neuron	ASTN2
chr15	97975923	97982079	L1PA3:L1:LINE	+	Intronic	chr15	97896726	97897019	RN7SL677P	+	Non-DE	SRR6368589	Deneault et al. - Neuron	ASTN2
chr15	97975923	97982079	L1PA3:L1:LINE	+	Intronic	chr15	97896726	97897019	RN7SL677P	+	Non-DE	SRR6368593	Deneault et al. - Neuron	ASTN2
chr16	18832575	18838378	L1HS:L1:LINE	-	Intronic	chr16	18839352	18839490	SMG1	-	Up-regulated	SRR6368589	Deneault et al. - Neuron	ASTN2
chr16	18832575	18838378	L1HS:L1:LINE	-	Intronic	chr16	18839352	18839490	SMG1	-	Non-DE	SRR6368573	Deneault et al. - Neuron	ASTN2
chr16	50377250	50383321	L1PA5:L1:LINE	+	Intronic	chr16	50383933	50384078	BRD7	-	Non-DE	SRR6368593	Deneault et al. - Neuron	ASTN2
chr18	53382715	53388760	L1PA2:L1:LINE	-	Intronic	chr18	53443957	53447261	LINC01415	-	Non-DE	SRR6368593	Deneault et al. - Neuron	ASTN2
chr18	53382715	53388760	L1PA2:L1:LINE	-	Intronic	chr18	53443957	53447261	LINC01415	-	Non-DE	SRR6368589	Deneault et al. - Neuron	ASTN2
chr18	75289711	75295821	L1PA6:L1:LINE	+	Intergenic	chr18	74980540	74982096	GALR1	+	Non-DE	SRR6368573	Deneault et al. - Neuron	ASTN2
chr18	75289711	75295821	L1PA6:L1:LINE	+	Intergenic	chr18	74980540	74982096	GALR1	+	Non-DE	SRR6368589	Deneault et al. - Neuron	ASTN2
chr19	12017069	12022645	L1PA5:L1:LINE	+	Intronic	chr19	12015463	12015702	ZNF69	+	Up-regulated	SRR6368589	Deneault et al. - Neuron	ASTN2
chr19	20990530	20996633	L1PA3:L1:LINE	+	Intronic	chr19	20976588	20977403	ZNF66	+	Up-regulated	SRR6368589	Deneault et al. - Neuron	ASTN2
chr19	40543822	40549961	L1PA4:L1:LINE	-	Intronic	chr19	40534166	40542533	ZNF780B	-	Up-regulated	SRR6368589	Deneault et al. - Neuron	ASTN2
chr2	71638604	71644631	L1HS:L1:LINE	-	Intronic	chr2	71645731	71645769	ZNF638	+	Non-DE	SRR6368593	Deneault et al. - Neuron	ASTN2
chr2	118681259	118686848	L1PA4:L1:LINE	+	Intronic	chr2	118688612	118688726	CCDC93	-	Non-DE	SRR6368593	Deneault et al. - Neuron	ASTN2
chr22	22631182	22637196	L1PA3:L1:LINE	-	Intergenic	chr22	22652522	22652576	CH17-264L24.2	+	Non-DE	SRR6368589	Deneault et al. - Neuron	ASTN2
chr3	27857474	27863474	L1PA7:L1:LINE	-	Intronic	chr3	27872378	27875073	LINC01981	-	Non-DE	SRR6368589	Deneault et al. - Neuron	ASTN2
chr3	51681874	51687951	L1PA6:L1:LINE	+	Intronic	chr3	51680300	51680497	RAD54L2	+	Non-DE	SRR6368573	Deneault et al. - Neuron	ASTN2
chr3	58827880	58833905	L1PA2:L1:LINE	+	Intronic	chr3	58817411	58817615	CFAP20DC	-	Non-DE	SRR6368589	Deneault et al. - Neuron	ASTN2
chr3	154951845	154958485	L1PA15:L1:LINE	-	Intergenic	chr3	154958733	154959414	LINC01487	+	Non-DE	SRR6368589	Deneault et al. - Neuron	ASTN2
chr4	20740248	20746401	L1PA5:L1:LINE	+	Intronic	chr4	20736250	20736358	KCNIP4	-	Non-DE	SRR6368573	Deneault et al. - Neuron	ASTN2
chr4	20740248	20746401	L1PA5:L1:LINE	+	Intronic	chr4	20736250	20736358	KCNIP4	-	Non-DE	SRR6368589	Deneault et al. - Neuron	ASTN2
chr4	42043774	42050256	L1PA7:L1:LINE	+	Intronic	chr4	42051393	42051496	SLC30A9	+	Non-DE	SRR6368573	Deneault et al. - Neuron	ASTN2
chr4	62609439	62615587	L1PA3:L1:LINE	+	Intronic	chr4	62598471	62599272	ADGRL3	+	Non-DE	SRR6368573	Deneault et al. - Neuron	ASTN2
chr4	62620336	62626523	L1PA4:L1:LINE	-	Intronic	chr4	62598471	62599272	ADGRL3	+	Non-DE	SRR6368589	Deneault et al. - Neuron	ASTN2
chr4	62620336	62626523	L1PA4:L1:LINE	-	Intronic	chr4	62598471	62599272	ADGRL3	+	Non-DE	SRR6368573	Deneault et al. - Neuron	ASTN2
chr4	69285971	69292051	L1PA6:L1:LINE	+	Intergenic	chr4	69313166	69313241	TMPRSS11E	+	Non-DE	SRR6368573	Deneault et al. - Neuron	ASTN2
chr4	71919553	71925574	L1PA3:L1:LINE	-	Intergenic	chr4	71895068	71896629	DCK	+	Non-DE	SRR6368589	Deneault et al. - Neuron	ASTN2
chr4	71919553	71925574	L1PA3:L1:LINE	-	Intergenic	chr4	71895068	71896629	DCK	+	Non-DE	SRR6368573	Deneault et al. - Neuron	ASTN2
chr4	91596877	91602908	L1HS:L1:LINE	-	Intronic	chr4	91645064	91645142	CCSER1	+	Non-DE	SRR6368589	Deneault et al. - Neuron	ASTN2
chr4	104171422	104177447	L1PA2:L1:LINE	-	Intronic	chr4	104119420	104119566	CENPE	-	Non-DE	SRR6368589	Deneault et al. - Neuron	ASTN2
chr4	128638142	128644524	L1PA10:L1:LINE	-	Intronic	chr4	128637479	128637934	INTU	+	Up-regulated	SRR6368593	Deneault et al. - Neuron	ASTN2
chr4	167664640	167670800	L1PA5:L1:LINE	+	Intronic	chr4	167663147	167663210	SPOCK3	-	Non-DE	SRR6368573	Deneault et al. - Neuron	ASTN2
chr5	74002130	74008268	L1PA3:L1:LINE	+	Intronic	chr5	74001043	74001145	HEXB	+	Non-DE	SRR6368589	Deneault et al. - Neuron	ASTN2
chr5	74002130	74008268	L1PA3:L1:LINE	+	Intronic	chr5	74001043	74001145	HEXB	+	Non-DE	SRR6368593	Deneault et al. - Neuron	ASTN2
chr5	139831619	139837446	L1PA5:L1:LINE	+	Intronic	chr5	139838209	139838447	ANKHD1-EIF4EBP3	+	Non-DE	SRR6368589	Deneault et al. - Neuron	ASTN2
chr5	139831619	139837446	L1PA5:L1:LINE	+	Intronic	chr5	139838209	139838447	ANKHD1-EIF4EBP3	+	Non-DE	SRR6368593	Deneault et al. - Neuron	ASTN2
chr6	76609458	76615462	L1PA3:L1:LINE	-	Intronic	chr6	76608089	76608128	MYO6	+	Non-DE	SRR6368589	Deneault et al. - Neuron	ASTN2
chr6	76609458	76615462	L1PA3:L1:LINE	-	Intronic	chr6	76608089	76608128	MYO6	+	Non-DE	SRR6368593	Deneault et al. - Neuron	ASTN2
chr6	80287373	80293483	L1PA6:L1:LINE	+	Intergenic	chr6	80248450	80248479	DQ582269	+	Non-DE	SRR6368589	Deneault et al. - Neuron	ASTN2
chr6	144172713	144178208	L1PA7:L1:LINE	-	Exonic	chr6	144175205	144177090	AX746989	+	Non-DE	SRR6368593	Deneault et al. - Neuron	ASTN2
chr7	91813070	91819192	L1PA3:L1:LINE	-	Intronic	chr7	91808164	91809228	CYP51A1-AS1	+	Non-DE	SRR6368589	Deneault et al. - Neuron	ASTN2
chr8	103329168	103335319	L1PA3:L1:LINE	+	Intronic	chr8	103335538	103335723	UBR5	-	Up-regulated	SRR6368589	Deneault et al. - Neuron	ASTN2
chr9	42690271	42696344	L1PA3:L1:LINE	-	Intronic	chr9	42689821	42689878	CBWD7	+	Non-DE	SRR6368573	Deneault et al. - Neuron	ASTN2
chr9	70199709	70205784	L1PA3:L1:LINE	+	Intronic	chr9	70195030	70195743	CBWD5	-	Non-DE	SRR6368573	Deneault et al. - Neuron	ASTN2
chr9	70450620	70456693	L1PA3:L1:LINE	+	Intronic	chr9	70457086	70457143	CBWD5	-	Non-DE	SRR6368573	Deneault et al. - Neuron	ASTN2
chrUn_gl000214	39518	45655	L1PA3:L1:LINE	-	Intergenic	chrUn_gl000214	32576	32635	BC012753	+	Non-DE	SRR6368593	Deneault et al. - Neuron	ASTN2
chrUn_gl000214	39518	45655	L1PA3:L1:LINE	-	Intergenic	chrUn_gl000214	32576	32635	BC012753	+	Non-DE	SRR6368589	Deneault et al. - Neuron	ASTN2
chrX	11725368	11731399	L1HS:L1:LINE	+	Intronic	chrX	11682360	11683821	ARHGAP6	-	Up-regulated	SRR6368589	Deneault et al. - Neuron	ASTN2
chrX	11725368	11731399	L1HS:L1:LINE	+	Intronic	chrX	11682360	11683821	ARHGAP6	-	Down-regulated	SRR6368573	Deneault et al. - Neuron	ASTN2
chrX	73253778	73259910	L1PA5:L1:LINE	-	Intronic	chrX	73251430	73251675	FTX	-	Non-DE	SRR6368573	Deneault et al. - Neuron	ASTN2
chrX	73291824	73297937	L1PA8:L1:LINE	-	Intronic	chrX	73251430	73251675	FTX	-	Non-DE	SRR6368589	Deneault et al. - Neuron	ASTN2
chrX	128374838	128380974	L1PA4:L1:LINE	+	Intronic	chrX	128580477	128581278	SMARCA1	-	Non-DE	SRR6368573	Deneault et al. - Neuron	ASTN2
chr1	43580198	43586187	L1PA2:L1:LINE	-	Exonic	chr1	43585818	43585943	FAM183A	+	Non-DE	SRR6368575	Deneault et al. - Neuron	ATRX
chr1	43580198	43586187	L1PA2:L1:LINE	-	Exonic	chr1	43585818	43585943	FAM183A	+	Non-DE	SRR6368583	Deneault et al. - Neuron	ATRX
chr1	43580198	43586187	L1PA2:L1:LINE	-	Exonic	chr1	43585818	43585943	FAM183A	+	Non-DE	SRR6368595	Deneault et al. - Neuron	ATRX
chr1	43580198	43586187	L1PA2:L1:LINE	-	Exonic	chr1	43585818	43585943	FAM183A	+	Non-DE	SRR6368594	Deneault et al. - Neuron	ATRX
chr1	92853959	92860042	L1PA7:L1:LINE	+	Intronic	chr1	92852567	92853732	RPAP2	+	Up-regulated	SRR6368595	Deneault et al. - Neuron	ATRX
chr1	92853959	92860042	L1PA7:L1:LINE	+	Intronic	chr1	92852567	92853732	RPAP2	+	Up-regulated	SRR6368583	Deneault et al. - Neuron	ATRX
chr1	119563254	119569271	L1PA3:L1:LINE	+	Intergenic	chr1	119573838	119575982	WARS2	-	Non-DE	SRR6368575	Deneault et al. - Neuron	ATRX
chr1	121316087	121322219	L1PA3:L1:LINE	+	Intronic	chr1	121310573	121313686	EMBP1	+	Non-DE	SRR6368583	Deneault et al. - Neuron	ATRX
chr1	121316087	121322219	L1PA3:L1:LINE	+	Intronic	chr1	121310573	121313686	EMBP1	+	Non-DE	SRR6368575	Deneault et al. - Neuron	ATRX
chr1	143125606	143131754	L1PA2:L1:LINE	-	Intronic	chr1	143119060	143119119	RP11-782C8.1	+	Non-DE	SRR6368594	Deneault et al. - Neuron	ATRX
chr1	143125606	143131754	L1PA2:L1:LINE	-	Intronic	chr1	143119060	143119119	RP11-782C8.1	+	Non-DE	SRR6368595	Deneault et al. - Neuron	ATRX
chr1	143125606	143131754	L1PA2:L1:LINE	-	Intronic	chr1	143119060	143119119	RP11-782C8.1	+	Non-DE	SRR6368583	Deneault et al. - Neuron	ATRX
chr1	149923964	149930070	L1PA5:L1:LINE	-	Intronic	chr1	149931602	149931715	OTUD7B	-	Non-DE	SRR6368575	Deneault et al. - Neuron	ATRX
chr1	220814954	220821404	L1PA10:L1:LINE	+	Intronic	chr1	220823961	220824062	MARK1	+	Non-DE	SRR6368595	Deneault et al. - Neuron	ATRX
chr1	220814954	220821404	L1PA10:L1:LINE	+	Intronic	chr1	220823961	220824062	MARK1	+	Up-regulated	SRR6368583	Deneault et al. - Neuron	ATRX
chr10	33201104	33207283	L1PA5:L1:LINE	+	Exonic	chr10	33200813	33201052	ITGB1	-	Up-regulated	SRR6368575	Deneault et al. - Neuron	ATRX
chr10	55253766	55259783	L1PA3:L1:LINE	-	Intergenic	chr10	55580859	55583118	PCDH15	-	Non-DE	SRR6368575	Deneault et al. - Neuron	ATRX
chr10	55253766	55259783	L1PA3:L1:LINE	-	Intergenic	chr10	55580859	55583118	PCDH15	-	Non-DE	SRR6368594	Deneault et al. - Neuron	ATRX
chr10	55253766	55259783	L1PA3:L1:LINE	-	Intergenic	chr10	55580859	55583118	PCDH15	-	Non-DE	SRR6368595	Deneault et al. - Neuron	ATRX
chr10	86039723	86045762	L1PA2:L1:LINE	+	Exonic	chr10	86039735	86039821	LINC00858	+	Non-DE	SRR6368595	Deneault et al. - Neuron	ATRX
chr10	86039723	86045762	L1PA2:L1:LINE	+	Exonic	chr10	86039735	86039821	LINC00858	+	Non-DE	SRR6368594	Deneault et al. - Neuron	ATRX
chr10	86039723	86045762	L1PA2:L1:LINE	+	Exonic	chr10	86039735	86039821	LINC00858	+	Non-DE	SRR6368575	Deneault et al. - Neuron	ATRX
chr10	96865055	96871181	L1PA6:L1:LINE	-	Intronic	chr10	96828991	96829254	CYP2C8	-	Non-DE	SRR6368575	Deneault et al. - Neuron	ATRX
chr10	96865055	96871181	L1PA6:L1:LINE	-	Intronic	chr10	96828991	96829254	CYP2C8	-	Non-DE	SRR6368583	Deneault et al. - Neuron	ATRX
chr10	101400324	101406444	L1PA5:L1:LINE	-	Intergenic	chr10	101419262	101419345	ENTPD7	+	Non-DE	SRR6368575	Deneault et al. - Neuron	ATRX
chr11	2655404	2661585	L1PA5:L1:LINE	-	Exonic	chr11	2629557	2721228	KCNQ1OT1	-	Non-DE	SRR6368583	Deneault et al. - Neuron	ATRX
chr11	2655404	2661585	L1PA5:L1:LINE	-	Exonic	chr11	2629557	2721228	KCNQ1OT1	-	Non-DE	SRR6368575	Deneault et al. - Neuron	ATRX
chr11	7679379	7685402	L1PA2:L1:LINE	-	Intergenic	chr11	7686325	7686777	CYB5R2	-	Up-regulated	SRR6368583	Deneault et al. - Neuron	ATRX
chr11	7679379	7685402	L1PA2:L1:LINE	-	Intergenic	chr11	7686325	7686777	CYB5R2	-	Up-regulated	SRR6368595	Deneault et al. - Neuron	ATRX
chr11	7679379	7685402	L1PA2:L1:LINE	-	Intergenic	chr11	7686325	7686777	CYB5R2	-	Up-regulated	SRR6368594	Deneault et al. - Neuron	ATRX
chr11	7679379	7685402	L1PA2:L1:LINE	-	Intergenic	chr11	7686325	7686777	CYB5R2	-	Up-regulated	SRR6368575	Deneault et al. - Neuron	ATRX
chr11	14616306	14622422	L1PA6:L1:LINE	-	Intronic	chr11	14665268	14666599	PDE3B	+	Up-regulated	SRR6368583	Deneault et al. - Neuron	ATRX
chr11	14616306	14622422	L1PA6:L1:LINE	-	Intronic	chr11	14665268	14666599	PDE3B	+	Non-DE	SRR6368575	Deneault et al. - Neuron	ATRX
chr11	43367651	43373668	L1PA2:L1:LINE	-	Intronic	chr11	43363977	43366080	API5	+	Non-DE	SRR6368575	Deneault et al. - Neuron	ATRX
chr11	43367651	43373668	L1PA2:L1:LINE	-	Intronic	chr11	43363977	43366080	API5	+	Non-DE	SRR6368583	Deneault et al. - Neuron	ATRX
chr11	43367651	43373668	L1PA2:L1:LINE	-	Intronic	chr11	43363977	43366080	API5	+	Non-DE	SRR6368595	Deneault et al. - Neuron	ATRX
chr11	43367651	43373668	L1PA2:L1:LINE	-	Intronic	chr11	43363977	43366080	API5	+	Non-DE	SRR6368594	Deneault et al. - Neuron	ATRX
chr11	95169380	95175410	L1HS:L1:LINE	+	Intergenic	chr11	95257193	95257298	5S_rRNA	-	Non-DE	SRR6368595	Deneault et al. - Neuron	ATRX
chr11	95169380	95175410	L1HS:L1:LINE	+	Intergenic	chr11	95257193	95257298	5S_rRNA	-	Non-DE	SRR6368575	Deneault et al. - Neuron	ATRX
chr11	95169380	95175410	L1HS:L1:LINE	+	Intergenic	chr11	95257193	95257298	5S_rRNA	-	Non-DE	SRR6368583	Deneault et al. - Neuron	ATRX
chr11	95169380	95175410	L1HS:L1:LINE	+	Intergenic	chr11	95257193	95257298	5S_rRNA	-	Non-DE	SRR6368594	Deneault et al. - Neuron	ATRX
chr11	96138784	96144829	L1PA2:L1:LINE	-	Intronic	chr11	96123646	96126727	JRKL	+	Non-DE	SRR6368575	Deneault et al. - Neuron	ATRX
chr11	96138784	96144829	L1PA2:L1:LINE	-	Intronic	chr11	96123646	96126727	JRKL	+	Up-regulated	SRR6368594	Deneault et al. - Neuron	ATRX
chr11	96138784	96144829	L1PA2:L1:LINE	-	Intronic	chr11	96123646	96126727	JRKL	+	Up-regulated	SRR6368595	Deneault et al. - Neuron	ATRX
chr11	113094669	113100816	L1PA5:L1:LINE	+	Intronic	chr11	113101917	113101995	NCAM1	+	Non-DE	SRR6368595	Deneault et al. - Neuron	ATRX
chr11	113094669	113100816	L1PA5:L1:LINE	+	Intronic	chr11	113101917	113101995	NCAM1	+	Non-DE	SRR6368575	Deneault et al. - Neuron	ATRX
chr11	113094669	113100816	L1PA5:L1:LINE	+	Intronic	chr11	113101917	113101995	NCAM1	+	Non-DE	SRR6368583	Deneault et al. - Neuron	ATRX
chr12	4618061	4624067	L1PA2:L1:LINE	+	Intronic	chr12	4626226	4626355	C12orf4	-	Non-DE	SRR6368594	Deneault et al. - Neuron	ATRX
chr12	4618061	4624067	L1PA2:L1:LINE	+	Intronic	chr12	4626226	4626355	C12orf4	-	Non-DE	SRR6368575	Deneault et al. - Neuron	ATRX
chr12	4618061	4624067	L1PA2:L1:LINE	+	Intronic	chr12	4626226	4626355	C12orf4	-	Non-DE	SRR6368595	Deneault et al. - Neuron	ATRX
chr12	4618061	4624067	L1PA2:L1:LINE	+	Intronic	chr12	4626226	4626355	C12orf4	-	Non-DE	SRR6368583	Deneault et al. - Neuron	ATRX
chr12	5225592	5231594	L1PA2:L1:LINE	-	Intergenic	chr12	5153084	5155954	KCNA5	+	Non-DE	SRR6368583	Deneault et al. - Neuron	ATRX
chr12	5225592	5231594	L1PA2:L1:LINE	-	Intergenic	chr12	5153084	5155954	KCNA5	+	Non-DE	SRR6368594	Deneault et al. - Neuron	ATRX
chr12	5225592	5231594	L1PA2:L1:LINE	-	Intergenic	chr12	5153084	5155954	KCNA5	+	Non-DE	SRR6368595	Deneault et al. - Neuron	ATRX
chr12	5225592	5231594	L1PA2:L1:LINE	-	Intergenic	chr12	5153084	5155954	KCNA5	+	Non-DE	SRR6368575	Deneault et al. - Neuron	ATRX
chr12	29475994	29481840	L1PA4:L1:LINE	+	Intronic	chr12	29474727	29474857	FAR2	+	Up-regulated	SRR6368583	Deneault et al. - Neuron	ATRX
chr12	29475994	29481840	L1PA4:L1:LINE	+	Intronic	chr12	29474727	29474857	FAR2	+	Up-regulated	SRR6368575	Deneault et al. - Neuron	ATRX
chr12	79433401	79439425	L1PA2:L1:LINE	-	Exonic	chr12	79439432	79439606	SYT1	+	Non-DE	SRR6368583	Deneault et al. - Neuron	ATRX
chr12	79433401	79439425	L1PA2:L1:LINE	-	Exonic	chr12	79439432	79439606	SYT1	+	Non-DE	SRR6368594	Deneault et al. - Neuron	ATRX
chr12	79433401	79439425	L1PA2:L1:LINE	-	Exonic	chr12	79439432	79439606	SYT1	+	Non-DE	SRR6368575	Deneault et al. - Neuron	ATRX
chr12	79433401	79439425	L1PA2:L1:LINE	-	Exonic	chr12	79439432	79439606	SYT1	+	Non-DE	SRR6368595	Deneault et al. - Neuron	ATRX
chr12	96709720	96715749	L1PA2:L1:LINE	+	Intronic	chr12	96717725	96717890	CDK17	-	Up-regulated	SRR6368595	Deneault et al. - Neuron	ATRX
chr12	96709720	96715749	L1PA2:L1:LINE	+	Intronic	chr12	96717725	96717890	CDK17	-	Non-DE	SRR6368594	Deneault et al. - Neuron	ATRX
chr13	41438707	41444734	L1PA3:L1:LINE	-	Intronic	chr13	41486024	41486859	SUGT1P3	-	Non-DE	SRR6368575	Deneault et al. - Neuron	ATRX
chr13	41438707	41444734	L1PA3:L1:LINE	-	Intronic	chr13	41486024	41486859	SUGT1P3	-	Non-DE	SRR6368583	Deneault et al. - Neuron	ATRX
chr13	53289490	53295879	L1PA7:L1:LINE	-	Intronic	chr13	53298131	53298245	CNMD	-	Non-DE	SRR6368583	Deneault et al. - Neuron	ATRX
chr14	88922077	88928190	L1PA4:L1:LINE	-	Intronic	chr14	88932121	88934609	PTPN21	-	Non-DE	SRR6368583	Deneault et al. - Neuron	ATRX
chr15	28399917	28406027	L1PA5:L1:LINE	-	Intronic	chr15	28397822	28397976	HERC2	-	Up-regulated	SRR6368575	Deneault et al. - Neuron	ATRX
chr15	56426816	56432826	L1PA2:L1:LINE	-	Intronic	chr15	56434975	56435098	RFX7	-	Non-DE	SRR6368575	Deneault et al. - Neuron	ATRX
chr15	63909208	63914241	L1PA4:L1:LINE	-	Intronic	chr15	63908628	63908881	HERC1	-	Up-regulated	SRR6368583	Deneault et al. - Neuron	ATRX
chr15	63909208	63914241	L1PA4:L1:LINE	-	Intronic	chr15	63908628	63908881	HERC1	-	Non-DE	SRR6368575	Deneault et al. - Neuron	ATRX
chr15	81960854	81966845	L1PA2:L1:LINE	-	Intronic	chr15	81666329	81666418	TMC3	-	Non-DE	SRR6368575	Deneault et al. - Neuron	ATRX
chr15	81960854	81966845	L1PA2:L1:LINE	-	Intronic	chr15	81666329	81666418	TMC3	-	Non-DE	SRR6368594	Deneault et al. - Neuron	ATRX
chr15	81960854	81966845	L1PA2:L1:LINE	-	Intronic	chr15	81666329	81666418	TMC3	-	Non-DE	SRR6368595	Deneault et al. - Neuron	ATRX
chr15	81960854	81966845	L1PA2:L1:LINE	-	Intronic	chr15	81666329	81666418	TMC3	-	Non-DE	SRR6368583	Deneault et al. - Neuron	ATRX
chr15	82090271	82096304	L1PA2:L1:LINE	+	Intronic	chr15	82334118	82336954	MEX3B	-	Non-DE	SRR6368583	Deneault et al. - Neuron	ATRX
chr15	82090271	82096304	L1PA2:L1:LINE	+	Intronic	chr15	82334118	82336954	MEX3B	-	Non-DE	SRR6368595	Deneault et al. - Neuron	ATRX
chr15	82090271	82096304	L1PA2:L1:LINE	+	Intronic	chr15	82334118	82336954	MEX3B	-	Non-DE	SRR6368594	Deneault et al. - Neuron	ATRX
chr15	82090271	82096304	L1PA2:L1:LINE	+	Intronic	chr15	82334118	82336954	MEX3B	-	Non-DE	SRR6368575	Deneault et al. - Neuron	ATRX
chr15	82163008	82169040	L1PA2:L1:LINE	+	Intronic	chr15	82334118	82336954	MEX3B	-	Non-DE	SRR6368595	Deneault et al. - Neuron	ATRX
chr15	82163008	82169040	L1PA2:L1:LINE	+	Intronic	chr15	82334118	82336954	MEX3B	-	Non-DE	SRR6368583	Deneault et al. - Neuron	ATRX
chr15	82163008	82169040	L1PA2:L1:LINE	+	Intronic	chr15	82334118	82336954	MEX3B	-	Non-DE	SRR6368594	Deneault et al. - Neuron	ATRX
chr15	82163008	82169040	L1PA2:L1:LINE	+	Intronic	chr15	82334118	82336954	MEX3B	-	Non-DE	SRR6368575	Deneault et al. - Neuron	ATRX
chr15	82287507	82293537	L1PA2:L1:LINE	+	Intronic	chr15	82334118	82336954	MEX3B	-	Non-DE	SRR6368595	Deneault et al. - Neuron	ATRX
chr15	82287507	82293537	L1PA2:L1:LINE	+	Intronic	chr15	82334118	82336954	MEX3B	-	Non-DE	SRR6368594	Deneault et al. - Neuron	ATRX
chr15	82287507	82293537	L1PA2:L1:LINE	+	Intronic	chr15	82334118	82336954	MEX3B	-	Non-DE	SRR6368575	Deneault et al. - Neuron	ATRX
chr15	82287507	82293537	L1PA2:L1:LINE	+	Intronic	chr15	82334118	82336954	MEX3B	-	Non-DE	SRR6368583	Deneault et al. - Neuron	ATRX
chr15	97975923	97982079	L1PA3:L1:LINE	+	Intronic	chr15	97896726	97897019	RN7SL677P	+	Non-DE	SRR6368595	Deneault et al. - Neuron	ATRX
chr15	97975923	97982079	L1PA3:L1:LINE	+	Intronic	chr15	97896726	97897019	RN7SL677P	+	Non-DE	SRR6368575	Deneault et al. - Neuron	ATRX
chr15	97975923	97982079	L1PA3:L1:LINE	+	Intronic	chr15	97896726	97897019	RN7SL677P	+	Non-DE	SRR6368583	Deneault et al. - Neuron	ATRX
chr15	97975923	97982079	L1PA3:L1:LINE	+	Intronic	chr15	97896726	97897019	RN7SL677P	+	Non-DE	SRR6368594	Deneault et al. - Neuron	ATRX
chr16	18832575	18838378	L1HS:L1:LINE	-	Intronic	chr16	18839352	18839490	SMG1	-	Up-regulated	SRR6368595	Deneault et al. - Neuron	ATRX
chr16	18832575	18838378	L1HS:L1:LINE	-	Intronic	chr16	18839352	18839490	SMG1	-	Up-regulated	SRR6368583	Deneault et al. - Neuron	ATRX
chr16	18832575	18838378	L1HS:L1:LINE	-	Intronic	chr16	18839352	18839490	SMG1	-	Non-DE	SRR6368594	Deneault et al. - Neuron	ATRX
chr16	18832575	18838378	L1HS:L1:LINE	-	Intronic	chr16	18839352	18839490	SMG1	-	Non-DE	SRR6368575	Deneault et al. - Neuron	ATRX
chr16	82172856	82178863	L1PA2:L1:LINE	+	Intronic	chr16	82181766	82182468	MPHOSPH6	-	Non-DE	SRR6368583	Deneault et al. - Neuron	ATRX
chr16	82172856	82178863	L1PA2:L1:LINE	+	Intronic	chr16	82181766	82182468	MPHOSPH6	-	Non-DE	SRR6368595	Deneault et al. - Neuron	ATRX
chr16	82172856	82178863	L1PA2:L1:LINE	+	Intronic	chr16	82181766	82182468	MPHOSPH6	-	Non-DE	SRR6368575	Deneault et al. - Neuron	ATRX
chr17	58958801	58964835	L1PA2:L1:LINE	-	Intronic	chr17	58967055	58967132	BCAS3	+	Non-DE	SRR6368594	Deneault et al. - Neuron	ATRX
chr17	58958801	58964835	L1PA2:L1:LINE	-	Intronic	chr17	58967055	58967132	BCAS3	+	Non-DE	SRR6368575	Deneault et al. - Neuron	ATRX
chr17	58958801	58964835	L1PA2:L1:LINE	-	Intronic	chr17	58967055	58967132	BCAS3	+	Non-DE	SRR6368583	Deneault et al. - Neuron	ATRX
chr17	58958801	58964835	L1PA2:L1:LINE	-	Intronic	chr17	58967055	58967132	BCAS3	+	Non-DE	SRR6368595	Deneault et al. - Neuron	ATRX
chr18	53382715	53388760	L1PA2:L1:LINE	-	Intronic	chr18	53443957	53447261	LINC01415	-	Non-DE	SRR6368575	Deneault et al. - Neuron	ATRX
chr18	53382715	53388760	L1PA2:L1:LINE	-	Intronic	chr18	53443957	53447261	LINC01415	-	Non-DE	SRR6368583	Deneault et al. - Neuron	ATRX
chr18	53382715	53388760	L1PA2:L1:LINE	-	Intronic	chr18	53443957	53447261	LINC01415	-	Non-DE	SRR6368594	Deneault et al. - Neuron	ATRX
chr18	53382715	53388760	L1PA2:L1:LINE	-	Intronic	chr18	53443957	53447261	LINC01415	-	Non-DE	SRR6368595	Deneault et al. - Neuron	ATRX
chr18	75127932	75133958	L1PA3:L1:LINE	-	Intronic	chr18	74980540	74982096	GALR1	+	Non-DE	SRR6368595	Deneault et al. - Neuron	ATRX
chr18	75127932	75133958	L1PA3:L1:LINE	-	Intronic	chr18	74980540	74982096	GALR1	+	Non-DE	SRR6368594	Deneault et al. - Neuron	ATRX
chr18	75127932	75133958	L1PA3:L1:LINE	-	Intronic	chr18	74980540	74982096	GALR1	+	Non-DE	SRR6368575	Deneault et al. - Neuron	ATRX
chr18	75289711	75295821	L1PA6:L1:LINE	+	Intergenic	chr18	74980540	74982096	GALR1	+	Non-DE	SRR6368575	Deneault et al. - Neuron	ATRX
chr18	75289711	75295821	L1PA6:L1:LINE	+	Intergenic	chr18	74980540	74982096	GALR1	+	Non-DE	SRR6368595	Deneault et al. - Neuron	ATRX
chr18	75289711	75295821	L1PA6:L1:LINE	+	Intergenic	chr18	74980540	74982096	GALR1	+	Non-DE	SRR6368583	Deneault et al. - Neuron	ATRX
chr18	75289711	75295821	L1PA6:L1:LINE	+	Intergenic	chr18	74980540	74982096	GALR1	+	Non-DE	SRR6368594	Deneault et al. - Neuron	ATRX
chr19	40543822	40549961	L1PA4:L1:LINE	-	Intronic	chr19	40534166	40542533	ZNF780B	-	Non-DE	SRR6368595	Deneault et al. - Neuron	ATRX
chr19	40543822	40549961	L1PA4:L1:LINE	-	Intronic	chr19	40534166	40542533	ZNF780B	-	Non-DE	SRR6368575	Deneault et al. - Neuron	ATRX
chr19	40543822	40549961	L1PA4:L1:LINE	-	Intronic	chr19	40534166	40542533	ZNF780B	-	Up-regulated	SRR6368583	Deneault et al. - Neuron	ATRX
chr2	118380829	118386852	L1PA3:L1:LINE	+	Intergenic	chr2	118572254	118572438	DDX18	+	Non-DE	SRR6368594	Deneault et al. - Neuron	ATRX
chr2	118380829	118386852	L1PA3:L1:LINE	+	Intergenic	chr2	118572254	118572438	DDX18	+	Non-DE	SRR6368595	Deneault et al. - Neuron	ATRX
chr2	118380829	118386852	L1PA3:L1:LINE	+	Intergenic	chr2	118572254	118572438	DDX18	+	Non-DE	SRR6368575	Deneault et al. - Neuron	ATRX
chr2	118380829	118386852	L1PA3:L1:LINE	+	Intergenic	chr2	118572254	118572438	DDX18	+	Non-DE	SRR6368583	Deneault et al. - Neuron	ATRX
chr2	170105133	170111166	L1HS:L1:LINE	+	Intronic	chr2	170103887	170104025	LRP2	-	Non-DE	SRR6368583	Deneault et al. - Neuron	ATRX
chr2	170105133	170111166	L1HS:L1:LINE	+	Intronic	chr2	170103887	170104025	LRP2	-	Non-DE	SRR6368594	Deneault et al. - Neuron	ATRX
chr2	170105133	170111166	L1HS:L1:LINE	+	Intronic	chr2	170103887	170104025	LRP2	-	Non-DE	SRR6368595	Deneault et al. - Neuron	ATRX
chr2	170105133	170111166	L1HS:L1:LINE	+	Intronic	chr2	170103887	170104025	LRP2	-	Non-DE	SRR6368575	Deneault et al. - Neuron	ATRX
chr20	8575748	8581774	L1PA2:L1:LINE	-	Intronic	chr20	8608940	8609078	PLCB1	+	Up-regulated	SRR6368575	Deneault et al. - Neuron	ATRX
chr20	33659086	33665195	L1PA5:L1:LINE	-	Intronic	chr20	33665848	33665977	TRPC4AP	-	Up-regulated	SRR6368575	Deneault et al. - Neuron	ATRX
chr20	52072101	52078105	L1PA3:L1:LINE	-	Intronic	chr20	52103682	52111869	TSHZ2	+	Up-regulated	SRR6368594	Deneault et al. - Neuron	ATRX
chr20	52072101	52078105	L1PA3:L1:LINE	-	Intronic	chr20	52103682	52111869	TSHZ2	+	Non-DE	SRR6368595	Deneault et al. - Neuron	ATRX
chr20	52120390	52126413	L1PA2:L1:LINE	+	Exonic	chr20	52120647	52120860	RP4-669H2.1	-	Non-DE	SRR6368594	Deneault et al. - Neuron	ATRX
chr20	52120390	52126413	L1PA2:L1:LINE	+	Exonic	chr20	52120647	52120860	RP4-669H2.1	-	Non-DE	SRR6368575	Deneault et al. - Neuron	ATRX
chr20	52120390	52126413	L1PA2:L1:LINE	+	Exonic	chr20	52120647	52120860	RP4-669H2.1	-	Non-DE	SRR6368583	Deneault et al. - Neuron	ATRX
chr20	52120390	52126413	L1PA2:L1:LINE	+	Exonic	chr20	52120647	52120860	RP4-669H2.1	-	Non-DE	SRR6368595	Deneault et al. - Neuron	ATRX
chr21	35297926	35303910	L1PA2:L1:LINE	-	Exonic	chr21	35303515	35304046	LINC00649	+	Non-DE	SRR6368575	Deneault et al. - Neuron	ATRX
chr21	35297926	35303910	L1PA2:L1:LINE	-	Exonic	chr21	35303515	35304046	LINC00649	+	Non-DE	SRR6368594	Deneault et al. - Neuron	ATRX
chr21	35297926	35303910	L1PA2:L1:LINE	-	Exonic	chr21	35303515	35304046	LINC00649	+	Non-DE	SRR6368595	Deneault et al. - Neuron	ATRX
chr22	22631182	22637196	L1PA3:L1:LINE	-	Intergenic	chr22	22652522	22652576	CH17-264L24.2	+	Non-DE	SRR6368583	Deneault et al. - Neuron	ATRX
chr22	22631182	22637196	L1PA3:L1:LINE	-	Intergenic	chr22	22652522	22652576	CH17-264L24.2	+	Non-DE	SRR6368595	Deneault et al. - Neuron	ATRX
chr3	15433014	15439121	L1PA4:L1:LINE	-	Intronic	chr3	15451376	15452944	METTL6	-	Non-DE	SRR6368575	Deneault et al. - Neuron	ATRX
chr3	15433014	15439121	L1PA4:L1:LINE	-	Intronic	chr3	15451376	15452944	METTL6	-	Non-DE	SRR6368583	Deneault et al. - Neuron	ATRX
chr3	27857474	27863474	L1PA7:L1:LINE	-	Intronic	chr3	27872378	27875073	LINC01981	-	Non-DE	SRR6368575	Deneault et al. - Neuron	ATRX
chr3	27857474	27863474	L1PA7:L1:LINE	-	Intronic	chr3	27872378	27875073	LINC01981	-	Non-DE	SRR6368583	Deneault et al. - Neuron	ATRX
chr3	27857474	27863474	L1PA7:L1:LINE	-	Intronic	chr3	27872378	27875073	LINC01981	-	Non-DE	SRR6368594	Deneault et al. - Neuron	ATRX
chr3	27857474	27863474	L1PA7:L1:LINE	-	Intronic	chr3	27872378	27875073	LINC01981	-	Non-DE	SRR6368595	Deneault et al. - Neuron	ATRX
chr3	43607314	43613339	L1PA2:L1:LINE	+	Exonic	chr3	43607144	43607219	ANO10	-	Non-DE	SRR6368583	Deneault et al. - Neuron	ATRX
chr3	43607314	43613339	L1PA2:L1:LINE	+	Exonic	chr3	43607144	43607219	ANO10	-	Non-DE	SRR6368595	Deneault et al. - Neuron	ATRX
chr3	43607314	43613339	L1PA2:L1:LINE	+	Exonic	chr3	43607144	43607219	ANO10	-	Non-DE	SRR6368594	Deneault et al. - Neuron	ATRX
chr3	43607314	43613339	L1PA2:L1:LINE	+	Exonic	chr3	43607144	43607219	ANO10	-	Non-DE	SRR6368575	Deneault et al. - Neuron	ATRX
chr3	58827880	58833905	L1PA2:L1:LINE	+	Intronic	chr3	58817411	58817615	CFAP20DC	-	Non-DE	SRR6368595	Deneault et al. - Neuron	ATRX
chr3	58827880	58833905	L1PA2:L1:LINE	+	Intronic	chr3	58817411	58817615	CFAP20DC	-	Non-DE	SRR6368594	Deneault et al. - Neuron	ATRX
chr3	58827880	58833905	L1PA2:L1:LINE	+	Intronic	chr3	58817411	58817615	CFAP20DC	-	Non-DE	SRR6368575	Deneault et al. - Neuron	ATRX
chr3	58827880	58833905	L1PA2:L1:LINE	+	Intronic	chr3	58817411	58817615	CFAP20DC	-	Non-DE	SRR6368583	Deneault et al. - Neuron	ATRX
chr3	134971056	134977072	L1PA2:L1:LINE	-	Intronic	chr3	134977853	134979307	EPHB1	+	Non-DE	SRR6368575	Deneault et al. - Neuron	ATRX
chr3	134971056	134977072	L1PA2:L1:LINE	-	Intronic	chr3	134977853	134979307	EPHB1	+	Non-DE	SRR6368583	Deneault et al. - Neuron	ATRX
chr3	134971056	134977072	L1PA2:L1:LINE	-	Intronic	chr3	134977853	134979307	EPHB1	+	Non-DE	SRR6368594	Deneault et al. - Neuron	ATRX
chr3	134971056	134977072	L1PA2:L1:LINE	-	Intronic	chr3	134977853	134979307	EPHB1	+	Non-DE	SRR6368595	Deneault et al. - Neuron	ATRX
chr3	154951845	154958485	L1PA15:L1:LINE	-	Intergenic	chr3	154958733	154959414	LINC01487	+	Non-DE	SRR6368594	Deneault et al. - Neuron	ATRX
chr3	154951845	154958485	L1PA15:L1:LINE	-	Intergenic	chr3	154958733	154959414	LINC01487	+	Non-DE	SRR6368575	Deneault et al. - Neuron	ATRX
chr3	154951845	154958485	L1PA15:L1:LINE	-	Intergenic	chr3	154958733	154959414	LINC01487	+	Non-DE	SRR6368595	Deneault et al. - Neuron	ATRX
chr4	20740248	20746401	L1PA5:L1:LINE	+	Intronic	chr4	20736250	20736358	KCNIP4	-	Non-DE	SRR6368583	Deneault et al. - Neuron	ATRX
chr4	20740248	20746401	L1PA5:L1:LINE	+	Intronic	chr4	20736250	20736358	KCNIP4	-	Non-DE	SRR6368595	Deneault et al. - Neuron	ATRX
chr4	57197420	57203548	L1PA3:L1:LINE	-	Intergenic	chr4	57193809	57196890	CRACD	+	Non-DE	SRR6368583	Deneault et al. - Neuron	ATRX
chr4	62609439	62615587	L1PA3:L1:LINE	+	Intronic	chr4	62598471	62599272	ADGRL3	+	Non-DE	SRR6368575	Deneault et al. - Neuron	ATRX
chr4	71919553	71925574	L1PA3:L1:LINE	-	Intergenic	chr4	71895068	71896629	DCK	+	Non-DE	SRR6368595	Deneault et al. - Neuron	ATRX
chr4	71919553	71925574	L1PA3:L1:LINE	-	Intergenic	chr4	71895068	71896629	DCK	+	Non-DE	SRR6368594	Deneault et al. - Neuron	ATRX
chr4	71919553	71925574	L1PA3:L1:LINE	-	Intergenic	chr4	71895068	71896629	DCK	+	Down-regulated	SRR6368575	Deneault et al. - Neuron	ATRX
chr4	71919553	71925574	L1PA3:L1:LINE	-	Intergenic	chr4	71895068	71896629	DCK	+	Non-DE	SRR6368583	Deneault et al. - Neuron	ATRX
chr4	91596877	91602908	L1HS:L1:LINE	-	Intronic	chr4	91645064	91645142	CCSER1	+	Non-DE	SRR6368594	Deneault et al. - Neuron	ATRX
chr4	91596877	91602908	L1HS:L1:LINE	-	Intronic	chr4	91645064	91645142	CCSER1	+	Non-DE	SRR6368595	Deneault et al. - Neuron	ATRX
chr4	91596877	91602908	L1HS:L1:LINE	-	Intronic	chr4	91645064	91645142	CCSER1	+	Non-DE	SRR6368575	Deneault et al. - Neuron	ATRX
chr4	91596877	91602908	L1HS:L1:LINE	-	Intronic	chr4	91645064	91645142	CCSER1	+	Non-DE	SRR6368583	Deneault et al. - Neuron	ATRX
chr4	104171422	104177447	L1PA2:L1:LINE	-	Intronic	chr4	104119420	104119566	CENPE	-	Non-DE	SRR6368575	Deneault et al. - Neuron	ATRX
chr4	104171422	104177447	L1PA2:L1:LINE	-	Intronic	chr4	104119420	104119566	CENPE	-	Non-DE	SRR6368583	Deneault et al. - Neuron	ATRX
chr4	104171422	104177447	L1PA2:L1:LINE	-	Intronic	chr4	104119420	104119566	CENPE	-	Non-DE	SRR6368594	Deneault et al. - Neuron	ATRX
chr4	104171422	104177447	L1PA2:L1:LINE	-	Intronic	chr4	104119420	104119566	CENPE	-	Non-DE	SRR6368595	Deneault et al. - Neuron	ATRX
chr4	128638142	128644524	L1PA10:L1:LINE	-	Intronic	chr4	128637479	128637934	INTU	+	Up-regulated	SRR6368594	Deneault et al. - Neuron	ATRX
chr4	167664640	167670800	L1PA5:L1:LINE	+	Intronic	chr4	167663147	167663210	SPOCK3	-	Non-DE	SRR6368583	Deneault et al. - Neuron	ATRX
chr5	74002130	74008268	L1PA3:L1:LINE	+	Intronic	chr5	74001043	74001145	HEXB	+	Non-DE	SRR6368594	Deneault et al. - Neuron	ATRX
chr5	77414039	77420179	L1PA4:L1:LINE	+	Intronic	chr5	77411949	77412058	AP3B1	-	Up-regulated	SRR6368594	Deneault et al. - Neuron	ATRX
chr5	82753618	82759636	L1PA2:L1:LINE	-	Intergenic	chr5	82767492	82767842	VCAN	+	Non-DE	SRR6368594	Deneault et al. - Neuron	ATRX
chr5	82753618	82759636	L1PA2:L1:LINE	-	Intergenic	chr5	82767492	82767842	VCAN	+	Non-DE	SRR6368595	Deneault et al. - Neuron	ATRX
chr5	82753618	82759636	L1PA2:L1:LINE	-	Intergenic	chr5	82767492	82767842	VCAN	+	Non-DE	SRR6368575	Deneault et al. - Neuron	ATRX
chr5	82753618	82759636	L1PA2:L1:LINE	-	Intergenic	chr5	82767492	82767842	VCAN	+	Non-DE	SRR6368583	Deneault et al. - Neuron	ATRX
chr6	8770704	8776745	L1PA2:L1:LINE	-	Intronic	chr6	8710841	8712526	LOC100506207	+	Non-DE	SRR6368575	Deneault et al. - Neuron	ATRX
chr6	8770704	8776745	L1PA2:L1:LINE	-	Intronic	chr6	8710841	8712526	LOC100506207	+	Non-DE	SRR6368595	Deneault et al. - Neuron	ATRX
chr6	76609458	76615462	L1PA3:L1:LINE	-	Intronic	chr6	76608089	76608128	MYO6	+	Non-DE	SRR6368575	Deneault et al. - Neuron	ATRX
chr6	76609458	76615462	L1PA3:L1:LINE	-	Intronic	chr6	76608089	76608128	MYO6	+	Non-DE	SRR6368583	Deneault et al. - Neuron	ATRX
chr6	76609458	76615462	L1PA3:L1:LINE	-	Intronic	chr6	76608089	76608128	MYO6	+	Non-DE	SRR6368595	Deneault et al. - Neuron	ATRX
chr6	80287373	80293483	L1PA6:L1:LINE	+	Intergenic	chr6	80248450	80248479	DQ582269	+	Non-DE	SRR6368595	Deneault et al. - Neuron	ATRX
chr6	80287373	80293483	L1PA6:L1:LINE	+	Intergenic	chr6	80248450	80248479	DQ582269	+	Non-DE	SRR6368583	Deneault et al. - Neuron	ATRX
chr7	12536837	12542864	L1PA3:L1:LINE	+	Intronic	chr7	12596186	12596356	BC075797	+	Non-DE	SRR6368575	Deneault et al. - Neuron	ATRX
chr7	12536837	12542864	L1PA3:L1:LINE	+	Intronic	chr7	12596186	12596356	BC075797	+	Non-DE	SRR6368583	Deneault et al. - Neuron	ATRX
chr7	12536837	12542864	L1PA3:L1:LINE	+	Intronic	chr7	12596186	12596356	BC075797	+	Non-DE	SRR6368595	Deneault et al. - Neuron	ATRX
chr7	12536837	12542864	L1PA3:L1:LINE	+	Intronic	chr7	12596186	12596356	BC075797	+	Non-DE	SRR6368594	Deneault et al. - Neuron	ATRX
chr7	39047127	39053152	L1PA2:L1:LINE	-	Exonic	chr7	39053012	39053161	POU6F2-AS2	-	Non-DE	SRR6368594	Deneault et al. - Neuron	ATRX
chr7	39047127	39053152	L1PA2:L1:LINE	-	Exonic	chr7	39053012	39053161	POU6F2-AS2	-	Non-DE	SRR6368595	Deneault et al. - Neuron	ATRX
chr7	39047127	39053152	L1PA2:L1:LINE	-	Exonic	chr7	39053012	39053161	POU6F2-AS2	-	Non-DE	SRR6368583	Deneault et al. - Neuron	ATRX
chr7	39047127	39053152	L1PA2:L1:LINE	-	Exonic	chr7	39053012	39053161	POU6F2-AS2	-	Non-DE	SRR6368575	Deneault et al. - Neuron	ATRX
chr7	86669072	86675084	L1PA2:L1:LINE	+	Intronic	chr7	86688640	86689014	ELAPOR2	-	Non-DE	SRR6368583	Deneault et al. - Neuron	ATRX
chr7	91813070	91819192	L1PA3:L1:LINE	-	Intronic	chr7	91808164	91809228	CYP51A1-AS1	+	Non-DE	SRR6368595	Deneault et al. - Neuron	ATRX
chr7	91813070	91819192	L1PA3:L1:LINE	-	Intronic	chr7	91808164	91809228	CYP51A1-AS1	+	Non-DE	SRR6368583	Deneault et al. - Neuron	ATRX
chr7	91813070	91819192	L1PA3:L1:LINE	-	Intronic	chr7	91808164	91809228	CYP51A1-AS1	+	Non-DE	SRR6368575	Deneault et al. - Neuron	ATRX
chr8	70755535	70761658	L1PA5:L1:LINE	+	Intronic	chr8	70747088	70747299	SLCO5A1	-	Non-DE	SRR6368583	Deneault et al. - Neuron	ATRX
chr8	73968584	73974141	L1PA6:L1:LINE	+	Intronic	chr8	73976777	73979693	SBSPON	-	Up-regulated	SRR6368583	Deneault et al. - Neuron	ATRX
chr9	89656797	89662815	L1PA3:L1:LINE	+	Exonic	chr9	89656785	89657041	LINC02893	-	Non-DE	SRR6368594	Deneault et al. - Neuron	ATRX
chr9	94976690	94982694	L1PA2:L1:LINE	+	Intronic	chr9	94984801	94984954	IARS1	-	Non-DE	SRR6368575	Deneault et al. - Neuron	ATRX
chrUn_gl000214	39518	45655	L1PA3:L1:LINE	-	Intergenic	chrUn_gl000214	32576	32635	BC012753	+	Non-DE	SRR6368595	Deneault et al. - Neuron	ATRX
chrUn_gl000214	39518	45655	L1PA3:L1:LINE	-	Intergenic	chrUn_gl000214	32576	32635	BC012753	+	Non-DE	SRR6368594	Deneault et al. - Neuron	ATRX
chrUn_gl000214	39518	45655	L1PA3:L1:LINE	-	Intergenic	chrUn_gl000214	32576	32635	BC012753	+	Non-DE	SRR6368583	Deneault et al. - Neuron	ATRX
chrUn_gl000214	39518	45655	L1PA3:L1:LINE	-	Intergenic	chrUn_gl000214	32576	32635	BC012753	+	Non-DE	SRR6368575	Deneault et al. - Neuron	ATRX
chrX	11725368	11731399	L1HS:L1:LINE	+	Intronic	chrX	11682360	11683821	ARHGAP6	-	Up-regulated	SRR6368595	Deneault et al. - Neuron	ATRX
chrX	11725368	11731399	L1HS:L1:LINE	+	Intronic	chrX	11682360	11683821	ARHGAP6	-	Non-DE	SRR6368594	Deneault et al. - Neuron	ATRX
chrX	11725368	11731399	L1HS:L1:LINE	+	Intronic	chrX	11682360	11683821	ARHGAP6	-	Up-regulated	SRR6368583	Deneault et al. - Neuron	ATRX
chrX	11725368	11731399	L1HS:L1:LINE	+	Intronic	chrX	11682360	11683821	ARHGAP6	-	Non-DE	SRR6368575	Deneault et al. - Neuron	ATRX
chrX	18123638	18129028	L1PA2:L1:LINE	+	Intergenic	chrX	18181050	18183343	BEND2	-	Non-DE	SRR6368595	Deneault et al. - Neuron	ATRX
chrX	18123638	18129028	L1PA2:L1:LINE	+	Intergenic	chrX	18181050	18183343	BEND2	-	Non-DE	SRR6368583	Deneault et al. - Neuron	ATRX
chrX	18123638	18129028	L1PA2:L1:LINE	+	Intergenic	chrX	18181050	18183343	BEND2	-	Non-DE	SRR6368575	Deneault et al. - Neuron	ATRX
chrX	73253778	73259910	L1PA5:L1:LINE	-	Intronic	chrX	73251430	73251675	FTX	-	Non-DE	SRR6368583	Deneault et al. - Neuron	ATRX
chrX	73260445	73266814	L1PA7:L1:LINE	-	Intronic	chrX	73251430	73251675	FTX	-	Non-DE	SRR6368583	Deneault et al. - Neuron	ATRX
chrX	73291824	73297937	L1PA8:L1:LINE	-	Intronic	chrX	73251430	73251675	FTX	-	Non-DE	SRR6368595	Deneault et al. - Neuron	ATRX
chrX	73291824	73297937	L1PA8:L1:LINE	-	Intronic	chrX	73251430	73251675	FTX	-	Non-DE	SRR6368583	Deneault et al. - Neuron	ATRX
chrX	73291824	73297937	L1PA8:L1:LINE	-	Intronic	chrX	73251430	73251675	FTX	-	Non-DE	SRR6368575	Deneault et al. - Neuron	ATRX
chrX	125319201	125325235	L1PA2:L1:LINE	-	Intergenic	chrX	125297481	125300080	DCAF12L2	-	Non-DE	SRR6368595	Deneault et al. - Neuron	ATRX
chrX	125319201	125325235	L1PA2:L1:LINE	-	Intergenic	chrX	125297481	125300080	DCAF12L2	-	Non-DE	SRR6368594	Deneault et al. - Neuron	ATRX
chrX	125319201	125325235	L1PA2:L1:LINE	-	Intergenic	chrX	125297481	125300080	DCAF12L2	-	Non-DE	SRR6368575	Deneault et al. - Neuron	ATRX
chrX	128374838	128380974	L1PA4:L1:LINE	+	Intronic	chrX	128580477	128581278	SMARCA1	-	Down-regulated	SRR6368575	Deneault et al. - Neuron	ATRX
chrX	128374838	128380974	L1PA4:L1:LINE	+	Intronic	chrX	128580477	128581278	SMARCA1	-	Non-DE	SRR6368595	Deneault et al. - Neuron	ATRX
chrX	128374838	128380974	L1PA4:L1:LINE	+	Intronic	chrX	128580477	128581278	SMARCA1	-	Non-DE	SRR6368583	Deneault et al. - Neuron	ATRX
chrX	130712654	130718709	L1PA2:L1:LINE	+	Intronic	chrX	130678047	130678974	OR13H1	+	Non-DE	SRR6368595	Deneault et al. - Neuron	ATRX
chrX	130712654	130718709	L1PA2:L1:LINE	+	Intronic	chrX	130678047	130678974	OR13H1	+	Non-DE	SRR6368594	Deneault et al. - Neuron	ATRX
chrX	154583984	154589205	L1PA13:L1:LINE	+	Intergenic	chrX	154581173	154581271	RP13-228J13.1	-	Non-DE	SRR6368575	Deneault et al. - Neuron	ATRX
chrX	154583984	154589205	L1PA13:L1:LINE	+	Intergenic	chrX	154581173	154581271	RP13-228J13.1	-	Non-DE	SRR6368583	Deneault et al. - Neuron	ATRX
chrX	154583984	154589205	L1PA13:L1:LINE	+	Intergenic	chrX	154581173	154581271	RP13-228J13.1	-	Non-DE	SRR6368595	Deneault et al. - Neuron	ATRX
chrX	154711018	154716239	L1PA13:L1:LINE	-	Intronic	chrX	154716243	154716707	RP11-218L14.4	+	Non-DE	SRR6368583	Deneault et al. - Neuron	ATRX
chrX	154711018	154716239	L1PA13:L1:LINE	-	Intronic	chrX	154716243	154716707	RP11-218L14.4	+	Non-DE	SRR6368595	Deneault et al. - Neuron	ATRX
chrX	154711018	154716239	L1PA13:L1:LINE	-	Intronic	chrX	154716243	154716707	RP11-218L14.4	+	Non-DE	SRR6368575	Deneault et al. - Neuron	ATRX
chrY	14959405	14965588	L1PA6:L1:LINE	-	Intronic	chrY	14959163	14959252	USP9Y	+	Up-regulated	SRR6368595	Deneault et al. - Neuron	ATRX
chr1	117517360	117523487	L1PA5:L1:LINE	+	Intronic	chr1	117516837	117516945	PTGFRN	+	Up-regulated	SRR6368597	Deneault et al. - Neuron	CACNA1C
chr1	119563254	119569271	L1PA3:L1:LINE	+	Intergenic	chr1	119573838	119575982	WARS2	-	Non-DE	SRR6368577	Deneault et al. - Neuron	CACNA1C
chr1	121316087	121322219	L1PA3:L1:LINE	+	Intronic	chr1	121310573	121313686	EMBP1	+	Non-DE	SRR6368577	Deneault et al. - Neuron	CACNA1C
chr1	143125606	143131754	L1PA2:L1:LINE	-	Intronic	chr1	143119060	143119119	RP11-782C8.1	+	Non-DE	SRR6368577	Deneault et al. - Neuron	CACNA1C
chr1	172560414	172566554	L1PA5:L1:LINE	-	Intronic	chr1	172560123	172560211	SUCO	+	Up-regulated	SRR6368597	Deneault et al. - Neuron	CACNA1C
chr10	55253766	55259783	L1PA3:L1:LINE	-	Intergenic	chr10	55580859	55583118	PCDH15	-	Non-DE	SRR6368577	Deneault et al. - Neuron	CACNA1C
chr10	86039723	86045762	L1PA2:L1:LINE	+	Exonic	chr10	86039735	86039821	LINC00858	+	Non-DE	SRR6368596	Deneault et al. - Neuron	CACNA1C
chr10	96865055	96871181	L1PA6:L1:LINE	-	Intronic	chr10	96828991	96829254	CYP2C8	-	Non-DE	SRR6368577	Deneault et al. - Neuron	CACNA1C
chr10	101400324	101406444	L1PA5:L1:LINE	-	Intergenic	chr10	101419262	101419345	ENTPD7	+	Up-regulated	SRR6368577	Deneault et al. - Neuron	CACNA1C
chr11	7679379	7685402	L1PA2:L1:LINE	-	Intergenic	chr11	7686325	7686777	CYB5R2	-	Up-regulated	SRR6368596	Deneault et al. - Neuron	CACNA1C
chr11	14616306	14622422	L1PA6:L1:LINE	-	Intronic	chr11	14665268	14666599	PDE3B	+	Non-DE	SRR6368577	Deneault et al. - Neuron	CACNA1C
chr11	58638766	58644895	L1PA4:L1:LINE	-	Intronic	chr11	58652423	58652497	AB231721	+	Non-DE	SRR6368596	Deneault et al. - Neuron	CACNA1C
chr11	95169380	95175410	L1HS:L1:LINE	+	Intergenic	chr11	95257193	95257298	5S_rRNA	-	Non-DE	SRR6368577	Deneault et al. - Neuron	CACNA1C
chr11	95169380	95175410	L1HS:L1:LINE	+	Intergenic	chr11	95257193	95257298	5S_rRNA	-	Non-DE	SRR6368596	Deneault et al. - Neuron	CACNA1C
chr12	5225592	5231594	L1PA2:L1:LINE	-	Intergenic	chr12	5153084	5155954	KCNA5	+	Non-DE	SRR6368596	Deneault et al. - Neuron	CACNA1C
chr12	79433401	79439425	L1PA2:L1:LINE	-	Exonic	chr12	79439432	79439606	SYT1	+	Non-DE	SRR6368596	Deneault et al. - Neuron	CACNA1C
chr12	79433401	79439425	L1PA2:L1:LINE	-	Exonic	chr12	79439432	79439606	SYT1	+	Non-DE	SRR6368597	Deneault et al. - Neuron	CACNA1C
chr12	96709720	96715749	L1PA2:L1:LINE	+	Intronic	chr12	96717725	96717890	CDK17	-	Non-DE	SRR6368577	Deneault et al. - Neuron	CACNA1C
chr13	41438707	41444734	L1PA3:L1:LINE	-	Intronic	chr13	41486024	41486859	SUGT1P3	-	Non-DE	SRR6368577	Deneault et al. - Neuron	CACNA1C
chr14	55414793	55420840	L1PA5:L1:LINE	+	Intronic	chr14	55422278	55422412	WDHD1	-	Up-regulated	SRR6368597	Deneault et al. - Neuron	CACNA1C
chr15	28399917	28406027	L1PA5:L1:LINE	-	Intronic	chr15	28397822	28397976	HERC2	-	Up-regulated	SRR6368577	Deneault et al. - Neuron	CACNA1C
chr15	82090271	82096304	L1PA2:L1:LINE	+	Intronic	chr15	82334118	82336954	MEX3B	-	Non-DE	SRR6368577	Deneault et al. - Neuron	CACNA1C
chr15	82090271	82096304	L1PA2:L1:LINE	+	Intronic	chr15	82334118	82336954	MEX3B	-	Non-DE	SRR6368596	Deneault et al. - Neuron	CACNA1C
chr15	82163008	82169040	L1PA2:L1:LINE	+	Intronic	chr15	82334118	82336954	MEX3B	-	Non-DE	SRR6368596	Deneault et al. - Neuron	CACNA1C
chr15	97975923	97982079	L1PA3:L1:LINE	+	Intronic	chr15	97896726	97897019	RN7SL677P	+	Non-DE	SRR6368597	Deneault et al. - Neuron	CACNA1C
chr15	97975923	97982079	L1PA3:L1:LINE	+	Intronic	chr15	97896726	97897019	RN7SL677P	+	Non-DE	SRR6368596	Deneault et al. - Neuron	CACNA1C
chr16	18832575	18838378	L1HS:L1:LINE	-	Intronic	chr16	18839352	18839490	SMG1	-	Non-DE	SRR6368596	Deneault et al. - Neuron	CACNA1C
chr16	18832575	18838378	L1HS:L1:LINE	-	Intronic	chr16	18839352	18839490	SMG1	-	Non-DE	SRR6368597	Deneault et al. - Neuron	CACNA1C
chr16	18832575	18838378	L1HS:L1:LINE	-	Intronic	chr16	18839352	18839490	SMG1	-	Up-regulated	SRR6368577	Deneault et al. - Neuron	CACNA1C
chr16	50377250	50383321	L1PA5:L1:LINE	+	Intronic	chr16	50383933	50384078	BRD7	-	Non-DE	SRR6368597	Deneault et al. - Neuron	CACNA1C
chr18	53382715	53388760	L1PA2:L1:LINE	-	Intronic	chr18	53443957	53447261	LINC01415	-	Non-DE	SRR6368577	Deneault et al. - Neuron	CACNA1C
chr18	53382715	53388760	L1PA2:L1:LINE	-	Intronic	chr18	53443957	53447261	LINC01415	-	Non-DE	SRR6368596	Deneault et al. - Neuron	CACNA1C
chr18	53382715	53388760	L1PA2:L1:LINE	-	Intronic	chr18	53443957	53447261	LINC01415	-	Non-DE	SRR6368597	Deneault et al. - Neuron	CACNA1C
chr2	71638604	71644631	L1HS:L1:LINE	-	Intronic	chr2	71645731	71645769	ZNF638	+	Non-DE	SRR6368597	Deneault et al. - Neuron	CACNA1C
chr2	95758488	95764597	L1PA6:L1:LINE	+	Intronic	chr2	95766218	95766281	MRPS5	-	Up-regulated	SRR6368597	Deneault et al. - Neuron	CACNA1C
chr2	118380829	118386852	L1PA3:L1:LINE	+	Intergenic	chr2	118572254	118572438	DDX18	+	Non-DE	SRR6368596	Deneault et al. - Neuron	CACNA1C
chr20	44100759	44107254	L1PA13:L1:LINE	-	Intronic	chr20	44108581	44108734	WFDC2	+	Non-DE	SRR6368597	Deneault et al. - Neuron	CACNA1C
chr20	52072101	52078105	L1PA3:L1:LINE	-	Intronic	chr20	52103682	52111869	TSHZ2	+	Non-DE	SRR6368596	Deneault et al. - Neuron	CACNA1C
chr20	52072101	52078105	L1PA3:L1:LINE	-	Intronic	chr20	52103682	52111869	TSHZ2	+	Up-regulated	SRR6368597	Deneault et al. - Neuron	CACNA1C
chr20	52120390	52126413	L1PA2:L1:LINE	+	Exonic	chr20	52120647	52120860	RP4-669H2.1	-	Non-DE	SRR6368596	Deneault et al. - Neuron	CACNA1C
chr3	27857474	27863474	L1PA7:L1:LINE	-	Intronic	chr3	27872378	27875073	LINC01981	-	Non-DE	SRR6368577	Deneault et al. - Neuron	CACNA1C
chr3	27857474	27863474	L1PA7:L1:LINE	-	Intronic	chr3	27872378	27875073	LINC01981	-	Non-DE	SRR6368596	Deneault et al. - Neuron	CACNA1C
chr3	58827880	58833905	L1PA2:L1:LINE	+	Intronic	chr3	58817411	58817615	CFAP20DC	-	Non-DE	SRR6368596	Deneault et al. - Neuron	CACNA1C
chr3	58827880	58833905	L1PA2:L1:LINE	+	Intronic	chr3	58817411	58817615	CFAP20DC	-	Non-DE	SRR6368597	Deneault et al. - Neuron	CACNA1C
chr3	134971056	134977072	L1PA2:L1:LINE	-	Intronic	chr3	134977853	134979307	EPHB1	+	Non-DE	SRR6368596	Deneault et al. - Neuron	CACNA1C
chr4	20740248	20746401	L1PA5:L1:LINE	+	Intronic	chr4	20736250	20736358	KCNIP4	-	Non-DE	SRR6368577	Deneault et al. - Neuron	CACNA1C
chr4	20740248	20746401	L1PA5:L1:LINE	+	Intronic	chr4	20736250	20736358	KCNIP4	-	Non-DE	SRR6368597	Deneault et al. - Neuron	CACNA1C
chr4	20740248	20746401	L1PA5:L1:LINE	+	Intronic	chr4	20736250	20736358	KCNIP4	-	Non-DE	SRR6368596	Deneault et al. - Neuron	CACNA1C
chr4	21771611	21778019	L1PA8A:L1:LINE	-	Intronic	chr4	21844963	21854811	KCNIP4-IT1	-	Non-DE	SRR6368596	Deneault et al. - Neuron	CACNA1C
chr4	57197420	57203548	L1PA3:L1:LINE	-	Intergenic	chr4	57193809	57196890	CRACD	+	Non-DE	SRR6368577	Deneault et al. - Neuron	CACNA1C
chr4	69285971	69292051	L1PA6:L1:LINE	+	Intergenic	chr4	69313166	69313241	TMPRSS11E	+	Non-DE	SRR6368596	Deneault et al. - Neuron	CACNA1C
chr4	69285971	69292051	L1PA6:L1:LINE	+	Intergenic	chr4	69313166	69313241	TMPRSS11E	+	Non-DE	SRR6368577	Deneault et al. - Neuron	CACNA1C
chr4	71919553	71925574	L1PA3:L1:LINE	-	Intergenic	chr4	71895068	71896629	DCK	+	Non-DE	SRR6368596	Deneault et al. - Neuron	CACNA1C
chr4	71919553	71925574	L1PA3:L1:LINE	-	Intergenic	chr4	71895068	71896629	DCK	+	Non-DE	SRR6368577	Deneault et al. - Neuron	CACNA1C
chr4	91596877	91602908	L1HS:L1:LINE	-	Intronic	chr4	91645064	91645142	CCSER1	+	Non-DE	SRR6368577	Deneault et al. - Neuron	CACNA1C
chr4	91596877	91602908	L1HS:L1:LINE	-	Intronic	chr4	91645064	91645142	CCSER1	+	Non-DE	SRR6368596	Deneault et al. - Neuron	CACNA1C
chr4	104171422	104177447	L1PA2:L1:LINE	-	Intronic	chr4	104119420	104119566	CENPE	-	Non-DE	SRR6368596	Deneault et al. - Neuron	CACNA1C
chr4	128638142	128644524	L1PA10:L1:LINE	-	Intronic	chr4	128637479	128637934	INTU	+	Up-regulated	SRR6368597	Deneault et al. - Neuron	CACNA1C
chr5	74002130	74008268	L1PA3:L1:LINE	+	Intronic	chr5	74001043	74001145	HEXB	+	Up-regulated	SRR6368597	Deneault et al. - Neuron	CACNA1C
chr6	76609458	76615462	L1PA3:L1:LINE	-	Intronic	chr6	76608089	76608128	MYO6	+	Up-regulated	SRR6368597	Deneault et al. - Neuron	CACNA1C
chr6	98242519	98248408	L1PA4:L1:LINE	+	Intronic	chr6	98155562	98156726	RP11-436D23.1	+	Non-DE	SRR6368597	Deneault et al. - Neuron	CACNA1C
chr6	116959859	116965997	L1PA3:L1:LINE	+	Intronic	chr6	116966876	116967097	ZUP1	-	Non-DE	SRR6368597	Deneault et al. - Neuron	CACNA1C
chr7	12536837	12542864	L1PA3:L1:LINE	+	Intronic	chr7	12596186	12596356	BC075797	+	Non-DE	SRR6368596	Deneault et al. - Neuron	CACNA1C
chr7	39047127	39053152	L1PA2:L1:LINE	-	Exonic	chr7	39053012	39053161	POU6F2-AS2	-	Non-DE	SRR6368596	Deneault et al. - Neuron	CACNA1C
chr8	11672377	11678511	L1PA6:L1:LINE	-	Intronic	chr8	11679258	11679387	FDFT1	+	Up-regulated	SRR6368597	Deneault et al. - Neuron	CACNA1C
chr8	43038791	43044885	L1PA5:L1:LINE	-	Intronic	chr8	43037287	43037403	HGSNAT	+	Non-DE	SRR6368577	Deneault et al. - Neuron	CACNA1C
chr8	63885234	63891726	L1PA7:L1:LINE	-	Exonic	chr8	63890419	63897460	UG0898H09	+	Non-DE	SRR6368577	Deneault et al. - Neuron	CACNA1C
chr9	42690271	42696344	L1PA3:L1:LINE	-	Intronic	chr9	42689821	42689878	CBWD7	+	Non-DE	SRR6368577	Deneault et al. - Neuron	CACNA1C
chr9	70199709	70205784	L1PA3:L1:LINE	+	Intronic	chr9	70195030	70195743	CBWD5	-	Non-DE	SRR6368577	Deneault et al. - Neuron	CACNA1C
chr9	70450620	70456693	L1PA3:L1:LINE	+	Intronic	chr9	70457086	70457143	CBWD5	-	Non-DE	SRR6368577	Deneault et al. - Neuron	CACNA1C
chrUn_gl000211	11314	17387	L1PA3:L1:LINE	+	Intergenic	chrUn_gl000211	21804	23742	CR933660	-	Non-DE	SRR6368577	Deneault et al. - Neuron	CACNA1C
chrUn_gl000214	39518	45655	L1PA3:L1:LINE	-	Intergenic	chrUn_gl000214	32576	32635	BC012753	+	Non-DE	SRR6368577	Deneault et al. - Neuron	CACNA1C
chrX	11725368	11731399	L1HS:L1:LINE	+	Intronic	chrX	11682360	11683821	ARHGAP6	-	Non-DE	SRR6368596	Deneault et al. - Neuron	CACNA1C
chrX	11725368	11731399	L1HS:L1:LINE	+	Intronic	chrX	11682360	11683821	ARHGAP6	-	Non-DE	SRR6368577	Deneault et al. - Neuron	CACNA1C
chrX	73291824	73297937	L1PA8:L1:LINE	-	Intronic	chrX	73251430	73251675	FTX	-	Non-DE	SRR6368597	Deneault et al. - Neuron	CACNA1C
chrX	73291824	73297937	L1PA8:L1:LINE	-	Intronic	chrX	73251430	73251675	FTX	-	Non-DE	SRR6368596	Deneault et al. - Neuron	CACNA1C
chrX	73291824	73297937	L1PA8:L1:LINE	-	Intronic	chrX	73251430	73251675	FTX	-	Non-DE	SRR6368577	Deneault et al. - Neuron	CACNA1C
chr10	101400324	101406444	L1PA5:L1:LINE	-	Intergenic	chr10	101419262	101419345	ENTPD7	+	Non-DE	SRR6368574	Deneault et al. - Neuron	CHD8
chr11	7679379	7685402	L1PA2:L1:LINE	-	Intergenic	chr11	7686325	7686777	CYB5R2	-	Up-regulated	SRR6368598	Deneault et al. - Neuron	CHD8
chr11	11906779	11912696	L1PA10:L1:LINE	+	Intronic	chr11	11906013	11906127	USP47	+	Non-DE	SRR6368599	Deneault et al. - Neuron	CHD8
chr11	14616306	14622422	L1PA6:L1:LINE	-	Intronic	chr11	14665268	14666599	PDE3B	+	Up-regulated	SRR6368574	Deneault et al. - Neuron	CHD8
chr11	95169380	95175410	L1HS:L1:LINE	+	Intergenic	chr11	95257193	95257298	5S_rRNA	-	Non-DE	SRR6368599	Deneault et al. - Neuron	CHD8
chr11	95169380	95175410	L1HS:L1:LINE	+	Intergenic	chr11	95257193	95257298	5S_rRNA	-	Non-DE	SRR6368600	Deneault et al. - Neuron	CHD8
chr11	95169380	95175410	L1HS:L1:LINE	+	Intergenic	chr11	95257193	95257298	5S_rRNA	-	Non-DE	SRR6368598	Deneault et al. - Neuron	CHD8
chr11	95169380	95175410	L1HS:L1:LINE	+	Intergenic	chr11	95257193	95257298	5S_rRNA	-	Non-DE	SRR6368574	Deneault et al. - Neuron	CHD8
chr11	108227658	108233694	L1PA2:L1:LINE	+	Intronic	chr11	108225537	108225601	ATM	+	Up-regulated	SRR6368599	Deneault et al. - Neuron	CHD8
chr12	5225592	5231594	L1PA2:L1:LINE	-	Intergenic	chr12	5153084	5155954	KCNA5	+	Non-DE	SRR6368600	Deneault et al. - Neuron	CHD8
chr12	5225592	5231594	L1PA2:L1:LINE	-	Intergenic	chr12	5153084	5155954	KCNA5	+	Non-DE	SRR6368599	Deneault et al. - Neuron	CHD8
chr12	5225592	5231594	L1PA2:L1:LINE	-	Intergenic	chr12	5153084	5155954	KCNA5	+	Non-DE	SRR6368598	Deneault et al. - Neuron	CHD8
chr12	5225592	5231594	L1PA2:L1:LINE	-	Intergenic	chr12	5153084	5155954	KCNA5	+	Non-DE	SRR6368574	Deneault et al. - Neuron	CHD8
chr12	96709720	96715749	L1PA2:L1:LINE	+	Intronic	chr12	96717725	96717890	CDK17	-	Non-DE	SRR6368574	Deneault et al. - Neuron	CHD8
chr14	55414793	55420840	L1PA5:L1:LINE	+	Intronic	chr14	55422278	55422412	WDHD1	-	Up-regulated	SRR6368599	Deneault et al. - Neuron	CHD8
chr15	28399917	28406027	L1PA5:L1:LINE	-	Intronic	chr15	28397822	28397976	HERC2	-	Up-regulated	SRR6368574	Deneault et al. - Neuron	CHD8
chr15	82090271	82096304	L1PA2:L1:LINE	+	Intronic	chr15	82334118	82336954	MEX3B	-	Non-DE	SRR6368598	Deneault et al. - Neuron	CHD8
chr15	82090271	82096304	L1PA2:L1:LINE	+	Intronic	chr15	82334118	82336954	MEX3B	-	Non-DE	SRR6368574	Deneault et al. - Neuron	CHD8
chr15	82090271	82096304	L1PA2:L1:LINE	+	Intronic	chr15	82334118	82336954	MEX3B	-	Non-DE	SRR6368600	Deneault et al. - Neuron	CHD8
chr15	97975923	97982079	L1PA3:L1:LINE	+	Intronic	chr15	97896726	97897019	RN7SL677P	+	Non-DE	SRR6368600	Deneault et al. - Neuron	CHD8
chr15	97975923	97982079	L1PA3:L1:LINE	+	Intronic	chr15	97896726	97897019	RN7SL677P	+	Non-DE	SRR6368598	Deneault et al. - Neuron	CHD8
chr15	97975923	97982079	L1PA3:L1:LINE	+	Intronic	chr15	97896726	97897019	RN7SL677P	+	Non-DE	SRR6368599	Deneault et al. - Neuron	CHD8
chr16	18832575	18838378	L1HS:L1:LINE	-	Intronic	chr16	18839352	18839490	SMG1	-	Non-DE	SRR6368598	Deneault et al. - Neuron	CHD8
chr16	18832575	18838378	L1HS:L1:LINE	-	Intronic	chr16	18839352	18839490	SMG1	-	Non-DE	SRR6368599	Deneault et al. - Neuron	CHD8
chr16	18832575	18838378	L1HS:L1:LINE	-	Intronic	chr16	18839352	18839490	SMG1	-	Non-DE	SRR6368574	Deneault et al. - Neuron	CHD8
chr17	58958801	58964835	L1PA2:L1:LINE	-	Intronic	chr17	58967055	58967132	BCAS3	+	Non-DE	SRR6368574	Deneault et al. - Neuron	CHD8
chr18	53382715	53388760	L1PA2:L1:LINE	-	Intronic	chr18	53443957	53447261	LINC01415	-	Non-DE	SRR6368574	Deneault et al. - Neuron	CHD8
chr18	53382715	53388760	L1PA2:L1:LINE	-	Intronic	chr18	53443957	53447261	LINC01415	-	Non-DE	SRR6368598	Deneault et al. - Neuron	CHD8
chr18	53382715	53388760	L1PA2:L1:LINE	-	Intronic	chr18	53443957	53447261	LINC01415	-	Non-DE	SRR6368599	Deneault et al. - Neuron	CHD8
chr18	53382715	53388760	L1PA2:L1:LINE	-	Intronic	chr18	53443957	53447261	LINC01415	-	Non-DE	SRR6368600	Deneault et al. - Neuron	CHD8
chr18	75289711	75295821	L1PA6:L1:LINE	+	Intergenic	chr18	74980540	74982096	GALR1	+	Non-DE	SRR6368598	Deneault et al. - Neuron	CHD8
chr18	75289711	75295821	L1PA6:L1:LINE	+	Intergenic	chr18	74980540	74982096	GALR1	+	Non-DE	SRR6368574	Deneault et al. - Neuron	CHD8
chr19	20990530	20996633	L1PA3:L1:LINE	+	Intronic	chr19	20976588	20977403	ZNF66	+	Non-DE	SRR6368599	Deneault et al. - Neuron	CHD8
chr2	24318027	24324128	L1PA6:L1:LINE	+	Intronic	chr2	24307058	24308085	TP53I3	-	Non-DE	SRR6368574	Deneault et al. - Neuron	CHD8
chr2	24318027	24324128	L1PA6:L1:LINE	+	Intronic	chr2	24307058	24308085	TP53I3	-	Non-DE	SRR6368600	Deneault et al. - Neuron	CHD8
chr2	71638604	71644631	L1HS:L1:LINE	-	Intronic	chr2	71645731	71645769	ZNF638	+	Non-DE	SRR6368599	Deneault et al. - Neuron	CHD8
chr2	118380829	118386852	L1PA3:L1:LINE	+	Intergenic	chr2	118572254	118572438	DDX18	+	Non-DE	SRR6368598	Deneault et al. - Neuron	CHD8
chr2	118380829	118386852	L1PA3:L1:LINE	+	Intergenic	chr2	118572254	118572438	DDX18	+	Non-DE	SRR6368599	Deneault et al. - Neuron	CHD8
chr2	118380829	118386852	L1PA3:L1:LINE	+	Intergenic	chr2	118572254	118572438	DDX18	+	Non-DE	SRR6368600	Deneault et al. - Neuron	CHD8
chr2	118380829	118386852	L1PA3:L1:LINE	+	Intergenic	chr2	118572254	118572438	DDX18	+	Non-DE	SRR6368574	Deneault et al. - Neuron	CHD8
chr2	118681259	118686848	L1PA4:L1:LINE	+	Intronic	chr2	118688612	118688726	CCDC93	-	Non-DE	SRR6368600	Deneault et al. - Neuron	CHD8
chr20	52072101	52078105	L1PA3:L1:LINE	-	Intronic	chr20	52103682	52111869	TSHZ2	+	Non-DE	SRR6368598	Deneault et al. - Neuron	CHD8
chr20	52072101	52078105	L1PA3:L1:LINE	-	Intronic	chr20	52103682	52111869	TSHZ2	+	Up-regulated	SRR6368599	Deneault et al. - Neuron	CHD8
chr20	52072101	52078105	L1PA3:L1:LINE	-	Intronic	chr20	52103682	52111869	TSHZ2	+	Non-DE	SRR6368600	Deneault et al. - Neuron	CHD8
chr20	52072101	52078105	L1PA3:L1:LINE	-	Intronic	chr20	52103682	52111869	TSHZ2	+	Non-DE	SRR6368574	Deneault et al. - Neuron	CHD8
chr20	52120390	52126413	L1PA2:L1:LINE	+	Exonic	chr20	52120647	52120860	RP4-669H2.1	-	Non-DE	SRR6368600	Deneault et al. - Neuron	CHD8
chr20	52120390	52126413	L1PA2:L1:LINE	+	Exonic	chr20	52120647	52120860	RP4-669H2.1	-	Non-DE	SRR6368574	Deneault et al. - Neuron	CHD8
chr20	52120390	52126413	L1PA2:L1:LINE	+	Exonic	chr20	52120647	52120860	RP4-669H2.1	-	Non-DE	SRR6368598	Deneault et al. - Neuron	CHD8
chr3	27857474	27863474	L1PA7:L1:LINE	-	Intronic	chr3	27872378	27875073	LINC01981	-	Non-DE	SRR6368574	Deneault et al. - Neuron	CHD8
chr3	27857474	27863474	L1PA7:L1:LINE	-	Intronic	chr3	27872378	27875073	LINC01981	-	Non-DE	SRR6368598	Deneault et al. - Neuron	CHD8
chr3	58827880	58833905	L1PA2:L1:LINE	+	Intronic	chr3	58817411	58817615	CFAP20DC	-	Non-DE	SRR6368600	Deneault et al. - Neuron	CHD8
chr3	58827880	58833905	L1PA2:L1:LINE	+	Intronic	chr3	58817411	58817615	CFAP20DC	-	Non-DE	SRR6368574	Deneault et al. - Neuron	CHD8
chr3	58827880	58833905	L1PA2:L1:LINE	+	Intronic	chr3	58817411	58817615	CFAP20DC	-	Non-DE	SRR6368599	Deneault et al. - Neuron	CHD8
chr3	58827880	58833905	L1PA2:L1:LINE	+	Intronic	chr3	58817411	58817615	CFAP20DC	-	Non-DE	SRR6368598	Deneault et al. - Neuron	CHD8
chr3	134971056	134977072	L1PA2:L1:LINE	-	Intronic	chr3	134977853	134979307	EPHB1	+	Non-DE	SRR6368574	Deneault et al. - Neuron	CHD8
chr3	154951845	154958485	L1PA15:L1:LINE	-	Intergenic	chr3	154958733	154959414	LINC01487	+	Non-DE	SRR6368574	Deneault et al. - Neuron	CHD8
chr3	154951845	154958485	L1PA15:L1:LINE	-	Intergenic	chr3	154958733	154959414	LINC01487	+	Non-DE	SRR6368599	Deneault et al. - Neuron	CHD8
chr3	154951845	154958485	L1PA15:L1:LINE	-	Intergenic	chr3	154958733	154959414	LINC01487	+	Non-DE	SRR6368600	Deneault et al. - Neuron	CHD8
chr4	20740248	20746401	L1PA5:L1:LINE	+	Intronic	chr4	20736250	20736358	KCNIP4	-	Non-DE	SRR6368574	Deneault et al. - Neuron	CHD8
chr4	20740248	20746401	L1PA5:L1:LINE	+	Intronic	chr4	20736250	20736358	KCNIP4	-	Non-DE	SRR6368599	Deneault et al. - Neuron	CHD8
chr4	20740248	20746401	L1PA5:L1:LINE	+	Intronic	chr4	20736250	20736358	KCNIP4	-	Non-DE	SRR6368598	Deneault et al. - Neuron	CHD8
chr4	21771611	21778019	L1PA8A:L1:LINE	-	Intronic	chr4	21844963	21854811	KCNIP4-IT1	-	Non-DE	SRR6368598	Deneault et al. - Neuron	CHD8
chr4	62620336	62626523	L1PA4:L1:LINE	-	Intronic	chr4	62598471	62599272	ADGRL3	+	Non-DE	SRR6368598	Deneault et al. - Neuron	CHD8
chr4	69285971	69292051	L1PA6:L1:LINE	+	Intergenic	chr4	69313166	69313241	TMPRSS11E	+	Non-DE	SRR6368574	Deneault et al. - Neuron	CHD8
chr4	71919553	71925574	L1PA3:L1:LINE	-	Intergenic	chr4	71895068	71896629	DCK	+	Non-DE	SRR6368600	Deneault et al. - Neuron	CHD8
chr4	71919553	71925574	L1PA3:L1:LINE	-	Intergenic	chr4	71895068	71896629	DCK	+	Non-DE	SRR6368598	Deneault et al. - Neuron	CHD8
chr4	71919553	71925574	L1PA3:L1:LINE	-	Intergenic	chr4	71895068	71896629	DCK	+	Non-DE	SRR6368574	Deneault et al. - Neuron	CHD8
chr4	91596877	91602908	L1HS:L1:LINE	-	Intronic	chr4	91645064	91645142	CCSER1	+	Non-DE	SRR6368599	Deneault et al. - Neuron	CHD8
chr4	91596877	91602908	L1HS:L1:LINE	-	Intronic	chr4	91645064	91645142	CCSER1	+	Non-DE	SRR6368600	Deneault et al. - Neuron	CHD8
chr4	91596877	91602908	L1HS:L1:LINE	-	Intronic	chr4	91645064	91645142	CCSER1	+	Non-DE	SRR6368598	Deneault et al. - Neuron	CHD8
chr4	91596877	91602908	L1HS:L1:LINE	-	Intronic	chr4	91645064	91645142	CCSER1	+	Non-DE	SRR6368574	Deneault et al. - Neuron	CHD8
chr4	104171422	104177447	L1PA2:L1:LINE	-	Intronic	chr4	104119420	104119566	CENPE	-	Non-DE	SRR6368600	Deneault et al. - Neuron	CHD8
chr4	104171422	104177447	L1PA2:L1:LINE	-	Intronic	chr4	104119420	104119566	CENPE	-	Up-regulated	SRR6368599	Deneault et al. - Neuron	CHD8
chr4	104171422	104177447	L1PA2:L1:LINE	-	Intronic	chr4	104119420	104119566	CENPE	-	Non-DE	SRR6368598	Deneault et al. - Neuron	CHD8
chr4	104171422	104177447	L1PA2:L1:LINE	-	Intronic	chr4	104119420	104119566	CENPE	-	Non-DE	SRR6368574	Deneault et al. - Neuron	CHD8
chr4	128638142	128644524	L1PA10:L1:LINE	-	Intronic	chr4	128637479	128637934	INTU	+	Up-regulated	SRR6368599	Deneault et al. - Neuron	CHD8
chr5	74002130	74008268	L1PA3:L1:LINE	+	Intronic	chr5	74001043	74001145	HEXB	+	Non-DE	SRR6368599	Deneault et al. - Neuron	CHD8
chr5	74002130	74008268	L1PA3:L1:LINE	+	Intronic	chr5	74001043	74001145	HEXB	+	Up-regulated	SRR6368600	Deneault et al. - Neuron	CHD8
chr5	82753618	82759636	L1PA2:L1:LINE	-	Intergenic	chr5	82767492	82767842	VCAN	+	Non-DE	SRR6368598	Deneault et al. - Neuron	CHD8
chr5	82753618	82759636	L1PA2:L1:LINE	-	Intergenic	chr5	82767492	82767842	VCAN	+	Non-DE	SRR6368574	Deneault et al. - Neuron	CHD8
chr6	76609458	76615462	L1PA3:L1:LINE	-	Intronic	chr6	76608089	76608128	MYO6	+	Up-regulated	SRR6368599	Deneault et al. - Neuron	CHD8
chr6	98242519	98248408	L1PA4:L1:LINE	+	Intronic	chr6	98155562	98156726	RP11-436D23.1	+	Non-DE	SRR6368599	Deneault et al. - Neuron	CHD8
chr7	12536837	12542864	L1PA3:L1:LINE	+	Intronic	chr7	12596186	12596356	BC075797	+	Non-DE	SRR6368598	Deneault et al. - Neuron	CHD8
chr7	12536837	12542864	L1PA3:L1:LINE	+	Intronic	chr7	12596186	12596356	BC075797	+	Non-DE	SRR6368600	Deneault et al. - Neuron	CHD8
chr7	12536837	12542864	L1PA3:L1:LINE	+	Intronic	chr7	12596186	12596356	BC075797	+	Non-DE	SRR6368574	Deneault et al. - Neuron	CHD8
chr7	39047127	39053152	L1PA2:L1:LINE	-	Exonic	chr7	39053012	39053161	POU6F2-AS2	-	Non-DE	SRR6368574	Deneault et al. - Neuron	CHD8
chr7	39047127	39053152	L1PA2:L1:LINE	-	Exonic	chr7	39053012	39053161	POU6F2-AS2	-	Non-DE	SRR6368598	Deneault et al. - Neuron	CHD8
chr8	11672377	11678511	L1PA6:L1:LINE	-	Intronic	chr8	11679258	11679387	FDFT1	+	Non-DE	SRR6368599	Deneault et al. - Neuron	CHD8
chr8	63885234	63891726	L1PA7:L1:LINE	-	Exonic	chr8	63890419	63897460	UG0898H09	+	Non-DE	SRR6368574	Deneault et al. - Neuron	CHD8
chr9	70199709	70205784	L1PA3:L1:LINE	+	Intronic	chr9	70195030	70195743	CBWD5	-	Non-DE	SRR6368574	Deneault et al. - Neuron	CHD8
chr9	89656797	89662815	L1PA3:L1:LINE	+	Exonic	chr9	89656785	89657041	LINC02893	-	Non-DE	SRR6368599	Deneault et al. - Neuron	CHD8
chrX	11725368	11731399	L1HS:L1:LINE	+	Intronic	chrX	11682360	11683821	ARHGAP6	-	Down-regulated	SRR6368574	Deneault et al. - Neuron	CHD8
chrX	11725368	11731399	L1HS:L1:LINE	+	Intronic	chrX	11682360	11683821	ARHGAP6	-	Non-DE	SRR6368600	Deneault et al. - Neuron	CHD8
chrX	11725368	11731399	L1HS:L1:LINE	+	Intronic	chrX	11682360	11683821	ARHGAP6	-	Non-DE	SRR6368598	Deneault et al. - Neuron	CHD8
chrX	128374838	128380974	L1PA4:L1:LINE	+	Intronic	chrX	128580477	128581278	SMARCA1	-	Non-DE	SRR6368574	Deneault et al. - Neuron	CHD8
chrX	130712654	130718709	L1PA2:L1:LINE	+	Intronic	chrX	130678047	130678974	OR13H1	+	Non-DE	SRR6368574	Deneault et al. - Neuron	CHD8
chr1	92853959	92860042	L1PA7:L1:LINE	+	Intronic	chr1	92852567	92853732	RPAP2	+	Up-regulated	SRR6368584	Deneault et al. - Neuron	DLGAP2
chr1	119563254	119569271	L1PA3:L1:LINE	+	Intergenic	chr1	119573838	119575982	WARS2	-	Non-DE	SRR6368576	Deneault et al. - Neuron	DLGAP2
chr1	143125606	143131754	L1PA2:L1:LINE	-	Intronic	chr1	143119060	143119119	RP11-782C8.1	+	Non-DE	SRR6368584	Deneault et al. - Neuron	DLGAP2
chr1	143125606	143131754	L1PA2:L1:LINE	-	Intronic	chr1	143119060	143119119	RP11-782C8.1	+	Non-DE	SRR6368576	Deneault et al. - Neuron	DLGAP2
chr1	172560414	172566554	L1PA5:L1:LINE	-	Intronic	chr1	172560123	172560211	SUCO	+	Up-regulated	SRR6368601	Deneault et al. - Neuron	DLGAP2
chr1	220814954	220821404	L1PA10:L1:LINE	+	Intronic	chr1	220823961	220824062	MARK1	+	Non-DE	SRR6368584	Deneault et al. - Neuron	DLGAP2
chr10	86039723	86045762	L1PA2:L1:LINE	+	Exonic	chr10	86039735	86039821	LINC00858	+	Non-DE	SRR6368601	Deneault et al. - Neuron	DLGAP2
chr10	96865055	96871181	L1PA6:L1:LINE	-	Intronic	chr10	96828991	96829254	CYP2C8	-	Non-DE	SRR6368584	Deneault et al. - Neuron	DLGAP2
chr10	101400324	101406444	L1PA5:L1:LINE	-	Intergenic	chr10	101419262	101419345	ENTPD7	+	Non-DE	SRR6368576	Deneault et al. - Neuron	DLGAP2
chr11	2655404	2661585	L1PA5:L1:LINE	-	Exonic	chr11	2629557	2721228	KCNQ1OT1	-	Non-DE	SRR6368584	Deneault et al. - Neuron	DLGAP2
chr11	7679379	7685402	L1PA2:L1:LINE	-	Intergenic	chr11	7686325	7686777	CYB5R2	-	Up-regulated	SRR6368584	Deneault et al. - Neuron	DLGAP2
chr11	58638766	58644895	L1PA4:L1:LINE	-	Intronic	chr11	58652423	58652497	AB231721	+	Non-DE	SRR6368576	Deneault et al. - Neuron	DLGAP2
chr11	95169380	95175410	L1HS:L1:LINE	+	Intergenic	chr11	95257193	95257298	5S_rRNA	-	Non-DE	SRR6368584	Deneault et al. - Neuron	DLGAP2
chr11	96138784	96144829	L1PA2:L1:LINE	-	Intronic	chr11	96123646	96126727	JRKL	+	Down-regulated	SRR6368576	Deneault et al. - Neuron	DLGAP2
chr11	113094669	113100816	L1PA5:L1:LINE	+	Intronic	chr11	113101917	113101995	NCAM1	+	Non-DE	SRR6368584	Deneault et al. - Neuron	DLGAP2
chr12	4618061	4624067	L1PA2:L1:LINE	+	Intronic	chr12	4626226	4626355	C12orf4	-	Up-regulated	SRR6368584	Deneault et al. - Neuron	DLGAP2
chr12	5225592	5231594	L1PA2:L1:LINE	-	Intergenic	chr12	5153084	5155954	KCNA5	+	Non-DE	SRR6368584	Deneault et al. - Neuron	DLGAP2
chr12	48068016	48073191	L1PA6:L1:LINE	+	Exonic	chr12	48073275	48073377	RPAP3	-	Non-DE	SRR6368602	Deneault et al. - Neuron	DLGAP2
chr12	48068016	48073191	L1PA6:L1:LINE	+	Exonic	chr12	48073275	48073377	RPAP3	-	Up-regulated	SRR6368584	Deneault et al. - Neuron	DLGAP2
chr12	105401334	105407760	L1PA7:L1:LINE	-	Intronic	chr12	105413561	105418257	ALDH1L2	-	Non-DE	SRR6368584	Deneault et al. - Neuron	DLGAP2
chr13	41438707	41444734	L1PA3:L1:LINE	-	Intronic	chr13	41486024	41486859	SUGT1P3	-	Non-DE	SRR6368576	Deneault et al. - Neuron	DLGAP2
chr13	53289490	53295879	L1PA7:L1:LINE	-	Intronic	chr13	53298131	53298245	CNMD	-	Non-DE	SRR6368584	Deneault et al. - Neuron	DLGAP2
chr13	111321942	111328064	L1PA5:L1:LINE	+	Intronic	chr13	111329320	111329450	CARS2	-	Non-DE	SRR6368584	Deneault et al. - Neuron	DLGAP2
chr14	20748206	20754353	L1PA4:L1:LINE	+	Intronic	chr14	20757300	20757905	TTC5	-	Non-DE	SRR6368584	Deneault et al. - Neuron	DLGAP2
chr14	71545567	71552023	L1PA7:L1:LINE	-	Intronic	chr14	71542905	71543136	PCNX1	+	Non-DE	SRR6368584	Deneault et al. - Neuron	DLGAP2
chr15	28399917	28406027	L1PA5:L1:LINE	-	Intronic	chr15	28397822	28397976	HERC2	-	Up-regulated	SRR6368576	Deneault et al. - Neuron	DLGAP2
chr15	56426816	56432826	L1PA2:L1:LINE	-	Intronic	chr15	56434975	56435098	RFX7	-	Up-regulated	SRR6368584	Deneault et al. - Neuron	DLGAP2
chr15	63909208	63914241	L1PA4:L1:LINE	-	Intronic	chr15	63908628	63908881	HERC1	-	Up-regulated	SRR6368584	Deneault et al. - Neuron	DLGAP2
chr15	81960854	81966845	L1PA2:L1:LINE	-	Intronic	chr15	81666329	81666418	TMC3	-	Non-DE	SRR6368601	Deneault et al. - Neuron	DLGAP2
chr15	82090271	82096304	L1PA2:L1:LINE	+	Intronic	chr15	82334118	82336954	MEX3B	-	Non-DE	SRR6368584	Deneault et al. - Neuron	DLGAP2
chr15	82090271	82096304	L1PA2:L1:LINE	+	Intronic	chr15	82334118	82336954	MEX3B	-	Non-DE	SRR6368601	Deneault et al. - Neuron	DLGAP2
chr15	82090271	82096304	L1PA2:L1:LINE	+	Intronic	chr15	82334118	82336954	MEX3B	-	Non-DE	SRR6368576	Deneault et al. - Neuron	DLGAP2
chr15	82163008	82169040	L1PA2:L1:LINE	+	Intronic	chr15	82334118	82336954	MEX3B	-	Non-DE	SRR6368584	Deneault et al. - Neuron	DLGAP2
chr15	97975923	97982079	L1PA3:L1:LINE	+	Intronic	chr15	97896726	97897019	RN7SL677P	+	Non-DE	SRR6368601	Deneault et al. - Neuron	DLGAP2
chr15	97975923	97982079	L1PA3:L1:LINE	+	Intronic	chr15	97896726	97897019	RN7SL677P	+	Non-DE	SRR6368602	Deneault et al. - Neuron	DLGAP2
chr15	97975923	97982079	L1PA3:L1:LINE	+	Intronic	chr15	97896726	97897019	RN7SL677P	+	Non-DE	SRR6368584	Deneault et al. - Neuron	DLGAP2
chr15	102166653	102172678	L1PA2:L1:LINE	+	Intronic	chr15	102182048	102182847	TM2D3	-	Non-DE	SRR6368584	Deneault et al. - Neuron	DLGAP2
chr16	18832575	18838378	L1HS:L1:LINE	-	Intronic	chr16	18839352	18839490	SMG1	-	Up-regulated	SRR6368584	Deneault et al. - Neuron	DLGAP2
chr16	18832575	18838378	L1HS:L1:LINE	-	Intronic	chr16	18839352	18839490	SMG1	-	Up-regulated	SRR6368576	Deneault et al. - Neuron	DLGAP2
chr16	82172856	82178863	L1PA2:L1:LINE	+	Intronic	chr16	82181766	82182468	MPHOSPH6	-	Non-DE	SRR6368576	Deneault et al. - Neuron	DLGAP2
chr18	53382715	53388760	L1PA2:L1:LINE	-	Intronic	chr18	53443957	53447261	LINC01415	-	Non-DE	SRR6368576	Deneault et al. - Neuron	DLGAP2
chr18	53382715	53388760	L1PA2:L1:LINE	-	Intronic	chr18	53443957	53447261	LINC01415	-	Non-DE	SRR6368602	Deneault et al. - Neuron	DLGAP2
chr18	53382715	53388760	L1PA2:L1:LINE	-	Intronic	chr18	53443957	53447261	LINC01415	-	Non-DE	SRR6368601	Deneault et al. - Neuron	DLGAP2
chr18	53382715	53388760	L1PA2:L1:LINE	-	Intronic	chr18	53443957	53447261	LINC01415	-	Non-DE	SRR6368584	Deneault et al. - Neuron	DLGAP2
chr18	75289711	75295821	L1PA6:L1:LINE	+	Intergenic	chr18	74980540	74982096	GALR1	+	Non-DE	SRR6368601	Deneault et al. - Neuron	DLGAP2
chr18	75289711	75295821	L1PA6:L1:LINE	+	Intergenic	chr18	74980540	74982096	GALR1	+	Non-DE	SRR6368584	Deneault et al. - Neuron	DLGAP2
chr19	12017069	12022645	L1PA5:L1:LINE	+	Intronic	chr19	12015463	12015702	ZNF69	+	Up-regulated	SRR6368584	Deneault et al. - Neuron	DLGAP2
chr19	20990530	20996633	L1PA3:L1:LINE	+	Intronic	chr19	20976588	20977403	ZNF66	+	Up-regulated	SRR6368584	Deneault et al. - Neuron	DLGAP2
chr19	40543822	40549961	L1PA4:L1:LINE	-	Intronic	chr19	40534166	40542533	ZNF780B	-	Up-regulated	SRR6368584	Deneault et al. - Neuron	DLGAP2
chr2	71638604	71644631	L1HS:L1:LINE	-	Intronic	chr2	71645731	71645769	ZNF638	+	Non-DE	SRR6368602	Deneault et al. - Neuron	DLGAP2
chr2	118380829	118386852	L1PA3:L1:LINE	+	Intergenic	chr2	118572254	118572438	DDX18	+	Non-DE	SRR6368601	Deneault et al. - Neuron	DLGAP2
chr2	118380829	118386852	L1PA3:L1:LINE	+	Intergenic	chr2	118572254	118572438	DDX18	+	Non-DE	SRR6368584	Deneault et al. - Neuron	DLGAP2
chr2	118681259	118686848	L1PA4:L1:LINE	+	Intronic	chr2	118688612	118688726	CCDC93	-	Non-DE	SRR6368602	Deneault et al. - Neuron	DLGAP2
chr2	170105133	170111166	L1HS:L1:LINE	+	Intronic	chr2	170103887	170104025	LRP2	-	Non-DE	SRR6368584	Deneault et al. - Neuron	DLGAP2
chr20	44100759	44107254	L1PA13:L1:LINE	-	Intronic	chr20	44108581	44108734	WFDC2	+	Non-DE	SRR6368602	Deneault et al. - Neuron	DLGAP2
chr20	52072101	52078105	L1PA3:L1:LINE	-	Intronic	chr20	52103682	52111869	TSHZ2	+	Non-DE	SRR6368601	Deneault et al. - Neuron	DLGAP2
chr20	52072101	52078105	L1PA3:L1:LINE	-	Intronic	chr20	52103682	52111869	TSHZ2	+	Non-DE	SRR6368576	Deneault et al. - Neuron	DLGAP2
chr22	22631182	22637196	L1PA3:L1:LINE	-	Intergenic	chr22	22652522	22652576	CH17-264L24.2	+	Non-DE	SRR6368584	Deneault et al. - Neuron	DLGAP2
chr3	15433014	15439121	L1PA4:L1:LINE	-	Intronic	chr3	15451376	15452944	METTL6	-	Non-DE	SRR6368584	Deneault et al. - Neuron	DLGAP2
chr3	27857474	27863474	L1PA7:L1:LINE	-	Intronic	chr3	27872378	27875073	LINC01981	-	Non-DE	SRR6368576	Deneault et al. - Neuron	DLGAP2
chr3	27857474	27863474	L1PA7:L1:LINE	-	Intronic	chr3	27872378	27875073	LINC01981	-	Non-DE	SRR6368584	Deneault et al. - Neuron	DLGAP2
chr3	43607314	43613339	L1PA2:L1:LINE	+	Exonic	chr3	43607144	43607219	ANO10	-	Non-DE	SRR6368601	Deneault et al. - Neuron	DLGAP2
chr3	51681874	51687951	L1PA6:L1:LINE	+	Intronic	chr3	51680300	51680497	RAD54L2	+	Non-DE	SRR6368584	Deneault et al. - Neuron	DLGAP2
chr3	58827880	58833905	L1PA2:L1:LINE	+	Intronic	chr3	58817411	58817615	CFAP20DC	-	Non-DE	SRR6368576	Deneault et al. - Neuron	DLGAP2
chr3	58827880	58833905	L1PA2:L1:LINE	+	Intronic	chr3	58817411	58817615	CFAP20DC	-	Non-DE	SRR6368601	Deneault et al. - Neuron	DLGAP2
chr3	58827880	58833905	L1PA2:L1:LINE	+	Intronic	chr3	58817411	58817615	CFAP20DC	-	Non-DE	SRR6368584	Deneault et al. - Neuron	DLGAP2
chr3	154951845	154958485	L1PA15:L1:LINE	-	Intergenic	chr3	154958733	154959414	LINC01487	+	Non-DE	SRR6368576	Deneault et al. - Neuron	DLGAP2
chr3	154951845	154958485	L1PA15:L1:LINE	-	Intergenic	chr3	154958733	154959414	LINC01487	+	Non-DE	SRR6368601	Deneault et al. - Neuron	DLGAP2
chr3	154951845	154958485	L1PA15:L1:LINE	-	Intergenic	chr3	154958733	154959414	LINC01487	+	Non-DE	SRR6368602	Deneault et al. - Neuron	DLGAP2
chr4	159638	165778	L1PA4:L1:LINE	-	Intronic	chr4	154701	156490	ZNF718	+	Non-DE	SRR6368584	Deneault et al. - Neuron	DLGAP2
chr4	159638	165778	L1PA4:L1:LINE	-	Intronic	chr4	154701	156490	ZNF718	+	Non-DE	SRR6368584	Deneault et al. - Neuron	DLGAP2
chr4	20740248	20746401	L1PA5:L1:LINE	+	Intronic	chr4	20736250	20736358	KCNIP4	-	Non-DE	SRR6368576	Deneault et al. - Neuron	DLGAP2
chr4	20740248	20746401	L1PA5:L1:LINE	+	Intronic	chr4	20736250	20736358	KCNIP4	-	Non-DE	SRR6368584	Deneault et al. - Neuron	DLGAP2
chr4	20740248	20746401	L1PA5:L1:LINE	+	Intronic	chr4	20736250	20736358	KCNIP4	-	Non-DE	SRR6368601	Deneault et al. - Neuron	DLGAP2
chr4	62609439	62615587	L1PA3:L1:LINE	+	Intronic	chr4	62598471	62599272	ADGRL3	+	Non-DE	SRR6368584	Deneault et al. - Neuron	DLGAP2
chr4	62620336	62626523	L1PA4:L1:LINE	-	Intronic	chr4	62598471	62599272	ADGRL3	+	Non-DE	SRR6368584	Deneault et al. - Neuron	DLGAP2
chr4	71919553	71925574	L1PA3:L1:LINE	-	Intergenic	chr4	71895068	71896629	DCK	+	Non-DE	SRR6368601	Deneault et al. - Neuron	DLGAP2
chr4	71919553	71925574	L1PA3:L1:LINE	-	Intergenic	chr4	71895068	71896629	DCK	+	Non-DE	SRR6368576	Deneault et al. - Neuron	DLGAP2
chr4	91596877	91602908	L1HS:L1:LINE	-	Intronic	chr4	91645064	91645142	CCSER1	+	Non-DE	SRR6368576	Deneault et al. - Neuron	DLGAP2
chr4	91596877	91602908	L1HS:L1:LINE	-	Intronic	chr4	91645064	91645142	CCSER1	+	Non-DE	SRR6368601	Deneault et al. - Neuron	DLGAP2
chr4	91596877	91602908	L1HS:L1:LINE	-	Intronic	chr4	91645064	91645142	CCSER1	+	Non-DE	SRR6368584	Deneault et al. - Neuron	DLGAP2
chr4	104171422	104177447	L1PA2:L1:LINE	-	Intronic	chr4	104119420	104119566	CENPE	-	Non-DE	SRR6368601	Deneault et al. - Neuron	DLGAP2
chr4	167664640	167670800	L1PA5:L1:LINE	+	Intronic	chr4	167663147	167663210	SPOCK3	-	Non-DE	SRR6368584	Deneault et al. - Neuron	DLGAP2
chr5	74002130	74008268	L1PA3:L1:LINE	+	Intronic	chr5	74001043	74001145	HEXB	+	Non-DE	SRR6368584	Deneault et al. - Neuron	DLGAP2
chr5	74002130	74008268	L1PA3:L1:LINE	+	Intronic	chr5	74001043	74001145	HEXB	+	Up-regulated	SRR6368601	Deneault et al. - Neuron	DLGAP2
chr5	74002130	74008268	L1PA3:L1:LINE	+	Intronic	chr5	74001043	74001145	HEXB	+	Non-DE	SRR6368602	Deneault et al. - Neuron	DLGAP2
chr5	82753618	82759636	L1PA2:L1:LINE	-	Intergenic	chr5	82767492	82767842	VCAN	+	Non-DE	SRR6368601	Deneault et al. - Neuron	DLGAP2
chr5	82753618	82759636	L1PA2:L1:LINE	-	Intergenic	chr5	82767492	82767842	VCAN	+	Non-DE	SRR6368576	Deneault et al. - Neuron	DLGAP2
chr5	82753618	82759636	L1PA2:L1:LINE	-	Intergenic	chr5	82767492	82767842	VCAN	+	Non-DE	SRR6368584	Deneault et al. - Neuron	DLGAP2
chr6	76609458	76615462	L1PA3:L1:LINE	-	Intronic	chr6	76608089	76608128	MYO6	+	Non-DE	SRR6368584	Deneault et al. - Neuron	DLGAP2
chr6	76609458	76615462	L1PA3:L1:LINE	-	Intronic	chr6	76608089	76608128	MYO6	+	Non-DE	SRR6368602	Deneault et al. - Neuron	DLGAP2
chr6	80287373	80293483	L1PA6:L1:LINE	+	Intergenic	chr6	80248450	80248479	DQ582269	+	Non-DE	SRR6368584	Deneault et al. - Neuron	DLGAP2
chr7	12536837	12542864	L1PA3:L1:LINE	+	Intronic	chr7	12596186	12596356	BC075797	+	Non-DE	SRR6368601	Deneault et al. - Neuron	DLGAP2
chr7	12536837	12542864	L1PA3:L1:LINE	+	Intronic	chr7	12596186	12596356	BC075797	+	Non-DE	SRR6368584	Deneault et al. - Neuron	DLGAP2
chr7	39047127	39053152	L1PA2:L1:LINE	-	Exonic	chr7	39053012	39053161	POU6F2-AS2	-	Non-DE	SRR6368584	Deneault et al. - Neuron	DLGAP2
chr7	39047127	39053152	L1PA2:L1:LINE	-	Exonic	chr7	39053012	39053161	POU6F2-AS2	-	Non-DE	SRR6368601	Deneault et al. - Neuron	DLGAP2
chr7	91813070	91819192	L1PA3:L1:LINE	-	Intronic	chr7	91808164	91809228	CYP51A1-AS1	+	Non-DE	SRR6368576	Deneault et al. - Neuron	DLGAP2
chr7	91813070	91819192	L1PA3:L1:LINE	-	Intronic	chr7	91808164	91809228	CYP51A1-AS1	+	Non-DE	SRR6368584	Deneault et al. - Neuron	DLGAP2
chr8	43038791	43044885	L1PA5:L1:LINE	-	Intronic	chr8	43037287	43037403	HGSNAT	+	Non-DE	SRR6368576	Deneault et al. - Neuron	DLGAP2
chr8	63885234	63891726	L1PA7:L1:LINE	-	Exonic	chr8	63890419	63897460	UG0898H09	+	Non-DE	SRR6368576	Deneault et al. - Neuron	DLGAP2
chr8	73968584	73974141	L1PA6:L1:LINE	+	Intronic	chr8	73976777	73979693	SBSPON	-	Up-regulated	SRR6368584	Deneault et al. - Neuron	DLGAP2
chr9	42690271	42696344	L1PA3:L1:LINE	-	Intronic	chr9	42689821	42689878	CBWD7	+	Non-DE	SRR6368576	Deneault et al. - Neuron	DLGAP2
chr9	70199709	70205784	L1PA3:L1:LINE	+	Intronic	chr9	70195030	70195743	CBWD5	-	Non-DE	SRR6368576	Deneault et al. - Neuron	DLGAP2
chr9	70450620	70456693	L1PA3:L1:LINE	+	Intronic	chr9	70457086	70457143	CBWD5	-	Non-DE	SRR6368576	Deneault et al. - Neuron	DLGAP2
chr9	94976690	94982694	L1PA2:L1:LINE	+	Intronic	chr9	94984801	94984954	IARS1	-	Non-DE	SRR6368601	Deneault et al. - Neuron	DLGAP2
chrUn_gl000211	11314	17387	L1PA3:L1:LINE	+	Intergenic	chrUn_gl000211	21804	23742	CR933660	-	Non-DE	SRR6368576	Deneault et al. - Neuron	DLGAP2
chrUn_gl000214	39518	45655	L1PA3:L1:LINE	-	Intergenic	chrUn_gl000214	32576	32635	BC012753	+	Non-DE	SRR6368584	Deneault et al. - Neuron	DLGAP2
chrUn_gl000214	39518	45655	L1PA3:L1:LINE	-	Intergenic	chrUn_gl000214	32576	32635	BC012753	+	Non-DE	SRR6368576	Deneault et al. - Neuron	DLGAP2
chrX	11725368	11731399	L1HS:L1:LINE	+	Intronic	chrX	11682360	11683821	ARHGAP6	-	Up-regulated	SRR6368584	Deneault et al. - Neuron	DLGAP2
chrX	11725368	11731399	L1HS:L1:LINE	+	Intronic	chrX	11682360	11683821	ARHGAP6	-	Non-DE	SRR6368576	Deneault et al. - Neuron	DLGAP2
chrX	11725368	11731399	L1HS:L1:LINE	+	Intronic	chrX	11682360	11683821	ARHGAP6	-	Non-DE	SRR6368601	Deneault et al. - Neuron	DLGAP2
chrX	73253778	73259910	L1PA5:L1:LINE	-	Intronic	chrX	73251430	73251675	FTX	-	Non-DE	SRR6368584	Deneault et al. - Neuron	DLGAP2
chrX	73260445	73266814	L1PA7:L1:LINE	-	Intronic	chrX	73251430	73251675	FTX	-	Non-DE	SRR6368584	Deneault et al. - Neuron	DLGAP2
chrX	73291824	73297937	L1PA8:L1:LINE	-	Intronic	chrX	73251430	73251675	FTX	-	Non-DE	SRR6368602	Deneault et al. - Neuron	DLGAP2
chrX	73291824	73297937	L1PA8:L1:LINE	-	Intronic	chrX	73251430	73251675	FTX	-	Non-DE	SRR6368584	Deneault et al. - Neuron	DLGAP2
chrX	73291824	73297937	L1PA8:L1:LINE	-	Intronic	chrX	73251430	73251675	FTX	-	Non-DE	SRR6368576	Deneault et al. - Neuron	DLGAP2
chrX	125319201	125325235	L1PA2:L1:LINE	-	Intergenic	chrX	125297481	125300080	DCAF12L2	-	Non-DE	SRR6368602	Deneault et al. - Neuron	DLGAP2
chrX	128374838	128380974	L1PA4:L1:LINE	+	Intronic	chrX	128580477	128581278	SMARCA1	-	Up-regulated	SRR6368584	Deneault et al. - Neuron	DLGAP2
chrX	130712654	130718709	L1PA2:L1:LINE	+	Intronic	chrX	130678047	130678974	OR13H1	+	Non-DE	SRR6368576	Deneault et al. - Neuron	DLGAP2
chrX	130712654	130718709	L1PA2:L1:LINE	+	Intronic	chrX	130678047	130678974	OR13H1	+	Non-DE	SRR6368601	Deneault et al. - Neuron	DLGAP2
chrY	14959405	14965588	L1PA6:L1:LINE	-	Intronic	chrY	14959163	14959252	USP9Y	+	Non-DE	SRR6368602	Deneault et al. - Neuron	DLGAP2
chr1	43580198	43586187	L1PA2:L1:LINE	-	Exonic	chr1	43585818	43585943	FAM183A	+	Non-DE	SRR6368585	Deneault et al. - Neuron	KCNQ2
chr1	92853959	92860042	L1PA7:L1:LINE	+	Intronic	chr1	92852567	92853732	RPAP2	+	Up-regulated	SRR6368586	Deneault et al. - Neuron	KCNQ2
chr1	119563254	119569271	L1PA3:L1:LINE	+	Intergenic	chr1	119573838	119575982	WARS2	-	Non-DE	SRR6368572	Deneault et al. - Neuron	KCNQ2
chr1	143125606	143131754	L1PA2:L1:LINE	-	Intronic	chr1	143119060	143119119	RP11-782C8.1	+	Non-DE	SRR6368586	Deneault et al. - Neuron	KCNQ2
chr1	143125606	143131754	L1PA2:L1:LINE	-	Intronic	chr1	143119060	143119119	RP11-782C8.1	+	Non-DE	SRR6368585	Deneault et al. - Neuron	KCNQ2
chr1	149923964	149930070	L1PA5:L1:LINE	-	Intronic	chr1	149931602	149931715	OTUD7B	-	Non-DE	SRR6368585	Deneault et al. - Neuron	KCNQ2
chr1	171519607	171525696	L1PA6:L1:LINE	-	Intronic	chr1	171519224	171519379	PRRC2C	+	Up-regulated	SRR6368586	Deneault et al. - Neuron	KCNQ2
chr1	220814954	220821404	L1PA10:L1:LINE	+	Intronic	chr1	220823961	220824062	MARK1	+	Non-DE	SRR6368606	Deneault et al. - Neuron	KCNQ2
chr1	220814954	220821404	L1PA10:L1:LINE	+	Intronic	chr1	220823961	220824062	MARK1	+	Non-DE	SRR6368585	Deneault et al. - Neuron	KCNQ2
chr10	101400324	101406444	L1PA5:L1:LINE	-	Intergenic	chr10	101419262	101419345	ENTPD7	+	Non-DE	SRR6368572	Deneault et al. - Neuron	KCNQ2
chr11	7679379	7685402	L1PA2:L1:LINE	-	Intergenic	chr11	7686325	7686777	CYB5R2	-	Non-DE	SRR6368585	Deneault et al. - Neuron	KCNQ2
chr11	11906779	11912696	L1PA10:L1:LINE	+	Intronic	chr11	11906013	11906127	USP47	+	Non-DE	SRR6368586	Deneault et al. - Neuron	KCNQ2
chr11	11906779	11912696	L1PA10:L1:LINE	+	Intronic	chr11	11906013	11906127	USP47	+	Non-DE	SRR6368606	Deneault et al. - Neuron	KCNQ2
chr11	14616306	14622422	L1PA6:L1:LINE	-	Intronic	chr11	14665268	14666599	PDE3B	+	Non-DE	SRR6368572	Deneault et al. - Neuron	KCNQ2
chr11	14616306	14622422	L1PA6:L1:LINE	-	Intronic	chr11	14665268	14666599	PDE3B	+	Non-DE	SRR6368586	Deneault et al. - Neuron	KCNQ2
chr11	58638766	58644895	L1PA4:L1:LINE	-	Intronic	chr11	58652423	58652497	AB231721	+	Non-DE	SRR6368585	Deneault et al. - Neuron	KCNQ2
chr11	95169380	95175410	L1HS:L1:LINE	+	Intergenic	chr11	95257193	95257298	5S_rRNA	-	Non-DE	SRR6368606	Deneault et al. - Neuron	KCNQ2
chr11	95169380	95175410	L1HS:L1:LINE	+	Intergenic	chr11	95257193	95257298	5S_rRNA	-	Non-DE	SRR6368572	Deneault et al. - Neuron	KCNQ2
chr11	95169380	95175410	L1HS:L1:LINE	+	Intergenic	chr11	95257193	95257298	5S_rRNA	-	Non-DE	SRR6368586	Deneault et al. - Neuron	KCNQ2
chr11	96138784	96144829	L1PA2:L1:LINE	-	Intronic	chr11	96123646	96126727	JRKL	+	Up-regulated	SRR6368586	Deneault et al. - Neuron	KCNQ2
chr12	4618061	4624067	L1PA2:L1:LINE	+	Intronic	chr12	4626226	4626355	C12orf4	-	Non-DE	SRR6368585	Deneault et al. - Neuron	KCNQ2
chr12	5225592	5231594	L1PA2:L1:LINE	-	Intergenic	chr12	5153084	5155954	KCNA5	+	Non-DE	SRR6368585	Deneault et al. - Neuron	KCNQ2
chr12	5225592	5231594	L1PA2:L1:LINE	-	Intergenic	chr12	5153084	5155954	KCNA5	+	Non-DE	SRR6368586	Deneault et al. - Neuron	KCNQ2
chr12	48068016	48073191	L1PA6:L1:LINE	+	Exonic	chr12	48073275	48073377	RPAP3	-	Non-DE	SRR6368606	Deneault et al. - Neuron	KCNQ2
chr12	48068016	48073191	L1PA6:L1:LINE	+	Exonic	chr12	48073275	48073377	RPAP3	-	Up-regulated	SRR6368586	Deneault et al. - Neuron	KCNQ2
chr12	96709720	96715749	L1PA2:L1:LINE	+	Intronic	chr12	96717725	96717890	CDK17	-	Up-regulated	SRR6368572	Deneault et al. - Neuron	KCNQ2
chr13	53289490	53295879	L1PA7:L1:LINE	-	Intronic	chr13	53298131	53298245	CNMD	-	Non-DE	SRR6368572	Deneault et al. - Neuron	KCNQ2
chr14	55414793	55420840	L1PA5:L1:LINE	+	Intronic	chr14	55422278	55422412	WDHD1	-	Non-DE	SRR6368606	Deneault et al. - Neuron	KCNQ2
chr14	55414793	55420840	L1PA5:L1:LINE	+	Intronic	chr14	55422278	55422412	WDHD1	-	Up-regulated	SRR6368585	Deneault et al. - Neuron	KCNQ2
chr15	28399917	28406027	L1PA5:L1:LINE	-	Intronic	chr15	28397822	28397976	HERC2	-	Up-regulated	SRR6368572	Deneault et al. - Neuron	KCNQ2
chr15	56426816	56432826	L1PA2:L1:LINE	-	Intronic	chr15	56434975	56435098	RFX7	-	Non-DE	SRR6368572	Deneault et al. - Neuron	KCNQ2
chr15	63909208	63914241	L1PA4:L1:LINE	-	Intronic	chr15	63908628	63908881	HERC1	-	Non-DE	SRR6368585	Deneault et al. - Neuron	KCNQ2
chr15	82090271	82096304	L1PA2:L1:LINE	+	Intronic	chr15	82334118	82336954	MEX3B	-	Non-DE	SRR6368586	Deneault et al. - Neuron	KCNQ2
chr15	82090271	82096304	L1PA2:L1:LINE	+	Intronic	chr15	82334118	82336954	MEX3B	-	Non-DE	SRR6368572	Deneault et al. - Neuron	KCNQ2
chr15	82163008	82169040	L1PA2:L1:LINE	+	Intronic	chr15	82334118	82336954	MEX3B	-	Non-DE	SRR6368586	Deneault et al. - Neuron	KCNQ2
chr15	82163008	82169040	L1PA2:L1:LINE	+	Intronic	chr15	82334118	82336954	MEX3B	-	Non-DE	SRR6368585	Deneault et al. - Neuron	KCNQ2
chr15	82287507	82293537	L1PA2:L1:LINE	+	Intronic	chr15	82334118	82336954	MEX3B	-	Non-DE	SRR6368572	Deneault et al. - Neuron	KCNQ2
chr15	82287507	82293537	L1PA2:L1:LINE	+	Intronic	chr15	82334118	82336954	MEX3B	-	Non-DE	SRR6368585	Deneault et al. - Neuron	KCNQ2
chr15	97975923	97982079	L1PA3:L1:LINE	+	Intronic	chr15	97896726	97897019	RN7SL677P	+	Non-DE	SRR6368606	Deneault et al. - Neuron	KCNQ2
chr15	97975923	97982079	L1PA3:L1:LINE	+	Intronic	chr15	97896726	97897019	RN7SL677P	+	Non-DE	SRR6368585	Deneault et al. - Neuron	KCNQ2
chr15	97975923	97982079	L1PA3:L1:LINE	+	Intronic	chr15	97896726	97897019	RN7SL677P	+	Non-DE	SRR6368586	Deneault et al. - Neuron	KCNQ2
chr16	18832575	18838378	L1HS:L1:LINE	-	Intronic	chr16	18839352	18839490	SMG1	-	Up-regulated	SRR6368585	Deneault et al. - Neuron	KCNQ2
chr16	18832575	18838378	L1HS:L1:LINE	-	Intronic	chr16	18839352	18839490	SMG1	-	Up-regulated	SRR6368586	Deneault et al. - Neuron	KCNQ2
chr16	18832575	18838378	L1HS:L1:LINE	-	Intronic	chr16	18839352	18839490	SMG1	-	Non-DE	SRR6368606	Deneault et al. - Neuron	KCNQ2
chr16	18832575	18838378	L1HS:L1:LINE	-	Intronic	chr16	18839352	18839490	SMG1	-	Non-DE	SRR6368572	Deneault et al. - Neuron	KCNQ2
chr17	58958801	58964835	L1PA2:L1:LINE	-	Intronic	chr17	58967055	58967132	BCAS3	+	Non-DE	SRR6368572	Deneault et al. - Neuron	KCNQ2
chr17	58958801	58964835	L1PA2:L1:LINE	-	Intronic	chr17	58967055	58967132	BCAS3	+	Non-DE	SRR6368585	Deneault et al. - Neuron	KCNQ2
chr17	58958801	58964835	L1PA2:L1:LINE	-	Intronic	chr17	58967055	58967132	BCAS3	+	Non-DE	SRR6368586	Deneault et al. - Neuron	KCNQ2
chr18	53382715	53388760	L1PA2:L1:LINE	-	Intronic	chr18	53443957	53447261	LINC01415	-	Non-DE	SRR6368606	Deneault et al. - Neuron	KCNQ2
chr18	53382715	53388760	L1PA2:L1:LINE	-	Intronic	chr18	53443957	53447261	LINC01415	-	Non-DE	SRR6368586	Deneault et al. - Neuron	KCNQ2
chr18	53382715	53388760	L1PA2:L1:LINE	-	Intronic	chr18	53443957	53447261	LINC01415	-	Non-DE	SRR6368585	Deneault et al. - Neuron	KCNQ2
chr18	53382715	53388760	L1PA2:L1:LINE	-	Intronic	chr18	53443957	53447261	LINC01415	-	Non-DE	SRR6368572	Deneault et al. - Neuron	KCNQ2
chr18	75289711	75295821	L1PA6:L1:LINE	+	Intergenic	chr18	74980540	74982096	GALR1	+	Non-DE	SRR6368585	Deneault et al. - Neuron	KCNQ2
chr18	75289711	75295821	L1PA6:L1:LINE	+	Intergenic	chr18	74980540	74982096	GALR1	+	Non-DE	SRR6368586	Deneault et al. - Neuron	KCNQ2
chr19	12017069	12022645	L1PA5:L1:LINE	+	Intronic	chr19	12015463	12015702	ZNF69	+	Up-regulated	SRR6368586	Deneault et al. - Neuron	KCNQ2
chr19	12017069	12022645	L1PA5:L1:LINE	+	Intronic	chr19	12015463	12015702	ZNF69	+	Up-regulated	SRR6368585	Deneault et al. - Neuron	KCNQ2
chr19	20990530	20996633	L1PA3:L1:LINE	+	Intronic	chr19	20976588	20977403	ZNF66	+	Up-regulated	SRR6368585	Deneault et al. - Neuron	KCNQ2
chr19	40543822	40549961	L1PA4:L1:LINE	-	Intronic	chr19	40534166	40542533	ZNF780B	-	Non-DE	SRR6368606	Deneault et al. - Neuron	KCNQ2
chr19	40543822	40549961	L1PA4:L1:LINE	-	Intronic	chr19	40534166	40542533	ZNF780B	-	Up-regulated	SRR6368585	Deneault et al. - Neuron	KCNQ2
chr2	24318027	24324128	L1PA6:L1:LINE	+	Intronic	chr2	24307058	24308085	TP53I3	-	Non-DE	SRR6368586	Deneault et al. - Neuron	KCNQ2
chr2	71638604	71644631	L1HS:L1:LINE	-	Intronic	chr2	71645731	71645769	ZNF638	+	Non-DE	SRR6368606	Deneault et al. - Neuron	KCNQ2
chr2	95758488	95764597	L1PA6:L1:LINE	+	Intronic	chr2	95766218	95766281	MRPS5	-	Up-regulated	SRR6368606	Deneault et al. - Neuron	KCNQ2
chr2	118380829	118386852	L1PA3:L1:LINE	+	Intergenic	chr2	118572254	118572438	DDX18	+	Non-DE	SRR6368585	Deneault et al. - Neuron	KCNQ2
chr2	118380829	118386852	L1PA3:L1:LINE	+	Intergenic	chr2	118572254	118572438	DDX18	+	Non-DE	SRR6368586	Deneault et al. - Neuron	KCNQ2
chr2	118681259	118686848	L1PA4:L1:LINE	+	Intronic	chr2	118688612	118688726	CCDC93	-	Up-regulated	SRR6368606	Deneault et al. - Neuron	KCNQ2
chr20	44100759	44107254	L1PA13:L1:LINE	-	Intronic	chr20	44108581	44108734	WFDC2	+	Non-DE	SRR6368606	Deneault et al. - Neuron	KCNQ2
chr20	52072101	52078105	L1PA3:L1:LINE	-	Intronic	chr20	52103682	52111869	TSHZ2	+	Non-DE	SRR6368586	Deneault et al. - Neuron	KCNQ2
chr20	52072101	52078105	L1PA3:L1:LINE	-	Intronic	chr20	52103682	52111869	TSHZ2	+	Non-DE	SRR6368572	Deneault et al. - Neuron	KCNQ2
chr20	52072101	52078105	L1PA3:L1:LINE	-	Intronic	chr20	52103682	52111869	TSHZ2	+	Non-DE	SRR6368585	Deneault et al. - Neuron	KCNQ2
chr20	52120390	52126413	L1PA2:L1:LINE	+	Exonic	chr20	52120647	52120860	RP4-669H2.1	-	Non-DE	SRR6368586	Deneault et al. - Neuron	KCNQ2
chr20	52120390	52126413	L1PA2:L1:LINE	+	Exonic	chr20	52120647	52120860	RP4-669H2.1	-	Non-DE	SRR6368572	Deneault et al. - Neuron	KCNQ2
chr20	52120390	52126413	L1PA2:L1:LINE	+	Exonic	chr20	52120647	52120860	RP4-669H2.1	-	Non-DE	SRR6368585	Deneault et al. - Neuron	KCNQ2
chr21	35297926	35303910	L1PA2:L1:LINE	-	Exonic	chr21	35303515	35304046	LINC00649	+	Non-DE	SRR6368585	Deneault et al. - Neuron	KCNQ2
chr22	22631182	22637196	L1PA3:L1:LINE	-	Intergenic	chr22	22652522	22652576	CH17-264L24.2	+	Non-DE	SRR6368585	Deneault et al. - Neuron	KCNQ2
chr22	22631182	22637196	L1PA3:L1:LINE	-	Intergenic	chr22	22652522	22652576	CH17-264L24.2	+	Non-DE	SRR6368586	Deneault et al. - Neuron	KCNQ2
chr22	22631182	22637196	L1PA3:L1:LINE	-	Intergenic	chr22	22652522	22652576	CH17-264L24.2	+	Non-DE	SRR6368606	Deneault et al. - Neuron	KCNQ2
chr3	27857474	27863474	L1PA7:L1:LINE	-	Intronic	chr3	27872378	27875073	LINC01981	-	Non-DE	SRR6368586	Deneault et al. - Neuron	KCNQ2
chr3	27857474	27863474	L1PA7:L1:LINE	-	Intronic	chr3	27872378	27875073	LINC01981	-	Non-DE	SRR6368585	Deneault et al. - Neuron	KCNQ2
chr3	27857474	27863474	L1PA7:L1:LINE	-	Intronic	chr3	27872378	27875073	LINC01981	-	Non-DE	SRR6368572	Deneault et al. - Neuron	KCNQ2
chr3	58827880	58833905	L1PA2:L1:LINE	+	Intronic	chr3	58817411	58817615	CFAP20DC	-	Non-DE	SRR6368586	Deneault et al. - Neuron	KCNQ2
chr3	58827880	58833905	L1PA2:L1:LINE	+	Intronic	chr3	58817411	58817615	CFAP20DC	-	Non-DE	SRR6368606	Deneault et al. - Neuron	KCNQ2
chr3	58827880	58833905	L1PA2:L1:LINE	+	Intronic	chr3	58817411	58817615	CFAP20DC	-	Non-DE	SRR6368572	Deneault et al. - Neuron	KCNQ2
chr3	58827880	58833905	L1PA2:L1:LINE	+	Intronic	chr3	58817411	58817615	CFAP20DC	-	Non-DE	SRR6368585	Deneault et al. - Neuron	KCNQ2
chr3	134971056	134977072	L1PA2:L1:LINE	-	Intronic	chr3	134977853	134979307	EPHB1	+	Non-DE	SRR6368572	Deneault et al. - Neuron	KCNQ2
chr3	134971056	134977072	L1PA2:L1:LINE	-	Intronic	chr3	134977853	134979307	EPHB1	+	Non-DE	SRR6368586	Deneault et al. - Neuron	KCNQ2
chr3	154951845	154958485	L1PA15:L1:LINE	-	Intergenic	chr3	154958733	154959414	LINC01487	+	Non-DE	SRR6368586	Deneault et al. - Neuron	KCNQ2
chr3	154951845	154958485	L1PA15:L1:LINE	-	Intergenic	chr3	154958733	154959414	LINC01487	+	Non-DE	SRR6368606	Deneault et al. - Neuron	KCNQ2
chr4	20740248	20746401	L1PA5:L1:LINE	+	Intronic	chr4	20736250	20736358	KCNIP4	-	Non-DE	SRR6368585	Deneault et al. - Neuron	KCNQ2
chr4	20740248	20746401	L1PA5:L1:LINE	+	Intronic	chr4	20736250	20736358	KCNIP4	-	Non-DE	SRR6368586	Deneault et al. - Neuron	KCNQ2
chr4	57197420	57203548	L1PA3:L1:LINE	-	Intergenic	chr4	57193809	57196890	CRACD	+	Non-DE	SRR6368572	Deneault et al. - Neuron	KCNQ2
chr4	62620336	62626523	L1PA4:L1:LINE	-	Intronic	chr4	62598471	62599272	ADGRL3	+	Non-DE	SRR6368585	Deneault et al. - Neuron	KCNQ2
chr4	62620336	62626523	L1PA4:L1:LINE	-	Intronic	chr4	62598471	62599272	ADGRL3	+	Non-DE	SRR6368572	Deneault et al. - Neuron	KCNQ2
chr4	71919553	71925574	L1PA3:L1:LINE	-	Intergenic	chr4	71895068	71896629	DCK	+	Non-DE	SRR6368586	Deneault et al. - Neuron	KCNQ2
chr4	71919553	71925574	L1PA3:L1:LINE	-	Intergenic	chr4	71895068	71896629	DCK	+	Non-DE	SRR6368572	Deneault et al. - Neuron	KCNQ2
chr4	87645970	87652087	L1PA6:L1:LINE	-	Intronic	chr4	87653552	87653627	PTPN13	+	Up-regulated	SRR6368585	Deneault et al. - Neuron	KCNQ2
chr4	91596877	91602908	L1HS:L1:LINE	-	Intronic	chr4	91645064	91645142	CCSER1	+	Non-DE	SRR6368572	Deneault et al. - Neuron	KCNQ2
chr4	91596877	91602908	L1HS:L1:LINE	-	Intronic	chr4	91645064	91645142	CCSER1	+	Non-DE	SRR6368585	Deneault et al. - Neuron	KCNQ2
chr4	91596877	91602908	L1HS:L1:LINE	-	Intronic	chr4	91645064	91645142	CCSER1	+	Non-DE	SRR6368586	Deneault et al. - Neuron	KCNQ2
chr4	104171422	104177447	L1PA2:L1:LINE	-	Intronic	chr4	104119420	104119566	CENPE	-	Up-regulated	SRR6368585	Deneault et al. - Neuron	KCNQ2
chr4	104171422	104177447	L1PA2:L1:LINE	-	Intronic	chr4	104119420	104119566	CENPE	-	Non-DE	SRR6368586	Deneault et al. - Neuron	KCNQ2
chr4	128638142	128644524	L1PA10:L1:LINE	-	Intronic	chr4	128637479	128637934	INTU	+	Up-regulated	SRR6368606	Deneault et al. - Neuron	KCNQ2
chr4	167664640	167670800	L1PA5:L1:LINE	+	Intronic	chr4	167663147	167663210	SPOCK3	-	Non-DE	SRR6368585	Deneault et al. - Neuron	KCNQ2
chr4	167664640	167670800	L1PA5:L1:LINE	+	Intronic	chr4	167663147	167663210	SPOCK3	-	Non-DE	SRR6368572	Deneault et al. - Neuron	KCNQ2
chr5	74002130	74008268	L1PA3:L1:LINE	+	Intronic	chr5	74001043	74001145	HEXB	+	Down-regulated	SRR6368586	Deneault et al. - Neuron	KCNQ2
chr5	74002130	74008268	L1PA3:L1:LINE	+	Intronic	chr5	74001043	74001145	HEXB	+	Non-DE	SRR6368606	Deneault et al. - Neuron	KCNQ2
chr5	82753618	82759636	L1PA2:L1:LINE	-	Intergenic	chr5	82767492	82767842	VCAN	+	Non-DE	SRR6368572	Deneault et al. - Neuron	KCNQ2
chr5	82753618	82759636	L1PA2:L1:LINE	-	Intergenic	chr5	82767492	82767842	VCAN	+	Non-DE	SRR6368586	Deneault et al. - Neuron	KCNQ2
chr5	82753618	82759636	L1PA2:L1:LINE	-	Intergenic	chr5	82767492	82767842	VCAN	+	Non-DE	SRR6368585	Deneault et al. - Neuron	KCNQ2
chr5	139831619	139837446	L1PA5:L1:LINE	+	Intronic	chr5	139838209	139838447	ANKHD1-EIF4EBP3	+	Non-DE	SRR6368585	Deneault et al. - Neuron	KCNQ2
chr5	139831619	139837446	L1PA5:L1:LINE	+	Intronic	chr5	139838209	139838447	ANKHD1-EIF4EBP3	+	Non-DE	SRR6368586	Deneault et al. - Neuron	KCNQ2
chr6	76609458	76615462	L1PA3:L1:LINE	-	Intronic	chr6	76608089	76608128	MYO6	+	Non-DE	SRR6368585	Deneault et al. - Neuron	KCNQ2
chr6	76609458	76615462	L1PA3:L1:LINE	-	Intronic	chr6	76608089	76608128	MYO6	+	Non-DE	SRR6368606	Deneault et al. - Neuron	KCNQ2
chr6	80287373	80293483	L1PA6:L1:LINE	+	Intergenic	chr6	80248450	80248479	DQ582269	+	Non-DE	SRR6368585	Deneault et al. - Neuron	KCNQ2
chr7	12536837	12542864	L1PA3:L1:LINE	+	Intronic	chr7	12596186	12596356	BC075797	+	Non-DE	SRR6368586	Deneault et al. - Neuron	KCNQ2
chr7	17846287	17852748	L1PA7:L1:LINE	+	Intronic	chr7	17854456	17854567	SNX13	-	Up-regulated	SRR6368586	Deneault et al. - Neuron	KCNQ2
chr7	39047127	39053152	L1PA2:L1:LINE	-	Exonic	chr7	39053012	39053161	POU6F2-AS2	-	Non-DE	SRR6368585	Deneault et al. - Neuron	KCNQ2
chr7	39047127	39053152	L1PA2:L1:LINE	-	Exonic	chr7	39053012	39053161	POU6F2-AS2	-	Non-DE	SRR6368586	Deneault et al. - Neuron	KCNQ2
chr7	91813070	91819192	L1PA3:L1:LINE	-	Intronic	chr7	91808164	91809228	CYP51A1-AS1	+	Non-DE	SRR6368572	Deneault et al. - Neuron	KCNQ2
chr7	91813070	91819192	L1PA3:L1:LINE	-	Intronic	chr7	91808164	91809228	CYP51A1-AS1	+	Non-DE	SRR6368585	Deneault et al. - Neuron	KCNQ2
chr7	91813070	91819192	L1PA3:L1:LINE	-	Intronic	chr7	91808164	91809228	CYP51A1-AS1	+	Non-DE	SRR6368586	Deneault et al. - Neuron	KCNQ2
chr8	43038791	43044885	L1PA5:L1:LINE	-	Intronic	chr8	43037287	43037403	HGSNAT	+	Non-DE	SRR6368572	Deneault et al. - Neuron	KCNQ2
chr8	63885234	63891726	L1PA7:L1:LINE	-	Exonic	chr8	63890419	63897460	UG0898H09	+	Non-DE	SRR6368572	Deneault et al. - Neuron	KCNQ2
chr9	42690271	42696344	L1PA3:L1:LINE	-	Intronic	chr9	42689821	42689878	CBWD7	+	Non-DE	SRR6368572	Deneault et al. - Neuron	KCNQ2
chr9	70199709	70205784	L1PA3:L1:LINE	+	Intronic	chr9	70195030	70195743	CBWD5	-	Non-DE	SRR6368572	Deneault et al. - Neuron	KCNQ2
chr9	70450620	70456693	L1PA3:L1:LINE	+	Intronic	chr9	70457086	70457143	CBWD5	-	Non-DE	SRR6368572	Deneault et al. - Neuron	KCNQ2
chrUn_gl000211	11314	17387	L1PA3:L1:LINE	+	Intergenic	chrUn_gl000211	21804	23742	CR933660	-	Non-DE	SRR6368572	Deneault et al. - Neuron	KCNQ2
chrUn_gl000214	39518	45655	L1PA3:L1:LINE	-	Intergenic	chrUn_gl000214	32576	32635	BC012753	+	Non-DE	SRR6368586	Deneault et al. - Neuron	KCNQ2
chrUn_gl000214	39518	45655	L1PA3:L1:LINE	-	Intergenic	chrUn_gl000214	32576	32635	BC012753	+	Non-DE	SRR6368585	Deneault et al. - Neuron	KCNQ2
chrX	11725368	11731399	L1HS:L1:LINE	+	Intronic	chrX	11682360	11683821	ARHGAP6	-	Non-DE	SRR6368586	Deneault et al. - Neuron	KCNQ2
chrX	11725368	11731399	L1HS:L1:LINE	+	Intronic	chrX	11682360	11683821	ARHGAP6	-	Down-regulated	SRR6368572	Deneault et al. - Neuron	KCNQ2
chrX	11725368	11731399	L1HS:L1:LINE	+	Intronic	chrX	11682360	11683821	ARHGAP6	-	Up-regulated	SRR6368585	Deneault et al. - Neuron	KCNQ2
chrX	11725368	11731399	L1HS:L1:LINE	+	Intronic	chrX	11682360	11683821	ARHGAP6	-	Up-regulated	SRR6368606	Deneault et al. - Neuron	KCNQ2
chrX	18123638	18129028	L1PA2:L1:LINE	+	Intergenic	chrX	18181050	18183343	BEND2	-	Non-DE	SRR6368572	Deneault et al. - Neuron	KCNQ2
chrX	73260445	73266814	L1PA7:L1:LINE	-	Intronic	chrX	73251430	73251675	FTX	-	Non-DE	SRR6368572	Deneault et al. - Neuron	KCNQ2
chrX	73291824	73297937	L1PA8:L1:LINE	-	Intronic	chrX	73251430	73251675	FTX	-	Non-DE	SRR6368606	Deneault et al. - Neuron	KCNQ2
chrX	73291824	73297937	L1PA8:L1:LINE	-	Intronic	chrX	73251430	73251675	FTX	-	Non-DE	SRR6368572	Deneault et al. - Neuron	KCNQ2
chrX	73291824	73297937	L1PA8:L1:LINE	-	Intronic	chrX	73251430	73251675	FTX	-	Non-DE	SRR6368585	Deneault et al. - Neuron	KCNQ2
chrX	125319201	125325235	L1PA2:L1:LINE	-	Intergenic	chrX	125297481	125300080	DCAF12L2	-	Non-DE	SRR6368606	Deneault et al. - Neuron	KCNQ2
chrX	128374838	128380974	L1PA4:L1:LINE	+	Intronic	chrX	128580477	128581278	SMARCA1	-	Non-DE	SRR6368572	Deneault et al. - Neuron	KCNQ2
chrX	130712654	130718709	L1PA2:L1:LINE	+	Intronic	chrX	130678047	130678974	OR13H1	+	Non-DE	SRR6368585	Deneault et al. - Neuron	KCNQ2
chrX	130712654	130718709	L1PA2:L1:LINE	+	Intronic	chrX	130678047	130678974	OR13H1	+	Non-DE	SRR6368572	Deneault et al. - Neuron	KCNQ2
chrX	154583984	154589205	L1PA13:L1:LINE	+	Intergenic	chrX	154581173	154581271	RP13-228J13.1	-	Non-DE	SRR6368586	Deneault et al. - Neuron	KCNQ2
chrY	14959405	14965588	L1PA6:L1:LINE	-	Intronic	chrY	14959163	14959252	USP9Y	+	Non-DE	SRR6368606	Deneault et al. - Neuron	KCNQ2
chr1	143125606	143131754	L1PA2:L1:LINE	-	Intronic	chr1	143119060	143119119	RP11-782C8.1	+	Non-DE	SRR6368608	Deneault et al. - Neuron	SCN2A
chr1	143125606	143131754	L1PA2:L1:LINE	-	Intronic	chr1	143119060	143119119	RP11-782C8.1	+	Non-DE	SRR6368571	Deneault et al. - Neuron	SCN2A
chr11	7679379	7685402	L1PA2:L1:LINE	-	Intergenic	chr11	7686325	7686777	CYB5R2	-	Up-regulated	SRR6368607	Deneault et al. - Neuron	SCN2A
chr11	58638766	58644895	L1PA4:L1:LINE	-	Intronic	chr11	58652423	58652497	AB231721	+	Non-DE	SRR6368571	Deneault et al. - Neuron	SCN2A
chr11	95169380	95175410	L1HS:L1:LINE	+	Intergenic	chr11	95257193	95257298	5S_rRNA	-	Non-DE	SRR6368607	Deneault et al. - Neuron	SCN2A
chr11	96138784	96144829	L1PA2:L1:LINE	-	Intronic	chr11	96123646	96126727	JRKL	+	Down-regulated	SRR6368571	Deneault et al. - Neuron	SCN2A
chr12	5225592	5231594	L1PA2:L1:LINE	-	Intergenic	chr12	5153084	5155954	KCNA5	+	Non-DE	SRR6368607	Deneault et al. - Neuron	SCN2A
chr13	41438707	41444734	L1PA3:L1:LINE	-	Intronic	chr13	41486024	41486859	SUGT1P3	-	Non-DE	SRR6368571	Deneault et al. - Neuron	SCN2A
chr14	71545567	71552023	L1PA7:L1:LINE	-	Intronic	chr14	71542905	71543136	PCNX1	+	Non-DE	SRR6368571	Deneault et al. - Neuron	SCN2A
chr15	28399917	28406027	L1PA5:L1:LINE	-	Intronic	chr15	28397822	28397976	HERC2	-	Up-regulated	SRR6368571	Deneault et al. - Neuron	SCN2A
chr15	56426816	56432826	L1PA2:L1:LINE	-	Intronic	chr15	56434975	56435098	RFX7	-	Non-DE	SRR6368571	Deneault et al. - Neuron	SCN2A
chr15	63909208	63914241	L1PA4:L1:LINE	-	Intronic	chr15	63908628	63908881	HERC1	-	Non-DE	SRR6368571	Deneault et al. - Neuron	SCN2A
chr15	63909208	63914241	L1PA4:L1:LINE	-	Intronic	chr15	63908628	63908881	HERC1	-	Non-DE	SRR6368607	Deneault et al. - Neuron	SCN2A
chr15	82090271	82096304	L1PA2:L1:LINE	+	Intronic	chr15	82334118	82336954	MEX3B	-	Non-DE	SRR6368609	Deneault et al. - Neuron	SCN2A
chr15	82090271	82096304	L1PA2:L1:LINE	+	Intronic	chr15	82334118	82336954	MEX3B	-	Non-DE	SRR6368607	Deneault et al. - Neuron	SCN2A
chr15	82090271	82096304	L1PA2:L1:LINE	+	Intronic	chr15	82334118	82336954	MEX3B	-	Non-DE	SRR6368571	Deneault et al. - Neuron	SCN2A
chr15	82287507	82293537	L1PA2:L1:LINE	+	Intronic	chr15	82334118	82336954	MEX3B	-	Non-DE	SRR6368571	Deneault et al. - Neuron	SCN2A
chr16	18832575	18838378	L1HS:L1:LINE	-	Intronic	chr16	18839352	18839490	SMG1	-	Non-DE	SRR6368607	Deneault et al. - Neuron	SCN2A
chr16	18832575	18838378	L1HS:L1:LINE	-	Intronic	chr16	18839352	18839490	SMG1	-	Non-DE	SRR6368571	Deneault et al. - Neuron	SCN2A
chr16	82172856	82178863	L1PA2:L1:LINE	+	Intronic	chr16	82181766	82182468	MPHOSPH6	-	Non-DE	SRR6368571	Deneault et al. - Neuron	SCN2A
chr18	53382715	53388760	L1PA2:L1:LINE	-	Intronic	chr18	53443957	53447261	LINC01415	-	Non-DE	SRR6368608	Deneault et al. - Neuron	SCN2A
chr18	53382715	53388760	L1PA2:L1:LINE	-	Intronic	chr18	53443957	53447261	LINC01415	-	Non-DE	SRR6368607	Deneault et al. - Neuron	SCN2A
chr20	44100759	44107254	L1PA13:L1:LINE	-	Intronic	chr20	44108581	44108734	WFDC2	+	Non-DE	SRR6368607	Deneault et al. - Neuron	SCN2A
chr20	52072101	52078105	L1PA3:L1:LINE	-	Intronic	chr20	52103682	52111869	TSHZ2	+	Non-DE	SRR6368607	Deneault et al. - Neuron	SCN2A
chr20	52120390	52126413	L1PA2:L1:LINE	+	Exonic	chr20	52120647	52120860	RP4-669H2.1	-	Non-DE	SRR6368607	Deneault et al. - Neuron	SCN2A
chr3	27857474	27863474	L1PA7:L1:LINE	-	Intronic	chr3	27872378	27875073	LINC01981	-	Non-DE	SRR6368571	Deneault et al. - Neuron	SCN2A
chr3	43607314	43613339	L1PA2:L1:LINE	+	Exonic	chr3	43607144	43607219	ANO10	-	Non-DE	SRR6368607	Deneault et al. - Neuron	SCN2A
chr3	58827880	58833905	L1PA2:L1:LINE	+	Intronic	chr3	58817411	58817615	CFAP20DC	-	Non-DE	SRR6368608	Deneault et al. - Neuron	SCN2A
chr3	58827880	58833905	L1PA2:L1:LINE	+	Intronic	chr3	58817411	58817615	CFAP20DC	-	Non-DE	SRR6368607	Deneault et al. - Neuron	SCN2A
chr3	58827880	58833905	L1PA2:L1:LINE	+	Intronic	chr3	58817411	58817615	CFAP20DC	-	Non-DE	SRR6368571	Deneault et al. - Neuron	SCN2A
chr3	154951845	154958485	L1PA15:L1:LINE	-	Intergenic	chr3	154958733	154959414	LINC01487	+	Non-DE	SRR6368608	Deneault et al. - Neuron	SCN2A
chr4	20740248	20746401	L1PA5:L1:LINE	+	Intronic	chr4	20736250	20736358	KCNIP4	-	Non-DE	SRR6368571	Deneault et al. - Neuron	SCN2A
chr4	21771611	21778019	L1PA8A:L1:LINE	-	Intronic	chr4	21844963	21854811	KCNIP4-IT1	-	Non-DE	SRR6368607	Deneault et al. - Neuron	SCN2A
chr4	42043774	42050256	L1PA7:L1:LINE	+	Intronic	chr4	42051393	42051496	SLC30A9	+	Non-DE	SRR6368607	Deneault et al. - Neuron	SCN2A
chr4	62609439	62615587	L1PA3:L1:LINE	+	Intronic	chr4	62598471	62599272	ADGRL3	+	Non-DE	SRR6368571	Deneault et al. - Neuron	SCN2A
chr4	62609439	62615587	L1PA3:L1:LINE	+	Intronic	chr4	62598471	62599272	ADGRL3	+	Non-DE	SRR6368607	Deneault et al. - Neuron	SCN2A
chr4	62620336	62626523	L1PA4:L1:LINE	-	Intronic	chr4	62598471	62599272	ADGRL3	+	Non-DE	SRR6368607	Deneault et al. - Neuron	SCN2A
chr4	69285971	69292051	L1PA6:L1:LINE	+	Intergenic	chr4	69313166	69313241	TMPRSS11E	+	Non-DE	SRR6368607	Deneault et al. - Neuron	SCN2A
chr4	91596877	91602908	L1HS:L1:LINE	-	Intronic	chr4	91645064	91645142	CCSER1	+	Non-DE	SRR6368607	Deneault et al. - Neuron	SCN2A
chr5	74002130	74008268	L1PA3:L1:LINE	+	Intronic	chr5	74001043	74001145	HEXB	+	Up-regulated	SRR6368607	Deneault et al. - Neuron	SCN2A
chr5	74002130	74008268	L1PA3:L1:LINE	+	Intronic	chr5	74001043	74001145	HEXB	+	Non-DE	SRR6368609	Deneault et al. - Neuron	SCN2A
chr5	74002130	74008268	L1PA3:L1:LINE	+	Intronic	chr5	74001043	74001145	HEXB	+	Non-DE	SRR6368571	Deneault et al. - Neuron	SCN2A
chr5	82753618	82759636	L1PA2:L1:LINE	-	Intergenic	chr5	82767492	82767842	VCAN	+	Non-DE	SRR6368607	Deneault et al. - Neuron	SCN2A
chr6	116959859	116965997	L1PA3:L1:LINE	+	Intronic	chr6	116966876	116967097	ZUP1	-	Non-DE	SRR6368607	Deneault et al. - Neuron	SCN2A
chr7	12536837	12542864	L1PA3:L1:LINE	+	Intronic	chr7	12596186	12596356	BC075797	+	Non-DE	SRR6368607	Deneault et al. - Neuron	SCN2A
chr7	91813070	91819192	L1PA3:L1:LINE	-	Intronic	chr7	91808164	91809228	CYP51A1-AS1	+	Non-DE	SRR6368571	Deneault et al. - Neuron	SCN2A
chr9	42690271	42696344	L1PA3:L1:LINE	-	Intronic	chr9	42689821	42689878	CBWD7	+	Non-DE	SRR6368608	Deneault et al. - Neuron	SCN2A
chr9	42690271	42696344	L1PA3:L1:LINE	-	Intronic	chr9	42689821	42689878	CBWD7	+	Non-DE	SRR6368571	Deneault et al. - Neuron	SCN2A
chr9	70199709	70205784	L1PA3:L1:LINE	+	Intronic	chr9	70195030	70195743	CBWD5	-	Non-DE	SRR6368571	Deneault et al. - Neuron	SCN2A
chr9	70450620	70456693	L1PA3:L1:LINE	+	Intronic	chr9	70457086	70457143	CBWD5	-	Non-DE	SRR6368608	Deneault et al. - Neuron	SCN2A
chr9	70450620	70456693	L1PA3:L1:LINE	+	Intronic	chr9	70457086	70457143	CBWD5	-	Non-DE	SRR6368571	Deneault et al. - Neuron	SCN2A
chrUn_gl000211	11314	17387	L1PA3:L1:LINE	+	Intergenic	chrUn_gl000211	21804	23742	CR933660	-	Non-DE	SRR6368571	Deneault et al. - Neuron	SCN2A
chrUn_gl000214	39518	45655	L1PA3:L1:LINE	-	Intergenic	chrUn_gl000214	32576	32635	BC012753	+	Non-DE	SRR6368608	Deneault et al. - Neuron	SCN2A
chrUn_gl000214	39518	45655	L1PA3:L1:LINE	-	Intergenic	chrUn_gl000214	32576	32635	BC012753	+	Non-DE	SRR6368571	Deneault et al. - Neuron	SCN2A
chrX	11725368	11731399	L1HS:L1:LINE	+	Intronic	chrX	11682360	11683821	ARHGAP6	-	Up-regulated	SRR6368607	Deneault et al. - Neuron	SCN2A
chrX	73260445	73266814	L1PA7:L1:LINE	-	Intronic	chrX	73251430	73251675	FTX	-	Non-DE	SRR6368607	Deneault et al. - Neuron	SCN2A
chrX	73291824	73297937	L1PA8:L1:LINE	-	Intronic	chrX	73251430	73251675	FTX	-	Non-DE	SRR6368571	Deneault et al. - Neuron	SCN2A
chrX	73291824	73297937	L1PA8:L1:LINE	-	Intronic	chrX	73251430	73251675	FTX	-	Non-DE	SRR6368607	Deneault et al. - Neuron	SCN2A
chrX	130712654	130718709	L1PA2:L1:LINE	+	Intronic	chrX	130678047	130678974	OR13H1	+	Non-DE	SRR6368607	Deneault et al. - Neuron	SCN2A
chr1	92853959	92860042	L1PA7:L1:LINE	+	Intronic	chr1	92852567	92853732	RPAP2	+	Up-regulated	SRR6368588	Deneault et al. - Neuron	TENM1
chr1	92853959	92860042	L1PA7:L1:LINE	+	Intronic	chr1	92852567	92853732	RPAP2	+	Up-regulated	SRR6368587	Deneault et al. - Neuron	TENM1
chr1	119563254	119569271	L1PA3:L1:LINE	+	Intergenic	chr1	119573838	119575982	WARS2	-	Up-regulated	SRR6368579	Deneault et al. - Neuron	TENM1
chr1	119563254	119569271	L1PA3:L1:LINE	+	Intergenic	chr1	119573838	119575982	WARS2	-	Up-regulated	SRR6368588	Deneault et al. - Neuron	TENM1
chr1	121316087	121322219	L1PA3:L1:LINE	+	Intronic	chr1	121310573	121313686	EMBP1	+	Non-DE	SRR6368579	Deneault et al. - Neuron	TENM1
chr1	143125606	143131754	L1PA2:L1:LINE	-	Intronic	chr1	143119060	143119119	RP11-782C8.1	+	Non-DE	SRR6368588	Deneault et al. - Neuron	TENM1
chr1	143125606	143131754	L1PA2:L1:LINE	-	Intronic	chr1	143119060	143119119	RP11-782C8.1	+	Non-DE	SRR6368587	Deneault et al. - Neuron	TENM1
chr1	143125606	143131754	L1PA2:L1:LINE	-	Intronic	chr1	143119060	143119119	RP11-782C8.1	+	Non-DE	SRR6368579	Deneault et al. - Neuron	TENM1
chr1	149923964	149930070	L1PA5:L1:LINE	-	Intronic	chr1	149931602	149931715	OTUD7B	-	Up-regulated	SRR6368588	Deneault et al. - Neuron	TENM1
chr1	149923964	149930070	L1PA5:L1:LINE	-	Intronic	chr1	149931602	149931715	OTUD7B	-	Non-DE	SRR6368587	Deneault et al. - Neuron	TENM1
chr1	171519607	171525696	L1PA6:L1:LINE	-	Intronic	chr1	171519224	171519379	PRRC2C	+	Up-regulated	SRR6368588	Deneault et al. - Neuron	TENM1
chr1	171519607	171525696	L1PA6:L1:LINE	-	Intronic	chr1	171519224	171519379	PRRC2C	+	Up-regulated	SRR6368587	Deneault et al. - Neuron	TENM1
chr1	172560414	172566554	L1PA5:L1:LINE	-	Intronic	chr1	172560123	172560211	SUCO	+	Up-regulated	SRR6368588	Deneault et al. - Neuron	TENM1
chr1	220814954	220821404	L1PA10:L1:LINE	+	Intronic	chr1	220823961	220824062	MARK1	+	Non-DE	SRR6368588	Deneault et al. - Neuron	TENM1
chr1	220814954	220821404	L1PA10:L1:LINE	+	Intronic	chr1	220823961	220824062	MARK1	+	Non-DE	SRR6368587	Deneault et al. - Neuron	TENM1
chr10	55253766	55259783	L1PA3:L1:LINE	-	Intergenic	chr10	55580859	55583118	PCDH15	-	Non-DE	SRR6368579	Deneault et al. - Neuron	TENM1
chr10	55253766	55259783	L1PA3:L1:LINE	-	Intergenic	chr10	55580859	55583118	PCDH15	-	Non-DE	SRR6368588	Deneault et al. - Neuron	TENM1
chr10	96865055	96871181	L1PA6:L1:LINE	-	Intronic	chr10	96828991	96829254	CYP2C8	-	Non-DE	SRR6368579	Deneault et al. - Neuron	TENM1
chr10	101400324	101406444	L1PA5:L1:LINE	-	Intergenic	chr10	101419262	101419345	ENTPD7	+	Up-regulated	SRR6368579	Deneault et al. - Neuron	TENM1
chr11	2655404	2661585	L1PA5:L1:LINE	-	Exonic	chr11	2629557	2721228	KCNQ1OT1	-	Non-DE	SRR6368587	Deneault et al. - Neuron	TENM1
chr11	7679379	7685402	L1PA2:L1:LINE	-	Intergenic	chr11	7686325	7686777	CYB5R2	-	Up-regulated	SRR6368588	Deneault et al. - Neuron	TENM1
chr11	7679379	7685402	L1PA2:L1:LINE	-	Intergenic	chr11	7686325	7686777	CYB5R2	-	Up-regulated	SRR6368587	Deneault et al. - Neuron	TENM1
chr11	11906779	11912696	L1PA10:L1:LINE	+	Intronic	chr11	11906013	11906127	USP47	+	Non-DE	SRR6368588	Deneault et al. - Neuron	TENM1
chr11	11906779	11912696	L1PA10:L1:LINE	+	Intronic	chr11	11906013	11906127	USP47	+	Non-DE	SRR6368611	Deneault et al. - Neuron	TENM1
chr11	14616306	14622422	L1PA6:L1:LINE	-	Intronic	chr11	14665268	14666599	PDE3B	+	Non-DE	SRR6368579	Deneault et al. - Neuron	TENM1
chr11	58638766	58644895	L1PA4:L1:LINE	-	Intronic	chr11	58652423	58652497	AB231721	+	Non-DE	SRR6368587	Deneault et al. - Neuron	TENM1
chr11	58638766	58644895	L1PA4:L1:LINE	-	Intronic	chr11	58652423	58652497	AB231721	+	Non-DE	SRR6368579	Deneault et al. - Neuron	TENM1
chr11	95169380	95175410	L1HS:L1:LINE	+	Intergenic	chr11	95257193	95257298	5S_rRNA	-	Non-DE	SRR6368610	Deneault et al. - Neuron	TENM1
chr11	95169380	95175410	L1HS:L1:LINE	+	Intergenic	chr11	95257193	95257298	5S_rRNA	-	Non-DE	SRR6368611	Deneault et al. - Neuron	TENM1
chr11	95169380	95175410	L1HS:L1:LINE	+	Intergenic	chr11	95257193	95257298	5S_rRNA	-	Non-DE	SRR6368587	Deneault et al. - Neuron	TENM1
chr11	95169380	95175410	L1HS:L1:LINE	+	Intergenic	chr11	95257193	95257298	5S_rRNA	-	Non-DE	SRR6368579	Deneault et al. - Neuron	TENM1
chr11	96138784	96144829	L1PA2:L1:LINE	-	Intronic	chr11	96123646	96126727	JRKL	+	Non-DE	SRR6368610	Deneault et al. - Neuron	TENM1
chr11	113094669	113100816	L1PA5:L1:LINE	+	Intronic	chr11	113101917	113101995	NCAM1	+	Non-DE	SRR6368587	Deneault et al. - Neuron	TENM1
chr12	4618061	4624067	L1PA2:L1:LINE	+	Intronic	chr12	4626226	4626355	C12orf4	-	Non-DE	SRR6368587	Deneault et al. - Neuron	TENM1
chr12	4618061	4624067	L1PA2:L1:LINE	+	Intronic	chr12	4626226	4626355	C12orf4	-	Non-DE	SRR6368588	Deneault et al. - Neuron	TENM1
chr12	4618061	4624067	L1PA2:L1:LINE	+	Intronic	chr12	4626226	4626355	C12orf4	-	Non-DE	SRR6368611	Deneault et al. - Neuron	TENM1
chr12	5225592	5231594	L1PA2:L1:LINE	-	Intergenic	chr12	5153084	5155954	KCNA5	+	Non-DE	SRR6368588	Deneault et al. - Neuron	TENM1
chr12	5225592	5231594	L1PA2:L1:LINE	-	Intergenic	chr12	5153084	5155954	KCNA5	+	Non-DE	SRR6368579	Deneault et al. - Neuron	TENM1
chr12	5225592	5231594	L1PA2:L1:LINE	-	Intergenic	chr12	5153084	5155954	KCNA5	+	Non-DE	SRR6368587	Deneault et al. - Neuron	TENM1
chr12	5225592	5231594	L1PA2:L1:LINE	-	Intergenic	chr12	5153084	5155954	KCNA5	+	Up-regulated	SRR6368611	Deneault et al. - Neuron	TENM1
chr12	48068016	48073191	L1PA6:L1:LINE	+	Exonic	chr12	48073275	48073377	RPAP3	-	Non-DE	SRR6368587	Deneault et al. - Neuron	TENM1
chr12	48068016	48073191	L1PA6:L1:LINE	+	Exonic	chr12	48073275	48073377	RPAP3	-	Non-DE	SRR6368610	Deneault et al. - Neuron	TENM1
chr12	79433401	79439425	L1PA2:L1:LINE	-	Exonic	chr12	79439432	79439606	SYT1	+	Non-DE	SRR6368587	Deneault et al. - Neuron	TENM1
chr12	79433401	79439425	L1PA2:L1:LINE	-	Exonic	chr12	79439432	79439606	SYT1	+	Non-DE	SRR6368611	Deneault et al. - Neuron	TENM1
chr12	79433401	79439425	L1PA2:L1:LINE	-	Exonic	chr12	79439432	79439606	SYT1	+	Non-DE	SRR6368610	Deneault et al. - Neuron	TENM1
chr12	79433401	79439425	L1PA2:L1:LINE	-	Exonic	chr12	79439432	79439606	SYT1	+	Non-DE	SRR6368588	Deneault et al. - Neuron	TENM1
chr12	79433401	79439425	L1PA2:L1:LINE	-	Exonic	chr12	79439432	79439606	SYT1	+	Non-DE	SRR6368579	Deneault et al. - Neuron	TENM1
chr12	105401334	105407760	L1PA7:L1:LINE	-	Intronic	chr12	105413561	105418257	ALDH1L2	-	Non-DE	SRR6368579	Deneault et al. - Neuron	TENM1
chr13	41438707	41444734	L1PA3:L1:LINE	-	Intronic	chr13	41486024	41486859	SUGT1P3	-	Non-DE	SRR6368579	Deneault et al. - Neuron	TENM1
chr14	55414793	55420840	L1PA5:L1:LINE	+	Intronic	chr14	55422278	55422412	WDHD1	-	Non-DE	SRR6368610	Deneault et al. - Neuron	TENM1
chr14	55414793	55420840	L1PA5:L1:LINE	+	Intronic	chr14	55422278	55422412	WDHD1	-	Up-regulated	SRR6368588	Deneault et al. - Neuron	TENM1
chr15	56426816	56432826	L1PA2:L1:LINE	-	Intronic	chr15	56434975	56435098	RFX7	-	Non-DE	SRR6368587	Deneault et al. - Neuron	TENM1
chr15	56426816	56432826	L1PA2:L1:LINE	-	Intronic	chr15	56434975	56435098	RFX7	-	Non-DE	SRR6368579	Deneault et al. - Neuron	TENM1
chr15	63909208	63914241	L1PA4:L1:LINE	-	Intronic	chr15	63908628	63908881	HERC1	-	Non-DE	SRR6368587	Deneault et al. - Neuron	TENM1
chr15	82090271	82096304	L1PA2:L1:LINE	+	Intronic	chr15	82334118	82336954	MEX3B	-	Non-DE	SRR6368610	Deneault et al. - Neuron	TENM1
chr15	82090271	82096304	L1PA2:L1:LINE	+	Intronic	chr15	82334118	82336954	MEX3B	-	Non-DE	SRR6368579	Deneault et al. - Neuron	TENM1
chr15	82090271	82096304	L1PA2:L1:LINE	+	Intronic	chr15	82334118	82336954	MEX3B	-	Non-DE	SRR6368611	Deneault et al. - Neuron	TENM1
chr15	82090271	82096304	L1PA2:L1:LINE	+	Intronic	chr15	82334118	82336954	MEX3B	-	Non-DE	SRR6368587	Deneault et al. - Neuron	TENM1
chr15	82163008	82169040	L1PA2:L1:LINE	+	Intronic	chr15	82334118	82336954	MEX3B	-	Non-DE	SRR6368588	Deneault et al. - Neuron	TENM1
chr15	82163008	82169040	L1PA2:L1:LINE	+	Intronic	chr15	82334118	82336954	MEX3B	-	Non-DE	SRR6368587	Deneault et al. - Neuron	TENM1
chr15	82287507	82293537	L1PA2:L1:LINE	+	Intronic	chr15	82334118	82336954	MEX3B	-	Non-DE	SRR6368587	Deneault et al. - Neuron	TENM1
chr15	82287507	82293537	L1PA2:L1:LINE	+	Intronic	chr15	82334118	82336954	MEX3B	-	Non-DE	SRR6368579	Deneault et al. - Neuron	TENM1
chr15	82287507	82293537	L1PA2:L1:LINE	+	Intronic	chr15	82334118	82336954	MEX3B	-	Non-DE	SRR6368610	Deneault et al. - Neuron	TENM1
chr15	90177549	90183532	L1PA3:L1:LINE	+	Intronic	chr15	90176916	90177114	KIF7	-	Up-regulated	SRR6368588	Deneault et al. - Neuron	TENM1
chr15	97975923	97982079	L1PA3:L1:LINE	+	Intronic	chr15	97896726	97897019	RN7SL677P	+	Non-DE	SRR6368611	Deneault et al. - Neuron	TENM1
chr15	97975923	97982079	L1PA3:L1:LINE	+	Intronic	chr15	97896726	97897019	RN7SL677P	+	Non-DE	SRR6368610	Deneault et al. - Neuron	TENM1
chr15	97975923	97982079	L1PA3:L1:LINE	+	Intronic	chr15	97896726	97897019	RN7SL677P	+	Non-DE	SRR6368579	Deneault et al. - Neuron	TENM1
chr15	97975923	97982079	L1PA3:L1:LINE	+	Intronic	chr15	97896726	97897019	RN7SL677P	+	Non-DE	SRR6368587	Deneault et al. - Neuron	TENM1
chr15	97975923	97982079	L1PA3:L1:LINE	+	Intronic	chr15	97896726	97897019	RN7SL677P	+	Non-DE	SRR6368588	Deneault et al. - Neuron	TENM1
chr16	18832575	18838378	L1HS:L1:LINE	-	Intronic	chr16	18839352	18839490	SMG1	-	Up-regulated	SRR6368587	Deneault et al. - Neuron	TENM1
chr16	18832575	18838378	L1HS:L1:LINE	-	Intronic	chr16	18839352	18839490	SMG1	-	Up-regulated	SRR6368588	Deneault et al. - Neuron	TENM1
chr16	18832575	18838378	L1HS:L1:LINE	-	Intronic	chr16	18839352	18839490	SMG1	-	Non-DE	SRR6368610	Deneault et al. - Neuron	TENM1
chr16	18832575	18838378	L1HS:L1:LINE	-	Intronic	chr16	18839352	18839490	SMG1	-	Non-DE	SRR6368611	Deneault et al. - Neuron	TENM1
chr16	18832575	18838378	L1HS:L1:LINE	-	Intronic	chr16	18839352	18839490	SMG1	-	Up-regulated	SRR6368579	Deneault et al. - Neuron	TENM1
chr16	82172856	82178863	L1PA2:L1:LINE	+	Intronic	chr16	82181766	82182468	MPHOSPH6	-	Non-DE	SRR6368579	Deneault et al. - Neuron	TENM1
chr17	58958801	58964835	L1PA2:L1:LINE	-	Intronic	chr17	58967055	58967132	BCAS3	+	Non-DE	SRR6368587	Deneault et al. - Neuron	TENM1
chr18	53382715	53388760	L1PA2:L1:LINE	-	Intronic	chr18	53443957	53447261	LINC01415	-	Non-DE	SRR6368610	Deneault et al. - Neuron	TENM1
chr18	53382715	53388760	L1PA2:L1:LINE	-	Intronic	chr18	53443957	53447261	LINC01415	-	Non-DE	SRR6368611	Deneault et al. - Neuron	TENM1
chr18	53382715	53388760	L1PA2:L1:LINE	-	Intronic	chr18	53443957	53447261	LINC01415	-	Non-DE	SRR6368579	Deneault et al. - Neuron	TENM1
chr18	53382715	53388760	L1PA2:L1:LINE	-	Intronic	chr18	53443957	53447261	LINC01415	-	Non-DE	SRR6368588	Deneault et al. - Neuron	TENM1
chr18	53382715	53388760	L1PA2:L1:LINE	-	Intronic	chr18	53443957	53447261	LINC01415	-	Non-DE	SRR6368587	Deneault et al. - Neuron	TENM1
chr18	75289711	75295821	L1PA6:L1:LINE	+	Intergenic	chr18	74980540	74982096	GALR1	+	Non-DE	SRR6368579	Deneault et al. - Neuron	TENM1
chr18	75289711	75295821	L1PA6:L1:LINE	+	Intergenic	chr18	74980540	74982096	GALR1	+	Non-DE	SRR6368587	Deneault et al. - Neuron	TENM1
chr18	75289711	75295821	L1PA6:L1:LINE	+	Intergenic	chr18	74980540	74982096	GALR1	+	Non-DE	SRR6368588	Deneault et al. - Neuron	TENM1
chr19	12017069	12022645	L1PA5:L1:LINE	+	Intronic	chr19	12015463	12015702	ZNF69	+	Up-regulated	SRR6368587	Deneault et al. - Neuron	TENM1
chr19	12017069	12022645	L1PA5:L1:LINE	+	Intronic	chr19	12015463	12015702	ZNF69	+	Up-regulated	SRR6368579	Deneault et al. - Neuron	TENM1
chr19	12017069	12022645	L1PA5:L1:LINE	+	Intronic	chr19	12015463	12015702	ZNF69	+	Up-regulated	SRR6368588	Deneault et al. - Neuron	TENM1
chr19	20990530	20996633	L1PA3:L1:LINE	+	Intronic	chr19	20976588	20977403	ZNF66	+	Up-regulated	SRR6368588	Deneault et al. - Neuron	TENM1
chr19	20990530	20996633	L1PA3:L1:LINE	+	Intronic	chr19	20976588	20977403	ZNF66	+	Up-regulated	SRR6368587	Deneault et al. - Neuron	TENM1
chr19	28186346	28192495	L1PA4:L1:LINE	-	Intronic	chr19	28221180	28223355	LINC00662	-	Non-DE	SRR6368588	Deneault et al. - Neuron	TENM1
chr19	28186346	28192495	L1PA4:L1:LINE	-	Intronic	chr19	28221180	28223355	LINC00662	-	Non-DE	SRR6368610	Deneault et al. - Neuron	TENM1
chr19	40543822	40549961	L1PA4:L1:LINE	-	Intronic	chr19	40534166	40542533	ZNF780B	-	Non-DE	SRR6368588	Deneault et al. - Neuron	TENM1
chr19	40543822	40549961	L1PA4:L1:LINE	-	Intronic	chr19	40534166	40542533	ZNF780B	-	Up-regulated	SRR6368587	Deneault et al. - Neuron	TENM1
chr2	71638604	71644631	L1HS:L1:LINE	-	Intronic	chr2	71645731	71645769	ZNF638	+	Up-regulated	SRR6368587	Deneault et al. - Neuron	TENM1
chr2	118380829	118386852	L1PA3:L1:LINE	+	Intergenic	chr2	118572254	118572438	DDX18	+	Non-DE	SRR6368611	Deneault et al. - Neuron	TENM1
chr2	118681259	118686848	L1PA4:L1:LINE	+	Intronic	chr2	118688612	118688726	CCDC93	-	Up-regulated	SRR6368587	Deneault et al. - Neuron	TENM1
chr2	118681259	118686848	L1PA4:L1:LINE	+	Intronic	chr2	118688612	118688726	CCDC93	-	Non-DE	SRR6368611	Deneault et al. - Neuron	TENM1
chr2	170105133	170111166	L1HS:L1:LINE	+	Intronic	chr2	170103887	170104025	LRP2	-	Non-DE	SRR6368587	Deneault et al. - Neuron	TENM1
chr2	170105133	170111166	L1HS:L1:LINE	+	Intronic	chr2	170103887	170104025	LRP2	-	Up-regulated	SRR6368588	Deneault et al. - Neuron	TENM1
chr2	170105133	170111166	L1HS:L1:LINE	+	Intronic	chr2	170103887	170104025	LRP2	-	Non-DE	SRR6368579	Deneault et al. - Neuron	TENM1
chr20	44100759	44107254	L1PA13:L1:LINE	-	Intronic	chr20	44108581	44108734	WFDC2	+	Non-DE	SRR6368610	Deneault et al. - Neuron	TENM1
chr20	52072101	52078105	L1PA3:L1:LINE	-	Intronic	chr20	52103682	52111869	TSHZ2	+	Non-DE	SRR6368587	Deneault et al. - Neuron	TENM1
chr20	52072101	52078105	L1PA3:L1:LINE	-	Intronic	chr20	52103682	52111869	TSHZ2	+	Non-DE	SRR6368588	Deneault et al. - Neuron	TENM1
chr20	52072101	52078105	L1PA3:L1:LINE	-	Intronic	chr20	52103682	52111869	TSHZ2	+	Non-DE	SRR6368610	Deneault et al. - Neuron	TENM1
chr20	52072101	52078105	L1PA3:L1:LINE	-	Intronic	chr20	52103682	52111869	TSHZ2	+	Non-DE	SRR6368579	Deneault et al. - Neuron	TENM1
chr20	52120390	52126413	L1PA2:L1:LINE	+	Exonic	chr20	52120647	52120860	RP4-669H2.1	-	Non-DE	SRR6368579	Deneault et al. - Neuron	TENM1
chr22	22631182	22637196	L1PA3:L1:LINE	-	Intergenic	chr22	22652522	22652576	CH17-264L24.2	+	Non-DE	SRR6368587	Deneault et al. - Neuron	TENM1
chr22	22631182	22637196	L1PA3:L1:LINE	-	Intergenic	chr22	22652522	22652576	CH17-264L24.2	+	Non-DE	SRR6368588	Deneault et al. - Neuron	TENM1
chr3	15433014	15439121	L1PA4:L1:LINE	-	Intronic	chr3	15451376	15452944	METTL6	-	Non-DE	SRR6368587	Deneault et al. - Neuron	TENM1
chr3	27857474	27863474	L1PA7:L1:LINE	-	Intronic	chr3	27872378	27875073	LINC01981	-	Non-DE	SRR6368587	Deneault et al. - Neuron	TENM1
chr3	27857474	27863474	L1PA7:L1:LINE	-	Intronic	chr3	27872378	27875073	LINC01981	-	Non-DE	SRR6368579	Deneault et al. - Neuron	TENM1
chr3	27857474	27863474	L1PA7:L1:LINE	-	Intronic	chr3	27872378	27875073	LINC01981	-	Non-DE	SRR6368610	Deneault et al. - Neuron	TENM1
chr3	27857474	27863474	L1PA7:L1:LINE	-	Intronic	chr3	27872378	27875073	LINC01981	-	Non-DE	SRR6368611	Deneault et al. - Neuron	TENM1
chr3	27857474	27863474	L1PA7:L1:LINE	-	Intronic	chr3	27872378	27875073	LINC01981	-	Non-DE	SRR6368588	Deneault et al. - Neuron	TENM1
chr3	43607314	43613339	L1PA2:L1:LINE	+	Exonic	chr3	43607144	43607219	ANO10	-	Up-regulated	SRR6368610	Deneault et al. - Neuron	TENM1
chr3	43607314	43613339	L1PA2:L1:LINE	+	Exonic	chr3	43607144	43607219	ANO10	-	Non-DE	SRR6368579	Deneault et al. - Neuron	TENM1
chr3	43607314	43613339	L1PA2:L1:LINE	+	Exonic	chr3	43607144	43607219	ANO10	-	Non-DE	SRR6368587	Deneault et al. - Neuron	TENM1
chr3	51681874	51687951	L1PA6:L1:LINE	+	Intronic	chr3	51680300	51680497	RAD54L2	+	Up-regulated	SRR6368587	Deneault et al. - Neuron	TENM1
chr3	58827880	58833905	L1PA2:L1:LINE	+	Intronic	chr3	58817411	58817615	CFAP20DC	-	Non-DE	SRR6368587	Deneault et al. - Neuron	TENM1
chr3	58827880	58833905	L1PA2:L1:LINE	+	Intronic	chr3	58817411	58817615	CFAP20DC	-	Non-DE	SRR6368588	Deneault et al. - Neuron	TENM1
chr3	58827880	58833905	L1PA2:L1:LINE	+	Intronic	chr3	58817411	58817615	CFAP20DC	-	Non-DE	SRR6368579	Deneault et al. - Neuron	TENM1
chr3	58827880	58833905	L1PA2:L1:LINE	+	Intronic	chr3	58817411	58817615	CFAP20DC	-	Non-DE	SRR6368610	Deneault et al. - Neuron	TENM1
chr3	58827880	58833905	L1PA2:L1:LINE	+	Intronic	chr3	58817411	58817615	CFAP20DC	-	Non-DE	SRR6368611	Deneault et al. - Neuron	TENM1
chr3	154951845	154958485	L1PA15:L1:LINE	-	Intergenic	chr3	154958733	154959414	LINC01487	+	Non-DE	SRR6368579	Deneault et al. - Neuron	TENM1
chr3	154951845	154958485	L1PA15:L1:LINE	-	Intergenic	chr3	154958733	154959414	LINC01487	+	Non-DE	SRR6368587	Deneault et al. - Neuron	TENM1
chr3	154951845	154958485	L1PA15:L1:LINE	-	Intergenic	chr3	154958733	154959414	LINC01487	+	Non-DE	SRR6368588	Deneault et al. - Neuron	TENM1
chr3	154951845	154958485	L1PA15:L1:LINE	-	Intergenic	chr3	154958733	154959414	LINC01487	+	Non-DE	SRR6368611	Deneault et al. - Neuron	TENM1
chr4	20740248	20746401	L1PA5:L1:LINE	+	Intronic	chr4	20736250	20736358	KCNIP4	-	Non-DE	SRR6368579	Deneault et al. - Neuron	TENM1
chr4	20740248	20746401	L1PA5:L1:LINE	+	Intronic	chr4	20736250	20736358	KCNIP4	-	Non-DE	SRR6368588	Deneault et al. - Neuron	TENM1
chr4	20740248	20746401	L1PA5:L1:LINE	+	Intronic	chr4	20736250	20736358	KCNIP4	-	Non-DE	SRR6368587	Deneault et al. - Neuron	TENM1
chr4	62609439	62615587	L1PA3:L1:LINE	+	Intronic	chr4	62598471	62599272	ADGRL3	+	Non-DE	SRR6368587	Deneault et al. - Neuron	TENM1
chr4	62620336	62626523	L1PA4:L1:LINE	-	Intronic	chr4	62598471	62599272	ADGRL3	+	Non-DE	SRR6368610	Deneault et al. - Neuron	TENM1
chr4	62620336	62626523	L1PA4:L1:LINE	-	Intronic	chr4	62598471	62599272	ADGRL3	+	Non-DE	SRR6368588	Deneault et al. - Neuron	TENM1
chr4	62620336	62626523	L1PA4:L1:LINE	-	Intronic	chr4	62598471	62599272	ADGRL3	+	Non-DE	SRR6368587	Deneault et al. - Neuron	TENM1
chr4	71919553	71925574	L1PA3:L1:LINE	-	Intergenic	chr4	71895068	71896629	DCK	+	Non-DE	SRR6368611	Deneault et al. - Neuron	TENM1
chr4	71919553	71925574	L1PA3:L1:LINE	-	Intergenic	chr4	71895068	71896629	DCK	+	Non-DE	SRR6368610	Deneault et al. - Neuron	TENM1
chr4	71919553	71925574	L1PA3:L1:LINE	-	Intergenic	chr4	71895068	71896629	DCK	+	Non-DE	SRR6368587	Deneault et al. - Neuron	TENM1
chr4	71919553	71925574	L1PA3:L1:LINE	-	Intergenic	chr4	71895068	71896629	DCK	+	Non-DE	SRR6368588	Deneault et al. - Neuron	TENM1
chr4	71919553	71925574	L1PA3:L1:LINE	-	Intergenic	chr4	71895068	71896629	DCK	+	Non-DE	SRR6368579	Deneault et al. - Neuron	TENM1
chr4	87645970	87652087	L1PA6:L1:LINE	-	Intronic	chr4	87653552	87653627	PTPN13	+	Up-regulated	SRR6368588	Deneault et al. - Neuron	TENM1
chr4	91596877	91602908	L1HS:L1:LINE	-	Intronic	chr4	91645064	91645142	CCSER1	+	Non-DE	SRR6368611	Deneault et al. - Neuron	TENM1
chr4	91596877	91602908	L1HS:L1:LINE	-	Intronic	chr4	91645064	91645142	CCSER1	+	Non-DE	SRR6368587	Deneault et al. - Neuron	TENM1
chr4	91596877	91602908	L1HS:L1:LINE	-	Intronic	chr4	91645064	91645142	CCSER1	+	Non-DE	SRR6368588	Deneault et al. - Neuron	TENM1
chr4	91596877	91602908	L1HS:L1:LINE	-	Intronic	chr4	91645064	91645142	CCSER1	+	Non-DE	SRR6368579	Deneault et al. - Neuron	TENM1
chr4	104171422	104177447	L1PA2:L1:LINE	-	Intronic	chr4	104119420	104119566	CENPE	-	Non-DE	SRR6368610	Deneault et al. - Neuron	TENM1
chr4	104171422	104177447	L1PA2:L1:LINE	-	Intronic	chr4	104119420	104119566	CENPE	-	Non-DE	SRR6368611	Deneault et al. - Neuron	TENM1
chr4	104171422	104177447	L1PA2:L1:LINE	-	Intronic	chr4	104119420	104119566	CENPE	-	Non-DE	SRR6368587	Deneault et al. - Neuron	TENM1
chr4	128638142	128644524	L1PA10:L1:LINE	-	Intronic	chr4	128637479	128637934	INTU	+	Up-regulated	SRR6368611	Deneault et al. - Neuron	TENM1
chr4	128638142	128644524	L1PA10:L1:LINE	-	Intronic	chr4	128637479	128637934	INTU	+	Up-regulated	SRR6368588	Deneault et al. - Neuron	TENM1
chr4	167664640	167670800	L1PA5:L1:LINE	+	Intronic	chr4	167663147	167663210	SPOCK3	-	Non-DE	SRR6368587	Deneault et al. - Neuron	TENM1
chr4	167664640	167670800	L1PA5:L1:LINE	+	Intronic	chr4	167663147	167663210	SPOCK3	-	Non-DE	SRR6368588	Deneault et al. - Neuron	TENM1
chr5	74002130	74008268	L1PA3:L1:LINE	+	Intronic	chr5	74001043	74001145	HEXB	+	Non-DE	SRR6368611	Deneault et al. - Neuron	TENM1
chr5	74002130	74008268	L1PA3:L1:LINE	+	Intronic	chr5	74001043	74001145	HEXB	+	Non-DE	SRR6368587	Deneault et al. - Neuron	TENM1
chr5	74002130	74008268	L1PA3:L1:LINE	+	Intronic	chr5	74001043	74001145	HEXB	+	Non-DE	SRR6368588	Deneault et al. - Neuron	TENM1
chr5	74002130	74008268	L1PA3:L1:LINE	+	Intronic	chr5	74001043	74001145	HEXB	+	Up-regulated	SRR6368610	Deneault et al. - Neuron	TENM1
chr5	77414039	77420179	L1PA4:L1:LINE	+	Intronic	chr5	77411949	77412058	AP3B1	-	Up-regulated	SRR6368579	Deneault et al. - Neuron	TENM1
chr5	82753618	82759636	L1PA2:L1:LINE	-	Intergenic	chr5	82767492	82767842	VCAN	+	Up-regulated	SRR6368588	Deneault et al. - Neuron	TENM1
chr5	82753618	82759636	L1PA2:L1:LINE	-	Intergenic	chr5	82767492	82767842	VCAN	+	Non-DE	SRR6368610	Deneault et al. - Neuron	TENM1
chr5	82753618	82759636	L1PA2:L1:LINE	-	Intergenic	chr5	82767492	82767842	VCAN	+	Non-DE	SRR6368587	Deneault et al. - Neuron	TENM1
chr5	82753618	82759636	L1PA2:L1:LINE	-	Intergenic	chr5	82767492	82767842	VCAN	+	Non-DE	SRR6368579	Deneault et al. - Neuron	TENM1
chr5	139831619	139837446	L1PA5:L1:LINE	+	Intronic	chr5	139838209	139838447	ANKHD1-EIF4EBP3	+	Up-regulated	SRR6368588	Deneault et al. - Neuron	TENM1
chr6	18228620	18234510	L1PA5:L1:LINE	+	Intronic	chr6	18226404	18226473	DEK	-	Up-regulated	SRR6368588	Deneault et al. - Neuron	TENM1
chr6	76609458	76615462	L1PA3:L1:LINE	-	Intronic	chr6	76608089	76608128	MYO6	+	Non-DE	SRR6368587	Deneault et al. - Neuron	TENM1
chr6	76609458	76615462	L1PA3:L1:LINE	-	Intronic	chr6	76608089	76608128	MYO6	+	Non-DE	SRR6368588	Deneault et al. - Neuron	TENM1
chr6	80287373	80293483	L1PA6:L1:LINE	+	Intergenic	chr6	80248450	80248479	DQ582269	+	Non-DE	SRR6368587	Deneault et al. - Neuron	TENM1
chr6	116959859	116965997	L1PA3:L1:LINE	+	Intronic	chr6	116966876	116967097	ZUP1	-	Non-DE	SRR6368610	Deneault et al. - Neuron	TENM1
chr7	12536837	12542864	L1PA3:L1:LINE	+	Intronic	chr7	12596186	12596356	BC075797	+	Non-DE	SRR6368587	Deneault et al. - Neuron	TENM1
chr7	39047127	39053152	L1PA2:L1:LINE	-	Exonic	chr7	39053012	39053161	POU6F2-AS2	-	Non-DE	SRR6368587	Deneault et al. - Neuron	TENM1
chr7	39047127	39053152	L1PA2:L1:LINE	-	Exonic	chr7	39053012	39053161	POU6F2-AS2	-	Non-DE	SRR6368588	Deneault et al. - Neuron	TENM1
chr7	91813070	91819192	L1PA3:L1:LINE	-	Intronic	chr7	91808164	91809228	CYP51A1-AS1	+	Non-DE	SRR6368579	Deneault et al. - Neuron	TENM1
chr7	91813070	91819192	L1PA3:L1:LINE	-	Intronic	chr7	91808164	91809228	CYP51A1-AS1	+	Non-DE	SRR6368587	Deneault et al. - Neuron	TENM1
chr7	91813070	91819192	L1PA3:L1:LINE	-	Intronic	chr7	91808164	91809228	CYP51A1-AS1	+	Non-DE	SRR6368588	Deneault et al. - Neuron	TENM1
chr8	63885234	63891726	L1PA7:L1:LINE	-	Exonic	chr8	63890419	63897460	UG0898H09	+	Non-DE	SRR6368579	Deneault et al. - Neuron	TENM1
chr8	73968584	73974141	L1PA6:L1:LINE	+	Intronic	chr8	73976777	73979693	SBSPON	-	Up-regulated	SRR6368587	Deneault et al. - Neuron	TENM1
chr8	103329168	103335319	L1PA3:L1:LINE	+	Intronic	chr8	103335538	103335723	UBR5	-	Up-regulated	SRR6368587	Deneault et al. - Neuron	TENM1
chr9	42690271	42696344	L1PA3:L1:LINE	-	Intronic	chr9	42689821	42689878	CBWD7	+	Non-DE	SRR6368579	Deneault et al. - Neuron	TENM1
chr9	42690271	42696344	L1PA3:L1:LINE	-	Intronic	chr9	42689821	42689878	CBWD7	+	Non-DE	SRR6368587	Deneault et al. - Neuron	TENM1
chr9	42690271	42696344	L1PA3:L1:LINE	-	Intronic	chr9	42689821	42689878	CBWD7	+	Non-DE	SRR6368588	Deneault et al. - Neuron	TENM1
chr9	70199709	70205784	L1PA3:L1:LINE	+	Intronic	chr9	70195030	70195743	CBWD5	-	Up-regulated	SRR6368579	Deneault et al. - Neuron	TENM1
chr9	70199709	70205784	L1PA3:L1:LINE	+	Intronic	chr9	70195030	70195743	CBWD5	-	Non-DE	SRR6368587	Deneault et al. - Neuron	TENM1
chr9	70199709	70205784	L1PA3:L1:LINE	+	Intronic	chr9	70195030	70195743	CBWD5	-	Non-DE	SRR6368588	Deneault et al. - Neuron	TENM1
chr9	70450620	70456693	L1PA3:L1:LINE	+	Intronic	chr9	70457086	70457143	CBWD5	-	Non-DE	SRR6368588	Deneault et al. - Neuron	TENM1
chr9	70450620	70456693	L1PA3:L1:LINE	+	Intronic	chr9	70457086	70457143	CBWD5	-	Up-regulated	SRR6368579	Deneault et al. - Neuron	TENM1
chr9	70450620	70456693	L1PA3:L1:LINE	+	Intronic	chr9	70457086	70457143	CBWD5	-	Non-DE	SRR6368587	Deneault et al. - Neuron	TENM1
chr9	94976690	94982694	L1PA2:L1:LINE	+	Intronic	chr9	94984801	94984954	IARS1	-	Non-DE	SRR6368610	Deneault et al. - Neuron	TENM1
chrUn_gl000211	11314	17387	L1PA3:L1:LINE	+	Intergenic	chrUn_gl000211	21804	23742	CR933660	-	Non-DE	SRR6368579	Deneault et al. - Neuron	TENM1
chrUn_gl000211	11314	17387	L1PA3:L1:LINE	+	Intergenic	chrUn_gl000211	21804	23742	CR933660	-	Non-DE	SRR6368587	Deneault et al. - Neuron	TENM1
chrUn_gl000214	39518	45655	L1PA3:L1:LINE	-	Intergenic	chrUn_gl000214	32576	32635	BC012753	+	Non-DE	SRR6368588	Deneault et al. - Neuron	TENM1
chrUn_gl000214	39518	45655	L1PA3:L1:LINE	-	Intergenic	chrUn_gl000214	32576	32635	BC012753	+	Non-DE	SRR6368587	Deneault et al. - Neuron	TENM1
chrUn_gl000214	39518	45655	L1PA3:L1:LINE	-	Intergenic	chrUn_gl000214	32576	32635	BC012753	+	Non-DE	SRR6368579	Deneault et al. - Neuron	TENM1
chrX	11725368	11731399	L1HS:L1:LINE	+	Intronic	chrX	11682360	11683821	ARHGAP6	-	Up-regulated	SRR6368588	Deneault et al. - Neuron	TENM1
chrX	11725368	11731399	L1HS:L1:LINE	+	Intronic	chrX	11682360	11683821	ARHGAP6	-	Up-regulated	SRR6368587	Deneault et al. - Neuron	TENM1
chrX	11725368	11731399	L1HS:L1:LINE	+	Intronic	chrX	11682360	11683821	ARHGAP6	-	Non-DE	SRR6368579	Deneault et al. - Neuron	TENM1
chrX	11725368	11731399	L1HS:L1:LINE	+	Intronic	chrX	11682360	11683821	ARHGAP6	-	Up-regulated	SRR6368611	Deneault et al. - Neuron	TENM1
chrX	11725368	11731399	L1HS:L1:LINE	+	Intronic	chrX	11682360	11683821	ARHGAP6	-	Up-regulated	SRR6368610	Deneault et al. - Neuron	TENM1
chrX	67744363	67750771	L1PA7:L1:LINE	-	Intronic	chrX	67751722	67757127	YIPF6	+	Non-DE	SRR6368588	Deneault et al. - Neuron	TENM1
chrX	73253778	73259910	L1PA5:L1:LINE	-	Intronic	chrX	73251430	73251675	FTX	-	Non-DE	SRR6368587	Deneault et al. - Neuron	TENM1
chrX	73260445	73266814	L1PA7:L1:LINE	-	Intronic	chrX	73251430	73251675	FTX	-	Non-DE	SRR6368587	Deneault et al. - Neuron	TENM1
chrX	73291824	73297937	L1PA8:L1:LINE	-	Intronic	chrX	73251430	73251675	FTX	-	Non-DE	SRR6368588	Deneault et al. - Neuron	TENM1
chrX	73291824	73297937	L1PA8:L1:LINE	-	Intronic	chrX	73251430	73251675	FTX	-	Non-DE	SRR6368587	Deneault et al. - Neuron	TENM1
chrX	73291824	73297937	L1PA8:L1:LINE	-	Intronic	chrX	73251430	73251675	FTX	-	Non-DE	SRR6368579	Deneault et al. - Neuron	TENM1
chrX	130712654	130718709	L1PA2:L1:LINE	+	Intronic	chrX	130678047	130678974	OR13H1	+	Non-DE	SRR6368610	Deneault et al. - Neuron	TENM1
chrX	130712654	130718709	L1PA2:L1:LINE	+	Intronic	chrX	130678047	130678974	OR13H1	+	Non-DE	SRR6368588	Deneault et al. - Neuron	TENM1
chrX	154583984	154589205	L1PA13:L1:LINE	+	Intergenic	chrX	154581173	154581271	RP13-228J13.1	-	Non-DE	SRR6368587	Deneault et al. - Neuron	TENM1
chrX	154583984	154589205	L1PA13:L1:LINE	+	Intergenic	chrX	154581173	154581271	RP13-228J13.1	-	Non-DE	SRR6368588	Deneault et al. - Neuron	TENM1
chrX	154711018	154716239	L1PA13:L1:LINE	-	Intronic	chrX	154716243	154716707	RP11-218L14.4	+	Non-DE	SRR6368587	Deneault et al. - Neuron	TENM1
chr1	68553278	68559388	L1PA6:L1:LINE	-	Intronic	chr1	68564141	68564436	WLS	-	Up-regulated	SRR9292620	Velmeshev et al.	ACC
chr1	116594534	116600673	L1PA3:L1:LINE	+	Intronic	chr1	116605382	116605503	SLC22A15	+	Non-DE	SRR9292602	Velmeshev et al.	ACC
chr1	121143307	121149329	L1PA3:L1:LINE	+	Intronic	chr1	121129494	121129827	SRGAP2D	+	Non-DE	SRR9292614	Velmeshev et al.	ACC
chr1	121143307	121149329	L1PA3:L1:LINE	+	Intronic	chr1	121129494	121129827	SRGAP2D	+	Non-DE	SRR9292620	Velmeshev et al.	ACC
chr1	121143307	121149329	L1PA3:L1:LINE	+	Intronic	chr1	121129494	121129827	SRGAP2D	+	Non-DE	SRR9292607	Velmeshev et al.	ACC
chr1	211127241	211133387	L1PA6:L1:LINE	-	Intronic	chr1	211092981	211093411	KCNH1	-	Non-DE	SRR9292620	Velmeshev et al.	ACC
chr1	211127241	211133387	L1PA6:L1:LINE	-	Intronic	chr1	211092981	211093411	KCNH1	-	Non-DE	SRR9292621	Velmeshev et al.	ACC
chr1	211127241	211133387	L1PA6:L1:LINE	-	Intronic	chr1	211092981	211093411	KCNH1	-	Non-DE	SRR9292596	Velmeshev et al.	ACC
chr1	211127241	211133387	L1PA6:L1:LINE	-	Intronic	chr1	211092981	211093411	KCNH1	-	Non-DE	SRR9292614	Velmeshev et al.	ACC
chr1	220814954	220821404	L1PA10:L1:LINE	+	Intronic	chr1	220823961	220824062	MARK1	+	Down-regulated	SRR9292620	Velmeshev et al.	ACC
chr1	220814954	220821404	L1PA10:L1:LINE	+	Intronic	chr1	220823961	220824062	MARK1	+	Non-DE	SRR9292614	Velmeshev et al.	ACC
chr1	237238564	237244593	L1HS:L1:LINE	+	Intronic	chr1	237205701	237205869	RYR2	+	Non-DE	SRR9292620	Velmeshev et al.	ACC
chr1	237238564	237244593	L1HS:L1:LINE	+	Intronic	chr1	237205701	237205869	RYR2	+	Non-DE	SRR9292621	Velmeshev et al.	ACC
chr10	10692820	10698847	L1PA2:L1:LINE	+	Intergenic	chr10	10826401	10826632	SFTA1P	-	Non-DE	SRR9292614	Velmeshev et al.	ACC
chr10	10692820	10698847	L1PA2:L1:LINE	+	Intergenic	chr10	10826401	10826632	SFTA1P	-	Non-DE	SRR9292621	Velmeshev et al.	ACC
chr10	10692820	10698847	L1PA2:L1:LINE	+	Intergenic	chr10	10826401	10826632	SFTA1P	-	Non-DE	SRR9292620	Velmeshev et al.	ACC
chr10	49580263	49585413	L1PA7:L1:LINE	+	Intronic	chr10	49609654	49609825	MAPK8	+	Down-regulated	SRR9292620	Velmeshev et al.	ACC
chr10	49580263	49585413	L1PA7:L1:LINE	+	Intronic	chr10	49609654	49609825	MAPK8	+	Non-DE	SRR9292621	Velmeshev et al.	ACC
chr10	49580263	49585413	L1PA7:L1:LINE	+	Intronic	chr10	49609654	49609825	MAPK8	+	Non-DE	SRR9292614	Velmeshev et al.	ACC
chr10	96865055	96871181	L1PA6:L1:LINE	-	Intronic	chr10	96828991	96829254	CYP2C8	-	Non-DE	SRR9292614	Velmeshev et al.	ACC
chr10	96865055	96871181	L1PA6:L1:LINE	-	Intronic	chr10	96828991	96829254	CYP2C8	-	Non-DE	SRR9292620	Velmeshev et al.	ACC
chr11	14799221	14805319	L1PA5:L1:LINE	+	Intronic	chr11	14807982	14808231	PDE3B	+	Non-DE	SRR9292621	Velmeshev et al.	ACC
chr11	14799221	14805319	L1PA5:L1:LINE	+	Intronic	chr11	14807982	14808231	PDE3B	+	Up-regulated	SRR9292620	Velmeshev et al.	ACC
chr11	14799221	14805319	L1PA5:L1:LINE	+	Intronic	chr11	14807982	14808231	PDE3B	+	Up-regulated	SRR9292614	Velmeshev et al.	ACC
chr11	14799221	14805319	L1PA5:L1:LINE	+	Intronic	chr11	14807982	14808231	PDE3B	+	Up-regulated	SRR9292596	Velmeshev et al.	ACC
chr11	40866705	40873141	L1PA7:L1:LINE	-	Intronic	chr11	40669691	40669828	LRRC4C	-	Non-DE	SRR9292621	Velmeshev et al.	ACC
chr11	40866705	40873141	L1PA7:L1:LINE	-	Intronic	chr11	40669691	40669828	LRRC4C	-	Non-DE	SRR9292620	Velmeshev et al.	ACC
chr11	40866705	40873141	L1PA7:L1:LINE	-	Intronic	chr11	40669691	40669828	LRRC4C	-	Non-DE	SRR9292614	Velmeshev et al.	ACC
chr11	83223566	83229707	L1PA4:L1:LINE	-	Intronic	chr11	83243750	83243826	DLG2	-	Non-DE	SRR9292621	Velmeshev et al.	ACC
chr11	83223566	83229707	L1PA4:L1:LINE	-	Intronic	chr11	83243750	83243826	DLG2	-	Non-DE	SRR9292620	Velmeshev et al.	ACC
chr11	83223566	83229707	L1PA4:L1:LINE	-	Intronic	chr11	83243750	83243826	DLG2	-	Non-DE	SRR9292614	Velmeshev et al.	ACC
chr11	83223566	83229707	L1PA4:L1:LINE	-	Intronic	chr11	83243750	83243826	DLG2	-	Non-DE	SRR9292602	Velmeshev et al.	ACC
chr11	113094669	113100816	L1PA5:L1:LINE	+	Intronic	chr11	113101917	113101995	NCAM1	+	Non-DE	SRR9292620	Velmeshev et al.	ACC
chr11	132190054	132196077	L1PA4:L1:LINE	+	Intronic	chr11	132200046	132200079	NTM	+	Up-regulated	SRR9292620	Velmeshev et al.	ACC
chr11	132190054	132196077	L1PA4:L1:LINE	+	Intronic	chr11	132200046	132200079	NTM	+	Non-DE	SRR9292621	Velmeshev et al.	ACC
chr11	132190054	132196077	L1PA4:L1:LINE	+	Intronic	chr11	132200046	132200079	NTM	+	Non-DE	SRR9292614	Velmeshev et al.	ACC
chr11	132626675	132633167	L1PA7:L1:LINE	-	Intronic	chr11	132526981	132527214	OPCML	-	Down-regulated	SRR9292620	Velmeshev et al.	ACC
chr11	132626675	132633167	L1PA7:L1:LINE	-	Intronic	chr11	132526981	132527214	OPCML	-	Non-DE	SRR9292621	Velmeshev et al.	ACC
chr11	132626675	132633167	L1PA7:L1:LINE	-	Intronic	chr11	132526981	132527214	OPCML	-	Non-DE	SRR9292614	Velmeshev et al.	ACC
chr12	8453664	8459778	L1PA4:L1:LINE	-	Intronic	chr12	8509559	8509737	LINC00937	-	Non-DE	SRR9292620	Velmeshev et al.	ACC
chr12	62501773	62508228	L1PA7:L1:LINE	-	Intronic	chr12	62585039	62586620	TAFA2	-	Non-DE	SRR9292596	Velmeshev et al.	ACC
chr12	62501773	62508228	L1PA7:L1:LINE	-	Intronic	chr12	62585039	62586620	TAFA2	-	Non-DE	SRR9292614	Velmeshev et al.	ACC
chr12	62501773	62508228	L1PA7:L1:LINE	-	Intronic	chr12	62585039	62586620	TAFA2	-	Non-DE	SRR9292620	Velmeshev et al.	ACC
chr12	62501773	62508228	L1PA7:L1:LINE	-	Intronic	chr12	62585039	62586620	TAFA2	-	Non-DE	SRR9292621	Velmeshev et al.	ACC
chr12	78047744	78053902	L1PA3:L1:LINE	+	Intronic	chr12	78225068	78225484	NAV3	+	Non-DE	SRR9292621	Velmeshev et al.	ACC
chr12	78047744	78053902	L1PA3:L1:LINE	+	Intronic	chr12	78225068	78225484	NAV3	+	Non-DE	SRR9292620	Velmeshev et al.	ACC
chr12	78047744	78053902	L1PA3:L1:LINE	+	Intronic	chr12	78225068	78225484	NAV3	+	Non-DE	SRR9292614	Velmeshev et al.	ACC
chr13	36582366	36588374	L1PA2:L1:LINE	-	Intronic	chr13	36639746	36639818	TRNA_Pseudo	-	Non-DE	SRR9292620	Velmeshev et al.	ACC
chr14	32929548	32935960	L1PA8:L1:LINE	+	Intronic	chr14	32954301	32954322	JA429831	+	Non-DE	SRR9292621	Velmeshev et al.	ACC
chr14	32929548	32935960	L1PA8:L1:LINE	+	Intronic	chr14	32954301	32954322	JA429831	+	Non-DE	SRR9292596	Velmeshev et al.	ACC
chr14	67169341	67174507	L1PA8A:L1:LINE	+	Intronic	chr14	67147824	67147903	GPHN	+	Non-DE	SRR9292621	Velmeshev et al.	ACC
chr14	67169341	67174507	L1PA8A:L1:LINE	+	Intronic	chr14	67147824	67147903	GPHN	+	Non-DE	SRR9292620	Velmeshev et al.	ACC
chr14	67169341	67174507	L1PA8A:L1:LINE	+	Intronic	chr14	67147824	67147903	GPHN	+	Non-DE	SRR9292614	Velmeshev et al.	ACC
chr14	67169341	67174507	L1PA8A:L1:LINE	+	Intronic	chr14	67147824	67147903	GPHN	+	Non-DE	SRR9292596	Velmeshev et al.	ACC
chr15	25500760	25506894	L1PA5:L1:LINE	+	Intronic	chr15	25509673	25509726	SNORD115-45	+	Non-DE	SRR9292620	Velmeshev et al.	ACC
chr15	31919293	31925475	L1PA4:L1:LINE	-	Intronic	chr15	31947298	31947542	OTUD7A	-	Non-DE	SRR9292620	Velmeshev et al.	ACC
chr15	31919293	31925475	L1PA4:L1:LINE	-	Intronic	chr15	31947298	31947542	OTUD7A	-	Non-DE	SRR9292614	Velmeshev et al.	ACC
chr15	31919293	31925475	L1PA4:L1:LINE	-	Intronic	chr15	31947298	31947542	OTUD7A	-	Non-DE	SRR9292621	Velmeshev et al.	ACC
chr17	49973441	49978975	L1PA15:L1:LINE	-	Intronic	chr17	50008349	50008492	CA10	-	Non-DE	SRR9292621	Velmeshev et al.	ACC
chr17	49973441	49978975	L1PA15:L1:LINE	-	Intronic	chr17	50008349	50008492	CA10	-	Non-DE	SRR9292620	Velmeshev et al.	ACC
chr17	49973441	49978975	L1PA15:L1:LINE	-	Intronic	chr17	50008349	50008492	CA10	-	Non-DE	SRR9292614	Velmeshev et al.	ACC
chr17	49973441	49978975	L1PA15:L1:LINE	-	Intronic	chr17	50008349	50008492	CA10	-	Non-DE	SRR9292596	Velmeshev et al.	ACC
chr17	52590562	52596690	L1PA8A:L1:LINE	-	Intergenic	chr17	52848309	52848638	RN7SKP14	+	Non-DE	SRR9292621	Velmeshev et al.	ACC
chr17	52590562	52596690	L1PA8A:L1:LINE	-	Intergenic	chr17	52848309	52848638	RN7SKP14	+	Non-DE	SRR9292620	Velmeshev et al.	ACC
chr17	52590562	52596690	L1PA8A:L1:LINE	-	Intergenic	chr17	52848309	52848638	RN7SKP14	+	Non-DE	SRR9292614	Velmeshev et al.	ACC
chr17	59187590	59193599	L1PA2:L1:LINE	+	Intronic	chr17	59161827	59161925	BCAS3	+	Non-DE	SRR9292620	Velmeshev et al.	ACC
chr17	59187590	59193599	L1PA2:L1:LINE	+	Intronic	chr17	59161827	59161925	BCAS3	+	Non-DE	SRR9292614	Velmeshev et al.	ACC
chr17	59187590	59193599	L1PA2:L1:LINE	+	Intronic	chr17	59161827	59161925	BCAS3	+	Non-DE	SRR9292621	Velmeshev et al.	ACC
chr18	3695243	3700586	L1PA7:L1:LINE	-	Intronic	chr18	3729134	3729375	DLGAP1	-	Non-DE	SRR9292621	Velmeshev et al.	ACC
chr18	3695243	3700586	L1PA7:L1:LINE	-	Intronic	chr18	3729134	3729375	DLGAP1	-	Down-regulated	SRR9292620	Velmeshev et al.	ACC
chr18	3695243	3700586	L1PA7:L1:LINE	-	Intronic	chr18	3729134	3729375	DLGAP1	-	Non-DE	SRR9292596	Velmeshev et al.	ACC
chr18	3695243	3700586	L1PA7:L1:LINE	-	Intronic	chr18	3729134	3729375	DLGAP1	-	Non-DE	SRR9292614	Velmeshev et al.	ACC
chr19	30043256	30048324	L1PA7:L1:LINE	+	Intronic	chr19	30054752	30055226	VSTM2B	+	Non-DE	SRR9292621	Velmeshev et al.	ACC
chr19	30043256	30048324	L1PA7:L1:LINE	+	Intronic	chr19	30054752	30055226	VSTM2B	+	Non-DE	SRR9292620	Velmeshev et al.	ACC
chr19	30043256	30048324	L1PA7:L1:LINE	+	Intronic	chr19	30054752	30055226	VSTM2B	+	Non-DE	SRR9292614	Velmeshev et al.	ACC
chr19	30043256	30048324	L1PA7:L1:LINE	+	Intronic	chr19	30054752	30055226	VSTM2B	+	Non-DE	SRR9292602	Velmeshev et al.	ACC
chr19	40543822	40549961	L1PA4:L1:LINE	-	Intronic	chr19	40534166	40542533	ZNF780B	-	Non-DE	SRR9292614	Velmeshev et al.	ACC
chr19	40543822	40549961	L1PA4:L1:LINE	-	Intronic	chr19	40534166	40542533	ZNF780B	-	Down-regulated	SRR9292620	Velmeshev et al.	ACC
chr19	44473800	44478910	L1PA11:L1:LINE	+	Intronic	chr19	44469955	44471752	ZNF221	+	Non-DE	SRR9292602	Velmeshev et al.	ACC
chr19	44473800	44478910	L1PA11:L1:LINE	+	Intronic	chr19	44469955	44471752	ZNF221	+	Non-DE	SRR9292614	Velmeshev et al.	ACC
chr19	44473800	44478910	L1PA11:L1:LINE	+	Intronic	chr19	44469955	44471752	ZNF221	+	Non-DE	SRR9292620	Velmeshev et al.	ACC
chr19	44473800	44478910	L1PA11:L1:LINE	+	Intronic	chr19	44469955	44471752	ZNF221	+	Non-DE	SRR9292621	Velmeshev et al.	ACC
chr2	40459740	40465767	L1PA2:L1:LINE	-	Intronic	chr2	40478823	40478914	SLC8A1-AS1	+	Non-DE	SRR9292621	Velmeshev et al.	ACC
chr2	40459740	40465767	L1PA2:L1:LINE	-	Intronic	chr2	40478823	40478914	SLC8A1-AS1	+	Non-DE	SRR9292620	Velmeshev et al.	ACC
chr2	40459740	40465767	L1PA2:L1:LINE	-	Intronic	chr2	40478823	40478914	SLC8A1-AS1	+	Non-DE	SRR9292614	Velmeshev et al.	ACC
chr2	142199998	142206420	L1PA7:L1:LINE	-	Intronic	chr2	142237964	142238102	LRP1B	-	Non-DE	SRR9292614	Velmeshev et al.	ACC
chr2	142199998	142206420	L1PA7:L1:LINE	-	Intronic	chr2	142237964	142238102	LRP1B	-	Non-DE	SRR9292620	Velmeshev et al.	ACC
chr2	142199998	142206420	L1PA7:L1:LINE	-	Intronic	chr2	142237964	142238102	LRP1B	-	Non-DE	SRR9292621	Velmeshev et al.	ACC
chr2	149138172	149143692	L1PA4:L1:LINE	+	Intronic	chr2	149099782	149099905	MBD5	+	Non-DE	SRR9292621	Velmeshev et al.	ACC
chr2	149138172	149143692	L1PA4:L1:LINE	+	Intronic	chr2	149099782	149099905	MBD5	+	Non-DE	SRR9292620	Velmeshev et al.	ACC
chr2	149138172	149143692	L1PA4:L1:LINE	+	Intronic	chr2	149099782	149099905	MBD5	+	Non-DE	SRR9292614	Velmeshev et al.	ACC
chr2	197386208	197392224	L1PA2:L1:LINE	-	Intronic	chr2	197457187	197457335	HECW2	-	Non-DE	SRR9292620	Velmeshev et al.	ACC
chr2	197386208	197392224	L1PA2:L1:LINE	-	Intronic	chr2	197457187	197457335	HECW2	-	Non-DE	SRR9292614	Velmeshev et al.	ACC
chr2	197386208	197392224	L1PA2:L1:LINE	-	Intronic	chr2	197457187	197457335	HECW2	-	Non-DE	SRR9292621	Velmeshev et al.	ACC
chr2	198882661	198889133	L1PA7:L1:LINE	+	Intronic	chr2	198948481	198950956	PLCL1	+	Non-DE	SRR9292614	Velmeshev et al.	ACC
chr2	198882661	198889133	L1PA7:L1:LINE	+	Intronic	chr2	198948481	198950956	PLCL1	+	Non-DE	SRR9292620	Velmeshev et al.	ACC
chr2	198882661	198889133	L1PA7:L1:LINE	+	Intronic	chr2	198948481	198950956	PLCL1	+	Non-DE	SRR9292621	Velmeshev et al.	ACC
chr2	210352719	210359164	L1PA7:L1:LINE	+	Intronic	chr2	210444402	210444479	MAP2	+	Non-DE	SRR9292596	Velmeshev et al.	ACC
chr2	210352719	210359164	L1PA7:L1:LINE	+	Intronic	chr2	210444402	210444479	MAP2	+	Non-DE	SRR9292621	Velmeshev et al.	ACC
chr2	210352719	210359164	L1PA7:L1:LINE	+	Intronic	chr2	210444402	210444479	MAP2	+	Non-DE	SRR9292620	Velmeshev et al.	ACC
chr22	22631182	22637196	L1PA3:L1:LINE	-	Intergenic	chr22	22652522	22652576	CH17-264L24.2	+	Non-DE	SRR9292614	Velmeshev et al.	ACC
chr22	22631182	22637196	L1PA3:L1:LINE	-	Intergenic	chr22	22652522	22652576	CH17-264L24.2	+	Non-DE	SRR9292620	Velmeshev et al.	ACC
chr3	21596708	21603100	L1PA7:L1:LINE	-	Intronic	chr3	21606065	21606176	ZNF385D	-	Non-DE	SRR9292620	Velmeshev et al.	ACC
chr3	21596708	21603100	L1PA7:L1:LINE	-	Intronic	chr3	21606065	21606176	ZNF385D	-	Non-DE	SRR9292621	Velmeshev et al.	ACC
chr3	21596708	21603100	L1PA7:L1:LINE	-	Intronic	chr3	21606065	21606176	ZNF385D	-	Non-DE	SRR9292614	Velmeshev et al.	ACC
chr3	51236479	51242602	L1PA3:L1:LINE	+	Intronic	chr3	51246204	51246293	DOCK3	+	Non-DE	SRR9292620	Velmeshev et al.	ACC
chr3	51236479	51242602	L1PA3:L1:LINE	+	Intronic	chr3	51246204	51246293	DOCK3	+	Non-DE	SRR9292621	Velmeshev et al.	ACC
chr3	51236479	51242602	L1PA3:L1:LINE	+	Intronic	chr3	51246204	51246293	DOCK3	+	Non-DE	SRR9292614	Velmeshev et al.	ACC
chr3	85202221	85208004	L1PA3:L1:LINE	+	Intronic	chr3	85008132	85008819	CADM2	+	Non-DE	SRR9292620	Velmeshev et al.	ACC
chr3	85202221	85208004	L1PA3:L1:LINE	+	Intronic	chr3	85008132	85008819	CADM2	+	Non-DE	SRR9292614	Velmeshev et al.	ACC
chr3	85202221	85208004	L1PA3:L1:LINE	+	Intronic	chr3	85008132	85008819	CADM2	+	Non-DE	SRR9292621	Velmeshev et al.	ACC
chr3	85339080	85345090	L1PA2:L1:LINE	+	Intronic	chr3	85434859	85434942	MIR5688	+	Non-DE	SRR9292614	Velmeshev et al.	ACC
chr3	85339080	85345090	L1PA2:L1:LINE	+	Intronic	chr3	85434859	85434942	MIR5688	+	Non-DE	SRR9292620	Velmeshev et al.	ACC
chr3	85339080	85345090	L1PA2:L1:LINE	+	Intronic	chr3	85434859	85434942	MIR5688	+	Non-DE	SRR9292621	Velmeshev et al.	ACC
chr3	115922232	115928273	L1PA2:L1:LINE	-	Intronic	chr3	115816179	115816277	Mir_340	-	Non-DE	SRR9292621	Velmeshev et al.	ACC
[truncated: 199 more rows]

## Sheet: Table S14. Upregulated L1 - exp gene pairs (Velmeshev)
Sample	L1_chr	L1_start	L1_end	L1_subfamily:family:class	L1_strand	L1_Zscore	Gene_chr	Gene_start	Gene_end	Gene_strand	Gene_name	Gene_Zscore	Gene_SFARI_score
SRR9292614	chr1	220814954	220821404	L1PA10:L1:LINE	+	3.6450041920797496	chr1	220701568	220837803	+	MARK1	-0.5743237295063665	3
SRR9292614	chr10	49580263	49585413	L1PA7:L1:LINE	+	3.5507286203468102	chr10	49514698	49647403	+	MAPK8	-1.7525153638861866	NA
SRR9292614	chr11	14799221	14805319	L1PA5:L1:LINE	+	6.714092059933226	chr11	14665269	14892350	+	PDE3B	6.307985846343622	NA
SRR9292614	chr11	40866705	40873141	L1PA7:L1:LINE	-	5.06757416966626	chr11	40135753	41481323	-	LRRC4C	0.2750030547583095	1
SRR9292614	chr11	83223566	83229707	L1PA4:L1:LINE	-	5.893699021370133	chr11	83166055	85338966	-	DLG2	-0.2516303352620679	2
SRR9292614	chr11	132190054	132196077	L1PA4:L1:LINE	+	4.792937298691642	chr11	131240373	132206716	+	NTM	2.5688562381871547	NA
SRR9292614	chr11	132626675	132633167	L1PA7:L1:LINE	-	3.0202847054177195	chr11	132284871	133402414	-	OPCML	-1.486408735008887	NA
SRR9292614	chr14	67169341	67174507	L1PA8A:L1:LINE	+	3.113756081587633	chr14	66974125	67648520	+	GPHN	-0.09052254436688081	2
SRR9292614	chr15	31919293	31925475	L1PA4:L1:LINE	-	4.629868238877246	chr15	31775329	32162992	-	OTUD7A	-0.30106477556072764	2
SRR9292614	chr17	49973441	49978975	L1PA15:L1:LINE	-	4.830020598749746	chr17	49707674	50237377	-	CA10	-0.5115508435705439	NA
SRR9292614	chr17	59187590	59193599	L1PA2:L1:LINE	+	5.333294839845433	chr17	58754814	59470199	+	BCAS3	-2.065580268134118	NA
SRR9292614	chr18	3695243	3700586	L1PA7:L1:LINE	-	3.9125257194634053	chr18	3496030	4455335	-	DLGAP1	-1.4769687620055083	2
SRR9292614	chr19	30043256	30048324	L1PA7:L1:LINE	+	7.907109601186071	chr19	30017406	30055386	+	VSTM2B	-1.9780737541918256	NA
SRR9292614	chr19	40543822	40549961	L1PA4:L1:LINE	-	3.8957140058962993	chr19	40534167	40562116	-	ZNF780B	-1.0063130059689014	NA
SRR9292614	chr19	44473800	44478910	L1PA11:L1:LINE	+	3.180902527174391	chr19	44472014	44502477	+	ZNF155	0.2793560831474482	NA
SRR9292614	chr2	40459740	40465767	L1PA2:L1:LINE	-	4.317518940236268	chr2	40324410	40838193	-	SLC8A1	-0.9987020801806648	NA
SRR9292614	chr2	142199998	142206420	L1PA7:L1:LINE	-	4.8857447274437105	chr2	140988992	142889270	-	LRP1B	0.185988279750179	NA
SRR9292614	chr2	149138172	149143692	L1PA4:L1:LINE	+	4.58986646215706	chr2	148778580	149275805	+	MBD5	0.29157283288381736	1
SRR9292614	chr2	197386208	197392224	L1PA2:L1:LINE	-	3.5436202761136193	chr2	197059094	197458416	-	HECW2	-1.2412687869673071	2
SRR9292614	chr2	198882661	198889133	L1PA7:L1:LINE	+	3.053586524393884	chr2	198669426	199437305	+	PLCL1	-0.7104867818208966	NA
SRR9292614	chr3	21596708	21603100	L1PA7:L1:LINE	-	3.6675339953391	chr3	21459915	22414812	-	ZNF385D	2.10913146588578	NA
SRR9292614	chr3	51236479	51242602	L1PA3:L1:LINE	+	3.8939397668160236	chr3	50712672	51421629	+	DOCK3	-1.0960372920400145	NA
SRR9292614	chr3	85202221	85208004	L1PA3:L1:LINE	+	3.4242474345551996	chr3	85008132	86123579	+	CADM2	-0.6384098524576944	3
SRR9292614	chr3	85339080	85345090	L1PA2:L1:LINE	+	4.175007539192776	chr3	85008132	86123579	+	CADM2	-0.6384098524576944	3
SRR9292614	chr3	115922232	115928273	L1PA2:L1:LINE	-	6.173407154096177	chr3	115521235	117716095	-	LSAMP	2.1375463964900914	NA
SRR9292614	chr3	150959560	150965560	L1PA2:L1:LINE	+	5.468187870450104	chr3	150803484	151154860	+	MED12L	0.6118154204315093	S
SRR9292614	chr3	159140855	159146997	L1PA3:L1:LINE	+	3.4535591010102333	chr3	158680024	159615155	+	IQCJ-SCHIP1	-1.638317648762002	NA
SRR9292614	chr3	159208911	159215050	L1PA4:L1:LINE	+	5.553635945632476	chr3	158680024	159615155	+	IQCJ-SCHIP1	-1.638317648762002	NA
SRR9292614	chr4	86991543	86997572	L1PA2:L1:LINE	-	5.882277980448956	chr4	86936276	87515284	-	MAPK10	-1.2212310820220895	NA
SRR9292614	chr4	87108935	87115354	L1PA7:L1:LINE	-	3.2643742206410518	chr4	86936276	87515284	-	MAPK10	-1.2212310820220895	NA
SRR9292614	chr5	129343000	129348122	L1PA15:L1:LINE	+	4.088678845807485	chr5	129240165	129522327	+	CHSY3	-1.2568724691325663	NA
SRR9292614	chr5	136753492	136759608	L1PA4:L1:LINE	-	4.199181529728973	chr5	136310987	136934068	-	SPOCK1	-0.9545310227035669	NA
SRR9292614	chr5	138341143	138347175	L1PA2:L1:LINE	-	4.259274581116388	chr5	138282409	138629246	-	SIL1	-0.8105246601697494	NA
SRR9292614	chr5	139895099	139900527	L1PA3:L1:LINE	+	3.027710294965682	chr5	139781399	139929163	+	ANKHD1	2.625420357517702	NA
SRR9292614	chr5	139895099	139900527	L1PA3:L1:LINE	+	3.027710294965682	chr5	139781493	139929154	+	ANKHD1-EIF4EBP3	2.742591570457674	NA
SRR9292614	chr7	69662314	69668343	L1HS:L1:LINE	+	4.445592158646316	chr7	69063905	70258054	+	AUTS2	1.3005788114912047	1
SRR9292614	chr7	78859110	78865127	L1PA2:L1:LINE	-	4.476755875169404	chr7	77646393	79082890	-	MAGI2	-0.15137479871275447	NA
SRR9292614	chr8	4426645	4432101	L1PA7:L1:LINE	-	4.614753214528124	chr8	2792875	4852494	-	CSMD1	-1.0388680502818286	3
SRR9292614	chr8	107572952	107579352	L1PA7:L1:LINE	+	3.2283985880591843	chr8	107282473	107764922	+	OXR1	-1.3698039299444507	NA
SRR9292614	chr9	19762111	19767759	L1PA7:L1:LINE	-	3.583292866103	chr9	19507450	19786926	-	SLC24A2	-0.9293753404529663	3
SRR9292620	chr1	220814954	220821404	L1PA10:L1:LINE	+	6.469949978791455	chr1	220701568	220837803	+	MARK1	-3.106177609295439	3
SRR9292620	chr1	237238564	237244593	L1HS:L1:LINE	+	3.9932422868142097	chr1	237205505	237997288	+	RYR2	-0.5282277134958488	NA
SRR9292620	chr10	49580263	49585413	L1PA7:L1:LINE	+	4.816671146197599	chr10	49514698	49647403	+	MAPK8	-3.427690916506732	NA
SRR9292620	chr11	14799221	14805319	L1PA5:L1:LINE	+	12.620091469896348	chr11	14665269	14892350	+	PDE3B	16.43360497899803	NA
SRR9292620	chr11	40866705	40873141	L1PA7:L1:LINE	-	3.199021083606864	chr11	40135753	41481323	-	LRRC4C	-1.3990154082345883	1
SRR9292620	chr11	83223566	83229707	L1PA4:L1:LINE	-	7.8958398652317	chr11	83166055	85338966	-	DLG2	-2.343090672376573	2
SRR9292620	chr11	113094669	113100816	L1PA5:L1:LINE	+	5.255156157997918	chr11	112831997	113149158	+	NCAM1	-0.005618362095817049	NA
SRR9292620	chr11	132190054	132196077	L1PA4:L1:LINE	+	8.386638067011543	chr11	131240373	132206716	+	NTM	3.134189387910322	NA
SRR9292620	chr11	132626675	132633167	L1PA7:L1:LINE	-	7.378747977120306	chr11	132284871	133402414	-	OPCML	-3.0181608099816835	NA
SRR9292620	chr13	36582366	36588374	L1PA2:L1:LINE	-	3.9047665827078712	chr13	36345478	36705443	-	DCLK1	-3.193437869532365	NA
SRR9292620	chr14	67169341	67174507	L1PA8A:L1:LINE	+	6.621381010570542	chr14	66974125	67648520	+	GPHN	-0.9321082444811939	2
SRR9292620	chr15	31919293	31925475	L1PA4:L1:LINE	-	4.4355192001693515	chr15	31775329	32162992	-	OTUD7A	-0.8501787320054253	2
SRR9292620	chr17	49973441	49978975	L1PA15:L1:LINE	-	6.906323737058545	chr17	49707674	50237377	-	CA10	-2.5382163267814053	NA
SRR9292620	chr17	59187590	59193599	L1PA2:L1:LINE	+	5.507724843108956	chr17	58754814	59470199	+	BCAS3	-2.343072045961389	NA
SRR9292620	chr18	3695243	3700586	L1PA7:L1:LINE	-	4.728834504716532	chr18	3496030	4455335	-	DLGAP1	-3.2719539280283896	2
SRR9292620	chr19	30043256	30048324	L1PA7:L1:LINE	+	17.548280336511578	chr19	30017406	30055386	+	VSTM2B	-1.1546913677321482	NA
SRR9292620	chr19	40543822	40549961	L1PA4:L1:LINE	-	5.824439842051566	chr19	40534167	40562116	-	ZNF780B	-3.186590216306714	NA
SRR9292620	chr19	44473800	44478910	L1PA11:L1:LINE	+	7.460219450388332	chr19	44472014	44502477	+	ZNF155	2.7719234000526742	NA
SRR9292620	chr2	40459740	40465767	L1PA2:L1:LINE	-	4.04290098035576	chr2	40324410	40838193	-	SLC8A1	-1.8333353499078735	NA
SRR9292620	chr2	142199998	142206420	L1PA7:L1:LINE	-	5.583276108953942	chr2	140988992	142889270	-	LRP1B	-0.38751443731530166	NA
SRR9292620	chr2	149138172	149143692	L1PA4:L1:LINE	+	9.76828890501825	chr2	148778580	149275805	+	MBD5	-0.9959016939399576	1
SRR9292620	chr2	197386208	197392224	L1PA2:L1:LINE	-	4.198400250524549	chr2	197059094	197458416	-	HECW2	-1.3255045467485922	2
SRR9292620	chr2	198882661	198889133	L1PA7:L1:LINE	+	3.5138485156733346	chr2	198669426	199437305	+	PLCL1	0.37570219114809766	NA
SRR9292620	chr2	210352719	210359164	L1PA7:L1:LINE	+	3.7737285377904812	chr2	210288782	210598842	+	MAP2	-1.9366255364871587	NA
SRR9292620	chr3	21596708	21603100	L1PA7:L1:LINE	-	4.022524070455427	chr3	21459915	22414812	-	ZNF385D	-2.624134905341046	NA
SRR9292620	chr3	51236479	51242602	L1PA3:L1:LINE	+	4.7179900102280135	chr3	50712672	51421629	+	DOCK3	-2.586118420591809	NA
SRR9292620	chr3	85202221	85208004	L1PA3:L1:LINE	+	7.629723245441382	chr3	85008132	86123579	+	CADM2	-0.3976054830569387	3
SRR9292620	chr3	85339080	85345090	L1PA2:L1:LINE	+	7.698571924228505	chr3	85008132	86123579	+	CADM2	-0.3976054830569387	3
SRR9292620	chr3	115922232	115928273	L1PA2:L1:LINE	-	7.1183312170497235	chr3	115521235	117716095	-	LSAMP	2.1136405136292233	NA
SRR9292620	chr3	150959560	150965560	L1PA2:L1:LINE	+	8.038701730593806	chr3	150803484	151154860	+	MED12L	-0.9661581137876238	S
SRR9292620	chr3	159140855	159146997	L1PA3:L1:LINE	+	6.032217833215635	chr3	158680024	159615155	+	IQCJ-SCHIP1	-1.6887371466166345	NA
SRR9292620	chr3	159208911	159215050	L1PA4:L1:LINE	+	7.4929365516087465	chr3	158680024	159615155	+	IQCJ-SCHIP1	-1.6887371466166345	NA
SRR9292620	chr4	21771611	21778019	L1PA8A:L1:LINE	-	5.557746477864881	chr4	20730239	21950422	-	KCNIP4	-3.7773575021352115	NA
SRR9292620	chr4	86991543	86997572	L1PA2:L1:LINE	-	8.169988287397796	chr4	86936276	87515284	-	MAPK10	-2.310919401714626	NA
SRR9292620	chr4	87108935	87115354	L1PA7:L1:LINE	-	5.065490802740221	chr4	86936276	87515284	-	MAPK10	-2.310919401714626	NA
SRR9292620	chr5	129343000	129348122	L1PA15:L1:LINE	+	6.410042720087164	chr5	129240165	129522327	+	CHSY3	-2.4440405162261234	NA
SRR9292620	chr5	136753492	136759608	L1PA4:L1:LINE	-	5.513851677303036	chr5	136310987	136934068	-	SPOCK1	-1.7704592770909968	NA
SRR9292620	chr5	138341143	138347175	L1PA2:L1:LINE	-	6.756779630144151	chr5	138282409	138629246	-	SIL1	-1.4688242328868035	NA
SRR9292620	chr5	139895099	139900527	L1PA3:L1:LINE	+	6.125641949756185	chr5	139781399	139929163	+	ANKHD1	6.435821701815535	NA
SRR9292620	chr5	139895099	139900527	L1PA3:L1:LINE	+	6.125641949756185	chr5	139781493	139929154	+	ANKHD1-EIF4EBP3	6.552181699960481	NA
SRR9292620	chr7	69662314	69668343	L1HS:L1:LINE	+	9.469927102105991	chr7	69063905	70258054	+	AUTS2	2.6416156156640427	1
SRR9292620	chr7	78859110	78865127	L1PA2:L1:LINE	-	4.507639438229301	chr7	77646393	79082890	-	MAGI2	0.7884608681635623	NA
SRR9292620	chr8	4426645	4432101	L1PA7:L1:LINE	-	15.816223228736852	chr8	2792875	4852494	-	CSMD1	-1.9298669298509012	3
SRR9292620	chr8	107572952	107579352	L1PA7:L1:LINE	+	4.200813716936952	chr8	107282473	107764922	+	OXR1	-2.9970472228273515	NA
SRR9292621	chr10	49580263	49585413	L1PA7:L1:LINE	+	5.468352754439766	chr10	49514698	49647403	+	MAPK8	-2.602247252111302	NA
SRR9292621	chr11	14799221	14805319	L1PA5:L1:LINE	+	4.299151364012761	chr11	14665269	14892350	+	PDE3B	2.0790807836925618	NA
SRR9292621	chr11	40866705	40873141	L1PA7:L1:LINE	-	4.724563271349476	chr11	40135753	41481323	-	LRRC4C	-0.7532740929338219	1
SRR9292621	chr11	83223566	83229707	L1PA4:L1:LINE	-	4.22074092204567	chr11	83166055	85338966	-	DLG2	-1.3149230924782693	2
SRR9292621	chr11	132190054	132196077	L1PA4:L1:LINE	+	4.378264073155898	chr11	131240373	132206716	+	NTM	2.4986763460744887	NA
SRR9292621	chr11	132626675	132633167	L1PA7:L1:LINE	-	4.224294289525064	chr11	132284871	133402414	-	OPCML	-2.350278060642151	NA
SRR9292621	chr14	67169341	67174507	L1PA8A:L1:LINE	+	6.40607161741413	chr14	66974125	67648520	+	GPHN	-1.7960066035961155	2
SRR9292621	chr15	31919293	31925475	L1PA4:L1:LINE	-	4.104767635226577	chr15	31775329	32162992	-	OTUD7A	0.5078247714481208	2
SRR9292621	chr17	49973441	49978975	L1PA15:L1:LINE	-	5.091812989260496	chr17	49707674	50237377	-	CA10	-1.5381975363807474	NA
SRR9292621	chr17	59187590	59193599	L1PA2:L1:LINE	+	4.455792650848637	chr17	58754814	59470199	+	BCAS3	-0.11911663080277243	NA
SRR9292621	chr18	3695243	3700586	L1PA7:L1:LINE	-	3.0029169339393738	chr18	3496030	4455335	-	DLGAP1	-2.5011909826943595	2
SRR9292621	chr19	30043256	30048324	L1PA7:L1:LINE	+	3.7359300828212967	chr19	30017406	30055386	+	VSTM2B	1.6228310278221019	NA
SRR9292621	chr19	44473800	44478910	L1PA11:L1:LINE	+	4.289650365090076	chr19	44472014	44502477	+	ZNF155	1.8704356272263685	NA
SRR9292621	chr2	40459740	40465767	L1PA2:L1:LINE	-	3.1940109706058215	chr2	40324410	40838193	-	SLC8A1	-0.42295680490127563	NA
SRR9292621	chr2	142199998	142206420	L1PA7:L1:LINE	-	4.660662745970285	chr2	140988992	142889270	-	LRP1B	-0.9121574852257194	NA
SRR9292621	chr2	149138172	149143692	L1PA4:L1:LINE	+	6.943354709689162	chr2	148778580	149275805	+	MBD5	-1.5091488964335702	1
SRR9292621	chr2	197386208	197392224	L1PA2:L1:LINE	-	4.533633827328488	chr2	197059094	197458416	-	HECW2	0.5100864938480368	2
SRR9292621	chr2	198882661	198889133	L1PA7:L1:LINE	+	3.3461834291998382	chr2	198669426	199437305	+	PLCL1	0.4944905880096177	NA
SRR9292621	chr2	210352719	210359164	L1PA7:L1:LINE	+	6.975559826766389	chr2	210288782	210598842	+	MAP2	-1.7426976701677859	NA
SRR9292621	chr3	21596708	21603100	L1PA7:L1:LINE	-	4.036191156214561	chr3	21459915	22414812	-	ZNF385D	-2.0132005703743188	NA
SRR9292621	chr3	51236479	51242602	L1PA3:L1:LINE	+	4.795188585360813	chr3	50712672	51421629	+	DOCK3	-1.5125563884289723	NA
SRR9292621	chr3	85202221	85208004	L1PA3:L1:LINE	+	3.794044734983579	chr3	85008132	86123579	+	CADM2	-0.5307464640676255	3
SRR9292621	chr3	85339080	85345090	L1PA2:L1:LINE	+	3.8383853142057074	chr3	85008132	86123579	+	CADM2	-0.5307464640676255	3
SRR9292621	chr3	115922232	115928273	L1PA2:L1:LINE	-	4.42484366086688	chr3	115521235	117716095	-	LSAMP	-0.6147836732813323	NA
SRR9292621	chr3	118720317	118726337	L1PA2:L1:LINE	-	3.456452490707112	chr3	118619404	118864915	-	IGSF11	1.2944217876781372	NA
SRR9292621	chr3	150959560	150965560	L1PA2:L1:LINE	+	4.033639426712854	chr3	150803484	151154860	+	MED12L	-1.2593494185013616	S
SRR9292621	chr3	159140855	159146997	L1PA3:L1:LINE	+	3.549372303764327	chr3	158680024	159615155	+	IQCJ-SCHIP1	0.6771192477862819	NA
SRR9292621	chr3	159208911	159215050	L1PA4:L1:LINE	+	5.340070758150811	chr3	158680024	159615155	+	IQCJ-SCHIP1	0.6771192477862819	NA
SRR9292621	chr4	21771611	21778019	L1PA8A:L1:LINE	-	4.930227037852362	chr4	20730239	21950422	-	KCNIP4	-3.0231081916159432	NA
SRR9292621	chr4	86991543	86997572	L1PA2:L1:LINE	-	4.363764913785877	chr4	86936276	87515284	-	MAPK10	-2.0159596744237125	NA
SRR9292621	chr4	87108935	87115354	L1PA7:L1:LINE	-	6.929253623797171	chr4	86936276	87515284	-	MAPK10	-2.0159596744237125	NA
SRR9292621	chr5	88089473	88095205	L1PA7:L1:LINE	-	4.959177419828503	chr5	88013975	88199922	-	MEF2C	-1.958073716466043	1
SRR9292621	chr5	129343000	129348122	L1PA15:L1:LINE	+	5.43457028776876	chr5	129240165	129522327	+	CHSY3	-1.7558208861351436	NA
SRR9292621	chr5	138341143	138347175	L1PA2:L1:LINE	-	3.5756378964714606	chr5	138282409	138629246	-	SIL1	-0.4464659236708501	NA
SRR9292621	chr5	139895099	139900527	L1PA3:L1:LINE	+	6.6694938460520765	chr5	139781399	139929163	+	ANKHD1	4.939064329549698	NA
SRR9292621	chr5	139895099	139900527	L1PA3:L1:LINE	+	6.6694938460520765	chr5	139781493	139929154	+	ANKHD1-EIF4EBP3	5.022661318344221	NA
SRR9292621	chr7	69662314	69668343	L1HS:L1:LINE	+	4.6976226423772935	chr7	69063905	70258054	+	AUTS2	1.3734810098903079	1
SRR9292621	chr7	78859110	78865127	L1PA2:L1:LINE	-	5.76382014200273	chr7	77646393	79082890	-	MAGI2	-1.2085867686336096	NA
SRR9292621	chr8	4426645	4432101	L1PA7:L1:LINE	-	5.732127365531336	chr8	2792875	4852494	-	CSMD1	-0.8594286875014132	3
SRR9292621	chr8	107572952	107579352	L1PA7:L1:LINE	+	4.862574048084234	chr8	107282473	107764922	+	OXR1	-2.7717037004339797	NA
SRR9292621	chr9	19536198	19542228	L1PA2:L1:LINE	-	3.135159408770833	chr9	19507450	19786926	-	SLC24A2	0.06260975062814923	3
SRR9292621	chr9	19762111	19767759	L1PA7:L1:LINE	-	3.070686046430842	chr9	19507450	19786926	-	SLC24A2	0.06260975062814923	3
SRR9292621	chrX	91274767	91281191	L1PA13:L1:LINE	+	3.5263834301973	chrX	91034260	91878229	+	PCDH11X	-0.7921378201923058	3

## Sheet: Table S15. Velmeshev ACC FL L1 - host gene correlation
L1	Gene	r_value	p_value	fdr
chr1|92853959|92860042|L1PA7:L1:LINE|80|+	RPAP2	0.409321	0.0916482	0.137472
chr1|116594534|116600673|L1PA3:L1:LINE|40|+	SLC22A15	0.649851	0.00350897	0.0101058
chr1|149923964|149930070|L1PA5:L1:LINE|59|-	OTUD7B	0.931591	1.943e-08	6.99479e-07
chr1|211127241|211133387|L1PA6:L1:LINE|73|-	KCNH1	-0.75047	0.000333269	0.00141149
chr1|220814954|220821404|L1PA10:L1:LINE|100|+	MARK1	-0.540005	0.0207058	0.0414116
chr1|237238564|237244593|L1HS:L1:LINE|6|+	RYR2	-0.371086	0.129495	0.1793
chr1|237983521|237989950|L1PA7:L1:LINE|92|+	RYR2	0.639794	0.00424339	0.0113157
chr10|49580263|49585413|L1PA7:L1:LINE|83|+	MAPK8	-0.735972	0.000497916	0.0017925
chr10|93263020|93269044|L1PA2:L1:LINE|26|+	HECTD2	-0.262507	0.292632	0.362463
chr11|14799221|14805319|L1PA5:L1:LINE|69|+	PDE3B	0.937211	9.964e-09	6.99479e-07
chr11|40866705|40873141|L1PA7:L1:LINE|104|-	LRRC4C	-0.196709	0.434014	0.488265
chr11|83223566|83229707|L1PA4:L1:LINE|54|-	DLG2	-0.475654	0.0460275	0.0808287
chr11|113094669|113100816|L1PA5:L1:LINE|55|+	NCAM1	0.0469328	0.853288	0.877668
chr11|132190054|132196077|L1PA4:L1:LINE|30|+	NTM	0.79792	7.25399e-05	0.000401759
chr11|132626675|132633167|L1PA7:L1:LINE|94|-	OPCML	-0.808038	4.977e-05	0.00029862
chr12|4781112|4787459|L1PA7:L1:LINE|89|+	NDUFA9	0.788565	0.000100928	0.000519058
chr12|46583731|46589869|L1PA6:L1:LINE|83|-	SLC38A1	0.530991	0.023366	0.0442724
chr12|78047744|78053902|L1PA3:L1:LINE|35|+	NAV3	-0.39666	0.103157	0.148546
chr13|36582366|36588374|L1PA2:L1:LINE|14|-	DCLK1	-0.850315	7.83555e-06	6.26844e-05
chr13|49039691|49045702|L1HS:L1:LINE|7|+	RB1	0.650922	0.00343729	0.0101058
chr14|32929548|32935960|L1PA8:L1:LINE|114|+	AKAP6	-0.548688	0.0183742	0.0377983
chr14|67169341|67174507|L1PA8A:L1:LINE|110|+	GPHN	-0.1882	0.454542	0.495864
chr15|28399917|28406027|L1PA5:L1:LINE|57|-	HERC2	0.831928	1.86231e-05	0.000121897
chr15|31919293|31925475|L1PA4:L1:LINE|43|-	OTUD7A	-0.100171	0.692491	0.722599
chr15|63909208|63914241|L1PA4:L1:LINE|37|-	HERC1	0.190764	0.448304	0.495864
chr17|49973441|49978975|L1PA15:L1:LINE|150|-	CA10	-0.624141	0.00563244	0.0130818
chr17|59187590|59193599|L1PA2:L1:LINE|21|+	BCAS3	-0.587456	0.0103615	0.0226069
chr18|3695243|3700586|L1PA7:L1:LINE|88|-	DLGAP1	-0.8435	1.09381e-05	7.87545e-05
chr18|60573525|60579547|L1HS:L1:LINE|5|+	PHLPP1	0.879885	1.48492e-06	2.13828e-05
chr19|30043256|30048324|L1PA7:L1:LINE|82|+	VSTM2B	-0.288385	0.245829	0.316065
chr19|40543822|40549961|L1PA4:L1:LINE|38|-	ZNF780B	-0.289508	0.243911	0.316065
chr19|44473800|44478910|L1PA11:L1:LINE|109|+	ZNF155	0.598812	0.00864496	0.0194512
chr2|24318027|24324128|L1PA6:L1:LINE|63|+	FAM228B	0.416707	0.0853815	0.130797
chr2|40459740|40465767|L1PA2:L1:LINE|27|-	SLC8A1	-0.629744	0.00509817	0.0122356
chr2|142199998|142206420|L1PA7:L1:LINE|102|-	LRP1B	-0.102827	0.684731	0.722599
chr2|149138172|149143692|L1PA4:L1:LINE|45|+	MBD5	-0.426475	0.0775803	0.12143
chr2|197386208|197392224|L1PA2:L1:LINE|19|-	HECW2	-0.244059	0.329072	0.388412
chr2|198882661|198889133|L1PA7:L1:LINE|89|+	PLCL1	0.460382	0.0545328	0.0905307
chr2|210352719|210359164|L1PA7:L1:LINE|93|+	MAP2	-0.657678	0.00301243	0.00943021
chr3|15433014|15439121|L1PA4:L1:LINE|51|-	METTL6	-0.467388	0.0504956	0.0865639
chr3|21596708|21603100|L1PA7:L1:LINE|97|-	ZNF385D	-0.129646	0.608142	0.653526
chr3|51236479|51242602|L1PA3:L1:LINE|35|+	DOCK3	-0.746052	0.000377681	0.00150138
chr3|85202221|85208004|L1PA3:L1:LINE|34|+	CADM2	-0.26836	0.281604	0.35571
chr3|85339080|85345090|L1PA2:L1:LINE|31|+	CADM2	-0.232701	0.352766	0.403161
chr3|108374358|108380495|L1PA4:L1:LINE|47|+	DZIP3	0.397216	0.10263	0.148546
chr3|115922232|115928273|L1PA2:L1:LINE|26|-	LSAMP	0.391678	0.107957	0.15241
chr3|118720317|118726337|L1PA2:L1:LINE|16|-	IGSF11	0.564569	0.0146487	0.0310207
chr3|120886334|120892170|L1PA7:L1:LINE|96|+	STXBP5L	-0.0115099	0.963846	0.963846
chr3|150959560|150965560|L1PA2:L1:LINE|27|+	MED12L	-0.245346	0.326448	0.388412
chr3|159140855|159146997|L1PA3:L1:LINE|39|+	IQCJ-SCHIP1	-0.458999	0.0553576	0.0905307
chr3|159208911|159215050|L1PA4:L1:LINE|49|+	IQCJ-SCHIP1	-0.498877	0.035073	0.0631314
chr4|21771611|21778019|L1PA8A:L1:LINE|126|-	KCNIP4	-0.692787	0.00143723	0.00492764
chr4|86991543|86997572|L1PA2:L1:LINE|22|-	MAPK10	-0.756275	0.000281661	0.00126747
chr4|87108935|87115354|L1PA7:L1:LINE|100|-	MAPK10	-0.778799	0.000140094	0.000672449
chr4|88404240|88410700|L1PA7:L1:LINE|95|-	SPARCL1	0.6715	0.00227669	0.00745097
chr5|88089473|88095205|L1PA7:L1:LINE|92|-	MEF2C	-0.456975	0.0565817	0.0905307
chr5|129343000|129348122|L1PA15:L1:LINE|183|+	CHSY3	-0.744339	0.000396197	0.00150138
chr5|136753492|136759608|L1PA4:L1:LINE|54|-	SPOCK1	-0.260216	0.297019	0.362463
chr5|138341143|138347175|L1PA2:L1:LINE|16|-	SIL1	-0.511845	0.0298997	0.0551994
chr5|139895099|139900527|L1PA3:L1:LINE|27|+	ANKHD1	0.870803	2.58232e-06	3.09878e-05
chr5|139895099|139900527|L1PA3:L1:LINE|27|+	ANKHD1-EIF4EBP3	0.879969	1.47701e-06	2.13828e-05
chr7|69662314|69668343|L1HS:L1:LINE|3|+	AUTS2	0.645637	0.00380284	0.0105309
chr7|78859110|78865127|L1PA2:L1:LINE|21|-	MAGI2	-0.0199526	0.937365	0.950568
chr8|4426645|4432101|L1PA7:L1:LINE|115|-	CSMD1	-0.533962	0.0224612	0.0437082
chr8|91057493|91063412|L1PA5:L1:LINE|70|+	DECR1	0.891498	6.83742e-07	1.64098e-05
chr8|107572952|107579352|L1PA7:L1:LINE|96|+	OXR1	-0.861921	4.26891e-06	4.00925e-05
chr9|8324107|8330317|L1PA7:L1:LINE|119|-	PTPRD	0.861139	4.45472e-06	4.00925e-05
chr9|19536198|19542228|L1PA2:L1:LINE|11|-	SLC24A2	0.363158	0.138538	0.188202
chr9|19762111|19767759|L1PA7:L1:LINE|101|-	SLC24A2	0.359372	0.143007	0.190676
chr9|72049710|72055847|L1PA4:L1:LINE|45|-	APBA1	0.630553	0.00502461	0.0122356
chrX|11940621|11946326|L1PA13:L1:LINE|121|+	FRMPD4	-0.631899	0.00490404	0.0122356
chrX|91274767|91281191|L1PA13:L1:LINE|113|+	PCDH11X	-0.235014	0.347865	0.403161

## Sheet: Table S16. Velmeshev PFC FL L1 - host gene correlation
L1	Gene	r_value	p_value	fdr
chr1|92853959|92860042|L1PA7:L1:LINE|80|+	RPAP2	-0.12255	0.577487	0.653034
chr1|116594534|116600673|L1PA3:L1:LINE|40|+	SLC22A15	-0.00217052	0.992158	0.992158
chr1|149923964|149930070|L1PA5:L1:LINE|59|-	OTUD7B	0.875493	4.51917e-08	1.0846e-06
chr1|211127241|211133387|L1PA6:L1:LINE|73|-	KCNH1	-0.731927	7.19887e-05	0.000259159
chr1|220814954|220821404|L1PA10:L1:LINE|100|+	MARK1	0.12612	0.566362	0.653034
chr1|237238564|237244593|L1HS:L1:LINE|6|+	RYR2	-0.45355	0.0297302	0.0535144
chr1|237983521|237989950|L1PA7:L1:LINE|92|+	RYR2	0.843551	4.29019e-07	6.17787e-06
chr10|49580263|49585413|L1PA7:L1:LINE|83|+	MAPK8	-0.628197	0.00132827	0.00341556
chr10|93263020|93269044|L1PA2:L1:LINE|26|+	HECTD2	0.641127	0.000978605	0.00270998
chr11|14799221|14805319|L1PA5:L1:LINE|69|+	PDE3B	0.765038	2.11754e-05	8.47015e-05
chr11|40866705|40873141|L1PA7:L1:LINE|104|-	LRRC4C	-0.259309	0.232157	0.298487
chr11|83223566|83229707|L1PA4:L1:LINE|54|-	DLG2	-0.312148	0.147045	0.207593
chr11|113094669|113100816|L1PA5:L1:LINE|55|+	NCAM1	-0.0373416	0.865674	0.903312
chr11|132190054|132196077|L1PA4:L1:LINE|30|+	NTM	0.4024	0.0569632	0.0892715
chr11|132626675|132633167|L1PA7:L1:LINE|94|-	OPCML	-0.789531	7.49431e-06	4.49658e-05
chr12|4781112|4787459|L1PA7:L1:LINE|89|+	NDUFA9	0.774936	1.41318e-05	6.78327e-05
chr12|46583731|46589869|L1PA6:L1:LINE|83|-	SLC38A1	0.805542	3.52293e-06	2.81834e-05
chr12|78047744|78053902|L1PA3:L1:LINE|35|+	NAV3	-0.411739	0.0509265	0.0833343
chr13|36582366|36588374|L1PA2:L1:LINE|14|-	DCLK1	-0.761515	2.434e-05	9.22359e-05
chr13|49039691|49045702|L1HS:L1:LINE|7|+	RB1	0.402294	0.0570346	0.0892715
chr14|32929548|32935960|L1PA8:L1:LINE|114|+	AKAP6	-0.771068	1.65902e-05	7.46559e-05
chr14|67169341|67174507|L1PA8A:L1:LINE|110|+	GPHN	-0.214649	0.325342	0.403872
chr15|28399917|28406027|L1PA5:L1:LINE|57|-	HERC2	0.926683	2.19207e-10	7.89144e-09
chr15|31919293|31925475|L1PA4:L1:LINE|43|-	OTUD7A	-0.47417	0.0222615	0.0429484
chr15|63909208|63914241|L1PA4:L1:LINE|37|-	HERC1	0.720676	0.000104906	0.00034333
chr17|49973441|49978975|L1PA15:L1:LINE|150|-	CA10	-0.286189	0.185548	0.252065
chr17|59187590|59193599|L1PA2:L1:LINE|21|+	BCAS3	-0.778582	1.21144e-05	6.23024e-05
chr18|3695243|3700586|L1PA7:L1:LINE|88|-	DLGAP1	-0.814585	2.22985e-06	2.00686e-05
chr18|60573525|60579547|L1HS:L1:LINE|5|+	PHLPP1	0.72206	0.000100254	0.00034333
chr19|30043256|30048324|L1PA7:L1:LINE|82|+	VSTM2B	0.471272	0.0232087	0.0429484
chr19|40543822|40549961|L1PA4:L1:LINE|38|-	ZNF780B	-0.121596	0.580475	0.653034
chr19|44473800|44478910|L1PA11:L1:LINE|109|+	ZNF155	0.366686	0.0852447	0.127867
chr2|24318027|24324128|L1PA6:L1:LINE|63|+	FAM228B	0.206451	0.344596	0.413515
chr2|40459740|40465767|L1PA2:L1:LINE|27|-	SLC8A1	-0.66338	0.000559406	0.00167822
chr2|142199998|142206420|L1PA7:L1:LINE|102|-	LRP1B	-0.283574	0.189776	0.253035
chr2|149138172|149143692|L1PA4:L1:LINE|45|+	MBD5	-0.59935	0.00250782	0.00601878
chr2|197386208|197392224|L1PA2:L1:LINE|19|-	HECW2	-0.608413	0.00206725	0.00513248
chr2|198882661|198889133|L1PA7:L1:LINE|89|+	PLCL1	-0.471107	0.0232637	0.0429484
chr2|210352719|210359164|L1PA7:L1:LINE|93|+	MAP2	-0.658076	0.000641773	0.0018483
chr3|15433014|15439121|L1PA4:L1:LINE|51|-	METTL6	-0.289304	0.180596	0.250056
chr3|21596708|21603100|L1PA7:L1:LINE|97|-	ZNF385D	0.0461656	0.834318	0.896581
chr3|51236479|51242602|L1PA3:L1:LINE|35|+	DOCK3	-0.766241	2.01802e-05	8.47015e-05
chr3|85202221|85208004|L1PA3:L1:LINE|34|+	CADM2	-0.528933	0.00945791	0.0200285
chr3|85339080|85345090|L1PA2:L1:LINE|31|+	CADM2	-0.561529	0.00530157	0.0119285
chr3|108374358|108380495|L1PA4:L1:LINE|47|+	DZIP3	0.100874	0.646975	0.71665
chr3|115922232|115928273|L1PA2:L1:LINE|26|-	LSAMP	-0.170397	0.436963	0.515759
chr3|118720317|118726337|L1PA2:L1:LINE|16|-	IGSF11	0.0149376	0.946067	0.959392
chr3|120886334|120892170|L1PA7:L1:LINE|96|+	STXBP5L	0.442769	0.0343614	0.060342
chr3|150959560|150965560|L1PA2:L1:LINE|27|+	MED12L	-0.388857	0.0666784	0.102146
chr3|159140855|159146997|L1PA3:L1:LINE|39|+	IQCJ-SCHIP1	-0.0310592	0.888122	0.913497
chr3|159208911|159215050|L1PA4:L1:LINE|49|+	IQCJ-SCHIP1	-0.0385127	0.8615	0.903312
chr4|21771611|21778019|L1PA8A:L1:LINE|126|-	KCNIP4	-0.252769	0.244564	0.308923
chr4|86991543|86997572|L1PA2:L1:LINE|22|-	MAPK10	-0.802569	4.07377e-06	2.93312e-05
chr4|87108935|87115354|L1PA7:L1:LINE|100|-	MAPK10	-0.632041	0.00121465	0.00323907
chr4|88404240|88410700|L1PA7:L1:LINE|95|-	SPARCL1	0.574938	0.00410703	0.00953891
chr5|88089473|88095205|L1PA7:L1:LINE|92|-	MEF2C	-0.430831	0.0401363	0.067205
chr5|129343000|129348122|L1PA15:L1:LINE|183|+	CHSY3	-0.780822	1.10052e-05	6.09519e-05
chr5|136753492|136759608|L1PA4:L1:LINE|54|-	SPOCK1	-0.343841	0.108172	0.158946
chr5|138341143|138347175|L1PA2:L1:LINE|16|-	SIL1	0.0661467	0.764279	0.833759
chr5|139895099|139900527|L1PA3:L1:LINE|27|+	ANKHD1	0.821882	1.51381e-06	1.55706e-05
chr5|139895099|139900527|L1PA3:L1:LINE|27|+	ANKHD1-EIF4EBP3	0.825693	1.228e-06	1.4736e-05
chr7|69662314|69668343|L1HS:L1:LINE|3|+	AUTS2	0.209748	0.336773	0.410977
chr7|78859110|78865127|L1PA2:L1:LINE|21|-	MAGI2	-0.529297	0.00939979	0.0200285
chr8|4426645|4432101|L1PA7:L1:LINE|115|-	CSMD1	-0.51835	0.0112799	0.0225597
chr8|91057493|91063412|L1PA5:L1:LINE|70|+	DECR1	0.799233	4.78115e-06	3.12948e-05
chr8|107572952|107579352|L1PA7:L1:LINE|96|+	OXR1	-0.928988	1.58363e-10	7.89144e-09
chr9|8324107|8330317|L1PA7:L1:LINE|119|-	PTPRD	0.843969	4.1795e-07	6.17787e-06
chr9|19536198|19542228|L1PA2:L1:LINE|11|-	SLC24A2	-0.432578	0.0392466	0.067205
chr9|19762111|19767759|L1PA7:L1:LINE|101|-	SLC24A2	-0.334066	0.11925	0.17172
chr9|72049710|72055847|L1PA4:L1:LINE|45|-	APBA1	0.524122	0.0102534	0.0210927
chrX|11940621|11946326|L1PA13:L1:LINE|121|+	FRMPD4	-0.70971	0.000148917	0.000466175
chrX|91274767|91281191|L1PA13:L1:LINE|113|+	PCDH11X	-0.272379	0.208618	0.2731

## Sheet: Table S17. Deneault iPSC FL L1 - host gene correlation
L1	Gene	r_value	p_value	fdr
chr12|105401334|105407760|L1PA7:L1:LINE|84|-	C12orf45	0.915901	1.89519e-17	8.71786e-16
chr8|11672377|11678511|L1PA6:L1:LINE|85|-	FDFT1	0.916941	1.4921e-17	8.71786e-16
chr20|44100759|44107254|L1PA13:L1:LINE|94|-	WFDC2	0.890513	2.91554e-15	8.94098e-14
chr19|12017069|12022645|L1PA5:L1:LINE|58|+	ZNF69	0.877025	2.61744e-14	6.02012e-13
chr4|167664640|167670800|L1PA5:L1:LINE|75|+	SPOCK3	0.870187	7.23387e-14	1.33103e-12
chr14|55414793|55420840|L1PA5:L1:LINE|63|+	WDHD1	0.864898	1.52809e-13	2.34308e-12
chr19|20990530|20996633|L1PA3:L1:LINE|48|+	ZNF66	0.848494	1.28991e-12	1.69531e-11
chr6|76609458|76615462|L1PA3:L1:LINE|32|-	MYO6	0.838234	4.32805e-12	4.97725e-11
chr6|18228620|18234510|L1PA5:L1:LINE|62|+	DEK	0.837138	4.90115e-12	5.01007e-11
chr11|82977176|82983297|L1PA6:L1:LINE|63|+	CCDC90B	0.822553	2.36145e-11	2.17253e-10
chr4|87645970|87652087|L1PA6:L1:LINE|74|-	PTPN13	0.814824	5.13339e-11	4.29338e-10
chr3|134971056|134977072|L1PA2:L1:LINE|26|-	EPHB1	0.806699	1.11812e-10	8.57222e-10
chr4|128638142|128644524|L1PA10:L1:LINE|104|-	INTU	0.804103	1.42291e-10	1.00699e-09
chr5|74002130|74008268|L1PA3:L1:LINE|34|+	HEXB	0.79925	2.21194e-10	1.45356e-09
chr1|92853959|92860042|L1PA7:L1:LINE|80|+	RPAP2	0.7775	1.39242e-09	8.5402e-09
chr5|77414039|77420179|L1PA4:L1:LINE|39|+	AP3B1	0.775626	1.61584e-09	9.29108e-09
chr10|33201104|33207283|L1PA5:L1:LINE|66|+	ITGB1	0.760829	4.99102e-09	2.70102e-08
chr12|4781112|4787459|L1PA7:L1:LINE|89|+	NDUFA9	0.753306	8.58976e-09	4.39032e-08
chr6|144172713|144178208|L1PA7:L1:LINE|83|-	LTV1	0.70383	1.99561e-07	9.66297e-07
chr11|113094669|113100816|L1PA5:L1:LINE|55|+	NCAM1	0.676389	8.79884e-07	4.04747e-06
chr2|71638604|71644631|L1HS:L1:LINE|6|-	ZNF638	0.662725	1.74018e-06	7.62365e-06
chr8|91057493|91063412|L1PA5:L1:LINE|70|+	DECR1	0.649392	3.27638e-06	1.37012e-05
chr11|77037749|77042841|L1PA4:L1:LINE|37|+	PAK1	0.642043	4.5838e-06	1.83352e-05
chr2|95758488|95764597|L1PA6:L1:LINE|63|+	MRPS5	0.63427	6.47689e-06	2.29182e-05
chr3|108374358|108380495|L1PA4:L1:LINE|47|+	DZIP3	0.63515	6.23124e-06	2.29182e-05
chr9|8324107|8330317|L1PA7:L1:LINE|119|-	PTPRD	0.634349	6.45434e-06	2.29182e-05
chrY|14959405|14965588|L1PA6:L1:LINE|82|-	USP9Y	0.613859	1.53684e-05	5.23665e-05
chr7|138215994|138222113|L1PA5:L1:LINE|64|-	TRIM24	0.600682	2.60174e-05	8.54858e-05
chr1|117517360|117523487|L1PA5:L1:LINE|60|+	PTGFRN	0.581243	5.42822e-05	0.000172206
chr8|103329168|103335319|L1PA3:L1:LINE|35|+	UBR5	0.572362	7.4801e-05	0.00022939
chr15|90177549|90183532|L1PA3:L1:LINE|29|+	KIF7	0.557757	0.000124281	0.000364562
chr20|33659086|33665195|L1PA5:L1:LINE|64|-	TRPC4AP	0.557165	0.000126804	0.000364562
chrX|130712654|130718709|L1PA2:L1:LINE|25|+	IGSF1	-0.540666	0.000218638	0.000609537
chr13|77773162|77779196|L1PA3:L1:LINE|29|+	MYCBP2	0.530172	0.000304761	0.000824647
chr7|17846287|17852748|L1PA7:L1:LINE|96|+	SNX13	0.528132	0.000324678	0.000853439
chr13|111321942|111328064|L1PA5:L1:LINE|58|+	CARS2	0.520651	0.000408138	0.00104302
chr1|100665158|100671644|L1PA7:L1:LINE|78|+	DBT	0.516325	0.00046475	0.0011556
chr1|220814954|220821404|L1PA10:L1:LINE|100|+	MARK1	0.504647	0.000654355	0.00158423
chr2|24318027|24324128|L1PA6:L1:LINE|63|+	FAM228B	-0.502895	0.000688098	0.00162321
chr18|60573525|60579547|L1HS:L1:LINE|5|+	PHLPP1	0.487286	0.00106457	0.00244851
chr7|39047127|39053152|L1PA2:L1:LINE|23|-	POU6F2	0.481931	0.00123072	0.00276161
chr15|28399917|28406027|L1PA5:L1:LINE|57|-	HERC2	0.477028	0.00140265	0.00307246
chr19|40543822|40549961|L1PA4:L1:LINE|38|-	ZNF780B	0.459315	0.00221448	0.00473795
chr13|49039691|49045702|L1HS:L1:LINE|7|+	RB1	0.449408	0.00282949	0.00591621
chr11|102239897|102245923|L1PA2:L1:LINE|22|-	BIRC2	0.443652	0.0032518	0.00664812
chr11|96138784|96144829|L1PA2:L1:LINE|18|-	JRKL	0.417224	0.00597911	0.0119582
chr12|46583731|46589869|L1PA6:L1:LINE|83|-	SLC38A1	0.406146	0.00761196	0.0142593
chr15|63909208|63914241|L1PA4:L1:LINE|37|-	HERC1	0.405687	0.00768728	0.0142593
chr6|91271827|91277941|L1PA5:L1:LINE|62|+	MAP3K7	0.40531	0.0077496	0.0142593
chr7|131000000|131006360|L1PA8:L1:LINE|97|+	MKLN1	0.407587	0.00737995	0.0142593
chr1|171519607|171525696|L1PA6:L1:LINE|67|-	PRRC2C	0.39048	0.0105692	0.0190661
chr1|149923964|149930070|L1PA5:L1:LINE|59|-	OTUD7B	0.377208	0.0137957	0.0244077
chr1|172560414|172566554|L1PA5:L1:LINE|67|-	SUCO	0.374989	0.0144094	0.0250125
chr4|20740248|20746401|L1PA5:L1:LINE|71|+	PACRGL	0.364467	0.0176442	0.0300605
chr19|44473800|44478910|L1PA11:L1:LINE|109|+	ZNF155	0.351113	0.0226119	0.0371481
chr2|197770311|197776343|L1HS:L1:LINE|4|+	PGAP1	0.351287	0.0225403	0.0371481
chr16|18832575|18838378|L1HS:L1:LINE|4|-	SMG1	0.349236	0.0233958	0.0377617
chr3|51681874|51687951|L1PA6:L1:LINE|64|+	RAD54L2	0.346027	0.0247887	0.0393201
chr16|50377250|50383321|L1PA5:L1:LINE|62|+	BRD7	0.329849	0.0329035	0.0513071
chr15|102166653|102172678|L1PA2:L1:LINE|24|+	TM2D3	-0.324089	0.0362748	0.0556214
chr12|4618061|4624067|L1PA2:L1:LINE|18|+	C12orf4	0.31078	0.0451547	0.06693
chr12|96709720|96715749|L1PA2:L1:LINE|13|+	CDK17	-0.310002	0.0457235	0.06693
chr8|43038791|43044885|L1PA5:L1:LINE|64|-	HGSNAT	0.309854	0.0458325	0.06693
chr12|48068016|48073191|L1PA6:L1:LINE|65|+	RPAP3	0.307449	0.0476326	0.0674184
chr3|43607314|43613339|L1PA2:L1:LINE|25|+	ANO10	0.308287	0.0469992	0.0674184
chr12|29475994|29481840|L1PA4:L1:LINE|43|+	FAR2	0.289195	0.0632333	0.0881434
chr5|77748008|77754033|L1PA2:L1:LINE|22|-	SCAMP1	-0.268944	0.0850244	0.11675
chr11|11906779|11912696|L1PA10:L1:LINE|114|+	USP47	0.238101	0.128905	0.171874
chr2|118681259|118686848|L1PA4:L1:LINE|53|+	CCDC93	0.238521	0.128211	0.171874
chr14|20748206|20754353|L1PA4:L1:LINE|46|+	TTC5	0.199842	0.204481	0.264979
chr3|58827880|58833905|L1PA2:L1:LINE|19|+	C3orf67	0.198961	0.206527	0.264979
chr9|70450620|70456693|L1PA3:L1:LINE|28|+	CBWD5	-0.198597	0.207375	0.264979
chr9|94976690|94982694|L1PA2:L1:LINE|24|+	IARS	0.1852	0.240314	0.302861
chr20|8575748|8581774|L1PA2:L1:LINE|19|-	PLCB1	-0.181208	0.250779	0.31178
chr15|56426816|56432826|L1PA2:L1:LINE|28|-	RFX7	0.169453	0.283351	0.347577
chr1|180835947|180841979|L1HS:L1:LINE|5|-	XPR1	-0.166533	0.29185	0.353292
chr11|14616306|14622422|L1PA6:L1:LINE|66|-	PSMA1	-0.16098	0.308466	0.368557
chr5|150122399|150128512|L1PA3:L1:LINE|36|+	DCTN4	-0.157713	0.318516	0.375686
chr4|42043774|42050256|L1PA7:L1:LINE|86|+	SLC30A9	-0.153423	0.332023	0.386659
chr3|15433014|15439121|L1PA4:L1:LINE|51|-	METTL6	-0.133375	0.399756	0.459719
chr4|151192064|151198580|L1PA7:L1:LINE|84|+	LRBA	-0.131589	0.406154	0.461311
chr14|88922077|88928190|L1PA4:L1:LINE|59|-	SPATA7	0.108909	0.492362	0.552406
chr7|86669072|86675084|L1PA2:L1:LINE|26|+	KIAA1324L	-0.102315	0.519082	0.575368
chr11|108227658|108233694|L1PA2:L1:LINE|25|+	ATM	0.0929609	0.558181	0.611342
chr12|79433401|79439425|L1PA2:L1:LINE|26|-	SYT1	-0.0884927	0.577332	0.624877
chr17|58958801|58964835|L1PA2:L1:LINE|17|-	BCAS3	-0.0750774	0.63654	0.68095
chr2|170105133|170111166|L1HS:L1:LINE|5|+	LRP2	0.0729358	0.646216	0.683355
chrX|67744363|67750771|L1PA7:L1:LINE|82|-	YIPF6	0.0467854	0.768594	0.80353
chr11|108227658|108233694|L1PA2:L1:LINE|25|+	C11orf65	-0.0316461	0.842301	0.870694
chr6|79681232|79687246|L1PA3:L1:LINE|29|+	PHIP	0.0238659	0.880747	0.900319
chr5|139831619|139837446|L1PA5:L1:LINE|55|+	ANKHD1-EIF4EBP3	0.0193413	0.903236	0.913162
chr5|139831619|139837446|L1PA5:L1:LINE|55|+	ANKHD1	-0.0169998	0.914905	0.914905

## Sheet: Table S18. Deneault Neurons FL L1 - host gene correlation
L1	Gene	r_value	p_value	fdr
chr19|12017069|12022645|L1PA5:L1:LINE|58|+	ZNF69	0.963841	9.5676e-26	7.33278e-24
chr6|18228620|18234510|L1PA5:L1:LINE|62|+	DEK	0.963049	1.49649e-25	7.33278e-24
chr4|128638142|128644524|L1PA10:L1:LINE|104|-	INTU	0.955416	7.1673e-24	2.34132e-22
chr9|72049710|72055847|L1PA4:L1:LINE|45|-	APBA1	0.944074	7.48876e-22	1.83475e-20
chr1|92853959|92860042|L1PA7:L1:LINE|80|+	RPAP2	0.937332	7.6524e-21	1.49987e-19
chr4|87645970|87652087|L1PA6:L1:LINE|74|-	PTPN13	0.93663	9.59992e-21	1.56799e-19
chr18|60573525|60579547|L1HS:L1:LINE|5|+	PHLPP1	0.929619	8.11581e-20	1.13621e-18
chr12|105401334|105407760|L1PA7:L1:LINE|84|-	C12orf45	0.927173	1.62369e-19	1.76802e-18
chr8|63885234|63891726|L1PA7:L1:LINE|103|-	NKAIN3	0.927389	1.52866e-19	1.76802e-18
chr12|29475994|29481840|L1PA4:L1:LINE|43|+	FAR2	0.912278	6.97409e-18	6.21328e-17
chr19|20990530|20996633|L1PA3:L1:LINE|48|+	ZNF66	0.912522	6.59365e-18	6.21328e-17
chr13|49039691|49045702|L1HS:L1:LINE|7|+	RB1	0.904049	4.22314e-17	3.4489e-16
chr8|11672377|11678511|L1PA6:L1:LINE|85|-	FDFT1	0.894615	2.75417e-16	2.07622e-15
chr1|180835947|180841979|L1HS:L1:LINE|5|-	XPR1	0.893456	3.42497e-16	2.39748e-15
chr2|24318027|24324128|L1PA6:L1:LINE|63|+	FAM228B	0.892763	3.89722e-16	2.54619e-15
chr1|117517360|117523487|L1PA5:L1:LINE|60|+	PTGFRN	0.869072	2.02939e-14	1.243e-13
chr16|50377250|50383321|L1PA5:L1:LINE|62|+	BRD7	0.865883	3.25655e-14	1.87731e-13
chr15|90177549|90183532|L1PA3:L1:LINE|29|+	KIF7	0.861038	6.53108e-14	3.55581e-13
chr13|77773162|77779196|L1PA3:L1:LINE|29|+	MYCBP2	0.854051	1.70383e-13	8.78818e-13
chr20|33659086|33665195|L1PA5:L1:LINE|64|-	TRPC4AP	0.846653	4.46129e-13	2.18603e-12
chr7|138215994|138222113|L1PA5:L1:LINE|64|-	TRIM24	0.840243	9.87014e-13	4.60606e-12
chr16|18832575|18838378|L1HS:L1:LINE|4|-	SMG1	0.824261	6.19683e-12	2.7604e-11
chr14|55414793|55420840|L1PA5:L1:LINE|63|+	WDHD1	0.818314	1.17187e-11	4.99319e-11
chr4|151192064|151198580|L1PA7:L1:LINE|84|+	LRBA	0.802004	6.01002e-11	2.45409e-10
chr15|28399917|28406027|L1PA5:L1:LINE|57|-	HERC2	0.799581	7.56449e-11	2.96528e-10
chr19|44473800|44478910|L1PA11:L1:LINE|109|+	ZNF155	0.787938	2.19045e-10	8.25631e-10
chr10|33201104|33207283|L1PA5:L1:LINE|66|+	ITGB1	0.777476	5.39001e-10	1.95637e-09
chr5|139831619|139837446|L1PA5:L1:LINE|55|+	ANKHD1	0.766014	1.36978e-09	4.79423e-09
chr5|139831619|139837446|L1PA5:L1:LINE|55|+	ANKHD1-EIF4EBP3	0.76441	1.55423e-09	5.25222e-09
chr19|40543822|40549961|L1PA4:L1:LINE|38|-	ZNF780B	0.732881	1.54703e-08	5.05363e-08
chr1|149923964|149930070|L1PA5:L1:LINE|59|-	OTUD7B	0.721632	3.25465e-08	1.02889e-07
chr2|95758488|95764597|L1PA6:L1:LINE|63|+	MRPS5	0.697607	1.42177e-07	4.35418e-07
chr14|20748206|20754353|L1PA4:L1:LINE|46|+	TTC5	0.69503	1.65138e-07	4.90409e-07
chr8|91057493|91063412|L1PA5:L1:LINE|70|+	DECR1	0.693637	1.78942e-07	5.15775e-07
chr8|43038791|43044885|L1PA5:L1:LINE|64|-	HGSNAT	0.679987	3.84013e-07	1.07524e-06
chr4|21771611|21778019|L1PA8A:L1:LINE|126|-	KCNIP4	0.67768	4.35183e-07	1.18466e-06
chr3|58827880|58833905|L1PA2:L1:LINE|19|+	C3orf67	0.671187	6.15196e-07	1.62944e-06
chr12|46583731|46589869|L1PA6:L1:LINE|83|-	SLC38A1	0.668566	7.05736e-07	1.82005e-06
chr2|71638604|71644631|L1HS:L1:LINE|6|-	ZNF638	0.660321	1.07764e-06	2.70791e-06
chr5|77414039|77420179|L1PA4:L1:LINE|39|+	AP3B1	0.659193	1.14074e-06	2.79482e-06
chr3|108374358|108380495|L1PA4:L1:LINE|47|+	DZIP3	0.652757	1.57122e-06	3.7556e-06
chr11|102239897|102245923|L1PA2:L1:LINE|22|-	BIRC2	0.641293	2.72858e-06	6.36668e-06
chr9|94976690|94982694|L1PA2:L1:LINE|24|+	IARS	0.626981	5.269e-06	1.20084e-05
chr2|118681259|118686848|L1PA4:L1:LINE|53|+	CCDC93	0.615581	8.69586e-06	1.92415e-05
chr3|134971056|134977072|L1PA2:L1:LINE|26|-	EPHB1	0.615211	8.83541e-06	1.92415e-05
chr13|111321942|111328064|L1PA5:L1:LINE|58|+	CARS2	0.603623	1.44066e-05	3.06923e-05
chr15|63909208|63914241|L1PA4:L1:LINE|37|-	HERC1	0.597561	1.84653e-05	3.85022e-05
chr1|171519607|171525696|L1PA6:L1:LINE|67|-	PRRC2C	0.578696	3.87453e-05	7.9105e-05
chr5|77748008|77754033|L1PA2:L1:LINE|22|-	SCAMP1	0.573418	4.72876e-05	9.45752e-05
chr1|100665158|100671644|L1PA7:L1:LINE|78|+	DBT	0.546824	0.000122745	0.00024058
chr11|14616306|14622422|L1PA6:L1:LINE|66|-	PSMA1	0.542087	0.000144268	0.00027722
chr6|76609458|76615462|L1PA3:L1:LINE|32|-	MYO6	0.539575	0.000157023	0.000295928
chr11|77037749|77042841|L1PA4:L1:LINE|37|+	PAK1	0.538972	0.000160231	0.000296277
chr2|170105133|170111166|L1HS:L1:LINE|5|+	LRP2	0.53483	0.000183938	0.000333813
chr7|86669072|86675084|L1PA2:L1:LINE|26|+	KIAA1324L	0.516335	0.000333413	0.000594081
chr4|20740248|20746401|L1PA5:L1:LINE|71|+	PACRGL	0.490989	0.000714315	0.00125005
chr11|108227658|108233694|L1PA2:L1:LINE|25|+	C11orf65	0.479114	0.00100084	0.00172074
chr2|197770311|197776343|L1HS:L1:LINE|4|+	PGAP1	0.471879	0.00122197	0.00206471
chr3|43607314|43613339|L1PA2:L1:LINE|25|+	ANO10	0.458157	0.00176359	0.00292935
chr12|48068016|48073191|L1PA6:L1:LINE|65|+	RPAP3	0.443086	0.00259421	0.00423721
chr3|15433014|15439121|L1PA4:L1:LINE|51|-	METTL6	0.43299	0.00332773	0.00534618
chr15|102166653|102172678|L1PA2:L1:LINE|24|+	TM2D3	0.425599	0.00397449	0.00628227
chr11|11906779|11912696|L1PA10:L1:LINE|114|+	USP47	0.422539	0.00427285	0.00664666
chr4|20740248|20746401|L1PA5:L1:LINE|71|+	KCNIP4	0.421161	0.0044135	0.00675817
chr11|108227658|108233694|L1PA2:L1:LINE|25|+	ATM	0.37655	0.0117577	0.0174583
chr20|8575748|8581774|L1PA2:L1:LINE|19|-	PLCB1	0.376865	0.0116818	0.0174583
chrY|14959405|14965588|L1PA6:L1:LINE|82|-	USP9Y	0.365983	0.0145579	0.0212937
chr1|172560414|172566554|L1PA5:L1:LINE|67|-	SUCO	0.332847	0.0272672	0.0392968
chr4|167664640|167670800|L1PA5:L1:LINE|75|+	SPOCK3	0.326752	0.0303999	0.0431766
chr6|144172713|144178208|L1PA7:L1:LINE|83|-	LTV1	0.307426	0.0423587	0.0593022
chr5|74002130|74008268|L1PA3:L1:LINE|34|+	HEXB	0.303722	0.0450393	0.0621669
chr7|17846287|17852748|L1PA7:L1:LINE|96|+	SNX13	0.297944	0.0494945	0.0673675
chr9|8324107|8330317|L1PA7:L1:LINE|119|-	PTPRD	0.293126	0.053476	0.0717896
chrX|67744363|67750771|L1PA7:L1:LINE|82|-	YIPF6	0.285537	0.0602668	0.0798128
chr7|39047127|39053152|L1PA2:L1:LINE|23|-	POU6F2	0.277449	0.0682446	0.0891729
chr12|4618061|4624067|L1PA2:L1:LINE|18|+	C12orf4	0.274945	0.0708768	0.0913938
chr8|103329168|103335319|L1PA3:L1:LINE|35|+	UBR5	0.266259	0.0806361	0.102628
chr4|91596877|91602908|L1HS:L1:LINE|4|-	CCSER1	-0.249864	0.10189	0.128016
chr1|220814954|220821404|L1PA10:L1:LINE|100|+	MARK1	0.247082	0.105888	0.131355
chr6|79681232|79687246|L1PA3:L1:LINE|29|+	PHIP	0.225668	0.14078	0.172455
chr11|82977176|82983297|L1PA6:L1:LINE|63|+	CCDC90B	0.208001	0.175458	0.212282
chr12|4781112|4787459|L1PA7:L1:LINE|89|+	NDUFA9	0.199346	0.194525	0.232481
chr20|52072101|52078105|L1PA3:L1:LINE|25|-	TSHZ2	0.191869	0.212138	0.250476
chr11|113094669|113100816|L1PA5:L1:LINE|55|+	NCAM1	0.14794	0.337882	0.394196
chr9|70450620|70456693|L1PA3:L1:LINE|28|+	CBWD5	-0.125053	0.418624	0.482649
chr11|58638766|58644895|L1PA4:L1:LINE|50|-	GLYATL2	0.0962181	0.534396	0.608963
chrX|130712654|130718709|L1PA2:L1:LINE|25|+	IGSF1	0.087286	0.573163	0.645632
chr14|88922077|88928190|L1PA4:L1:LINE|59|-	SPATA7	0.0788711	0.610819	0.680231
chr6|91271827|91277941|L1PA5:L1:LINE|62|+	MAP3K7	-0.0745145	0.63072	0.694501
chr5|150122399|150128512|L1PA3:L1:LINE|36|+	DCTN4	0.064035	0.679639	0.740051
chr17|58958801|58964835|L1PA2:L1:LINE|17|-	BCAS3	0.0444276	0.774605	0.82695
chr7|131000000|131006360|L1PA8:L1:LINE|97|+	MKLN1	-0.0440806	0.77632	0.82695
chr4|42043774|42050256|L1PA7:L1:LINE|86|+	SLC30A9	-0.0310375	0.84148	0.886721
chr11|96138784|96144829|L1PA2:L1:LINE|18|-	JRKL	-0.0226429	0.884007	0.91324
chr12|96709720|96715749|L1PA2:L1:LINE|13|+	CDK17	0.022392	0.885284	0.91324
chr15|56426816|56432826|L1PA2:L1:LINE|28|-	RFX7	-0.0204244	0.895306	0.913958
chr12|79433401|79439425|L1PA2:L1:LINE|26|-	SYT1	-0.017063	0.912463	0.92187
chr3|51681874|51687951|L1PA6:L1:LINE|64|+	RAD54L2	-0.0113169	0.941878	0.941878
